# Supplementary material
Source: publisher figshare collection journal article supplement (https://acs.figshare.com/ndownloader/files/5844948)
Supplement: Supplementary file 1 [file 5844948]

#
#
#----------------------------------------------------------------------------#
#             CIF file created and formatted by CRYSCALC (June 2016)         #
#----------------------------------------------------------------------------#
# Input CIF files:                                                           #
#  1. job.cif                                                                #
#  2. import.cif                                                             #
# Date of diffraction experiment : 13juin16                                  #
#----------------------------------------------------------------------------#
#

data_WH_P4_26b


#----------------------------------------------------------------------------#
#                              CHEMICAL_INFORMATION                          #
#----------------------------------------------------------------------------#


_chemical_name_systematic
;
 ?
;
_chemical_formula_moiety              'C18 H11 N S'
_chemical_formula_sum                 'C18 H11 N S'
_chemical_formula_weight               273.34
_chemical_compound_source             'synthesis as described'

#----------------------------------------------------------------------------#
#                             UNIT CELL INFORMATION                          #
#----------------------------------------------------------------------------#


_space_group_crystal_system              monoclinic
_space_group_name_H-M_alt                'P 21/c'
_space_group_name_Hall                   '-P 2ybc'
_space_group_IT_number                    14
loop_
  _space_group_symop_operation_xyz
 'x, y, z'
 '-x, y+1/2, -z+1/2'
 '-x, -y, -z'
 'x, -y-1/2, z-1/2'

_cell_length_a                         6.9955(12)
_cell_length_b                         14.118(2)
_cell_length_c                         12.822(2)
_cell_angle_alpha                      90
_cell_angle_beta                       98.536(7)
_cell_angle_gamma                      90
_cell_volume                           1252.3(4)
_cell_formula_units_Z                 4
_cell_measurement_temperature         150
_cell_measurement_reflns_used            2515
_cell_measurement_theta_min              2.89
_cell_measurement_theta_max             27.01
_cell_measurement_wavelength           0.71073

#----------------------------------------------------------------------------#
#                              CRYSTAL INFORMATION                           #
#----------------------------------------------------------------------------#

_exptl_crystal_description             plate
_exptl_crystal_colour                  colourless
_exptl_crystal_size_max                 0.210
_exptl_crystal_size_mid                 0.150
_exptl_crystal_size_min                 0.030
_exptl_crystal_density_meas           ?
_exptl_crystal_density_diffrn         1.450
_exptl_crystal_density_method         ?
_exptl_crystal_F_000                  568
_exptl_special_details
;
 ?
;

#----------------------------------------------------------------------------#
#                             ABSORPTION CORRECTION                          #
#----------------------------------------------------------------------------#

_exptl_absorpt_coefficient_mu                         0.245
_exptl_absorpt_correction_type                       multi-scan
_exptl_absorpt_process_details
;
  [Sheldrick, G.M. (2014). SADABS Bruker AXS Inc., Madison, Wisconsin, USA]
;
_exptl_absorpt_correction_T_min                         0.769
_exptl_absorpt_correction_T_max                         0.993

#----------------------------------------------------------------------------#
#                                DATA COLLECTION                             #
#----------------------------------------------------------------------------#

_diffrn_measurement_device_type        'D8 VENTURE Bruker AXS'
_diffrn_measurement_method             'rotation images'
_diffrn_detector                       '(CMOS) PHOTON 100'
_diffrn_ambient_temperature             150
_diffrn_radiation_wavelength            0.71073
_diffrn_radiation_type                  MoK\a
_diffrn_radiation_probe                 x-ray
_diffrn_radiation_source                'Incoatec microfocus sealed tube'
_diffrn_radiation_monochromator         'multilayer monochromator'
_diffrn_reflns_av_r_equivalents         0.1050
_diffrn_reflns_av_uneti/neti            0.0984
_diffrn_reflns_number                   10490
_diffrn_reflns_limit_h_min              -7
_diffrn_reflns_limit_h_max              9
_diffrn_reflns_limit_k_min              -18
_diffrn_reflns_limit_k_max              18
_diffrn_reflns_limit_l_min              -16
_diffrn_reflns_limit_l_max              16
_diffrn_reflns_theta_min                2.944
_diffrn_reflns_theta_max                27.472
_diffrn_reflns_theta_full               25.242
_diffrn_measured_fraction_theta_full    0.998
_diffrn_measured_fraction_theta_max     0.996
_reflns_number_total                    2856
_reflns_number_gt                       1900
_reflns_threshold_expression            >2sigma(I)

#----------------------------------------------------------------------------#
#                             COMPUTER PROGRAMS USED                         #
#----------------------------------------------------------------------------#

_computing_data_collection       'SAINT (Bruker, 2014)'
_computing_cell_refinement       'APEX3 (Bruker, 2015); SAINT (Bruker, 2014)'
_computing_data_reduction        'SAINT (Bruker, 2014)'
_computing_structure_solution    'SHELXT (Sheldrick, 2015)'
_computing_structure_refinement  'SHELXL-2014/7 (Sheldrick, 2014)'
_computing_molecular_graphics    'SXGRAPH (Farrugia, 1999), Mercury (CSD, 2014)'
_computing_publication_material  'CRYSCALC (T. Roisnel, local program, 2016)'

#----------------------------------------------------------------------------#
#                             REFINEMENT INFORMATION                         #
#----------------------------------------------------------------------------#

_refine_special_details
;
Refinement of F^2^ against ALL reflections.  The weighted R-factor wR and
goodness of fit S are based on F^2^, conventional R-factors R are based
on F, with F set to zero for negative F^2^. The threshold expression of
F^2^ > 2sigma(F^2^) is used only for calculating R-factors(gt) etc. and is
not relevant to the choice of reflections for refinement.  R-factors based
on F^2^ are statistically about twice as large as those based on F, and R-
factors based on ALL data will be even larger.
;
_refine_ls_structure_factor_coef        Fsqd
_refine_ls_matrix_type                  full
_refine_ls_weighting_scheme             calc
_refine_ls_weighting_details
        'w=1/[\s^2^(Fo^2^)+(0.0424P)^2^+1.6517P] where P=(Fo^2^+2Fc^2^)/3'
_atom_sites_solution_primary            ?
_atom_sites_solution_secondary          ?
_atom_sites_solution_hydrogens          geom
_refine_ls_hydrogen_treatment           constr
_refine_ls_extinction_method            none
_refine_ls_extinction_coef              .
_refine_ls_number_reflns                2856
_refine_ls_number_parameters            182
_refine_ls_number_restraints            0
_refine_ls_R_factor_all                 0.1092
_refine_ls_R_factor_gt                  0.0610
_refine_ls_wR_factor_ref                0.1372
_refine_ls_wR_factor_gt                 0.1190
_refine_ls_goodness_of_fit_ref          0.995
_refine_ls_restrained_S_all             0.995
_refine_ls_shift/su_max                 0.000
_refine_ls_shift/su_mean                0.000
_refine_diff_density_max                0.377
_refine_diff_density_min                -0.500
_refine_diff_density_rms                0.078

#...............................................................................
# .RES SHELXL file: job.res
# .HKL SHELXL file: job.hkl
#...............................................................................

_shelx_res_file
;

    job.res created by SHELXL-2014/7


TITL import_a.res in P2(1)/c
CELL  0.71073   6.9955  14.1183  12.8216   90.000   98.536   90.000
ZERR     4.00   0.0012   0.0022   0.0024    0.000    0.007    0.000
LATT   1
SYMM  - X, 1/2 + Y, 1/2 - Z
SFAC  C    H    N    S
UNIT  72   44   4    4
MERG   2
EQIV $1 -x, -y+1, -z+1
HTAB C19 N1_$1
FMAP   2
PLAN   20
ACTA
BOND   $H
CONF
LIST   4
WPDB  -2
L.S.   4
TEMP  -123.00
WGHT    0.042400    1.651700
FVAR       0.48246
N1    3    0.380918    0.194107    0.532694    11.00000    0.04094    0.02149 =
         0.02300   -0.00045    0.00465    0.00483
C2    1    0.337809    0.268296    0.501093    11.00000    0.02361    0.02251 =
         0.01378   -0.00378    0.00384    0.00030
C3    1    0.278075    0.356515    0.448442    11.00000    0.01374    0.01902 =
         0.01750   -0.00036    0.00683   -0.00017
C4    1    0.229475    0.346675    0.341104    11.00000    0.01787    0.02124 =
         0.01685   -0.00484    0.00592   -0.00055
AFIX  43
H4    2    0.236809    0.285933    0.310064    11.00000   -1.20000
AFIX   0
C5    1    0.170180    0.423342    0.277456    11.00000    0.02347    0.02599 =
         0.01172   -0.00242    0.00161   -0.00062
AFIX  43
H5    2    0.138607    0.415959    0.203250    11.00000   -1.20000
AFIX   0
C6    1    0.157861    0.510239    0.323582    11.00000    0.01842    0.02172 =
         0.01433    0.00259    0.00376   -0.00030
AFIX  43
H6    2    0.114635    0.563160    0.280708    11.00000   -1.20000
AFIX   0
C7    1    0.207717    0.522708    0.432751    11.00000    0.01227    0.01771 =
         0.01326    0.00174    0.00296   -0.00126
C8    1    0.269318    0.445510    0.499979    11.00000    0.00934    0.01585 =
         0.01491   -0.00093    0.00539   -0.00173
C9    1    0.317889    0.461910    0.613167    11.00000    0.01294    0.01716 =
         0.01236    0.00102    0.00516   -0.00120
C10   1    0.377505    0.389905    0.687098    11.00000    0.02264    0.01553 =
         0.01829    0.00024    0.00634   -0.00283
AFIX  43
H10   2    0.386684    0.326817    0.662553    11.00000   -1.20000
AFIX   0
C11   1    0.422504    0.407405    0.792547    11.00000    0.02310    0.02385 =
         0.01646    0.00733    0.00227    0.00029
AFIX  43
H11   2    0.460083    0.356698    0.839875    11.00000   -1.20000
AFIX   0
C12   1    0.413641    0.498753    0.830889    11.00000    0.02651    0.02698 =
         0.01054   -0.00146    0.00314    0.00114
AFIX  43
H12   2    0.447284    0.511098    0.904152    11.00000   -1.20000
AFIX   0
C13   1    0.356098    0.570970    0.762448    11.00000    0.02209    0.01818 =
         0.01768   -0.00132    0.00457    0.00142
AFIX  43
H13   2    0.350489    0.633614    0.788873    11.00000   -1.20000
AFIX   0
C14   1    0.305337    0.554625    0.654429    11.00000    0.01463    0.01812 =
         0.01203    0.00145    0.00459   -0.00028
C15   1    0.241505    0.631349    0.584536    11.00000    0.01244    0.01627 =
         0.01412   -0.00129    0.00489   -0.00318
C16   1    0.195121    0.614130    0.478912    11.00000    0.01362    0.01472 =
         0.01519    0.00417    0.00533   -0.00033
C17   1    0.214584    0.728913    0.610480    11.00000    0.01953    0.01298 =
         0.01689   -0.00153    0.00749   -0.00255
AFIX  43
H17   2    0.240224    0.753204    0.680255    11.00000   -1.20000
AFIX   0
C18   1    0.149037    0.782601    0.525441    11.00000    0.01914    0.01603 =
         0.01959    0.00009    0.00739   -0.00164
C19   1    0.102138    0.885881    0.522061    11.00000    0.03294    0.01593 =
         0.02436    0.00037    0.00592    0.00206
AFIX 137
H19A  2    0.155726    0.915217    0.589350    11.00000   -1.50000
H19B  2   -0.038478    0.894256    0.509855    11.00000   -1.50000
H19C  2    0.158397    0.915925    0.464761    11.00000   -1.50000
AFIX   0
S1    4    0.117385    0.716465    0.410586    11.00000    0.02441    0.01509 =
         0.01539    0.00313    0.00305    0.00037
HKLF    4

REM  import_a.res in P2(1)/c
REM R1 =  0.0610 for    1900 Fo > 4sig(Fo)  and  0.1092 for all    2856 data
REM    182 parameters refined using      0 restraints

END

WGHT      0.0414      1.2472

REM Highest difference peak  0.377,  deepest hole -0.500,  1-sigma level  0.078
Q1    1  -0.0128  0.7052  0.3598  11.00000  0.05    0.38
Q2    1   0.1266  0.6536  0.4431  11.00000  0.05    0.31
Q3    1   0.2205  0.5727  0.4536  11.00000  0.05    0.29
Q4    1   0.3180  0.5096  0.6359  11.00000  0.05    0.29
Q5    1  -0.0345  0.7595  0.4155  11.00000  0.05    0.28
Q6    1   0.2452  0.7210  0.4597  11.00000  0.05    0.27
Q7    1   0.4194  0.4334  0.6498  11.00000  0.05    0.27
Q8    1   0.2562  0.3912  0.4845  11.00000  0.05    0.27
Q9    1   0.2734  0.7705  0.5766  11.00000  0.05    0.26
Q10   1   0.0499  0.6246  0.2782  11.00000  0.05    0.26
Q11   1   0.0201  0.5637  0.2410  11.00000  0.05    0.26
Q12   1   0.2505  0.5921  0.6175  11.00000  0.05    0.26
Q13   1  -0.0315  0.6906  0.4412  11.00000  0.05    0.26
Q14   1   0.2642  0.6632  0.3990  11.00000  0.05    0.25
Q15   1   0.0845  0.5653  0.5667  11.00000  0.05    0.25
Q16   1   0.2512  0.7310  0.3510  11.00000  0.05    0.25
Q17   1   0.3134  0.3144  0.4756  11.00000  0.05    0.24
Q18   1   0.0968  1.0017  0.3383  11.00000  0.05    0.24
Q19   1   0.3943  0.5611  0.6985  11.00000  0.05    0.24
Q20   1   0.1531  0.2982  0.6855  11.00000  0.05    0.24
;

_shelx_res_checksum              70998

# ............... End of .RES file .............................................

_shelx_hkl_file
;
  -1   0   0   -0.06    3.73   0
   1   0   0   -0.62    4.10   0
   2   0   0 4386.82  269.36   0
  -2   0   0 4425.17  268.97   0
   3   0   0  177.15   22.57   0
  -3   0   0  187.08   21.06   0
   4   0   0  574.58   35.61   0
   5   0   0    7.00    4.19   0
   6   0   0   18.87    6.32   0
   7   0   0   50.22    7.91   0
   7   0   0   20.47    8.85   0
   8   0   0   31.20    9.76   0
   8   0   0    3.86   12.36   0
   1  -1   0  181.40   11.45   0
   2  -1   0 4004.85  233.33   0
  -2   1   0 3541.64  232.18   0
   3  -1   0   43.85    4.98   0
   4  -1   0   18.03    4.00   0
   5  -1   0   52.57    6.47   0
   5   1   0   42.29    5.98   0
   6  -1   0   87.52   10.28   0
   6  -1   0   96.56   10.27   0
   6   1   0   97.80   10.06   0
   7  -1   0   44.89   10.10   0
   7  -1   0   42.88    8.52   0
   7   1   0   43.76    9.03   0
   7   1   0   49.52    7.91   0
   8  -1   0   30.84   13.85   0
   8  -1   0   39.38   10.60   0
   8   1   0   36.03   13.19   0
   8   1   0   46.98    9.88   0
   1  -2   0  532.96   32.77   0
   1  -2   0  527.26   32.95   0
  -1   2   0  547.33   32.93   0
   2  -2   0   35.64    4.41   0
   3  -2   0   84.97    7.39   0
   4  -2   0  125.65   10.15   0
   5  -2   0   62.80    8.62   0
   5  -2   0   67.24    7.26   0
   6  -2   0   19.59    6.24   0
   6  -2   0    8.87    7.65   0
   6   2   0   18.94    5.20   0
   7  -2   0    7.14    7.65   0
   7  -2   0   24.36    9.65   0
   7   2   0   18.62    7.62   0
   7   2   0    2.09    6.22   0
   8  -2   0  125.53   17.49   0
   8  -2   0  121.43   16.76   0
   8   2   0  127.50   14.13   0
   8   2   0  132.08   17.94   0
   0  -3   0   -0.93    1.27   0
   0  -3   0   -1.41    2.06   0
   0   3   0    0.12    2.04   0
   0   3   0    0.16    1.36   0
   1  -3   0  224.44   14.29   0
   1  -3   0  207.50   13.86   0
  -1   3   0  224.37   14.25   0
  -1   3   0  198.40   13.90   0
   1   3   0  224.27   13.42   0
   1   3   0  216.15   13.22   0
   2  -3   0  443.34   27.26   0
   2  -3   0  420.59   26.91   0
   3  -3   0   62.69    6.33   0
   3  -3   0   68.91    7.07   0
   4  -3   0   57.40    7.47   0
   4  -3   0   72.84    7.33   0
   5  -3   0    0.27    4.53   0
   5  -3   0   -3.33    5.60   0
   6  -3   0  151.65   15.14   0
   6  -3   0  144.40   13.51   0
   6   3   0  153.16   11.49   0
   7  -3   0   73.25   10.58   0
   7  -3   0   62.45   12.51   0
   7   3   0   78.31    9.39   0
   8  -3   0   53.09   16.06   0
   8  -3   0   45.73   11.95   0
   8   3   0   38.61   11.85   0
   8   3   0   50.13    8.75   0
   0  -4   0  127.57    8.58   0
   0  -4   0  108.73    7.63   0
   0   4   0  116.72    8.51   0
   0   4   0  110.91    7.78   0
   1  -4   0   57.64    5.22   0
  -1  -4   0   56.56    4.00   0
  -1  -4   0   60.35    4.21   0
   1  -4   0   63.40    6.00   0
  -1   4   0   53.85    5.25   0
  -1   4   0   60.07    5.98   0
   1   4   0   60.83    4.21   0
   1   4   0   62.38    4.82   0
   2  -4   0    5.53    3.45   0
   2  -4   0    4.00    2.68   0
   3  -4   0   68.64    7.31   0
   3  -4   0   63.88    6.68   0
   4  -4   0  191.60   13.40   0
   4  -4   0  173.71   14.12   0
   5  -4   0   37.16    6.36   0
   5  -4   0   37.45    7.61   0
   6  -4   0   65.40   10.15   0
   6  -4   0   64.46    8.63   0
   6   4   0   46.23    6.25   0
   7  -4   0   16.29   11.36   0
   7  -4   0   25.53    9.18   0
   7   4   0   32.26    7.31   0
   8  -4   0  -27.32   15.46   0
   8  -4   0   -6.96   11.15   0
   8   4   0    9.64    7.42   0
   8   4   0   21.17   10.69   0
   0  -5   0    0.01    2.73   0
   0  -5   0    2.73    1.64   0
   0   5   0   -1.26    1.91   0
   0   5   0    3.95    2.91   0
  -1  -5   0  300.62   18.61   0
   1  -5   0  292.34   18.97   0
   1  -5   0  312.20   19.68   0
  -1  -5   0  305.35   18.36   0
  -1   5   0  269.17   19.02   0
   1   5   0  303.05   18.51   0
  -1   5   0  298.98   19.56   0
   1   5   0  302.96   18.93   0
   2  -5   0  103.47    8.17   0
   2  -5   0   90.80    8.97   0
   2   5   0  100.93    6.95   0
   2   5   0  104.50    6.61   0
   3  -5   0    2.56    4.57   0
   3  -5   0   12.06    3.74   0
   4  -5   0   16.50    5.72   0
   4  -5   0   11.68    4.67   0
   5  -5   0   11.84    7.08   0
   5  -5   0   12.30    5.64   0
   6  -5   0    7.81    7.00   0
   6  -5   0   -2.19    9.26   0
   6   5   0   -2.51    3.15   0
   7  -5   0   26.17   12.85   0
   7  -5   0   27.76    9.61   0
   7   5   0   27.14    6.69   0
   8  -5   0  -10.05   11.23   0
   8  -5   0  -16.82   16.61   0
   8   5   0    2.95    6.77   0
   8   5   0   -7.48   10.19   0
   0  -6   0  390.18   24.90   0
   0  -6   0  431.33   25.72   0
   0   6   0  375.28   25.07   0
   0   6   0  411.02   25.69   0
   1  -6   0   49.59    5.92   0
   1  -6   0   41.08    4.93   0
  -1  -6   0   40.49    3.55   0
  -1  -6   0   45.03    4.48   0
  -1   6   0   34.63    5.08   0
  -1   6   0   49.47    5.94   0
   1   6   0   37.94    4.04   0
   1   6   0   43.98    5.01   0
   2  -6   0    5.33    3.13   0
   2  -6   0   11.52    4.39   0
   2   6   0    1.18    1.61   0
   2   6   0    4.10    2.48   0
   3  -6   0    0.37    3.76   0
   3  -6   0    2.11    4.68   0
   3   6   0    0.77    1.31   0
   3   6   0    0.17    1.86   0
   4  -6   0  143.70   12.65   0
   4  -6   0  120.73   11.22   0
   5  -6   0   27.17    8.34   0
   5  -6   0   23.89    6.71   0
   6  -6   0    6.34    7.98   0
   6  -6   0    5.36    9.96   0
   7  -6   0   -6.47   13.18   0
   7  -6   0    3.75    9.64   0
   7   6   0   -2.67    5.52   0
   8  -6   0  -21.29   11.80   0
   8  -6   0  -16.09   17.98   0
   8   6   0   -2.99    9.32   0
   8   6   0    2.48    6.06   0
   0  -7   0   -4.92    3.39   0
   0  -7   0    1.29    2.17   0
   0   7   0    0.55    2.56   0
   0   7   0   -1.60    3.69   0
  -1  -7   0  130.43    8.79   0
   1  -7   0  137.56   11.04   0
  -1  -7   0  128.30    9.44   0
   1  -7   0  135.86    9.79   0
   1   7   0  140.22   10.15   0
   1   7   0  132.92    9.25   0
  -1   7   0  126.12   10.11   0
  -1   7   0  125.04   10.76   0
   2  -7   0   77.69    9.20   0
   2  -7   0   79.17    7.79   0
   2   7   0   94.37    6.38   0
   2   7   0   90.48    7.31   0
  -2   7   0   71.65    8.62   0
   3  -7   0   37.97    7.21   0
   3  -7   0   54.53    6.62   0
   3   7   0   47.67    4.01   0
   3   7   0   42.46    5.01   0
   4  -7   0   -2.96    4.92   0
   4  -7   0    5.38    6.63   0
   4   7   0   -0.34    2.39   0
   4   7   0    2.36    1.74   0
   5  -7   0   14.21    8.44   0
   5  -7   0   11.19    6.72   0
   6  -7   0    9.00   10.95   0
   6  -7   0   -5.50    8.06   0
   7  -7   0   11.65   15.16   0
   7  -7   0   29.18   10.44   0
   8  -7   0    1.91   13.52   0
   8  -7   0   20.52   20.11   0
   0  -8   0   80.66    6.94   0
   0  -8   0   94.78    8.89   0
   0   8   0   85.33    8.84   0
   0   8   0   93.07    7.73   0
  -1  -8   0   28.87    4.22   0
   1  -8   0   22.63    3.97   0
   1  -8   0   25.93    5.45   0
  -1  -8   0   25.63    3.47   0
   1   8   0   19.95    4.75   0
  -1   8   0   25.28    5.64   0
  -1   8   0   28.32    4.86   0
   1   8   0   31.63    4.02   0
   2  -8   0    9.10    5.62   0
   2  -8   0    6.90    4.17   0
   2   8   0    8.98    3.71   0
   2   8   0    7.31    2.72   0
   3  -8   0  136.87   10.98   0
   3  -8   0  115.66   12.43   0
   3   8   0  122.50    9.49   0
   3   8   0  119.91    8.57   0
   4  -8   0    6.99    7.70   0
   4  -8   0   21.84    6.07   0
   4   8   0   18.13    3.74   0
   4   8   0   16.66    2.73   0
   5  -8   0   60.79   11.13   0
   5  -8   0   67.59    9.14   0
   5   8   0   60.73    5.90   0
   5   8   0   53.67    4.83   0
   6  -8   0   19.75    8.52   0
   6  -8   0   27.98   12.95   0
   7  -8   0    3.52   10.36   0
   7  -8   0   24.22   16.45   0
   8  -8   0  -12.88   21.24   0
   8  -8   0   -9.40   14.68   0
   0  -9   0   -1.16    4.28   0
   0  -9   0    5.69    2.71   0
   0   9   0   -1.29    4.73   0
   0   9   0    3.29    3.62   0
   1  -9   0    6.39    5.48   0
  -1  -9   0    7.15    2.49   0
  -1  -9   0    4.85    3.70   0
   1  -9   0    5.81    3.47   0
  -1   9   0    8.09    5.46   0
   1   9   0   11.51    4.80   0
   1   9   0    9.17    3.60   0
  -1   9   0    4.94    4.37   0
   2  -9   0   -0.53    5.91   0
   2  -9   0   12.82    4.65   0
   2   9   0    6.61    4.25   0
   2   9   0    8.65    3.29   0
   3  -9   0    3.32    4.89   0
   3  -9   0    0.03    6.38   0
   3   9   0   -1.87    4.20   0
   3   9   0    0.56    2.93   0
   4  -9   0  203.65   17.34   0
   4  -9   0  220.79   19.57   0
   4   9   0  236.51   14.62   0
   4   9   0  220.88   15.58   0
   5  -9   0   10.79    7.65   0
   5  -9   0   -5.71   10.22   0
   5   9   0   12.23    3.18   0
   5   9   0   17.28    4.61   0
   6  -9   0   69.97   11.09   0
   6  -9   0   89.22   17.28   0
   6   9   0   58.84    5.73   0
   7  -9   0    7.62   11.78   0
   7  -9   0   31.64   18.11   0
   0 -10   0   83.55    7.35   0
   0 -10   0   88.70    9.90   0
   0  10   0   80.58    8.74   0
   0  10   0   76.01   10.17   0
   1 -10   0   28.85    4.93   0
  -1 -10   0   22.92    4.83   0
   1 -10   0   21.82    6.76   0
  -1 -10   0   21.21    3.60   0
  -1  10   0   23.13    6.74   0
  -1  10   0   26.38    5.80   0
   1  10   0   29.20    5.13   0
   1  10   0   24.67    6.34   0
   2 -10   0  268.99   19.10   0
   2 -10   0  276.81   20.61   0
   2  10   0  271.09   18.31   0
   2  10   0  268.03   19.22   0
   3 -10   0  183.03   15.08   0
   3 -10   0  164.42   17.10   0
   3  10   0  183.68   13.24   0
   3  10   0  197.37   14.46   0
   4 -10   0  461.21   32.80   0
   4 -10   0  424.19   30.78   0
   4  10   0  464.98   28.83   0
   4  10   0  473.28   29.58   0
   5 -10   0   60.89   10.02   0
   5 -10   0   64.64   13.19   0
   5  10   0   61.45    8.57   0
   5  10   0   56.76    6.98   0
   6 -10   0  -17.41   10.00   0
   6 -10   0   31.17   15.54   0
   6  10   0    0.60    4.75   0
   7 -10   0   -4.69   12.96   0
   7 -10   0   27.93   19.74   0
   0 -11   0    3.20    5.80   0
   0 -11   0   -0.76    3.71   0
   0  11   0   -2.74    6.54   0
   0  11   0   -9.27    5.33   0
   1 -11   0  232.99   19.17   0
  -1 -11   0  230.45   17.08   0
  -1 -11   0  248.70   16.06   0
   1 -11   0  248.21   17.11   0
   1  11   0  233.19   17.42   0
  -1  11   0  247.44   19.22   0
   1  11   0  237.28   18.50   0
   2 -11   0  786.30   49.08   0
   2 -11   0  767.89   50.62   0
   2  11   0  774.97   49.38   0
   2  11   0  782.05   48.68   0
   3 -11   0   23.75    8.85   0
   3 -11   0   -1.97    6.59   0
   3  11   0   16.17    5.31   0
   3  11   0   17.19    6.26   0
   4 -11   0   59.59    9.82   0
   4 -11   0   56.43   11.74   0
   4  11   0   52.86    8.11   0
   4  11   0   53.18    7.06   0
   5 -11   0   13.97   12.25   0
   5 -11   0    1.30    8.34   0
   5  11   0   -0.29    5.90   0
   6 -11   0   58.90   16.62   0
   6 -11   0   14.37   12.30   0
   6  11   0   42.82    7.46   0
   7 -11   0  -18.52   13.83   0
   7 -11   0    5.99   21.03   0
   0 -12   0  221.44   15.48   0
   0 -12   0  211.49   17.49   0
   0  12   0  210.58   17.50   0
   0  12   0  223.19   18.26   0
  -1 -12   0   79.63    7.83   0
   1 -12   0   79.88   10.92   0
  -1 -12   0   73.80    9.65   0
   1 -12   0   92.58    9.56   0
  -1  12   0   89.16   11.91   0
   1  12   0   91.11    9.89   0
   1  12   0   85.18   12.08   0
   2 -12   0   21.40    9.81   0
   2 -12   0   33.36    6.91   0
   2  12   0   36.91    8.46   0
   2  12   0   37.18    7.04   0
   3 -12   0    2.39    6.99   0
   3 -12   0   -2.29    9.41   0
   3  12   0   -5.20    6.10   0
   3  12   0    8.09    7.24   0
   4 -12   0   -2.73   11.48   0
   4 -12   0    3.09    7.81   0
   4  12   0   32.27    8.03   0
   4  12   0   18.27    7.32   0
   5 -12   0  128.22   14.63   0
   5 -12   0   98.98   17.16   0
   5  12   0   92.34   12.59   0
   6 -12   0    8.60   17.03   0
   6 -12   0    4.52   12.87   0
   6  12   0    6.94    8.74   0
   0 -13   0   -2.16    7.52   0
   0 -13   0    0.64    4.83   0
   0  13   0   13.43    7.20   0
   0  13   0    4.80    8.59   0
   1 -13   0   67.82   11.07   0
  -1 -13   0   49.83    6.33   0
   1 -13   0   61.47    8.36   0
  -1 -13   0   62.45    8.44   0
   1  13   0   57.64   10.27   0
   1  13   0   76.13    9.85   0
   2 -13   0   21.16    7.72   0
   2 -13   0   16.61    9.98   0
   2  13   0   24.07    8.77   0
   2  13   0    1.45    7.13   0
   3 -13   0  136.11   19.81   0
   3 -13   0  153.13   15.54   0
   3  13   0  144.24   14.99   0
   3  13   0  167.39   16.44   0
   4 -13   0   13.38   13.53   0
   4 -13   0   -6.00    9.50   0
   4  13   0    3.45    8.26   0
   5 -13   0   68.39   17.20   0
   5 -13   0   36.46   12.38   0
   5  13   0   34.85    9.92   0
   6 -13   0   73.29   20.45   0
   6 -13   0   -7.57   13.19   0
   0 -14   0  231.16   17.07   0
   0 -14   0  227.30   20.04   0
  -1 -14   0   66.04    9.05   0
   1 -14   0   50.47    8.70   0
  -1 -14   0   62.94    8.23   0
   1 -14   0   39.56   11.07   0
   1  14   0   70.19   11.65   0
   1  14   0   54.08   10.28   0
   2 -14   0   18.33    8.07   0
   2 -14   0    2.30   11.91   0
   2  14   0   10.13    8.60   0
   2  14   0   22.84   10.02   0
   3 -14   0   52.12   14.63   0
   3 -14   0   85.77   11.44   0
   3  14   0   51.29   11.63   0
   4 -14   0   36.90   11.07   0
   4 -14   0   63.58   16.62   0
   4  14   0   70.21   11.26   0
   5 -14   0   33.30   12.39   0
   5 -14   0   24.75   18.77   0
   5  14   0   16.20   12.33   0
   0 -15   0    0.27    9.63   0
   0 -15   0   -7.80    6.16   0
  -1 -15   0   48.21    9.05   0
  -1 -15   0   33.42    6.84   0
   1 -15   0   56.29    9.01   0
   1 -15   0   60.77   12.46   0
   2 -15   0   50.97   10.69   0
   2 -15   0   60.02   13.60   0
   2  15   0   49.78   12.02   0
   3 -15   0   77.14   16.69   0
   3 -15   0   74.44   12.89   0
   3  15   0   85.47   13.87   0
   4 -15   0   12.55   17.05   0
   4 -15   0  -12.44   12.62   0
   4  15   0  -22.98   12.55   0
   5 -15   0  -10.44   20.17   0
   5 -15   0   52.88   16.59   0
   0 -16   0   55.27    8.90   0
   0 -16   0   42.34   12.28   0
   1 -16   0   64.01   10.65   0
  -1 -16   0   65.25    8.54   0
  -1 -16   0   51.90   10.52   0
   1 -16   0   87.34   14.65   0
   2 -16   0   23.74   15.24   0
   2 -16   0   14.74   10.52   0
   3 -16   0   43.73   13.63   0
   3 -16   0  104.33   19.45   0
   4 -16   0   16.45   15.31   0
   4 -16   0   21.97   19.19   0
   0 -17   0  -11.60   12.58   0
   0 -17   0    1.33    8.89   0
  -1 -17   0   15.29   10.36   0
   1 -17   0   -4.37    9.95   0
  -1 -17   0  -13.74    7.39   0
   1 -17   0   -2.86   15.34   0
   2 -17   0  135.03   21.15   0
   2 -17   0  155.53   20.35   0
   3 -17   0   46.15   19.20   0
   3 -17   0   51.68   16.16   0
   0 -18   0  117.20   18.15   0
   0 -18   0  138.73   17.00   0
   1 -18   0   26.22   12.10   0
  -1 -18   0   22.50   12.44   0
   1 -18   0   12.37   18.51   0
  -1 -18   0   39.78    9.36   0
   9   0  -1  -15.37   18.61   0
   8   0  -1   15.14   12.34   0
   8   0  -1    2.52    9.60   0
   7   0  -1   -5.76    8.34   0
   6   0  -1    2.65    6.00   0
   5   0  -1    2.16    4.19   0
   4   0  -1   -1.93    3.06   0
   3   0  -1    1.60    2.34   0
   2   0  -1    7.23    1.98   0
  -1   0   1   -1.60    1.09   0
   1   0  -1   -0.15    1.16   0
   1   0   1    1.30    0.78   0
  -1   0  -1    0.36    0.75   0
   2   0   1   -0.75    1.32   0
   3   0   1   -7.74   12.98   0
   4   0   1    0.87    2.59   0
   6   0   1    6.22    4.73   0
   6   0   1   -0.73    5.90   0
   7   0   1    3.16    8.17   0
   7   0   1   -0.19    6.44   0
   8   0   1   -9.41    8.27   0
   8   0   1   21.41   12.40   0
   8  -1  -1   17.73   12.90   0
   8  -1  -1   -0.01   10.00   0
   8   1  -1   -8.85   12.07   0
   8   1  -1    3.31    9.99   0
   7  -1  -1    2.15    9.01   0
   7   1  -1   -1.11    7.93   0
   6  -1  -1    2.25    6.65   0
   6   1  -1    0.04    5.68   0
   5  -1  -1    1.19    4.54   0
   5   1  -1    4.48    3.77   0
   4  -1  -1  535.49   33.71   0
   4   1  -1  536.70   33.21   0
   3  -1  -1  139.02   10.13   0
   3   1  -1  144.68    9.39   0
   2  -1  -1 9672.88  594.90   0
  -2  -1   1 9999.00  592.07   0
   2   1  -1 9663.58  591.58   0
  -1  -1   1  122.42    7.50   0
   1  -1  -1  119.22    8.08   0
  -1   1   1  116.55    8.01   0
   1   1  -1  122.45    7.59   0
   1  -1   1    5.90    1.31   0
   1   1   1    3.59    0.55   0
  -1   1  -1    4.65    1.27   0
   2  -1   1   60.85    4.74   0
   3  -1   1  121.07    8.43   0
   4  -1   1   16.15    3.26   0
   5  -1   1   15.71    4.27   0
   5  -1   1   16.40    4.99   0
   5   1   1   23.71    3.88   0
   6  -1   1    9.64    5.18   0
   6  -1   1    5.21    6.49   0
   6   1   1    1.95    4.47   0
   6   1   1   -6.52    5.14   0
   7  -1   1   -4.70    9.18   0
   7  -1   1    4.67    6.80   0
   7   1   1    8.20    7.80   0
   7   1   1    4.46    6.19   0
   8  -1   1   -1.83    8.63   0
   8  -1   1   27.10   12.83   0
   8   1   1   -9.17    7.72   0
   8   1   1   30.38   12.02   0
   8  -2  -1    9.12   10.57   0
   8  -2  -1   27.16   13.79   0
   8   2  -1   12.44   12.02   0
   7  -2  -1    8.63    9.68   0
   7  -2  -1   16.10    8.49   0
   7   2  -1   20.06    8.07   0
   5  -2  -1   -1.32    4.94   0
   5   2  -1    7.68    3.40   0
   4  -2  -1  512.78   33.48   0
   4   2  -1  541.08   32.44   0
   3  -2  -1    1.27    3.14   0
   3   2  -1    3.34    1.32   0
   2  -2  -1  836.10   51.92   0
   2   2  -1  843.32   51.08   0
  -2   2   1  862.02   51.88   0
   1  -2  -1   58.11    5.21   0
  -1  -2   1   56.87    3.83   0
  -1   2   1   62.28    5.19   0
   1   2  -1   56.29    3.95   0
   0  -2  -1   49.49    3.93   0
   0  -2   1   49.43    3.55   0
   0   2   1   51.97    4.10   0
   0   2  -1   48.05    3.52   0
   1  -2   1   21.57    2.41   0
  -1   2  -1   22.04    2.36   0
   1   2   1   15.93    1.48   0
   2  -2   1  308.08   19.30   0
   3  -2   1   19.14    3.14   0
   4  -2   1   -1.57    2.99   0
   5  -2   1   -6.41    4.07   0
   5  -2   1   -0.33    4.91   0
   6  -2   1   70.49    9.37   0
   6  -2   1   58.12    7.76   0
   6   2   1   55.99    7.11   0
   7  -2   1   15.90    7.61   0
   7  -2   1   14.37    9.71   0
   7   2   1   -1.60    7.35   0
   7   2   1   11.52    5.86   0
   8  -2   1   -3.58    9.27   0
   8  -2   1   36.87   14.13   0
   8   2   1   13.58    7.49   0
   8   2   1   22.57   11.66   0
   8  -3  -1   36.40   11.70   0
   8  -3  -1   56.97   15.56   0
   8   3  -1   30.23   12.32   0
   7  -3  -1   16.07    8.87   0
   7  -3  -1    8.86   10.36   0
   7   3  -1   14.33    7.79   0
   6  -3  -1   -5.74    7.75   0
   6  -3  -1    5.84    6.88   0
   6   3  -1   -0.39    4.79   0
   5  -3  -1    6.81    5.92   0
   5   3  -1   12.67    3.19   0
   4  -3  -1   19.12    5.03   0
   4   3  -1   11.31    2.00   0
   3  -3  -1   67.14    7.09   0
   2  -3  -1   15.45    3.59   0
   2   3  -1   11.87    1.49   0
  -2   3   1   17.24    3.49   0
   2   3  -1   10.97    1.47   0
   1  -3  -1   40.43    5.16   0
  -1  -3   1   46.00    3.48   0
  -1  -3   1   46.72    3.67   0
   1   3  -1   49.92    3.57   0
  -1   3   1   48.34    5.14   0
   1   3  -1   47.38    3.95   0
   0  -3  -1   22.13    3.06   0
   0  -3   1   34.28    3.95   0
   0  -3  -1   29.84    3.39   0
   0  -3   1   23.51    2.78   0
   0   3   1   29.62    3.49   0
   0   3  -1   27.98    2.82   0
   1  -3   1  143.15    9.81   0
  -1   3  -1  146.20    9.83   0
   1   3   1  152.34    9.44   0
   1   3   1  151.29    9.26   0
   2  -3   1  119.85    8.48   0
   3  -3   1    3.44    2.76   0
   3  -3   1    1.91    3.44   0
   4  -3   1  117.29    8.89   0
   4  -3   1   99.15    9.51   0
   5  -3   1    1.26    4.46   0
   5  -3   1   -1.60    5.42   0
   6  -3   1  128.04   12.68   0
   6  -3   1  114.90   14.51   0
   6   3   1  154.83   10.36   0
   7  -3   1   17.63    7.96   0
   7  -3   1   -6.72   10.29   0
   7   3   1   23.53    5.69   0
   7   3   1   14.35    6.97   0
   8  -3   1  -19.90   14.59   0
   8  -3   1   -6.26    9.70   0
   8   3   1   18.00   10.97   0
   8   3   1   11.13    7.14   0
   8  -4  -1  -14.87   12.13   0
   8  -4  -1    6.93   15.66   0
   8   4  -1    1.85   11.09   0
   7  -4  -1   53.61   12.53   0
   7  -4  -1   40.58    9.99   0
   7   4  -1   32.87    8.16   0
   6  -4  -1   -8.63    8.37   0
   6  -4  -1   -0.84    6.74   0
   6   4  -1    4.29    4.37   0
   5  -4  -1  108.43   11.52   0
   5  -4  -1  116.85   12.48   0
   5   4  -1  114.72    8.11   0
   4  -4  -1   23.87    5.80   0
   3  -4  -1  105.62    9.39   0
   2  -4  -1    4.26    3.51   0
  -2   4   1    9.76    3.64   0
   2   4  -1    4.96    1.38   0
   2   4  -1    9.69    1.73   0
   1  -4  -1  438.46   27.50   0
   1  -4  -1  432.62   27.84   0
  -1  -4   1  454.49   26.95   0
  -1  -4   1  454.08   27.12   0
   1   4  -1  428.72   27.19   0
   1   4  -1  453.32   27.00   0
  -1   4   1  419.96   27.77   0
   0  -4   1   30.31    3.63   0
   0  -4  -1   19.01    3.22   0
   0  -4   1   21.49    2.49   0
   0  -4  -1   16.36    2.51   0
   0   4  -1   22.44    2.60   0
   0   4   1   21.64    3.45   0
  -1  -4  -1    1.92    1.13   0
   1  -4   1    5.86    2.04   0
   1  -4   1    0.50    2.79   0
  -1  -4  -1    4.53    0.85   0
   1   4   1    4.18    1.42   0
   1   4   1    4.24    1.97   0
  -1   4  -1    2.41    2.07   0
   2  -4   1   -0.85    2.46   0
   2  -4   1    2.34    3.32   0
  -2   4  -1   -0.99    2.64   0
   2   4   1   -0.23    0.59   0
   2   4   1    1.06    0.72   0
   3  -4   1  147.44   10.77   0
   3  -4   1  150.75   11.65   0
   4  -4   1  188.97   13.93   0
   4  -4   1  201.84   14.95   0
   5  -4   1   29.64    7.69   0
   5  -4   1   44.47    6.48   0
   6  -4   1  102.66   12.76   0
   6  -4   1  105.21   11.42   0
   7  -4   1  136.44   17.95   0
   7  -4   1   92.82   13.72   0
   7   4   1  105.54   11.17   0
   7   4   1  111.18    9.59   0
   8  -4   1   -2.66   16.53   0
   8  -4   1   15.72   10.82   0
   8   4   1   21.57    6.70   0
   8   4   1   25.50   10.39   0
   8  -5  -1    4.09   12.82   0
   8  -5  -1   -8.55   16.95   0
   8   5  -1   -2.92   10.52   0
   7  -5  -1   37.20   12.95   0
   7  -5  -1   29.00    9.87   0
   7   5  -1   33.13    7.37   0
   6  -5  -1   -7.02    8.89   0
   6  -5  -1   10.85    7.28   0
   6   5  -1    2.56    4.07   0
   5  -5  -1   66.14    8.29   0
   5  -5  -1   61.01    9.31   0
   5   5  -1   48.42    4.67   0
   4  -5  -1   66.19    9.10   0
   4  -5  -1   65.58    8.64   0
   3  -5  -1  292.89   19.43   0
   3  -5  -1  293.57   19.96   0
   3   5  -1  264.82   17.76   0
   3   5  -1  289.28   17.86   0
  -3   5   1  319.13   19.78   0
   2  -5  -1    8.84    4.30   0
   2  -5  -1   14.58    3.85   0
   2   5  -1   10.49    2.40   0
  -2   5   1   15.01    4.33   0
   2   5  -1   10.11    1.85   0
  -1  -5   1   54.68    4.37   0
   1  -5  -1   51.96    5.56   0
  -1  -5   1   60.01    5.00   0
   1  -5  -1   63.70    6.47   0
   1   5  -1   56.40    4.44   0
  -1   5   1   48.98    6.09   0
   1   5  -1   59.99    5.31   0
   0  -5  -1  107.08    8.22   0
   0  -5   1  104.16    7.30   0
   0  -5   1  114.30    8.36   0
   0  -5  -1  108.50    7.50   0
   0   5   1  101.17    7.73   0
   0   5  -1  103.99    7.48   0
   0   5  -1  105.66    8.20   0
   0   5   1  107.19    8.33   0
  -1  -5  -1 1330.56   81.82   0
   1  -5   1 1363.47   82.35   0
  -1  -5  -1 1303.72   81.98   0
   1  -5   1 1399.84   82.86   0
   1   5   1 1330.08   82.04   0
   1   5   1 1434.41   82.39   0
  -1   5  -1 1328.14   82.40   0
   2  -5   1    4.30    2.75   0
   2  -5   1    1.66    3.67   0
  -2   5  -1    3.88    3.27   0
   2   5   1    3.67    1.34   0
   2   5   1    4.79    1.88   0
   3  -5   1    4.08    4.46   0
   3  -5   1    5.88    3.34   0
   4  -5   1   45.91    7.06   0
   4  -5   1   46.11    6.16   0
   5  -5   1  326.42   22.20   0
   5  -5   1  317.65   23.65   0
   6  -5   1    6.71    6.74   0
   6  -5   1   13.35    9.45   0
   7  -5   1   30.66   12.42   0
   7  -5   1   27.41    9.12   0
   7   5   1   35.00    4.82   0
   7   5   1   15.48    6.12   0
   8  -5   1  -25.62   17.27   0
   8  -5   1   -9.92   11.33   0
   8   5   1   18.43   10.15   0
   8   5   1   -1.93    5.72   0
   8  -6  -1  -19.38   18.54   0
   8  -6  -1  -29.34   12.73   0
   8   6  -1    1.35    9.41   0
   7  -6  -1   34.70   11.69   0
   7  -6  -1   44.73   14.16   0
   7   6  -1   59.98    7.29   0
   6  -6  -1   46.21    8.86   0
   6  -6  -1    9.58   10.30   0
   6   6  -1   40.52    4.79   0
   5  -6  -1  104.68   13.64   0
   5  -6  -1  102.83   11.78   0
   4  -6  -1   -7.59    5.85   0
   4  -6  -1   -0.18    4.89   0
   4   6  -1    3.15    1.69   0
   3  -6  -1   60.93    7.71   0
   3  -6  -1   81.24    8.99   0
  -3   6   1   78.74    8.50   0
   3   6  -1   67.54    5.08   0
   3   6  -1   65.60    5.56   0
   2  -6  -1   61.83    7.47   0
   2  -6  -1   55.87    6.45   0
  -2   6   1   56.21    7.27   0
   2   6  -1   51.73    5.39   0
   2   6  -1   57.69    4.55   0
   1  -6  -1  478.57   31.15   0
  -1  -6   1  517.04   30.62   0
   1  -6  -1  500.01   31.83   0
  -1  -6   1  506.17   30.98   0
  -1   6   1  494.75   31.74   0
   1   6  -1  491.13   31.14   0
   1   6  -1  496.68   30.71   0
   0  -6   1   31.20    4.49   0
   0  -6  -1   28.54    3.33   0
   0  -6  -1   22.56    4.30   0
   0  -6   1   23.20    3.14   0
   0   6  -1   31.37    4.63   0
   0   6   1   24.34    3.80   0
   0   6   1   29.45    4.49   0
   0   6  -1   30.77    3.56   0
  -1  -6  -1   63.64    5.09   0
  -1  -6  -1   59.40    4.44   0
   1  -6   1   65.74    7.18   0
   1  -6   1   60.73    5.54   0
   1   6   1   62.43    6.15   0
  -1   6  -1   55.99    5.84   0
   1   6   1   60.97    5.18   0
   2  -6   1  231.57   16.28   0
   2  -6   1  215.87   15.24   0
  -2   6  -1  225.86   15.51   0
   2   6   1  228.38   14.32   0
   2   6   1  232.97   14.76   0
   3  -6   1  666.71   40.33   0
   3  -6   1  627.31   39.43   0
   3   6   1  616.62   38.30   0
   3   6   1  612.55   38.13   0
   4  -6   1   10.49    6.48   0
   4  -6   1    4.06    4.46   0
   5  -6   1   15.88    8.28   0
   5  -6   1   12.07    5.79   0
   6  -6   1   12.48    7.27   0
   7  -6   1  150.37   18.62   0
   7  -6   1  127.39   15.91   0
   7   6   1  108.62   10.04   0
   8  -6   1   12.68   19.80   0
   8  -6   1   27.99   13.20   0
   8   6   1   56.24    9.88   0
   8   6   1   28.16    5.38   0
   8  -7  -1    5.42   19.67   0
   8  -7  -1   11.34   14.04   0
   8   7  -1   13.92    7.21   0
   7  -7  -1   60.29   11.64   0
   7  -7  -1   67.99   15.76   0
   7   7  -1   33.04    5.52   0
   6  -7  -1   17.73    8.99   0
   6  -7  -1   30.69   11.04   0
   6   7  -1    9.72    3.25   0
   5  -7  -1   98.54   13.54   0
   5  -7  -1  105.43   12.04   0
   5   7  -1   90.98    6.95   0
   4  -7  -1   68.75    9.47   0
   4  -7  -1   79.46   10.41   0
   4   7  -1   68.61    5.54   0
   3  -7  -1  106.38   11.48   0
   3  -7  -1  109.74   10.37   0
   3   7  -1  124.74    8.04   0
   3   7  -1  110.91    8.58   0
  -3   7   1  119.91   11.08   0
   2  -7  -1    9.22    5.09   0
   2  -7  -1    7.90    3.78   0
   2   7  -1   13.53    2.54   0
   2   7  -1   17.90    3.62   0
  -2   7   1    3.18    4.75   0
   1  -7  -1   51.47    6.21   0
  -1  -7   1   56.73    6.07   0
  -1  -7   1   67.01    5.07   0
   1  -7  -1   54.41    7.74   0
   1   7  -1   65.34    6.70   0
   1   7  -1   62.49    5.40   0
  -1   7   1   60.94    7.43   0
   0  -7   1   19.28    4.49   0
   0  -7  -1   24.38    4.39   0
   0  -7   1   18.41    3.05   0
   0  -7  -1   17.11    3.09   0
   0   7  -1   23.01    3.55   0
   0   7  -1   22.28    4.68   0
   0   7   1   20.99    3.72   0
   0   7   1   18.18    4.52   0
   1  -7   1    6.88    2.86   0
  -1  -7  -1    5.37    1.83   0
   1  -7   1    3.67    4.00   0
  -1  -7  -1    9.47    2.79   0
  -1   7  -1    9.08    3.32   0
   1   7   1    9.44    2.68   0
   1   7   1    7.83    3.67   0
   2  -7   1  370.10   24.02   0
   2  -7   1  370.62   24.96   0
   2   7   1  378.68   23.24   0
   2   7   1  389.03   23.75   0
  -2   7  -1  351.57   24.17   0
   3  -7   1  166.65   14.12   0
   3  -7   1  152.15   12.52   0
   3   7   1  167.94   11.20   0
   3   7   1  168.82   10.68   0
   4  -7   1  151.27   12.31   0
   4  -7   1  173.74   14.30   0
   4   7   1  140.52    9.50   0
   4   7   1  136.37    9.17   0
   5  -7   1  199.67   19.01   0
   5  -7   1  219.41   16.81   0
   6  -7   1   60.79   12.44   0
   6  -7   1   27.55    8.27   0
   7  -7   1    2.96    9.86   0
   7  -7   1   19.22   14.93   0
   8  -7   1  -43.69   20.23   0
   8  -7   1   17.66   13.89   0
   8  -8  -1   19.26   21.53   0
   8  -8  -1   12.85   14.98   0
   8   8  -1    1.72    6.04   0
   7  -8  -1   11.35   16.31   0
   7  -8  -1  -10.34   11.28   0
   7   8  -1   14.16    4.47   0
   6  -8  -1  195.20   18.97   0
   6  -8  -1  218.60   22.27   0
   6   8  -1  204.95   13.69   0
   5  -8  -1   -9.74    6.93   0
   5  -8  -1    5.42    9.22   0
   5   8  -1    0.88    2.76   0
   4  -8  -1   -3.26    6.00   0
   4  -8  -1    7.40    7.28   0
   4   8  -1    1.21    2.60   0
   3  -8  -1    2.43    6.02   0
   3  -8  -1    5.45    5.21   0
   3   8  -1    3.49    3.48   0
   3   8  -1    1.70    2.37   0
  -3   8   1    1.36    5.44   0
   2  -8  -1   65.12    9.09   0
   2  -8  -1   78.83    7.99   0
   2   8  -1   75.44    5.95   0
  -2   8   1   71.23    9.20   0
   2   8  -1   61.11    7.09   0
  -1  -8   1  104.63    8.79   0
   1  -8  -1  107.49    8.86   0
  -1  -8   1  114.87    7.87   0
   1  -8  -1  109.73   10.21   0
  -1   8   1   96.83   10.22   0
   1   8  -1  110.30    8.34   0
   1   8  -1  107.93    9.51   0
   0  -8   1   90.20    8.64   0
   0  -8   1   77.31    6.60   0
   0  -8  -1   85.64    8.45   0
   0  -8  -1   78.75    6.70   0
   0   8  -1   79.44    8.69   0
   0   8  -1   78.49    7.31   0
   0   8   1   84.69    8.58   0
   0   8   1   92.55    7.79   0
   1  -8   1   85.84    7.25   0
  -1  -8  -1   83.49    6.05   0
  -1  -8  -1   68.59    6.85   0
   1  -8   1   93.14    9.05   0
   1   8   1   77.21    7.16   0
   1   8   1   83.41    8.13   0
  -1   8  -1   87.76    7.72   0
   2  -8   1   15.24    5.41   0
   2  -8   1   -4.80    3.20   0
   2   8   1   -1.30    3.54   0
  -2   8  -1   -4.01    3.89   0
   2   8   1    4.12    2.88   0
   3  -8   1   10.38    6.23   0
   3  -8   1    5.98    4.86   0
   3   8   1    9.99    3.01   0
   3   8   1   10.71    3.79   0
   4  -8   1   66.19   10.07   0
   4  -8   1   59.23    8.05   0
   4   8   1   60.71    6.26   0
   4   8   1   53.08    5.23   0
   5  -8   1   48.40    8.39   0
   5  -8   1   65.34   10.89   0
   5   8   1   50.07    5.48   0
   5   8   1   45.50    4.68   0
   6  -8   1    5.28    8.29   0
   6  -8   1    5.25   12.03   0
   7  -8   1   78.96   18.82   0
   7  -8   1  105.61   14.03   0
   7  -9  -1   78.53   18.84   0
   7  -9  -1   77.02   14.36   0
   7   9  -1   56.99    6.74   0
   6  -9  -1  141.16   17.39   0
   6  -9  -1  161.91   21.14   0
   6   9  -1  133.46   10.09   0
   5  -9  -1  138.40   15.10   0
   5  -9  -1  135.72   17.20   0
   5   9  -1  132.51    9.79   0
   4  -9  -1  269.71   21.20   0
   4  -9  -1  298.48   22.76   0
   4   9  -1  291.63   18.42   0
   3  -9  -1  104.53   13.24   0
   3  -9  -1  123.98   11.82   0
   3   9  -1  122.42    9.05   0
   3   9  -1  127.26   10.21   0
  -3   9   1  118.53   12.78   0
  -2  -9   1  104.97    7.67   0
   2  -9  -1  111.92   12.38   0
   2  -9  -1  130.91   10.71   0
  -2  -9   1  115.85    7.65   0
   2   9  -1  133.03   10.46   0
   2   9  -1  124.83    9.08   0
  -2   9   1  135.00   12.10   0
  -1  -9   1   14.19    4.12   0
   1  -9  -1   15.43    5.90   0
   1  -9  -1   15.49    4.15   0
  -1  -9   1    6.30    2.75   0
   1   9  -1   10.90    3.67   0
   1   9  -1   16.15    5.05   0
  -1   9   1    6.21    5.45   0
   0  -9   1   42.56    6.26   0
   0  -9   1   35.19    5.03   0
   0  -9  -1   32.97    4.53   0
   0  -9  -1   50.18    6.51   0
   0   9   1   46.58    6.03   0
   0   9   1   49.73    6.98   0
   0   9  -1   48.80    5.66   0
   1  -9   1  122.32   11.28   0
   1  -9   1  113.32    9.41   0
  -1  -9  -1  127.31    8.32   0
  -1  -9  -1  119.08    9.30   0
   1   9   1  108.11    9.51   0
  -1   9  -1  109.97   10.05   0
   1   9   1  108.23   10.40   0
   2  -9   1   69.80    9.43   0
   2  -9   1   78.36    8.02   0
   2   9   1   73.10    7.18   0
  -2   9  -1   63.89    8.85   0
   2   9   1   85.47    8.29   0
   3  -9   1   47.14    7.05   0
   3  -9   1   48.58    8.74   0
   3   9   1   42.57    5.89   0
   3   9   1   42.29    5.96   0
   4  -9   1   -1.03    5.93   0
   4  -9   1    1.49    8.22   0
   4   9   1    1.68    3.60   0
   4   9   1   -5.24    4.22   0
   5  -9   1   28.07   11.66   0
   5  -9   1   19.97    8.01   0
   5   9   1   29.04    5.13   0
   5   9   1   35.67    4.73   0
   6  -9   1   22.17   14.43   0
   6  -9   1   21.66    9.68   0
   7  -9   1  -11.77   18.71   0
   7  -9   1   11.35   11.89   0
   7 -10  -1   21.95   18.87   0
   7 -10  -1   25.95   13.38   0
   7  10  -1   17.04    4.77   0
   6 -10  -1   55.14   11.48   0
   6 -10  -1   92.84   17.09   0
   6  10  -1   53.82    7.25   0
   5 -10  -1   -1.04    8.49   0
   5 -10  -1   20.67   11.62   0
   5  10  -1   -0.53    3.97   0
   4 -10  -1  406.74   31.88   0
   4 -10  -1  446.04   30.32   0
   4  10  -1  460.33   27.90   0
   3 -10  -1   44.03    9.60   0
   3 -10  -1   42.46    7.56   0
   3  10  -1   46.04    5.48   0
   3  10  -1   52.61    6.82   0
  -2 -10   1  191.93   12.37   0
  -2 -10   1  180.64   12.38   0
   2 -10  -1  181.80   16.79   0
   2 -10  -1  201.11   15.01   0
   2  10  -1  206.57   13.73   0
   2  10  -1  191.37   14.88   0
  -2  10   1  196.57   16.54   0
  -1 -10   1  202.78   13.73   0
  -1 -10   1  184.10   12.40   0
   1 -10  -1  191.83   13.46   0
   1 -10  -1  174.39   15.35   0
   1  10  -1  165.79   13.23   0
   1  10  -1  159.99   14.02   0
  -1  10   1  170.85   15.43   0
   0 -10  -1  244.26   15.94   0
   0 -10   1  232.79   17.67   0
   0 -10  -1  222.84   17.21   0
   0 -10   1  227.77   15.89   0
   0  10   1  255.00   17.89   0
   0  10  -1  236.18   16.81   0
   1 -10   1   27.40    4.65   0
  -1 -10  -1   16.28    3.23   0
  -1 -10  -1   20.20    4.60   0
   1 -10   1   18.65    6.71   0
   1  10   1   16.97    5.72   0
   1  10   1   22.30    5.29   0
  -1  10  -1   22.11    5.57   0
   2 -10   1  335.77   24.37   0
   2 -10   1  371.33   22.98   0
   2  10   1  334.62   22.94   0
   2  10   1  321.87   22.28   0
  -2  10  -1  331.37   23.46   0
   3 -10   1   -3.87    7.55   0
   3 -10   1   -4.51    5.47   0
   3  10   1   -6.58    4.15   0
   3  10   1    8.46    5.36   0
   4 -10   1    3.94    6.67   0
   4 -10   1   11.46    9.58   0
   4  10   1    4.75    4.84   0
   4  10   1   12.33    5.63   0
   5 -10   1   32.67   12.88   0
   5 -10   1   29.60    9.20   0
   5  10   1   47.36    6.21   0
   5  10   1   31.33    6.68   0
   6 -10   1    7.43   10.42   0
   6 -10   1   18.38   15.68   0
   6  10   1   15.12    5.88   0
   7 -10   1   -7.19   21.01   0
   7 -10   1   23.16   12.99   0
   7 -11  -1   22.98   21.87   0
   7 -11  -1   42.36   14.01   0
   7  11  -1   23.83    7.00   0
   6 -11  -1   19.62   11.43   0
   6 -11  -1   12.01   15.79   0
   6  11  -1    9.94    5.79   0
   5 -11  -1   56.67   10.35   0
   5 -11  -1   75.35   15.33   0
   5  11  -1   50.79    6.68   0
   4 -11  -1   27.94   10.66   0
   4 -11  -1    8.07    7.50   0
   4  11  -1   -6.05    4.71   0
   3 -11  -1   34.86    7.83   0
   3 -11  -1   27.70    9.83   0
   3  11  -1   43.54    5.73   0
  -2 -11   1   81.98    6.56   0
   2 -11  -1   88.42   11.25   0
  -2 -11   1   74.35    6.30   0
   2 -11  -1   75.97   10.00   0
  -2  11   1   76.97   10.97   0
   2  11  -1   74.88    8.88   0
   2  11  -1   81.43   10.41   0
  -1 -11   1    1.16    5.01   0
   1 -11  -1   -0.55    6.57   0
  -1 -11   1    1.74    3.39   0
   1 -11  -1   -0.60    4.46   0
   1  11  -1    1.16    4.86   0
  -1  11   1   -1.02    7.00   0
   0 -11  -1  737.05   44.14   0
   0 -11  -1  677.59   42.74   0
   0 -11   1  662.13   42.80   0
   0 -11   1  700.36   44.19   0
   0  11  -1  672.60   43.50   0
   0  11   1  670.88   44.42   0
   1 -11   1   17.15    7.06   0
  -1 -11  -1    4.70    4.73   0
  -1 -11  -1    7.13    3.15   0
   1 -11   1    6.83    4.50   0
   1  11   1    5.18    5.54   0
  -1  11  -1   17.11    5.86   0
   1  11   1   10.97    6.43   0
   2 -11   1  108.50   13.99   0
   2 -11   1  121.81   11.33   0
   2  11   1  113.57   12.14   0
   2  11   1  124.49   11.37   0
   3 -11   1  224.32   17.36   0
   3 -11   1  231.13   19.93   0
   3  11   1  222.69   17.09   0
   3  11   1  216.95   16.33   0
   4 -11   1   23.50   11.16   0
   4 -11   1   16.96    7.30   0
   4  11   1   12.39    6.05   0
   4  11   1   -1.02    6.68   0
   5 -11   1    4.59   13.13   0
   5 -11   1    6.38    9.40   0
   5  11   1   36.15    7.25   0
   5  11   1   21.84    7.54   0
   6 -11   1   55.41   13.10   0
   6 -11   1   38.27   17.64   0
   7 -11   1   60.20   15.02   0
   7 -11   1   53.81   23.49   0
   6 -12  -1   26.81   12.41   0
   6 -12  -1   -7.61   17.16   0
   6  12  -1   19.56    8.36   0
   5 -12  -1   23.36   15.29   0
   5 -12  -1   26.08   11.06   0
   5  12  -1   38.96    7.31   0
   4 -12  -1   -0.46   11.58   0
   4 -12  -1    1.01    8.12   0
   4  12  -1   10.50    6.17   0
   3 -12  -1   24.16   10.47   0
   3 -12  -1   30.80    8.72   0
   3  12  -1   36.69    6.78   0
  -2 -12   1  259.97   16.72   0
   2 -12  -1  266.33   22.08   0
  -2 -12   1  248.28   16.75   0
   2 -12  -1  268.44   19.39   0
   2  12  -1  275.99   19.03   0
  -2  12   1  241.00   21.28   0
  -1 -12   1    6.20    5.79   0
   1 -12  -1   -4.12    7.47   0
   1 -12  -1   10.88    5.48   0
  -1 -12   1   -4.25    3.77   0
  -1  12   1    5.37    8.21   0
   1  12  -1   -2.19    5.99   0
   0 -12   1  173.75   15.71   0
   0 -12  -1  158.40   15.38   0
   0 -12   1  175.80   13.36   0
   0 -12  -1  183.49   13.30   0
   0  12   1  185.87   16.62   0
   0  12  -1  193.31   15.51   0
   1 -12   1  135.69   11.78   0
  -1 -12  -1  133.79   11.68   0
  -1 -12  -1  127.15    9.94   0
   1 -12   1  118.69   14.25   0
   1  12   1  122.69   13.52   0
  -1  12  -1  128.52   13.38   0
   2 -12   1    1.65    6.04   0
   2 -12   1   -2.94    8.51   0
   2  12   1   -1.92    7.16   0
   2  12   1   -0.92    6.35   0
   3 -12   1  100.97   12.24   0
   3 -12   1   97.49   13.97   0
   3  12   1   77.61   11.41   0
   3  12   1   85.20   11.95   0
   4 -12   1   18.49    8.67   0
   4 -12   1   28.65   12.89   0
   4  12   1   24.33    8.41   0
   4  12   1   37.15    8.17   0
   5 -12   1   23.20   14.89   0
   5 -12   1    7.23   10.44   0
   5  12   1   29.42    9.24   0
   6 -12   1   25.93   19.21   0
   6 -12   1   10.26   12.57   0
   6 -13  -1   -9.15   19.71   0
   6 -13  -1  -22.91   13.36   0
   6  13  -1   -6.39   10.15   0
   5 -13  -1    4.03   15.57   0
   5 -13  -1   -9.72   10.77   0
   5  13  -1    6.34    8.84   0
   4 -13  -1   25.74   13.90   0
   4 -13  -1   26.69   10.53   0
   4  13  -1   40.30    8.70   0
   3 -13  -1   -0.28   11.40   0
   3 -13  -1    6.02    8.21   0
   3  13  -1    6.38    7.24   0
  -2 -13   1   20.87    4.33   0
   2 -13  -1   16.29    7.38   0
  -2 -13   1   22.77    4.03   0
   2 -13  -1   18.56   10.08   0
  -2  13   1   21.66   10.16   0
   2  13  -1   29.77    7.46   0
   1 -13  -1    0.89    5.81   0
  -1 -13   1    0.63    4.29   0
   1 -13  -1   12.61    8.71   0
  -1 -13   1   -8.92    6.26   0
   1  13  -1    7.21    6.86   0
  -1  13   1   13.24    9.55   0
   0 -13   1   51.08    6.88   0
   0 -13  -1   44.88    6.61   0
   0 -13  -1   46.69    8.90   0
   0 -13   1   60.03    9.70   0
   0  13  -1   52.76    8.71   0
   0  13   1   54.89   10.67   0
   1 -13   1   81.90   10.33   0
  -1 -13  -1   83.04    8.04   0
   1 -13   1   86.44   12.03   0
  -1 -13  -1   72.49    9.92   0
  -1  13  -1   93.80   11.48   0
   1  13   1   81.04   11.56   0
   2 -13   1   34.22    7.55   0
   2 -13   1   25.06   10.36   0
   2  13   1   37.26    9.49   0
   3 -13   1    9.47   11.21   0
   3 -13   1    8.29    8.57   0
   3  13   1   13.14    8.40   0
   3  13   1    8.81    8.65   0
   4 -13   1   29.93   13.24   0
   4 -13   1   33.33   10.25   0
   4  13   1   22.72   10.07   0
   5 -13   1   58.00   12.82   0
   5 -13   1   78.66   18.18   0
   5  13   1   29.84   11.24   0
   6 -13   1   89.87   22.17   0
   6 -13   1   32.65   14.45   0
   5 -14  -1   21.49   17.19   0
   5  14  -1  -11.09   10.91   0
   4 -14  -1   19.85   11.04   0
   4 -14  -1   25.47   15.66   0
   4  14  -1  -14.85    9.79   0
   3 -14  -1   -0.39   12.87   0
   3 -14  -1   -4.79    8.25   0
   3  14  -1    4.00    8.91   0
  -2 -14   1   50.23    5.99   0
   2 -14  -1   41.17   12.76   0
  -2 -14   1   51.30    6.22   0
   2 -14  -1   48.56    9.28   0
   2  14  -1   43.58    9.47   0
   1 -14  -1    4.10    9.58   0
   1 -14  -1    1.22    6.60   0
  -1 -14   1    5.22    7.44   0
  -1 -14   1   -0.02    5.34   0
   1  14  -1    1.29    8.41   0
  -1  14   1    4.24   10.96   0
   0 -14  -1   14.02    8.87   0
   0 -14   1   15.81    5.96   0
   0 -14  -1   17.35    5.71   0
   0 -14   1   -4.24    8.47   0
   0  14  -1   21.23    9.19   0
   0  14   1   16.40   10.24   0
  -1 -14  -1   -1.44    6.74   0
  -1 -14  -1    7.54    4.88   0
   1 -14   1   -6.84    6.78   0
   1 -14   1   -1.46    9.71   0
   1  14   1   10.26    9.61   0
   2 -14   1   39.96   12.63   0
   2 -14   1   46.63    8.98   0
   2  14   1   22.15   10.51   0
   3 -14   1   -1.37    9.27   0
   3 -14   1  -15.40   13.28   0
   3  14   1    5.25   10.07   0
   4 -14   1    7.51   11.23   0
   4 -14   1   13.17   15.45   0
   4  14   1   -2.16   11.24   0
   5 -14   1   44.78   20.11   0
   5 -14   1   43.44   14.04   0
   5 -15  -1   31.37   14.11   0
   5 -15  -1    7.00   18.66   0
   5  15  -1   16.83   13.78   0
   4 -15  -1   21.62   17.38   0
   4 -15  -1    2.20   12.03   0
   4  15  -1   11.54   12.09   0
   3 -15  -1   18.37   10.14   0
   3 -15  -1  -24.83   14.43   0
   3  15  -1   -6.44   10.74   0
  -2 -15   1   -2.79    4.27   0
   2 -15  -1  -12.49   12.84   0
   2 -15  -1    7.38    8.81   0
   2  15  -1   10.20   10.16   0
  -1 -15   1    9.41    6.13   0
  -1 -15   1    7.23    8.38   0
   1 -15  -1   15.65    7.80   0
   1 -15  -1   -4.29   10.96   0
   1  15  -1   20.08   10.70   0
  -1  15   1   20.79   12.65   0
   0 -15  -1   18.45   10.00   0
   0 -15   1   11.62    6.97   0
   0 -15  -1    4.51    6.19   0
   0 -15   1   34.63   10.58   0
   0  15  -1   16.43   11.14   0
   0  15   1   22.43   11.68   0
  -1 -15  -1   29.02    8.19   0
   1 -15   1   19.85   11.31   0
   1 -15   1   28.17    8.73   0
  -1 -15  -1    8.05    5.42   0
   1  15   1   20.35   12.17   0
   2 -15   1   16.08   13.20   0
   2 -15   1   -9.29    9.09   0
   2  15   1   -0.70   11.36   0
   3 -15   1  -12.29   10.16   0
   3 -15   1   14.41   14.97   0
   3  15   1  -12.08   11.59   0
   4 -15   1   13.12   12.84   0
   5 -15   1   31.49   19.86   0
   4 -16  -1   39.03   15.24   0
   4 -16  -1   25.65   19.58   0
   4  16  -1   34.67   15.15   0
   3 -16  -1    6.62   12.54   0
   3 -16  -1   -8.15   16.68   0
   3  16  -1   28.62   13.32   0
   2 -16  -1    6.54   10.26   0
   2 -16  -1    9.76   14.02   0
   2  16  -1    0.30   12.74   0
  -1 -16   1   56.12   10.51   0
   1 -16  -1   46.02   13.94   0
   1 -16  -1   37.09    9.64   0
  -1 -16   1   44.95    8.10   0
   1  16  -1   63.61   14.13   0
   0 -16   1   28.01   11.67   0
   0 -16   1   -1.44    7.79   0
   0 -16  -1  -16.66    6.93   0
   0 -16  -1  -12.52   10.67   0
   0  16   1  -14.93   13.01   0
  -1 -16  -1    0.07    6.17   0
   1 -16   1   16.43   13.00   0
  -1 -16  -1    5.59    8.95   0
   1 -16   1    1.12    8.64   0
   1  16   1  -10.39   12.81   0
   2 -16   1   19.72   11.10   0
   2 -16   1    0.33   14.38   0
   2  16   1   -1.07   13.38   0
   3 -16   1   75.15   18.92   0
   3 -16   1   66.42   14.40   0
   3  16   1   52.25   15.69   0
   4 -16   1  -15.84   13.91   0
   4 -16   1  -19.52   20.40   0
   3 -17  -1   23.03   18.48   0
   3 -17  -1   31.46   15.03   0
   3  17  -1    4.09   16.59   0
   2 -17  -1   30.90   12.61   0
   2 -17  -1   28.14   18.38   0
   2  17  -1    1.57   15.61   0
   1 -17  -1   11.05   10.15   0
  -1 -17   1  -10.48    8.14   0
  -1 -17   1   15.00   10.91   0
   1 -17  -1  -21.11   14.99   0
   0 -17  -1   -4.26   12.25   0
   0 -17   1   -5.64   12.92   0
   0 -17   1  -12.10    8.91   0
   0 -17  -1   -9.79    8.02   0
  -1 -17  -1   85.98   12.13   0
  -1 -17  -1   69.69    9.52   0
   1 -17   1   87.72   17.67   0
   1 -17   1   78.65   12.50   0
   2 -17   1   31.81   17.22   0
   2 -17   1   -7.92   12.09   0
   3 -17   1   -6.42   19.49   0
   3 -17   1   -2.29   16.08   0
   1 -18  -1   19.61   11.69   0
   1 -18  -1  -20.53   17.80   0
  -1 -18   1   26.09   12.78   0
  -1 -18   1   23.80    9.85   0
   0 -18   1    0.55   15.75   0
   0 -18  -1   65.38   15.36   0
   0 -18  -1   21.00   10.44   0
   0 -18   1   53.08   11.46   0
   1 -18   1    0.70   18.04   0
  -1 -18  -1   18.97   11.16   0
   1 -18   1    5.52   12.23   0
  -1 -18  -1  -14.24    8.45   0
   9   0  -2   -8.37   19.27   0
   8   0  -2  -35.68   12.40   0
   7   0  -2   85.08   11.67   0
   6   0  -2   31.20    7.14   0
   5   0  -2  116.00   10.19   0
   4   0  -2  361.59   23.29   0
   3   0  -2  542.13   33.67   0
   2   0  -2 3144.77  192.95   0
  -2   0   2 3247.18  192.86   0
  -1   0   2  409.67   24.95   0
   1   0  -2  396.61   24.93   0
   0   0   2 1427.56   87.62   0
   0   0  -2 1471.40   87.62   0
  -1   0  -2  988.50   61.13   0
   1   0   2 1034.73   61.21   0
   2   0   2   91.29    6.14   0
   3   0   2  124.24    8.37   0
   4   0   2  109.82    8.06   0
   5   0   2  151.57   10.99   0
   6   0   2  108.30    9.75   0
   7   0   2   40.56    7.28   0
   7   0   2   51.32    9.96   0
   8   0   2   30.05    9.18   0
   8   0   2   19.35   13.21   0
   9  -1  -2  -18.95   19.92   0
   9   1  -2    9.24   18.99   0
   8  -1  -2   15.40   13.63   0
   8   1  -2    9.41   12.82   0
   7  -1  -2   12.52    9.22   0
   7   1  -2    2.90    8.33   0
   6  -1  -2   16.48    6.91   0
   6   1  -2    4.03    6.04   0
   5  -1  -2  140.35   11.72   0
   5   1  -2  140.65   11.14   0
   4  -1  -2 1908.61  116.94   0
   4   1  -2 1933.91  116.57   0
   3  -1  -2   90.81    7.42   0
   3   1  -2   83.91    6.61   0
  -3   1   2   83.34    6.82   0
  -2  -1   2 4510.66  268.02   0
   2  -1  -2 4468.02  268.47   0
   2   1  -2 4497.65  268.21   0
  -2   1   2 4318.38  268.38   0
  -1  -1   2  452.04   27.70   0
   1  -1  -2  464.63   27.98   0
   1   1  -2  434.59   27.68   0
  -1   1   2  453.39   27.96   0
   0  -1  -2    6.72    1.74   0
   0  -1   2    5.27    1.62   0
   0   1  -2    6.19    1.49   0
   0   1   2    6.28    1.77   0
  -1  -1  -2   28.19    2.27   0
   1  -1   2   31.92    2.88   0
   1   1   2   26.06    2.64   0
  -1   1  -2   29.25    2.82   0
   2  -1   2  340.52   21.45   0
   2   1   2  322.27   21.17   0
  -2   1  -2  379.04   21.48   0
   3  -1   2   39.55    4.27   0
   3   1   2   47.17    3.70   0
   4  -1   2   80.32    6.98   0
   4   1   2   88.26    6.38   0
   5  -1   2   64.82    6.82   0
   5   1   2   55.64    6.02   0
   6  -1   2   42.83    6.00   0
   6   1   2   31.78    5.27   0
   7  -1   2   23.79   10.06   0
   7  -1   2   47.48    7.68   0
   7   1   2   40.90    6.90   0
   7   1   2   37.33    8.82   0
   8  -1   2   41.69    9.89   0
   8  -1   2   41.28   14.48   0
   8   1   2   17.42   13.02   0
   8   1   2   48.06    9.07   0
   8  -2  -2   24.68   14.13   0
   8  -2  -2   39.62   12.00   0
   8   2  -2   13.09   12.86   0
   7  -2  -2   99.37   12.63   0
   7   2  -2   62.73   10.56   0
   6  -2  -2  519.78   33.55   0
   6   2  -2  479.49   32.15   0
   5  -2  -2   30.54    6.24   0
   5   2  -2   24.09    4.65   0
   4  -2  -2 2579.17  157.07   0
   4   2  -2 2590.75  156.31   0
   3  -2  -2   33.71    4.71   0
  -3   2   2   24.84    4.12   0
   3   2  -2   25.71    3.64   0
   2  -2  -2    8.57    3.13   0
  -2  -2   2    8.92    1.61   0
   2   2  -2    7.51    1.98   0
  -2   2   2    8.72    3.00   0
  -1  -2   2   16.28    2.27   0
   1  -2  -2   13.11    3.18   0
  -1   2   2   13.75    3.09   0
   1   2  -2   18.40    2.27   0
   0  -2  -2 2194.14  130.48   0
   0  -2   2 2151.62  130.39   0
   0   2  -2 2162.32  130.36   0
   0   2   2 2128.58  130.51   0
  -1  -2  -2   23.45    2.07   0
   1  -2   2   30.57    3.07   0
   2  -2   2   55.35    4.67   0
   2   2   2   52.97    3.78   0
  -2   2  -2   63.93    4.78   0
   3  -2   2   13.92    2.81   0
   3   2   2   14.09    1.89   0
   4  -2   2    5.46    3.14   0
   4   2   2    4.80    1.99   0
   5  -2   2   43.14    5.48   0
   5   2   2   43.87    5.00   0
   6  -2   2   64.69    8.96   0
   6  -2   2   85.56   10.46   0
   6   2   2   72.18    7.26   0
   7  -2   2  -15.23    9.48   0
   7  -2   2   11.87    6.89   0
   7   2   2   -1.66    5.18   0
   8  -2   2   -1.16   14.93   0
   8  -2   2    3.29    9.61   0
   8   2   2   -7.13   11.35   0
   8   2   2    7.04    7.42   0
   8  -3  -2   76.66   16.54   0
   8  -3  -2   90.41   13.99   0
   8   3  -2   77.04   13.71   0
   7  -3  -2   26.98   11.09   0
   7   3  -2   24.90    8.54   0
   6  -3  -2  287.77   22.49   0
   6   3  -2  303.93   20.38   0
   5  -3  -2  184.87   14.71   0
   5   3  -2  169.05   12.34   0
   4  -3  -2   43.81    6.39   0
   4   3  -2   37.69    4.48   0
   3  -3  -2  104.85    9.33   0
  -3   3   2  115.23    9.08   0
   3   3  -2  112.59    7.69   0
   2  -3  -2  119.00    9.23   0
   2   3  -2  115.14    7.73   0
  -2   3   2  115.42    9.00   0
   1  -3  -2    5.21    2.88   0
  -1  -3   2    2.32    1.73   0
  -1   3   2    2.63    2.86   0
   1   3  -2    2.12    1.59   0
   0  -3  -2  195.75   13.41   0
   0  -3   2  217.32   13.20   0
   0   3   2  197.60   13.57   0
   0   3  -2  211.72   13.14   0
   1  -3   2  240.12   15.19   0
  -1  -3  -2  251.46   14.71   0
  -1   3  -2  232.76   15.18   0
   1   3   2  232.61   15.01   0
   2  -3   2    1.02    2.03   0
   2   3   2   -0.77    0.98   0
  -2   3  -2    2.79    2.15   0
   3  -3   2    3.59    2.75   0
   3   3   2    3.83    0.97   0
   4  -3   2  369.67   22.21   0
   4   3   2  320.88   20.98   0
   5  -3   2  129.46   11.90   0
   5  -3   2  125.30   10.23   0
   5   3   2  109.74    8.20   0
   6  -3   2   13.53    8.82   0
   6  -3   2   13.63    6.01   0
   6   3   2   24.07    3.93   0
   7  -3   2   94.36   12.76   0
   7  -3   2  120.30   14.68   0
   7   3   2  102.80    9.61   0
   8  -3   2   -0.09   15.66   0
   8  -3   2   16.51   10.36   0
   8   3   2    4.15   10.80   0
   8   3   2   -8.66    6.93   0
   8  -4  -2   12.57   12.42   0
   8  -4  -2   16.14   16.30   0
   8   4  -2   -3.45   11.59   0
   7  -4  -2   56.06   12.86   0
   7  -4  -2   56.98   11.38   0
   7   4  -2   57.60    9.13   0
   6  -4  -2   50.78   10.18   0
   6   4  -2   65.81    8.32   0
   5  -4  -2   60.74    8.60   0
   5   4  -2   51.78    6.08   0
   4  -4  -2   60.31    8.28   0
   4   4  -2   52.11    4.94   0
   3  -4  -2  214.83   15.24   0
   3   4  -2  203.96   13.25   0
  -3   4   2  209.93   14.96   0
   2  -4  -2  115.11    9.48   0
   2   4  -2  123.20    7.82   0
  -2   4   2  103.19    9.19   0
  -1  -4   2  345.44   20.84   0
   1  -4  -2  344.89   21.72   0
  -1  -4   2  316.11   20.93   0
  -1   4   2  321.79   21.66   0
   1   4  -2  345.23   20.82   0
   0  -4  -2  108.26    8.00   0
   0  -4  -2  108.17    8.18   0
   0  -4   2  111.13    7.65   0
   0   4  -2  112.96    7.63   0
   0   4   2  113.72    8.43   0
  -1  -4  -2   19.84    2.20   0
  -1  -4  -2   18.10    2.46   0
   1  -4   2   26.81    3.06   0
   1   4   2   26.65    3.14   0
  -1   4  -2   28.85    3.18   0
   2  -4   2  175.44   11.36   0
  -2   4  -2  194.93   11.51   0
   2   4   2  139.90   10.51   0
   3  -4   2  449.71   28.36   0
   4  -4   2  172.39   12.80   0
   4  -4   2  186.58   14.17   0
   5  -4   2   17.88    5.24   0
   5  -4   2   10.32    7.25   0
   5   4   2   15.03    2.36   0
   6  -4   2    7.04    5.92   0
   6  -4   2    4.22    8.47   0
   7  -4   2   76.01   10.64   0
   7  -4   2   72.88   13.65   0
   7   4   2   76.57    7.71   0
   8  -4   2   11.27   10.75   0
   8  -4   2   31.77   17.57   0
   8   4   2    0.82   10.47   0
   8   4   2    6.50    6.57   0
   8  -5  -2   53.43   17.94   0
   8  -5  -2   32.88   13.52   0
   7  -5  -2   -4.92    9.63   0
   7  -5  -2    4.65   11.77   0
   7   5  -2    4.71    6.93   0
   6  -5  -2   54.65   10.08   0
   6  -5  -2   41.41   10.53   0
   6   5  -2   56.20    7.65   0
   5  -5  -2   58.47    9.48   0
   5   5  -2   57.17    5.79   0
   4  -5  -2   84.30    9.27   0
   4   5  -2   56.55    5.11   0
   3  -5  -2    8.54    4.70   0
   3   5  -2   -1.02    1.88   0
  -3   5   2    0.01    4.10   0
   2  -5  -2   58.67    7.36   0
   2   5  -2   68.52    5.08   0
  -2   5   2   54.12    7.01   0
   1  -5  -2   10.07    3.56   0
  -1  -5   2    4.79    2.02   0
  -1  -5   2    5.84    2.65   0
   1  -5  -2    3.94    3.53   0
  -1   5   2   12.35    4.04   0
   1   5  -2    6.99    2.14   0
   0  -5  -2  372.39   22.75   0
   0  -5   2  344.25   22.19   0
   0  -5   2  357.16   22.70   0
   0  -5  -2  358.87   22.33   0
   0   5  -2  347.40   22.26   0
   0   5   2  355.87   22.90   0
   1  -5   2  292.91   19.17   0
  -1  -5  -2  298.10   18.10   0
   1  -5   2  277.74   18.45   0
  -1  -5  -2  282.85   17.86   0
   1   5   2  314.30   18.73   0
  -1   5  -2  275.70   18.51   0
   2  -5   2  412.59   26.68   0
   2  -5   2  454.48   27.54   0
   2   5   2  411.33   26.20   0
  -2   5  -2  423.64   26.79   0
   3  -5   2   81.59    7.24   0
   3  -5   2   75.27    8.52   0
   4  -5   2   57.09    6.57   0
   4  -5   2   56.45    8.10   0
   5  -5   2   15.84    5.59   0
   5  -5   2    0.68    7.43   0
   6  -5   2   -4.99    6.41   0
   6  -5   2   -4.28    9.40   0
   6   5   2    0.83    2.42   0
   7  -5   2  -22.99   12.87   0
   7  -5   2    8.41    8.88   0
   7   5   2   -1.71    3.77   0
   8  -5   2   -7.34   11.71   0
   8  -5   2   36.38   18.34   0
   8   5   2   13.99    6.05   0
   8   5   2    9.50    9.80   0
   8  -6  -2  -17.53   14.23   0
   8  -6  -2  -30.55   17.97   0
   8   6  -2   -1.53    9.31   0
   7  -6  -2  -17.71   10.27   0
   7  -6  -2  -12.91   13.23   0
   7   6  -2    1.25    6.29   0
   6  -6  -2   26.09   10.48   0
   6  -6  -2   20.70    8.85   0
   6   6  -2    9.31    4.45   0
   5  -6  -2    9.28    6.69   0
   5  -6  -2   -6.92    7.85   0
   5   6  -2    3.94    3.01   0
   4  -6  -2   21.15    6.63   0
   4  -6  -2   14.51    6.73   0
   4   6  -2   18.58    3.00   0
  -4   6   2   17.93    5.69   0
   3  -6  -2  185.02   14.41   0
   3  -6  -2  205.39   15.19   0
  -3   6   2  184.68   14.65   0
   3   6  -2  194.63   12.51   0
   2  -6  -2   -1.13    3.88   0
  -2  -6   2    2.52    1.28   0
  -2  -6   2    2.96    1.24   0
   2  -6  -2    3.57    4.26   0
  -2   6   2    2.70    4.33   0
   2   6  -2    2.50    2.01   0
   1  -6  -2  675.15   43.69   0
   1  -6  -2  723.84   44.29   0
  -1  -6   2  724.70   43.25   0
  -1  -6   2  721.51   43.57   0
  -1   6   2  685.06   44.24   0
   1   6  -2  702.64   43.28   0
   0  -6   2    9.05    2.48   0
   0  -6  -2    6.66    2.55   0
   0  -6   2   13.14    3.72   0
   0  -6  -2   10.50    3.61   0
   0   6   2    9.99    3.95   0
   0   6  -2    8.62    2.46   0
   1  -6   2   18.93    4.56   0
  -1  -6  -2   14.25    2.57   0
  -1  -6  -2   13.76    2.00   0
   1  -6   2   14.33    2.96   0
  -1   6  -2   19.70    3.55   0
   1   6   2   17.93    3.73   0
   2  -6   2    3.78    4.36   0
   2  -6   2   -0.32    2.87   0
   2   6   2   -1.24    2.58   0
  -2   6  -2    2.64    3.07   0
   3  -6   2    5.50    3.66   0
   3  -6   2    7.49    5.08   0
   3   6   2    8.80    2.28   0
   4  -6   2   29.26    7.15   0
   4  -6   2   28.99    5.41   0
   4   6   2   17.37    2.36   0
   5  -6   2   71.42    8.43   0
   5  -6   2   55.09   10.61   0
   6  -6   2   11.17   10.54   0
   6  -6   2   20.47    7.55   0
   7  -6   2  -12.34   14.15   0
   7  -6   2   -0.39    9.24   0
   7   6   2   -0.60    3.38   0
   8  -6   2   18.13   12.89   0
   8  -6   2   14.34   20.81   0
   8   6   2    1.97    9.48   0
   8   6   2    3.41    5.72   0
   8  -7  -2    4.99   19.92   0
   8  -7  -2   32.20   16.08   0
   8   7  -2   16.43    8.12   0
   7  -7  -2   11.30   11.17   0
   7  -7  -2    0.64   14.30   0
   7   7  -2    9.19    5.72   0
   6  -7  -2    6.39   11.00   0
   6  -7  -2    8.59    8.88   0
   6   7  -2    2.74    4.07   0
   5  -7  -2   17.37    7.37   0
   5  -7  -2   14.16    9.02   0
   5   7  -2    3.86    3.30   0
   4  -7  -2   29.96    7.11   0
   4  -7  -2   31.04    7.48   0
  -4   7   2   31.11    6.95   0
   4   7  -2   24.87    3.54   0
   3  -7  -2   81.16   10.37   0
   3  -7  -2   82.50    9.51   0
   3   7  -2   90.20    6.74   0
  -3   7   2   89.04   10.13   0
  -2  -7   2   27.64    3.04   0
   2  -7  -2   28.10    6.04   0
  -2  -7   2   34.88    3.40   0
   2  -7  -2   42.37    5.63   0
   2   7  -2   29.35    4.05   0
  -2   7   2   26.45    5.98   0
   1  -7  -2  289.68   20.50   0
   1  -7  -2  334.71   21.42   0
  -1  -7   2  314.66   19.89   0
  -1  -7   2  309.60   20.44   0
   1   7  -2  315.02   20.00   0
  -1   7   2  323.68   21.36   0
   0  -7  -2  117.15    9.45   0
   0  -7   2  111.21    8.31   0
   0  -7   2  119.37    9.76   0
   0  -7  -2  115.07    8.54   0
   0   7   2  110.77    9.61   0
   0   7  -2  110.78    8.57   0
   1  -7   2  294.51   20.05   0
  -1  -7  -2  307.99   19.79   0
   1  -7   2  326.39   21.11   0
  -1  -7  -2  306.70   19.36   0
  -1   7  -2  314.09   20.29   0
   1   7   2  322.81   20.55   0
   2  -7   2   20.63    4.03   0
   2  -7   2   18.13    5.31   0
  -2   7  -2   25.31    4.35   0
   2   7   2   18.17    4.02   0
   3  -7   2    2.81    3.97   0
   3  -7   2    3.25    5.64   0
   3   7   2    9.38    3.14   0
   4  -7   2   -0.46    6.74   0
   4  -7   2   -6.62    4.85   0
   4   7   2    0.92    2.55   0
   5  -7   2    8.53    9.16   0
   5  -7   2   -2.04    6.01   0
   6  -7   2  -18.66   11.74   0
   6  -7   2  -13.66    7.45   0
   7  -7   2    6.13   10.15   0
   7  -7   2   59.45   15.88   0
   8  -7   2    9.90   22.21   0
   8  -8  -2   48.04   22.75   0
   8  -8  -2   33.68   16.42   0
   8   8  -2   32.68    8.43   0
   7  -8  -2   89.40   14.34   0
   7  -8  -2   65.35   17.22   0
   7   8  -2   68.54    9.65   0
   6  -8  -2   58.56   13.83   0
   6  -8  -2   69.66   11.74   0
   6   8  -2   44.61    6.00   0
   5  -8  -2   10.22    9.43   0
   5  -8  -2   -3.80    7.09   0
   5   8  -2   -0.99    3.40   0
   4  -8  -2   -0.34    7.15   0
   4  -8  -2   -5.60    5.82   0
   4   8  -2    3.01    2.92   0
  -4   8   2   11.36    7.19   0
   3  -8  -2   16.43    5.58   0
   3  -8  -2   17.47    6.91   0
   3   8  -2   19.02    3.27   0
  -3   8   2   15.97    6.59   0
   2  -8  -2   -1.48    4.18   0
  -2  -8   2   -0.64    2.15   0
  -2  -8   2   -0.65    2.03   0
   2  -8  -2    3.04    5.10   0
   2   8  -2   -0.93    2.55   0
  -2   8   2    2.26    4.93   0
   1  -8  -2    4.72    3.72   0
  -1  -8   2    5.92    3.92   0
   1  -8  -2    9.91    5.23   0
  -1  -8   2    8.80    2.76   0
  -1   8   2    1.17    4.49   0
   1   8  -2    9.50    3.08   0
   0  -8  -2   62.18    6.01   0
   0  -8   2   67.12    7.58   0
   0  -8   2   62.17    5.89   0
   0  -8  -2   63.03    7.53   0
   0   8   2   68.70    7.71   0
   0   8  -2   63.73    6.35   0
   1  -8   2  138.98   11.88   0
  -1  -8  -2  135.24   10.01   0
  -1  -8  -2  131.08    9.31   0
   1  -8   2  153.01   10.46   0
   1   8   2  147.80   11.29   0
  -1   8  -2  132.60   10.73   0
   2  -8   2  159.55   13.57   0
   2  -8   2  155.55   11.96   0
   2   8   2  163.97   12.05   0
  -2   8  -2  162.70   12.35   0
   3  -8   2    2.90    4.58   0
   3  -8   2    9.19    6.48   0
   3   8   2   -3.01    3.50   0
   4  -8   2    1.16    5.53   0
   4  -8   2   11.38    7.90   0
   4   8   2    0.01    3.62   0
   5  -8   2    7.85    6.93   0
   5  -8   2   10.32   10.04   0
   5   8   2    7.87    3.62   0
   6  -8   2   -8.13    7.94   0
   6  -8   2    1.39   13.22   0
   7  -8   2   28.40   17.25   0
   7  -9  -2   35.22   17.38   0
   7  -9  -2    0.96   13.20   0
   7   9  -2   19.34    5.76   0
   6  -9  -2  204.05   20.86   0
   6  -9  -2  204.50   23.82   0
   6   9  -2  215.42   14.96   0
   5  -9  -2   -1.92   10.21   0
   5  -9  -2    3.97    8.30   0
   5   9  -2   15.56    4.10   0
   4  -9  -2   -2.78    8.19   0
   4  -9  -2    0.90    7.11   0
   4   9  -2    8.06    3.48   0
   3  -9  -2    4.43    7.06   0
   3  -9  -2    6.30    5.98   0
  -3   9   2    4.53    6.76   0
   3   9  -2    2.59    3.07   0
   2  -9  -2   18.85    6.41   0
  -2  -9   2    2.57    2.67   0
   2  -9  -2   -0.95    4.57   0
  -2  -9   2    5.91    2.58   0
   2   9  -2    7.02    3.29   0
  -2   9   2    3.01    5.89   0
  -1  -9   2   27.85    5.02   0
   1  -9  -2   25.85    6.39   0
  -1  -9   2   20.17    3.68   0
   1  -9  -2   25.74    4.79   0
  -1   9   2   25.00    6.51   0
   1   9  -2   22.55    4.13   0
   0  -9   2   40.89    6.35   0
   0  -9  -2   37.89    4.81   0
   0  -9   2   37.56    4.78   0
   0  -9  -2   31.98    5.85   0
   0   9  -2   50.92    5.71   0
   0   9   2   37.46    6.86   0
   1  -9   2   -4.56    3.16   0
   1  -9   2    0.37    5.12   0
  -1  -9  -2   -2.82    3.38   0
  -1  -9  -2    0.64    2.27   0
   1   9   2   -1.46    4.75   0
  -1   9  -2   -0.36    3.81   0
   2  -9   2   64.07    8.73   0
   2  -9   2   48.54    7.23   0
   2   9   2   57.17    7.00   0
  -2   9  -2   70.36    7.69   0
   3  -9   2    5.67    4.75   0
   3  -9   2   -5.05    6.93   0
   3   9   2    7.27    4.64   0
   4  -9   2   12.94    8.80   0
   4  -9   2    0.53    5.63   0
   4   9   2    1.64    4.64   0
   5  -9   2   -7.43   10.78   0
   5  -9   2  -13.95    6.99   0
   5   9   2    0.46    4.69   0
   6  -9   2   10.18    9.48   0
   6  -9   2   39.03   14.35   0
   6   9   2    1.17    5.07   0
   7  -9   2   31.60   12.83   0
   7  -9   2   -2.50   18.97   0
   7 -10  -2   78.47   20.21   0
   7 -10  -2   36.41   14.32   0
   7  10  -2   29.64    6.37   0
   6 -10  -2   74.47   16.17   0
   6 -10  -2   71.66   13.18   0
   6  10  -2   77.56    8.78   0
   5 -10  -2    3.65   11.75   0
   5 -10  -2   -3.32    8.39   0
   5  10  -2    7.55    4.45   0
   4 -10  -2   51.23   10.75   0
   4 -10  -2   13.66    8.07   0
   4  10  -2   40.77    5.18   0
   3 -10  -2  105.45   13.49   0
   3 -10  -2   72.82    9.70   0
  -3  10   2   98.50   11.78   0
   3  10  -2   86.60    8.11   0
  -2 -10   2    1.18    2.88   0
  -2 -10   2   -3.29    3.15   0
   2 -10  -2   -0.70    7.05   0
   2 -10  -2   -2.69    5.30   0
   2  10  -2    6.35    3.78   0
  -2  10   2    5.05    6.69   0
  -1 -10   2  -11.15    4.36   0
   1 -10  -2    7.25    4.45   0
  -1 -10   2   -1.51    3.13   0
   1 -10  -2   -6.57    5.89   0
   1  10  -2    6.84    4.00   0
  -1  10   2    2.26    6.29   0
   0 -10  -2   -1.58    3.20   0
   0 -10   2   -1.04    5.52   0
   0 -10  -2   -0.33    5.06   0
   0 -10   2    3.61    3.53   0
   0  10   2    1.24    5.18   0
   0  10  -2   -1.87    4.23   0
  -1 -10  -2  247.59   15.82   0
   1 -10   2  254.21   16.95   0
  -1 -10  -2  244.78   16.67   0
   1 -10   2  241.95   18.83   0
  -1  10  -2  231.48   17.42   0
   1  10   2  234.48   17.91   0
   2 -10   2   43.29    8.43   0
   2 -10   2   44.62    6.70   0
   2  10   2   41.59    6.94   0
  -2  10  -2   51.04    7.30   0
   3 -10   2    9.89    7.84   0
   3 -10   2    2.26    5.68   0
   3  10   2   -1.45    5.20   0
   4 -10   2   30.50    7.55   0
   4 -10   2   27.92    9.93   0
   4  10   2   25.07    6.28   0
   5 -10   2    4.16    7.91   0
   5 -10   2   52.35   13.17   0
   5  10   2   17.22    6.41   0
   6 -10   2    3.16    9.62   0
   6 -10   2   20.24   16.64   0
   6  10   2   -3.10    6.64   0
   7 -10   2    1.60   12.94   0
   7 -10   2   13.02   20.52   0
   7 -11  -2    7.24   21.69   0
   7 -11  -2  -11.00   14.46   0
   7  11  -2    6.29    6.76   0
   6 -11  -2   29.01   16.62   0
   6 -11  -2    0.79   11.21   0
   6  11  -2    1.90    5.74   0
   5 -11  -2   -3.56    9.09   0
   5 -11  -2    3.93   11.97   0
   5  11  -2    9.40    5.16   0
   4 -11  -2    4.62    7.69   0
   4 -11  -2   14.26   10.37   0
   4  11  -2    4.73    4.53   0
   3 -11  -2   13.83    7.17   0
   3 -11  -2    4.91    8.83   0
  -3  11   2    8.63    8.62   0
   3  11  -2   17.16    4.78   0
  -2 -11   2   22.53    4.28   0
   2 -11  -2   20.67    8.38   0
  -2 -11   2   19.22    3.85   0
   2 -11  -2   28.29    6.35   0
  -2  11   2   18.99    8.67   0
   2  11  -2   18.39    5.29   0
   1 -11  -2  288.50   20.74   0
  -1 -11   2  312.19   20.01   0
  -1 -11   2  311.82   21.22   0
   1 -11  -2  316.24   22.42   0
   1  11  -2  292.89   20.69   0
  -1  11   2  284.75   22.44   0
   0 -11   2  399.03   27.02   0
   0 -11  -2  359.81   26.48   0
   0 -11   2  394.30   25.45   0
   0 -11  -2  399.77   25.32   0
   0  11   2  398.05   27.36   0
   0  11  -2  395.88   26.24   0
  -1 -11  -2   81.80    7.02   0
   1 -11   2   77.14    8.87   0
   1 -11   2   85.49   11.53   0
  -1 -11  -2   80.45    8.55   0
   1  11   2   76.18   10.83   0
  -1  11  -2   81.04   10.03   0
   2 -11   2   76.42    9.85   0
   2 -11   2   74.54   11.09   0
  -2  11  -2   98.84   10.34   0
   2  11   2   95.36   11.09   0
   3 -11   2   52.05    8.06   0
   3 -11   2   15.16    9.63   0
   3  11   2   48.37    7.87   0
   4 -11   2   84.37   10.24   0
   4 -11   2   45.66   12.46   0
   4  11   2   55.98    8.65   0
   5 -11   2   -7.22   13.60   0
   5 -11   2    2.99    8.92   0
   5  11   2    0.76    7.49   0
   6 -11   2  -18.62   17.81   0
   6 -11   2   -2.06   11.34   0
   6  11   2   -3.61    8.28   0
   6 -12  -2   -6.26   16.82   0
   6 -12  -2   23.89   13.13   0
   6  12  -2   -5.35    7.14   0
   5 -12  -2    3.65    9.69   0
   5 -12  -2   13.84   14.93   0
   5  12  -2    5.62    6.31   0
   4 -12  -2   89.84   15.23   0
   4 -12  -2   58.97   10.37   0
   4  12  -2   68.74    9.78   0
   3 -12  -2  146.76   18.37   0
   3 -12  -2  167.12   15.83   0
   3  12  -2  169.96   13.54   0
  -3  12   2  157.69   18.12   0
  -2 -12   2  268.07   18.85   0
   2 -12  -2  286.01   21.08   0
  -2 -12   2  290.64   18.64   0
   2 -12  -2  272.97   22.83   0
   2  12  -2  303.51   20.15   0
  -2  12   2  271.64   23.02   0
   1 -12  -2   97.08   10.21   0
  -1 -12   2   88.69    8.69   0
   1 -12  -2   80.42   11.61   0
  -1 -12   2   87.78   10.83   0
   1  12  -2   88.31   10.88   0
  -1  12   2   76.75   11.61   0
   0 -12   2  427.17   27.54   0
   0 -12  -2  432.02   27.28   0
   0 -12  -2  415.25   28.79   0
   0 -12   2  427.18   29.42   0
   0  12  -2  428.31   28.66   0
   0  12   2  392.04   29.48   0
  -1 -12  -2    3.27    3.58   0
  -1 -12  -2    1.25    5.30   0
   1 -12   2  -19.21    7.27   0
   1 -12   2    4.25    5.28   0
   1  12   2   -2.55    7.06   0
  -1  12  -2    2.41    6.52   0
   2 -12   2   53.49    8.15   0
   2 -12   2   30.45   10.15   0
   2  12   2   49.47    8.85   0
  -2  12  -2   50.73    9.39   0
   3 -12   2  -14.99    7.18   0
   3 -12   2    2.28   10.30   0
   3  12   2    1.32    7.55   0
   4 -12   2   12.80    8.66   0
   4 -12   2   10.98   12.94   0
   4  12   2   12.78    8.37   0
   5 -12   2  -15.88   15.35   0
   5 -12   2   21.25   10.69   0
   5  12   2    0.99    9.26   0
   6 -12   2  -14.30   19.89   0
   6 -12   2   37.73   13.49   0
   6  12   2   40.95   11.02   0
   6 -13  -2   51.39   20.64   0
   6 -13  -2   12.20   13.20   0
   6  13  -2   24.03    9.23   0
   5 -13  -2  112.34   19.36   0
   5 -13  -2  106.55   15.49   0
   5  13  -2  107.63   13.36   0
   4 -13  -2  178.53   22.49   0
   4 -13  -2  120.98   14.90   0
   4  13  -2  151.20   14.17   0
   3 -13  -2    5.91    8.68   0
   3 -13  -2  -11.96   10.85   0
  -3  13   2    0.55   10.61   0
   3  13  -2   -2.40    6.54   0
  -2 -13   2  436.39   25.45   0
  -2 -13   2  386.58   25.52   0
   2 -13  -2  353.21   29.52   0
   2 -13  -2  400.43   27.68   0
   2  13  -2  387.40   27.27   0
  -2  13   2  385.87   29.93   0
   1 -13  -2   13.91    6.09   0
   1 -13  -2   19.27    8.94   0
  -1 -13   2   15.49    6.98   0
  -1 -13   2   13.03    5.15   0
   1  13  -2    0.66    7.00   0
  -1  13   2   -2.15    9.31   0
   0 -13   2   -5.84    7.91   0
   0 -13   2   -2.64    5.27   0
   0 -13  -2   -4.35    4.71   0
   0 -13  -2    0.69    7.37   0
   0  13  -2    0.70    7.34   0
   0  13   2   -8.71    8.57   0
  -1 -13  -2   56.71    6.98   0
   1 -13   2   59.85   10.59   0
  -1 -13  -2   61.56    8.22   0
   1 -13   2   79.32    9.12   0
  -1  13  -2   56.81    9.68   0
   1  13   2   44.71   10.28   0
   2 -13   2    1.38    6.96   0
   2 -13   2    8.17   10.10   0
   2  13   2    1.08    8.62   0
  -2  13  -2    9.62    9.43   0
   3 -13   2   62.88   10.81   0
   3 -13   2   71.64   14.44   0
   3  13   2   55.53   10.79   0
   4 -13   2   74.72   12.68   0
   4 -13   2   61.55   15.54   0
   4  13   2   94.89   12.19   0
   5 -13   2   18.44   12.11   0
   5 -13   2  -10.72   17.45   0
   5  13   2    3.53   11.29   0
   6 -13   2    4.82   21.87   0
   6  13   2    1.48   12.75   0
   5 -14  -2   20.01   13.40   0
   5 -14  -2   10.92   16.71   0
   5  14  -2   -6.86   10.42   0
   4 -14  -2   22.94   11.53   0
   4 -14  -2   16.52   14.88   0
   4  14  -2    9.90    9.54   0
   3 -14  -2   78.74   12.56   0
   3 -14  -2   66.66   14.65   0
   3  14  -2   86.57   11.18   0
   2 -14  -2    1.81   11.91   0
  -2 -14   2    6.29    4.84   0
  -2 -14   2   15.26    5.27   0
   2 -14  -2    4.78    8.10   0
   2  14  -2   10.96    8.12   0
  -2  14   2    2.81   11.41   0
  -1 -14   2  132.23   13.62   0
   1 -14  -2   89.33   13.44   0
   1 -14  -2   95.32   11.82   0
  -1 -14   2  101.03   10.65   0
  -1  14   2  102.77   15.33   0
   1  14  -2  140.48   14.95   0
   0 -14   2    2.15    6.09   0
   0 -14  -2    4.68    5.40   0
   0 -14   2   -8.49    8.90   0
   0 -14  -2   16.99    8.54   0
   0  14  -2    2.14    8.63   0
   0  14   2    5.06   10.46   0
  -1 -14  -2  156.15   11.45   0
   1 -14   2  150.33   18.41   0
  -1 -14  -2  130.58   13.63   0
   1 -14   2  143.17   13.82   0
   1  14   2  114.02   16.93   0
  -1  14  -2  140.78   16.86   0
   2 -14   2   30.42   11.96   0
   2 -14   2   29.28    8.75   0
   2  14   2   16.64   10.79   0
   3 -14   2   68.47   12.13   0
   3 -14   2   56.18   16.17   0
   3  14   2   74.23   12.76   0
   4 -14   2   -1.19   15.45   0
   4 -14   2  -12.43   11.22   0
   4  14   2   26.79   12.31   0
   5 -14   2  103.26   21.30   0
   5 -14   2   52.94   14.83   0
   5  14   2   88.65   16.20   0
   5 -15  -2   44.70   15.58   0
   5 -15  -2   58.40   20.28   0
   5  15  -2   63.23   14.17   0
   4 -15  -2   86.20   15.27   0
   4 -15  -2   55.60   18.79   0
   4  15  -2   80.77   13.28   0
   3 -15  -2   22.22   11.41   0
   3 -15  -2   55.95   15.62   0
   3  15  -2   11.88   10.58   0
   2 -15  -2   35.06   14.42   0
  -2 -15   2   37.04    6.25   0
  -2 -15   2   40.29    5.96   0
   2 -15  -2   28.40   10.02   0
   2  15  -2   40.21   11.05   0
  -2  15   2   19.97   13.07   0
   1 -15  -2  164.17   19.74   0
  -1 -15   2  177.53   17.37   0
   1 -15  -2  182.86   16.05   0
  -1 -15   2  192.67   14.92   0
  -1  15   2  157.03   19.40   0
   1  15  -2  160.88   19.40   0
   0 -15   2   23.34   10.89   0
   0 -15  -2   30.56    7.00   0
   0 -15  -2   43.79   10.49   0
   0 -15   2   26.09    7.75   0
   0  15   2    6.44   11.74   0
   0  15  -2   23.34   11.19   0
   1 -15   2    8.20   11.79   0
  -1 -15  -2   19.92    5.79   0
   1 -15   2    8.65    8.31   0
  -1 -15  -2   29.30    7.84   0
  -1  15  -2   12.45   10.96   0
   1  15   2    5.05   12.05   0
   2 -15   2   12.31    9.57   0
   2 -15   2  -12.67   13.10   0
   2  15   2    1.00   12.06   0
   3 -15   2   22.99   12.26   0
   3 -15   2   37.21   15.76   0
   3  15   2   26.03   13.42   0
   4 -15   2   19.50   14.30   0
   4 -15   2   54.75   19.38   0
   4  15   2   13.63   15.59   0
   4 -16  -2   47.06   15.99   0
   4 -16  -2   72.92   21.26   0
   4  16  -2   41.57   15.41   0
   3 -16  -2  -10.75   16.47   0
   3 -16  -2   31.71   12.88   0
   3  16  -2   35.13   13.47   0
   2 -16  -2   47.94   11.73   0
  -2 -16   2   40.10    6.20   0
  -2 -16   2   48.62    6.21   0
   2 -16  -2   53.75   16.17   0
   2  16  -2   51.75   13.72   0
  -1 -16   2    8.69   10.32   0
  -1 -16   2   18.07    7.84   0
   1 -16  -2   18.39    8.95   0
   1 -16  -2   -5.91   12.61   0
   1  16  -2    4.37   12.72   0
  -1  16   2   14.18   14.38   0
   0 -16  -2   17.36    7.32   0
   0 -16  -2   31.68   11.38   0
   0 -16   2   38.95   12.15   0
   0 -16   2   13.37    8.40   0
   0  16  -2    5.26   12.99   0
   0  16   2   -6.60   13.77   0
   1 -16   2  111.61   17.60   0
  -1 -16  -2  104.49   11.51   0
  -1 -16  -2  132.75   14.23   0
   1 -16   2  138.39   15.69   0
   1  16   2  110.80   17.21   0
   2 -16   2   32.26   15.38   0
   2 -16   2   41.10   11.61   0
   2  16   2   45.66   15.18   0
   3 -16   2  -11.46   13.21   0
   3 -16   2  -18.04   17.58   0
   3  16   2  -15.12   15.03   0
   4 -16   2   -0.34   19.99   0
   4  16   2   25.95   17.73   0
   3 -17  -2   59.54   20.67   0
   3 -17  -2   55.05   15.79   0
   3  17  -2   81.60   17.69   0
   2 -17  -2    3.29   11.85   0
   2 -17  -2   51.35   18.33   0
   2  17  -2    7.34   15.38   0
   1 -17  -2   93.75   12.79   0
   1 -17  -2   43.03   16.58   0
  -1 -17   2  108.66   14.06   0
   1  17  -2   67.72   16.81   0
  -1  17   2   80.05   18.91   0
   0 -17   2   19.40   13.90   0
   0 -17  -2   13.56   12.41   0
   0 -17  -2    3.97    8.61   0
   0 -17   2   38.76   10.24   0
   0  17   2   13.77   16.19   0
   0  17  -2   29.34   14.95   0
  -1 -17  -2    5.97    6.87   0
   1 -17   2  -17.02   16.05   0
   1 -17   2    4.60   11.25   0
  -1 -17  -2   -1.02    9.22   0
   1  17   2   -6.32   16.37   0
   2 -17   2   -4.60   17.50   0
   2 -17   2    8.86   13.00   0
   2  17   2    2.09   17.11   0
  -1 -18   2   32.75   11.02   0
  -1 -18   2   39.52   13.47   0
   1 -18  -2   27.54   12.07   0
   1 -18  -2   11.70   17.89   0
   1  18  -2   44.71   19.04   0
   0 -18   2   13.90   11.63   0
   0 -18  -2   -0.09    9.72   0
   0 -18  -2   21.10   14.63   0
   0 -18   2   28.70   16.67   0
   1 -18   2   48.09   19.28   0
  -1 -18  -2   25.05   10.93   0
   1  18   2   65.90   20.36   0
   9   0  -3   20.99   19.93   0
   8   0  -3    4.98   13.07   0
   7   0  -3    6.26    9.41   0
   6   0  -3    2.53    6.67   0
   5   0  -3   10.39    4.92   0
   4   0  -3    5.60    3.69   0
   3   0  -3    0.84    3.02   0
  -3   0   3   -0.18    2.41   0
   2   0  -3   -0.15    2.46   0
  -2   0   3    2.46    2.47   0
  -1   0   3   -1.87    2.37   0
   1   0  -3   -3.17    2.30   0
   0   0  -3    2.29    2.23   0
   0   0   3   -0.95    2.38   0
   1   0   3    1.27    1.74   0
  -1   0  -3   -1.40    1.37   0
  -2   0  -3    1.59    1.36   0
   2   0   3    0.41    1.67   0
   3   0   3   -1.38    1.87   0
   4   0   3    0.62    2.40   0
   5   0   3   -1.61    3.29   0
   6   0   3   -1.46    4.47   0
   7   0   3    7.93    6.45   0
   8   0   3   18.65    9.33   0
   8   0   3   12.88   13.45   0
   9  -1  -3   12.28   20.43   0
   8  -1  -3   14.67   13.99   0
   8   1  -3    0.41   12.66   0
   7  -1  -3   63.36   11.47   0
   7   1  -3   51.82   10.30   0
   6  -1  -3  157.71   15.17   0
   6   1  -3  180.63   14.53   0
   5  -1  -3   54.36    7.67   0
   5   1  -3   62.94    7.80   0
   4  -1  -3  202.60   14.85   0
   4   1  -3  207.71   14.40   0
  -4   1   3  211.57   13.96   0
   3  -1  -3   99.53    8.32   0
  -3  -1   3   97.08    6.91   0
  -3   1   3   88.72    7.66   0
   3   1  -3  102.55    7.75   0
  -2  -1   3  110.87    8.27   0
   2  -1  -3  116.11    8.94   0
  -2   1   3  119.33    8.70   0
   2   1  -3  122.37    8.43   0
  -1  -1   3  712.67   44.13   0
   1  -1  -3  741.46   44.35   0
  -1   1   3  735.04   44.40   0
   1   1  -3  693.38   44.06   0
   0  -1  -3  144.56    9.95   0
   0  -1   3  139.02   10.00   0
   0   1  -3  150.74    9.91   0
   0   1   3  155.01   10.03   0
   1  -1   3   35.93    3.62   0
  -1  -1  -3   31.30    3.11   0
  -1   1  -3   43.41    3.48   0
   2  -1   3   -1.22    1.73   0
  -2  -1  -3    0.62    1.06   0
   2   1   3   -1.29    1.47   0
  -2   1  -3   -1.07    1.61   0
   3  -1   3   70.15    5.56   0
   3   1   3   62.89    5.03   0
   4  -1   3   34.35    4.61   0
   4   1   3   26.50    3.77   0
   5  -1   3   18.43    4.20   0
   5   1   3   17.39    3.60   0
   6  -1   3   22.18    5.63   0
   6   1   3   24.76    4.99   0
   7  -1   3   20.67    6.89   0
   7  -1   3    8.58   10.02   0
   7   1   3    2.92    5.92   0
   8  -1   3   25.23   14.53   0
   8  -1   3   13.09    9.78   0
   8   1   3   -1.94    8.46   0
   8   1   3   23.38   12.79   0
   9   2  -3   -3.84   18.96   0
   8  -2  -3   37.35   15.36   0
   8   2  -3   20.76   13.16   0
   7  -2  -3    4.88   10.14   0
   7   2  -3    2.71    8.61   0
   6  -2  -3  581.20   39.77   0
   6   2  -3  628.28   38.90   0
   5  -2  -3   93.26   10.49   0
   5   2  -3   89.03    8.67   0
   4  -2  -3  684.33   43.61   0
  -4   2   3  693.30   43.08   0
   4   2  -3  698.02   42.84   0
  -3  -2   3  138.03    9.74   0
   3  -2  -3  164.64   11.83   0
  -3   2   3  164.14   11.33   0
   3   2  -3  165.90   10.82   0
  -2  -2   3   10.32    2.32   0
   2  -2  -3    6.42    3.35   0
   2   2  -3   10.82    2.52   0
  -2   2   3   13.44    3.47   0
   1  -2  -3  509.67   31.52   0
  -1  -2   3  479.94   31.12   0
   1   2  -3  509.84   31.13   0
  -1   2   3  519.83   31.61   0
   0  -2   3   32.70    4.20   0
   0  -2  -3   31.47    4.26   0
   0   2   3   33.49    4.29   0
   0   2  -3   36.19    3.93   0
   1  -2   3  256.52   15.24   0
  -1   2  -3  259.01   15.15   0
   1   2   3  201.94   15.03   0
   2  -2   3   84.34    6.41   0
   2   2   3   84.85    6.02   0
  -2   2  -3   87.47    6.40   0
   3  -2   3   40.10    4.57   0
   3   2   3   43.90    3.73   0
  -3   2  -3   31.62    4.70   0
   4  -2   3   22.12    3.74   0
   4   2   3   18.35    2.76   0
   5  -2   3    2.49    4.11   0
   5   2   3    3.20    2.84   0
   6  -2   3   23.69    6.10   0
   6   2   3   34.53    4.90   0
   7  -2   3   14.13    7.25   0
   7  -2   3  -11.25   10.59   0
   7   2   3    2.44    5.55   0
   8  -2   3   14.10   10.32   0
   8  -2   3   -1.53   15.22   0
   8   2   3    5.66   12.00   0
   8   2   3   11.97    8.26   0
   8  -3  -3  111.10   19.01   0
   8   3  -3  115.73   15.58   0
   7  -3  -3   38.02   11.47   0
   7   3  -3   32.04    9.44   0
   6  -3  -3  595.44   40.27   0
   6   3  -3  613.96   38.60   0
   5  -3  -3    9.59    6.03   0
   5   3  -3    7.30    4.28   0
   4  -3  -3   36.86    6.08   0
  -4   3   3   19.17    5.00   0
   4   3  -3   28.47    4.02   0
   3  -3  -3  249.76   16.85   0
   3   3  -3  243.82   15.61   0
  -3   3   3  228.91   16.38   0
  -2  -3   3   44.42    4.25   0
   2  -3  -3   46.99    6.10   0
   2   3  -3   53.09    4.45   0
  -2   3   3   44.92    5.92   0
   1  -3  -3  105.16    8.46   0
  -1  -3   3  104.70    7.64   0
  -1   3   3  112.42    8.67   0
   1   3  -3  105.97    7.53   0
   0  -3  -3  346.89   21.41   0
   0  -3   3  329.42   21.23   0
   0   3  -3  340.73   21.18   0
   0   3   3  336.76   21.52   0
   1  -3   3  377.52   24.76   0
   1   3   3  416.68   24.77   0
  -1   3  -3  400.35   24.77   0
   2  -3   3    2.43    2.22   0
  -2   3  -3    3.39    2.25   0
   2   3   3    1.90    1.86   0
   3  -3   3  231.23   14.40   0
  -3   3  -3  234.42   14.50   0
   3   3   3  188.63   13.53   0
   4  -3   3  102.88    8.39   0
   4   3   3   97.24    6.91   0
   5  -3   3  222.60   15.21   0
   5   3   3  202.99   13.71   0
   6  -3   3   -8.74    5.61   0
   6  -3   3  -12.90    8.03   0
   6   3   3   -0.38    3.52   0
   7  -3   3    0.44   11.06   0
   7  -3   3   -3.58    7.19   0
   7   3   3    9.62    5.16   0
   8  -3   3   10.34   10.80   0
   8  -3   3   18.57   17.18   0
   8   3   3   -0.23   11.40   0
   8   3   3   -7.90    7.65   0
   8  -4  -3   45.60   18.11   0
   8  -4  -3  104.65   15.73   0
   8   4  -3   95.22   14.01   0
   7  -4  -3   16.66   12.08   0
   7   4  -3   22.65    8.35   0
   6  -4  -3   67.39   10.85   0
   6   4  -3   58.75    7.76   0
   5  -4  -3   20.66    7.13   0
   5   4  -3    8.18    4.12   0
   4  -4  -3   46.10    7.19   0
  -4   4   3   55.79    6.95   0
   4   4  -3   48.35    5.45   0
   3  -4  -3  165.69   12.86   0
   3   4  -3  159.82   11.01   0
  -3   4   3  166.83   12.48   0
  -2  -4   3   39.05    3.98   0
   2  -4  -3   43.25    5.80   0
   2   4  -3   45.74    4.37   0
  -2   4   3   39.96    5.70   0
   1  -4  -3  394.41   27.23   0
  -1  -4   3  451.34   26.62   0
  -1   4   3  419.48   27.31   0
   1   4  -3  439.35   26.55   0
   0  -4  -3   95.25    7.68   0
   0  -4   3  105.68    7.42   0
   0   4   3   96.46    8.32   0
   0   4  -3  108.94    7.37   0
   1  -4   3   32.53    3.87   0
  -1  -4  -3   23.71    3.36   0
  -1  -4  -3   23.28    3.15   0
  -1   4  -3   35.38    3.80   0
   1   4   3   30.60    3.69   0
   2  -4   3  647.75   40.40   0
  -2   4  -3  653.54   40.42   0
   2   4   3  661.81   40.05   0
   3  -4   3   52.29    5.65   0
  -3   4  -3   50.90    5.75   0
   3   4   3   42.42    4.12   0
   4  -4   3  110.09    8.75   0
   4   4   3   90.23    6.76   0
   5  -4   3  294.05   19.85   0
   5   4   3  283.95   18.16   0
   6  -4   3    0.91    8.88   0
   6  -4   3    5.97    6.32   0
   6   4   3   14.89    3.72   0
   7  -4   3  125.07   16.70   0
   7  -4   3  109.95   14.14   0
   7   4   3  107.46    9.98   0
   8  -4   3    5.27   17.96   0
   8  -4   3    5.92   11.59   0
   8   4   3  -17.22   10.65   0
   8   4   3   10.43    7.70   0
   8  -5  -3  -10.68   17.25   0
   8  -5  -3    8.09   14.00   0
   8   5  -3   -0.24   10.60   0
   7  -5  -3   31.61   11.83   0
   7  -5  -3   20.40   13.25   0
   7   5  -3   25.59    7.81   0
   6  -5  -3   26.95    9.72   0
   5  -5  -3   -1.88    7.07   0
   5   5  -3    3.25    3.77   0
   4  -5  -3   -0.17    5.80   0
   4   5  -3    1.42    2.85   0
  -4   5   3    3.22    5.01   0
   3  -5  -3   32.16    6.19   0
  -3   5   3   18.99    5.28   0
   3   5  -3   29.29    3.55   0
  -2  -5   3  234.93   14.77   0
  -2  -5   3  236.96   14.73   0
   2  -5  -3  219.92   16.43   0
  -2   5   3  218.84   16.29   0
   2   5  -3  235.23   14.93   0
   1  -5  -3  233.10   16.58   0
  -1  -5   3  247.91   15.59   0
   1   5  -3  244.95   15.52   0
  -1   5   3  231.88   16.61   0
   0  -5  -3  126.20    9.15   0
   0  -5   3  117.16    8.49   0
   0   5   3  117.71    9.61   0
   0   5  -3  116.39    8.46   0
  -1  -5  -3   33.67    3.79   0
  -1  -5  -3   35.30    3.68   0
   1  -5   3   35.77    4.39   0
  -1   5  -3   38.77    4.43   0
   1   5   3   39.77    4.61   0
   2  -5   3  942.64   57.42   0
   2   5   3  935.75   57.08   0
  -2   5  -3  928.33   57.45   0
   3  -5   3  221.84   15.20   0
  -3   5  -3  224.00   15.46   0
   4  -5   3   -0.20    4.03   0
   4   5   3    4.07    2.27   0
   5  -5   3   64.59    8.02   0
   5  -5   3   60.74    9.80   0
   5   5   3   35.94    4.64   0
   6  -5   3  102.59   11.44   0
   6  -5   3   91.91   13.01   0
   6   5   3   74.05    7.05   0
   7  -5   3   83.45   11.12   0
   7  -5   3   78.72   15.73   0
   7   5   3   60.28    7.02   0
   8  -5   3  -31.98   19.12   0
   8  -5   3  -18.01   12.16   0
   8   5   3  -10.59    7.36   0
   8  -6  -3    8.63   18.63   0
   8  -6  -3    0.99   15.29   0
   8   6  -3   24.65    9.77   0
   7  -6  -3   14.95   11.46   0
   7  -6  -3   -3.34   13.75   0
   7   6  -3    8.53    6.78   0
   6  -6  -3    2.24   10.35   0
   6  -6  -3    3.05    9.01   0
   6   6  -3   11.28    4.94   0
   5  -6  -3   40.19    9.18   0
   5   6  -3   42.51    5.05   0
   4  -6  -3   42.02    7.71   0
   4   6  -3   37.94    5.08   0
  -4   6   3   32.28    6.97   0
   3  -6  -3    1.93    5.19   0
  -3   6   3   14.29    5.44   0
   3   6  -3    9.83    2.74   0
  -2  -6   3  221.69   14.23   0
  -2  -6   3  230.47   14.39   0
   2  -6  -3  219.30   16.27   0
  -2   6   3  211.75   16.05   0
   2   6  -3  220.01   14.43   0
   1  -6  -3   63.50    7.40   0
  -1  -6   3   70.02    5.80   0
  -1  -6   3   59.53    6.35   0
   1   6  -3   67.81    5.74   0
  -1   6   3   63.21    7.62   0
   0  -6  -3 1002.98   59.27   0
   0  -6   3  950.70   59.59   0
   0  -6   3  954.71   59.20   0
   0  -6  -3  974.72   59.55   0
   0   6   3  950.42   59.78   0
   0   6  -3  970.01   59.22   0
   1  -6   3  630.12   39.30   0
  -1  -6  -3  635.69   38.77   0
  -1  -6  -3  624.78   38.96   0
  -1   6  -3  637.71   39.40   0
   1   6   3  643.52   39.62   0
   2  -6   3   24.30    3.91   0
   2   6   3   20.05    3.80   0
  -2   6  -3   25.96    4.22   0
   3  -6   3  169.77   12.96   0
   3  -6   3  153.75   11.33   0
  -3   6  -3  149.69   11.64   0
   3   6   3  130.54   10.14   0
   4  -6   3  101.67    9.10   0
   4   6   3   78.14    6.70   0
   5  -6   3  159.67   14.78   0
   5   6   3  107.33    8.64   0
   6  -6   3    8.41    7.22   0
   6  -6   3    8.80   11.10   0
   6   6   3    7.27    3.80   0
   7  -6   3   31.13   10.29   0
   7  -6   3   35.66   15.63   0
   7   6   3   23.13    5.62   0
   8  -6   3   25.41   21.80   0
   8  -6   3   48.21   14.42   0
   8   6   3   31.96    8.91   0
   8  -7  -3   55.10   16.73   0
   8  -7  -3   15.49   20.52   0
   8   7  -3   28.69    9.30   0
   7  -7  -3   35.70   12.42   0
   7  -7  -3   43.44   15.60   0
   7   7  -3   34.40    7.17   0
   6  -7  -3   56.22   12.49   0
   6  -7  -3   52.57   11.14   0
   6   7  -3   57.21    8.00   0
   5  -7  -3   55.46   10.23   0
   5  -7  -3   38.96    9.23   0
   5   7  -3   32.30    4.98   0
   4  -7  -3   15.59    7.29   0
   4  -7  -3   -9.08    6.46   0
  -4   7   3    5.89    6.36   0
   4   7  -3    1.88    3.16   0
   3  -7  -3  245.48   19.48   0
   3  -7  -3  265.76   18.99   0
   3   7  -3  268.00   17.08   0
  -3   7   3  271.15   19.39   0
   2  -7  -3   47.64    7.34   0
  -2  -7   3   48.65    4.95   0
   2  -7  -3   66.51    7.32   0
  -2  -7   3   53.26    5.33   0
  -2   7   3   49.81    7.39   0
   2   7  -3   48.20    5.15   0
   1  -7  -3   31.28    5.60   0
  -1  -7   3   31.38    4.48   0
   1  -7  -3   31.32    5.15   0
  -1  -7   3   37.30    4.88   0
   1   7  -3   33.61    4.10   0
  -1   7   3   27.44    5.72   0
   0  -7  -3   71.51    6.61   0
   0  -7   3   84.87    7.81   0
   0  -7   3   76.71    6.54   0
   0  -7  -3   58.94    7.20   0
   0   7   3   66.60    8.01   0
   0   7  -3   73.33    6.41   0
  -1  -7  -3   52.27    5.30   0
   1  -7   3   62.95    7.75   0
   1  -7   3   57.96    5.87   0
  -1  -7  -3   56.92    4.88   0
  -1   7  -3   57.68    6.14   0
   1   7   3   50.35    6.86   0
   2  -7   3   28.37    4.76   0
   2  -7   3   32.53    6.28   0
  -2   7  -3   25.76    4.76   0
   2   7   3   35.53    4.91   0
   3  -7   3  411.87   28.17   0
   3  -7   3  418.94   26.93   0
   3   7   3  425.29   26.20   0
  -3   7  -3  398.16   27.07   0
   4  -7   3   39.04    8.80   0
   4  -7   3   52.30    6.92   0
   4   7   3   43.40    5.66   0
   5  -7   3   73.32   11.92   0
   5  -7   3   73.16    9.08   0
   6  -7   3   75.33   13.85   0
   6  -7   3   48.29    9.13   0
   6   7   3   39.28    5.49   0
   7  -7   3  120.70   19.99   0
   7  -7   3  151.28   17.49   0
   7   7   3   87.36   10.31   0
   8  -8  -3  183.53   27.41   0
   8  -8  -3  164.56   22.66   0
   7  -8  -3   62.47   17.59   0
   7  -8  -3   55.24   13.14   0
   7   8  -3   37.79    7.95   0
   6  -8  -3    3.00   12.23   0
   6  -8  -3  -17.50   10.05   0
   6   8  -3   -7.57    5.08   0
   5  -8  -3  161.19   18.03   0
   5  -8  -3  168.22   16.46   0
   5   8  -3  158.36   12.07   0
   4  -8  -3   99.89   13.84   0
   4  -8  -3  100.13   12.71   0
   4   8  -3  114.63    8.90   0
  -4   8   3  118.59   12.93   0
   3  -8  -3  156.65   13.68   0
   3  -8  -3  153.15   14.43   0
   3   8  -3  156.36   11.05   0
  -3   8   3  146.83   14.28   0
   2  -8  -3   20.14    5.36   0
   2  -8  -3   28.86    6.88   0
  -2  -8   3   23.96    3.76   0
  -2  -8   3   23.65    3.61   0
   2   8  -3   23.35    3.84   0
  -2   8   3    5.78    5.53   0
  -1  -8   3  137.44    9.89   0
   1  -8  -3  129.50   11.98   0
   1  -8  -3  136.69   10.77   0
  -1  -8   3  142.52   10.68   0
  -1   8   3  124.74   12.03   0
   1   8  -3  130.95    9.83   0
   0  -8   3  177.19   12.48   0
   0  -8  -3  191.54   12.75   0
   0  -8   3  175.08   13.79   0
   0  -8  -3  173.66   13.28   0
   0   8  -3  172.52   12.68   0
   0   8   3  192.65   14.18   0
  -1  -8  -3  497.71   29.17   0
   1  -8   3  462.91   29.42   0
   1  -8   3  453.34   30.38   0
  -1  -8  -3  454.76   28.68   0
  -1   8  -3  454.00   29.61   0
   1   8   3  457.76   30.01   0
   2  -8   3   19.85    4.86   0
   2  -8   3   20.89    6.59   0
  -2   8  -3   33.10    5.38   0
   2   8   3   29.45    5.23   0
   3  -8   3   69.22    9.30   0
   3  -8   3   59.75    7.29   0
   3   8   3   48.92    6.21   0
  -3   8  -3   56.58    7.38   0
   4  -8   3  143.42   13.20   0
   4  -8   3  147.22   15.57   0
   4   8   3  156.51   11.47   0
   5  -8   3  150.59   14.05   0
   5  -8   3  152.77   17.94   0
   5   8   3  132.09   10.90   0
   6  -8   3   11.60   13.81   0
   6  -8   3   -3.96    8.22   0
   6   8   3   -2.11    4.77   0
   7  -8   3   17.84   11.91   0
   7  -8   3   29.13   19.47   0
   7   8   3   18.63    6.05   0
   7  -9  -3  -14.36   14.18   0
   7  -9  -3   17.11   18.27   0
   7   9  -3    2.83    6.89   0
   6  -9  -3  151.64   16.94   0
   6  -9  -3  150.46   19.34   0
   6   9  -3  137.82   12.12   0
   5  -9  -3  153.30   18.25   0
   5  -9  -3  119.26   15.88   0
   5   9  -3  127.58   10.53   0
   4  -9  -3    6.68    7.43   0
   4  -9  -3    5.97    8.77   0
  -4   9   3   10.91    8.02   0
   4   9  -3    8.54    3.94   0
   3  -9  -3   73.96   10.38   0
   3  -9  -3   79.53    9.45   0
   3   9  -3   79.84    7.39   0
  -3   9   3   71.26   10.47   0
   2  -9  -3  234.64   19.52   0
  -2  -9   3  257.15   17.01   0
   2  -9  -3  262.12   18.51   0
  -2  -9   3  273.82   16.81   0
  -2   9   3  236.67   19.18   0
   2   9  -3  250.70   16.97   0
  -1  -9   3  410.49   27.28   0
   1  -9  -3  426.87   27.18   0
  -1  -9   3  428.05   26.57   0
   1  -9  -3  424.22   28.25   0
  -1   9   3  406.19   28.27   0
   1   9  -3  403.48   26.60   0
   0  -9  -3    8.78    4.87   0
   0  -9  -3    4.88    3.42   0
   0  -9   3    2.65    4.83   0
   0  -9   3    2.37    3.42   0
   0   9   3   -0.94    5.45   0
   0   9  -3   -2.69    3.69   0
   1  -9   3   -0.99    3.49   0
  -1  -9  -3   -0.50    2.40   0
  -1  -9  -3   -1.46    3.43   0
   1  -9   3    2.79    5.55   0
   1   9   3   -0.99    4.90   0
  -1   9  -3    2.02    4.09   0
   2  -9   3  146.44   13.96   0
   2  -9   3  150.18   11.92   0
   2   9   3  143.91   12.36   0
  -2   9  -3  152.15   12.38   0
   3  -9   3  367.39   26.86   0
   3  -9   3  388.02   25.12   0
   3   9   3  366.92   24.58   0
  -3   9  -3  366.28   25.51   0
   4  -9   3   30.42    7.34   0
   4  -9   3   34.98   10.08   0
   4   9   3   35.34    6.12   0
   5  -9   3   16.07   11.97   0
   5  -9   3   17.95    8.08   0
   5   9   3   17.27    5.70   0
   6  -9   3   36.47   16.59   0
   6  -9   3   53.57   11.09   0
   6   9   3   59.97    7.35   0
   7  -9   3   84.03   21.21   0
   7  -9   3   22.10   13.18   0
   7   9   3   31.23    7.45   0
   7 -10  -3   40.07   20.91   0
   7 -10  -3   -2.91   15.07   0
   7  10  -3   10.63    7.24   0
   6 -10  -3   -2.53   15.11   0
   6 -10  -3    8.60   12.13   0
   6  10  -3   -3.27    5.75   0
   5 -10  -3   13.65    9.19   0
   5 -10  -3   44.18   12.75   0
   5  10  -3    8.89    5.16   0
   4 -10  -3  119.60   15.52   0
   4 -10  -3  121.43   14.53   0
  -4  10   3  132.68   15.87   0
   4  10  -3  144.18   10.92   0
   3 -10  -3  109.64   12.87   0
   3 -10  -3   92.34   12.44   0
   3  10  -3  111.17    9.24   0
  -3  10   3  123.57   14.47   0
   2 -10  -3   -6.35    6.82   0
  -2 -10   3    4.19    4.00   0
   2 -10  -3   11.10    6.06   0
  -2 -10   3    6.39    3.66   0
   2  10  -3    0.33    3.87   0
  -2  10   3   -1.04    6.50   0
  -1 -10   3   20.07    5.58   0
   1 -10  -3   23.39    6.66   0
   1 -10  -3   17.30    5.30   0
  -1 -10   3   17.11    4.18   0
   1  10  -3   14.54    4.54   0
  -1  10   3   12.46    6.90   0
   0 -10   3   82.34    9.95   0
   0 -10  -3   67.49    7.39   0
   0 -10   3   64.99    7.47   0
   0 -10  -3   70.69    8.94   0
   0  10  -3   63.61    8.06   0
   0  10   3   77.23    9.61   0
  -1 -10  -3  210.01   13.23   0
   1 -10   3  186.61   14.47   0
  -1 -10  -3  190.76   13.89   0
   1 -10   3  190.69   16.60   0
   1  10   3  202.58   15.78   0
  -1  10  -3  200.77   15.25   0
   2 -10   3   96.14   13.05   0
   2 -10   3  106.98   10.69   0
  -2  10  -3  105.24   11.27   0
   2  10   3  131.41   11.62   0
   3 -10   3   -2.46    5.73   0
   3 -10   3   -2.68    8.10   0
   3  10   3    3.77    5.82   0
  -3  10  -3   16.45    6.76   0
   4 -10   3   93.48   12.02   0
   4 -10   3   82.31   13.18   0
   4  10   3   98.96   11.09   0
   5 -10   3  158.29   21.68   0
   5 -10   3  169.14   17.07   0
   5  10   3  187.96   15.00   0
   6 -10   3   16.99   16.90   0
   6 -10   3   -0.96   10.89   0
   6  10   3   16.20    7.67   0
   7 -10   3   -4.26   22.71   0
   7 -10   3   29.74   14.86   0
   7  10   3   20.19   11.92   0
   7 -11  -3  -18.48   14.96   0
   7 -11  -3   -2.01   21.55   0
   7  11  -3    6.12    7.60   0
   6 -11  -3  138.82   20.89   0
   6 -11  -3  116.99   17.42   0
   6  11  -3  171.56   13.54   0
   5 -11  -3   21.10   12.97   0
   5 -11  -3   25.16   10.86   0
   5  11  -3   19.50    5.84   0
   4 -11  -3    8.62    8.56   0
   4 -11  -3    5.57   10.18   0
   4  11  -3    0.20    4.91   0
  -4  11   3    1.80    9.77   0
   3 -11  -3   16.45    9.52   0
   3 -11  -3   10.85    7.52   0
  -3  11   3   19.42    9.52   0
   3  11  -3   21.52    5.29   0
   2 -11  -3  305.52   23.53   0
  -2 -11   3  303.48   19.57   0
   2 -11  -3  288.15   21.41   0
  -2 -11   3  291.88   19.85   0
   2  11  -3  288.88   20.18   0
  -2  11   3  296.13   23.11   0
  -1 -11   3   -4.60    5.43   0
  -1 -11   3    1.55    4.04   0
   1 -11  -3    1.17    6.98   0
   1 -11  -3   11.33    5.36   0
  -1  11   3    8.47    6.65   0
   1  11  -3   -0.10    4.73   0
   0 -11   3   -5.49    4.19   0
   0 -11  -3    4.01    6.01   0
   0 -11  -3    8.61    4.18   0
   0 -11   3    8.81    6.71   0
   0  11   3    5.30    6.67   0
   0  11  -3   -0.63    5.00   0
   1 -11   3    8.39    4.90   0
  -1 -11  -3   -3.08    3.09   0
  -1 -11  -3    5.14    4.53   0
   1 -11   3   10.72    7.03   0
   1  11   3   -0.71    6.73   0
  -1  11  -3   -3.94    5.31   0
   2 -11   3  117.17   11.79   0
   2 -11   3  135.64   14.68   0
   2  11   3  123.83   12.52   0
  -2  11  -3  101.01   12.44   0
   3 -11   3   84.63   11.53   0
   3  11   3   93.02   11.77   0
  -3  11  -3   93.53   10.95   0
   4 -11   3    6.37    7.71   0
   4 -11   3    1.45   11.15   0
   4  11   3   -0.65    7.39   0
   5 -11   3   31.94    9.92   0
   5 -11   3   61.87   14.91   0
   5  11   3   48.91    9.36   0
   6 -11   3    8.79   11.58   0
   6 -11   3   53.72   18.99   0
   6  11   3   23.46    9.86   0
   6 -12  -3   -5.10   16.57   0
   6 -12  -3   -7.87   12.72   0
   6  12  -3   -3.48    7.32   0
   5 -12  -3   15.62   10.88   0
   5 -12  -3   -4.44   13.55   0
   5  12  -3   -0.17    6.21   0
   4 -12  -3  269.74   28.89   0
   4 -12  -3  341.75   26.37   0
   4  12  -3  358.89   23.19   0
  -4  12   3  364.23   28.49   0
   3 -12  -3   11.45    8.45   0
   3 -12  -3   14.62   10.99   0
  -3  12   3   18.40   10.94   0
   3  12  -3   11.60    5.68   0
  -2 -12   3  287.56   18.45   0
   2 -12  -3  273.82   22.35   0
   2 -12  -3  260.26   20.72   0
  -2 -12   3  276.58   18.82   0
  -2  12   3  247.67   22.57   0
   2  12  -3  270.50   19.56   0
  -1 -12   3  102.38   10.05   0
  -1 -12   3  104.82   11.86   0
   1 -12  -3  113.33   11.31   0
   1 -12  -3   91.76   12.97   0
  -1  12   3  106.80   13.56   0
   1  12  -3  119.13   11.29   0
   0 -12   3   17.38    5.49   0
   0 -12  -3   17.25    4.92   0
   0 -12   3   12.53    7.92   0
   0 -12  -3   19.07    6.98   0
   0  12   3   16.19    8.10   0
   0  12  -3    4.54    6.45   0
   1 -12   3  112.30   10.84   0
   1 -12   3  114.21   13.65   0
  -1 -12  -3  116.18   10.28   0
  -1 -12  -3   98.05    8.56   0
  -1  12  -3   99.52   12.16   0
   1  12   3   92.02   13.36   0
   2 -12   3  -10.73    6.20   0
   2 -12   3  -14.02    8.81   0
  -2  12  -3   -5.59    7.10   0
   2  12   3    4.13    7.55   0
   3 -12   3    7.75    7.53   0
   3 -12   3   30.78   11.26   0
   3  12   3   15.02    8.17   0
   4 -12   3  110.86   16.03   0
   4 -12   3   78.03   11.96   0
   4  12   3   82.21   11.30   0
   5 -12   3   28.82   16.32   0
   5 -12   3   24.97   11.51   0
   5  12   3   34.95   10.17   0
   6 -12   3   -3.15   13.44   0
   6 -12   3    0.04   20.85   0
   6  12   3   15.74   11.88   0
   6 -13  -3   43.28   20.57   0
   6 -13  -3   32.17   14.33   0
   6  13  -3   13.91    9.33   0
   5 -13  -3    5.06   11.63   0
   5 -13  -3   18.47   16.95   0
   5  13  -3   -0.03    7.87   0
   4 -13  -3  223.02   25.54   0
   4 -13  -3  257.41   22.15   0
  -4  13   3  249.46   24.81   0
   4  13  -3  225.98   18.89   0
   3 -13  -3  132.38   17.00   0
   3 -13  -3  125.54   16.23   0
   3  13  -3  160.37   14.09   0
  -3  13   3  143.71   19.12   0
  -2 -13   3   69.59    8.70   0
   2 -13  -3   86.52   13.14   0
   2 -13  -3   84.38   10.82   0
  -2 -13   3   76.11    9.41   0
  -2  13   3   86.00   13.86   0
   2  13  -3   85.43   11.24   0
   1 -13  -3  123.73   12.43   0
  -1 -13   3  117.86   13.23   0
  -1 -13   3  123.20   11.32   0
   1 -13  -3  118.67   15.45   0
  -1  13   3  119.14   16.05   0
   1  13  -3  126.55   13.50   0
   0 -13  -3    7.41    7.44   0
   0 -13   3   17.26    8.40   0
   0 -13   3   12.02    6.43   0
   0 -13  -3   23.71    5.68   0
   0  13  -3   27.83    8.34   0
   0  13   3   33.56   10.27   0
   1 -13   3   62.76    8.36   0
  -1 -13  -3   47.17    6.51   0
   1 -13   3   33.84   10.33   0
  -1 -13  -3   44.02    7.32   0
  -1  13  -3   56.66   10.04   0
   1  13   3   44.04   10.59   0
   2 -13   3   17.29    7.92   0
   2 -13   3   31.25   11.16   0
   2  13   3   20.53    9.16   0
  -2  13  -3   19.20    9.72   0
   3 -13   3  178.98   18.18   0
   3 -13   3  181.96   21.95   0
   3  13   3  208.26   18.48   0
   4 -13   3  -16.34   14.60   0
   4 -13   3   -5.45   10.36   0
   4  13   3    6.42   10.29   0
   5 -13   3   16.54   19.01   0
   5 -13   3   25.18   12.84   0
   5  13   3   29.21   12.49   0
   5 -14  -3   -8.22   17.21   0
   5 -14  -3   35.73   13.54   0
   5  14  -3   19.95    9.85   0
   4 -14  -3   15.66   11.82   0
   4 -14  -3   25.96   15.73   0
   4  14  -3    8.30    8.73   0
   3 -14  -3   53.62   14.39   0
   3 -14  -3   43.30   10.78   0
  -3  14   3   26.57   13.33   0
   3  14  -3   46.68    9.46   0
  -2 -14   3   -9.94    5.81   0
   2 -14  -3    1.32    8.02   0
   2 -14  -3   -4.59   11.39   0
  -2 -14   3    4.20    5.34   0
   2  14  -3    3.99    8.03   0
  -2  14   3   17.27   12.00   0
  -1 -14   3    2.85    6.26   0
   1 -14  -3   -0.42    6.63   0
   1 -14  -3   -7.55    9.96   0
  -1 -14   3  -11.17    8.27   0
  -1  14   3  -16.32   10.20   0
   1  14  -3   -7.87    8.16   0
   0 -14  -3   22.32    6.03   0
   0 -14  -3   41.07    9.14   0
   0 -14   3    4.12    6.86   0
   0 -14   3   14.45    9.60   0
   0  14  -3   29.52    9.23   0
   0  14   3   31.16   11.27   0
   1 -14   3    1.08    7.23   0
  -1 -14  -3   11.40    6.66   0
  -1 -14  -3    7.44    4.58   0
   1 -14   3    9.09   10.57   0
  -1  14  -3   -8.43    9.57   0
   1  14   3  -14.26    9.84   0
   2 -14   3   33.48    9.16   0
   2 -14   3    6.52   12.54   0
  -2  14  -3   37.64   11.72   0
   2  14   3    8.41   10.26   0
   3 -14   3    5.66   10.56   0
   3 -14   3   12.93   15.00   0
   3  14   3   26.94   11.29   0
   4 -14   3   43.29   18.12   0
   4 -14   3   28.97   12.26   0
   4  14   3   46.27   12.94   0
   5 -14   3   27.77   20.14   0
   5 -14   3   -5.04   12.85   0
   5  14   3   59.00   15.42   0
   5 -15  -3   23.73   14.78   0
   5 -15  -3   39.98   21.04   0
   5  15  -3    4.84   12.71   0
   4 -15  -3   10.43   14.11   0
   4 -15  -3   26.21   17.35   0
   4  15  -3   12.02   11.49   0
   3 -15  -3   -3.86   10.81   0
   3 -15  -3    0.99   15.81   0
  -3  15   3  -20.12   13.45   0
   3  15  -3  -22.65   10.01   0
  -2 -15   3    5.41    6.79   0
  -2 -15   3   20.95    6.35   0
   2 -15  -3    9.41   14.21   0
   2 -15  -3    0.67    9.15   0
   2  15  -3   16.51   10.41   0
  -2  15   3   13.94   13.46   0
  -1 -15   3  -14.11    9.17   0
   1 -15  -3    4.53    7.41   0
   1 -15  -3   22.13   11.60   0
  -1 -15   3    3.99    7.18   0
   1  15  -3    4.96   10.34   0
  -1  15   3   17.83   13.43   0
   0 -15  -3   -6.48    6.11   0
   0 -15   3   21.08   10.86   0
   0 -15   3   -2.23    7.29   0
   0 -15  -3    0.44    9.68   0
   0  15  -3   -2.47   10.74   0
   0  15   3    8.60   12.65   0
   1 -15   3   -2.58    8.40   0
  -1 -15  -3    4.35    7.28   0
  -1 -15  -3    3.09    5.08   0
   1 -15   3   14.13   12.08   0
  -1  15  -3   -2.26   11.57   0
   1  15   3  -12.63   11.48   0
   2 -15   3   31.55   14.23   0
   2 -15   3   12.17   10.03   0
  -2  15  -3   37.34   13.96   0
   2  15   3   20.33   12.60   0
   3 -15   3    4.08   12.20   0
   3 -15   3  -22.53   16.13   0
   3  15   3   28.93   13.56   0
   4 -15   3   27.70   13.95   0
   4 -15   3   42.60   19.70   0
   4  15   3   51.41   15.91   0
   4 -16  -3   28.66   20.26   0
   4 -16  -3   26.53   15.64   0
   4  16  -3    1.85   14.16   0
   3 -16  -3   11.83   17.88   0
   3 -16  -3   15.29   13.36   0
   3  16  -3   50.38   13.83   0
   2 -16  -3   -7.83   10.37   0
  -2 -16   3   13.83    6.48   0
  -2 -16   3   -1.94    6.99   0
   2 -16  -3   19.58   15.57   0
   2  16  -3    3.66   12.73   0
  -2  16   3   17.49   15.52   0
   1 -16  -3   27.95    8.87   0
   1 -16  -3   35.09   13.34   0
  -1 -16   3   11.94    8.35   0
  -1 -16   3   16.42   10.90   0
   1  16  -3   34.52   13.03   0
  -1  16   3   11.49   14.64   0
   0 -16  -3   -9.33   10.98   0
   0 -16  -3   23.67    7.62   0
   0 -16   3   42.65   12.84   0
   0 -16   3    2.81    8.82   0
   0  16   3   27.42   15.04   0
   0  16  -3    4.75   12.76   0
  -1 -16  -3   -9.07    6.03   0
  -1 -16  -3   -0.90    8.30   0
   1 -16   3    7.65   14.23   0
   1 -16   3   -4.51    9.96   0
   1  16   3    2.00   14.10   0
  -1  16  -3  -14.21   12.80   0
   2 -16   3   22.16   16.09   0
   2 -16   3   18.33   11.43   0
   2  16   3   -1.85   14.33   0
   3 -16   3   54.83   19.98   0
   3 -16   3   -0.35   13.91   0
   3  16   3    8.54   16.27   0
   3 -17  -3  -16.12   14.56   0
   3 -17  -3   -3.20   20.30   0
  -2 -17   3   16.31    6.24   0
   2 -17  -3   -3.71   11.91   0
   2 -17  -3   25.43   18.27   0
  -2 -17   3   -5.02    7.00   0
   2  17  -3    1.46   15.46   0
  -2  17   3   23.75   18.74   0
   1 -17  -3    6.51   14.64   0
  -1 -17   3   24.50    9.72   0
   1 -17  -3   19.89   10.13   0
  -1 -17   3   45.30   12.68   0
  -1  17   3  -22.08   17.44   0
   1  17  -3   10.43   15.38   0
   0 -17  -3   24.45   12.93   0
   0 -17   3    8.23   10.40   0
   0 -17  -3   -2.62    8.41   0
   0 -17   3    4.58   14.54   0
   0  17   3   24.51   17.41   0
   0  17  -3  -11.68   15.51   0
   1 -17   3   38.17   12.02   0
  -1 -17  -3   16.39    7.00   0
   1 -17   3   34.31   17.40   0
  -1 -17  -3   24.82    9.08   0
  -1  17  -3   10.48   16.67   0
   1  17   3   27.37   17.84   0
   2 -17   3   50.11   14.34   0
   2 -17   3   43.90   19.79   0
   2  17   3   30.67   18.63   0
   0 -18  -3   27.57   14.66   0
   9   0  -4   32.14   21.00   0
   8   0  -4   14.74   13.99   0
   7   0  -4   13.23    9.88   0
   6   0  -4  173.09   15.65   0
   5   0  -4   99.96   10.24   0
  -4   0   4  556.56   34.59   0
   4   0  -4  554.01   35.26   0
  -3   0   4  106.50    8.35   0
   3   0  -4  103.73    8.87   0
   2   0  -4   57.66    6.22   0
  -2   0   4   68.60    6.13   0
  -1   0   4   -0.58    2.62   0
   1   0  -4   -0.19    2.62   0
   0   0  -4  106.77    8.00   0
   0   0   4  114.77    8.17   0
  -1   0  -4  147.10    8.91   0
   1   0   4  114.86    9.08   0
  -2   0  -4  112.11    7.47   0
   2   0   4  106.64    7.88   0
  -3   0  -4    9.55    2.21   0
   3   0   4   10.09    2.77   0
   4   0   4   41.57    5.17   0
   5   0   4    9.35    3.89   0
   6   0   4   -2.31    4.83   0
   7   0   4    2.62    6.93   0
   8   0   4  -15.34   14.29   0
   8   0   4   17.87   10.48   0
   9  -1  -4    2.51   21.60   0
   9   1  -4   45.79   20.34   0
   8  -1  -4   23.95   14.57   0
   8   1  -4   15.00   13.68   0
   7  -1  -4   58.39   11.07   0
   7   1  -4   30.63   10.35   0
   6  -1  -4   15.23    7.69   0
   6   1  -4   17.59    7.06   0
   5  -1  -4    2.00    5.55   0
   5   1  -4   11.38    5.32   0
  -4  -1   4  205.35   13.58   0
   4  -1  -4  208.68   15.29   0
  -4   1   4  219.44   14.51   0
   4   1  -4  202.01   14.87   0
   3  -1  -4  132.34   10.62   0
  -3  -1   4  133.20    9.78   0
  -3   1   4  141.00   10.41   0
   3   1  -4  141.29   10.28   0
   2  -1  -4   79.86    7.58   0
  -2  -1   4   87.58    7.16   0
  -2   1   4   91.47    7.61   0
   2   1  -4   84.70    7.19   0
  -1  -1   4  177.68   12.17   0
   1  -1  -4  183.48   12.35   0
   1   1  -4  178.81   12.05   0
  -1   1   4  177.20   12.43   0
   0  -1   4  207.34   14.01   0
   0  -1  -4  207.15   13.91   0
   0   1  -4  215.70   13.89   0
   0   1   4  223.52   14.17   0
  -1  -1  -4  523.61   31.61   0
   1  -1   4  519.67   31.87   0
  -1   1  -4  504.07   31.66   0
   1   1   4  508.53   31.84   0
  -2  -1  -4    2.53    1.45   0
   2  -1   4    3.50    2.33   0
   2   1   4    1.44    2.18   0
  -2   1  -4    0.33    1.81   0
   3  -1   4   31.78    4.55   0
  -3   1  -4   36.11    4.11   0
   3   1   4   30.86    3.99   0
   4  -1   4   38.03    5.21   0
   4   1   4   40.44    4.92   0
   5  -1   4   14.76    4.35   0
   5   1   4    7.76    3.83   0
   6  -1   4   22.71    6.15   0
   6   1   4   23.71    5.42   0
   7  -1   4    8.87    7.28   0
   7   1   4    6.85    6.74   0
   8  -1   4  -20.37   10.24   0
   8  -1   4  -15.73   15.14   0
   8   1   4   -2.94   13.44   0
   8   1   4    8.46    9.43   0
   8  -2  -4  176.99   22.78   0
   8   2  -4  109.73   16.74   0
   7  -2  -4   57.02   12.29   0
   7   2  -4   55.93   10.62   0
   6  -2  -4  472.55   32.90   0
   6   2  -4  484.93   31.76   0
   5  -2  -4   47.14    7.75   0
   5   2  -4   38.91    6.23   0
   4  -2  -4   27.64    5.56   0
  -4   2   4   18.45    4.44   0
   4   2  -4   22.98    4.49   0
   3  -2  -4    4.00    3.92   0
  -3  -2   4    5.09    2.54   0
   3   2  -4    4.26    3.19   0
  -3   2   4    2.58    3.69   0
   2  -2  -4   87.27    7.74   0
  -2  -2   4   78.24    6.79   0
  -2   2   4   82.06    7.60   0
   2   2  -4   82.06    6.86   0
  -1  -2   4  585.57   36.17   0
   1  -2  -4  584.98   36.43   0
   1   2  -4  574.85   36.08   0
  -1   2   4  590.49   36.60   0
   0  -2   4   21.91    3.37   0
   0  -2  -4   20.32    3.34   0
   0   2   4   15.62    3.44   0
   0   2  -4   22.50    3.12   0
  -1  -2  -4  181.48   11.57   0
   1  -2   4  186.87   11.90   0
  -1   2  -4  176.61   11.70   0
   1   2   4  165.59   11.83   0
  -2  -2  -4  145.45    9.63   0
   2  -2   4  156.54   10.53   0
  -2   2  -4  159.33   10.38   0
   2   2   4  152.47   10.41   0
   3  -2   4  970.90   58.48   0
  -3   2  -4  924.25   58.29   0
   3   2   4  967.68   58.20   0
   4  -2   4    0.13    3.20   0
   4   2   4    1.04    2.72   0
   5  -2   4   21.12    5.25   0
   5   2   4   25.30    4.26   0
   6  -2   4    5.24    5.69   0
   6   2   4   15.38    5.00   0
   7  -2   4    3.56    7.52   0
   7   2   4   16.94    6.74   0
   8  -2   4   -0.70   17.04   0
   8  -2   4   -5.01   10.92   0
   8   2   4   13.70    9.61   0
   8  -3  -4  573.78   42.95   0
   8   3  -4  561.50   40.35   0
   7  -3  -4    8.83   11.02   0
   7   3  -4    1.95    8.76   0
   6  -3  -4  106.04   14.51   0
   6   3  -4  104.42   11.73   0
   5  -3  -4   -2.48    6.26   0
  -5   3   4    2.76    4.61   0
   5   3  -4   -0.63    4.64   0
   4  -3  -4  319.16   21.62   0
  -4   3   4  303.08   20.94   0
   4   3  -4  307.38   20.22   0
   3  -3  -4   46.61    6.35   0
  -3  -3   4   43.64    4.31   0
   3   3  -4   42.42    5.31   0
  -3   3   4   48.86    6.30   0
  -2  -3   4   10.41    3.04   0
   2  -3  -4   16.47    4.40   0
   2   3  -4   19.28    3.26   0
  -2   3   4   12.80    4.27   0
   1  -3  -4   70.41    6.73   0
  -1  -3   4   71.09    6.01   0
  -1   3   4   60.09    6.92   0
   1   3  -4   62.91    5.60   0
   0  -3  -4  120.41    8.33   0
   0  -3   4  104.79    8.05   0
   0   3  -4  108.06    7.87   0
   0   3   4  101.13    8.51   0
  -1  -3  -4  417.78   25.45   0
   1  -3   4  410.59   25.77   0
   1   3   4  404.48   25.76   0
  -1   3  -4  408.01   25.64   0
  -2  -3  -4   18.94    1.92   0
   2  -3   4   20.07    3.43   0
   2   3   4   18.78    3.13   0
  -2   3  -4   24.89    3.42   0
   3  -3   4  192.40   13.33   0
  -3   3  -4  196.72   13.21   0
   4  -3   4   37.90    5.12   0
   4   3   4   36.49    4.57   0
   5  -3   4  278.35   18.59   0
   5   3   4  256.71   17.37   0
   6  -3   4   -4.41    6.03   0
   6   3   4    4.15    4.45   0
   7  -3   4  -13.11   12.12   0
   7  -3   4    2.87    8.27   0
   7   3   4    8.07    6.34   0
   8  -3   4   -0.92   18.06   0
   8  -3   4    2.45   11.11   0
   8   3   4    8.36    9.56   0
   8  -4  -4  125.04   20.40   0
   8   4  -4  137.79   19.08   0
   7  -4  -4   12.77   12.50   0
   7   4  -4    7.58    8.34   0
   6  -4  -4   20.35    9.39   0
   6   4  -4   10.15    6.17   0
   5  -4  -4   14.33    7.31   0
  -5   4   4   24.51    6.04   0
   5   4  -4   16.46    4.75   0
   4  -4  -4   39.96    7.15   0
  -4   4   4   48.61    6.86   0
   4   4  -4   41.69    5.07   0
   3  -4  -4  103.37   10.57   0
  -3  -4   4  115.78    7.59   0
  -3   4   4  119.45   10.35   0
   3   4  -4  109.03    8.44   0
   2  -4  -4  239.33   17.30   0
  -2  -4   4  249.87   16.14   0
   2   4  -4  249.49   16.16   0
  -2   4   4  250.55   17.34   0
  -1  -4   4  133.84    9.08   0
   1  -4  -4  127.31    9.92   0
   1   4  -4  123.15    8.95   0
  -1   4   4  112.62   10.06   0
   0  -4  -4  604.49   37.22   0
   0  -4   4  575.71   37.10   0
   0   4  -4  606.92   37.03   0
   0   4   4  608.41   37.55   0
  -1  -4  -4   41.24    4.44   0
   1  -4   4   50.60    5.01   0
  -1   4  -4   47.57    4.79   0
   1   4   4   50.87    5.31   0
   2  -4   4  196.12   13.25   0
   2   4   4  202.51   13.04   0
  -2   4  -4  185.46   13.12   0
   3  -4   4   64.37    6.39   0
  -3   4  -4   63.85    6.35   0
   3   4   4   49.82    5.50   0
   4  -4   4   71.94    7.41   0
   4   4   4   60.44    6.04   0
   5  -4   4   30.81    6.08   0
   5   4   4   26.44    4.33   0
   6  -4   4   -5.42    6.66   0
   6   4   4    2.59    4.50   0
   7  -4   4   26.42    9.72   0
   7  -4   4   50.01   14.80   0
   7   4   4   35.96    7.06   0
   8  -4   4   40.34   12.75   0
   8  -4   4   43.97   20.54   0
   8   4   4    7.97    9.68   0
   8  -5  -4   24.87   18.40   0
   8  -5  -4   47.21   16.12   0
   8   5  -4   15.48   11.45   0
   7  -5  -4   51.52   13.81   0
   7   5  -4   41.39    8.69   0
   6  -5  -4   15.76    9.56   0
   6   5  -4   17.81    5.94   0
   5  -5  -4   98.07   13.24   0
  -5   5   4  108.16   11.24   0
   5   5  -4  109.79    9.44   0
   4  -5  -4   -3.24    6.10   0
  -4   5   4    2.48    5.17   0
   4   5  -4    6.01    3.46   0
  -3  -5   4   62.10    4.43   0
   3  -5  -4   66.20    8.25   0
   3   5  -4   63.46    6.04   0
  -3   5   4   67.58    8.37   0
   2  -5  -4  386.53   25.11   0
  -2  -5   4  377.67   23.75   0
   2   5  -4  373.94   23.78   0
  -2   5   4  366.21   25.07   0
  -1  -5   4  312.69   21.07   0
   1  -5  -4  329.27   21.82   0
  -1   5   4  330.24   22.06   0
   1   5  -4  343.40   21.01   0
   0  -5   4  474.56   29.41   0
   0  -5  -4  478.44   29.65   0
   0   5   4  446.99   29.93   0
   0   5  -4  471.59   29.30   0
   1  -5   4  303.32   19.20   0
   1   5   4  297.55   19.40   0
  -1   5  -4  286.59   19.05   0
   2  -5   4    3.92    2.92   0
   2   5   4    4.97    3.01   0
  -2   5  -4    0.63    2.89   0
   3  -5   4    3.37    3.60   0
   3   5   4    0.01    2.89   0
  -3   5  -4    0.97    3.57   0
   4  -5   4   17.25    4.90   0
   4   5   4   10.82    3.55   0
   5  -5   4   19.21    6.15   0
   5   5   4   20.88    4.33   0
   6  -5   4   12.04    7.52   0
   6  -5   4   27.88   11.47   0
   6   5   4   19.25    5.15   0
   7  -5   4    1.15   14.42   0
   7  -5   4  -16.10    9.48   0
   7   5   4   -2.41    6.32   0
   8  -5   4    1.15   21.43   0
   8  -6  -4   -6.19   16.18   0
   8  -6  -4  -14.72   19.07   0
   8   6  -4   -0.54   10.18   0
   7  -6  -4   20.87   13.94   0
   7   6  -4   19.59    7.59   0
   6  -6  -4   22.53   10.69   0
   6   6  -4    9.88    5.59   0
   5  -6  -4   52.28   10.59   0
   5   6  -4   54.52    7.35   0
  -5   6   4   65.23    9.27   0
   4  -6  -4   10.22    6.71   0
  -4   6   4    8.95    6.23   0
   4   6  -4    4.52    3.60   0
   3  -6  -4   36.83    7.16   0
   3   6  -4   37.63    4.55   0
  -3   6   4   33.45    6.60   0
   2  -6  -4   22.73    5.75   0
  -2  -6   4   21.80    3.82   0
  -2  -6   4   23.42    3.65   0
   2   6  -4   21.98    3.57   0
  -2   6   4   15.84    5.44   0
   1  -6  -4   87.17    8.47   0
  -1  -6   4   81.73    7.12   0
  -1   6   4   82.65    8.90   0
   1   6  -4   85.03    6.89   0
   0  -6  -4  441.50   27.40   0
   0  -6   4  413.89   27.05   0
   0   6  -4  431.89   27.02   0
   0   6   4  423.38   27.76   0
  -1  -6  -4    1.88    2.28   0
  -1  -6  -4   -2.99    2.49   0
   1  -6   4    2.79    2.85   0
   1   6   4    3.72    3.70   0
  -1   6  -4    5.67    2.86   0
   2  -6   4   17.27    3.89   0
  -2   6  -4   24.15    4.19   0
   2   6   4   21.41    4.05   0
   3  -6   4   19.79    4.70   0
   3   6   4   15.46    3.82   0
  -3   6  -4   20.06    4.59   0
   4  -6   4   10.84    5.07   0
   4   6   4    3.60    3.81   0
   5  -6   4   -2.06    9.02   0
   5  -6   4   -1.37    6.03   0
   5   6   4    5.94    4.17   0
   6  -6   4   -0.93   11.86   0
   6  -6   4   -5.80    7.78   0
   6   6   4    4.78    5.18   0
   7  -6   4   33.07   17.02   0
   7  -6   4   -3.07   10.43   0
   7   6   4   21.42    7.39   0
   8  -7  -4    0.20   21.00   0
   8  -7  -4  -11.67   16.16   0
   8   7  -4    6.18   10.01   0
   7  -7  -4   -9.03   14.46   0
   7  -7  -4   12.45   12.89   0
   7   7  -4    5.37    7.29   0
   6  -7  -4   10.80   11.52   0
   6   7  -4   -3.40    5.56   0
   5  -7  -4    9.70    9.34   0
  -5   7   4    3.75    7.81   0
   5   7  -4   -6.07    4.35   0
   4  -7  -4    0.17    7.01   0
   4   7  -4   -0.04    3.63   0
  -4   7   4    5.90    6.69   0
   3  -7  -4   31.41    7.67   0
   3   7  -4   34.20    4.23   0
  -3   7   4   17.95    6.57   0
   2  -7  -4  164.93   13.96   0
  -2  -7   4  166.14   11.89   0
  -2  -7   4  166.97   11.72   0
   2   7  -4  169.87   11.70   0
  -2   7   4  159.75   13.82   0
  -1  -7   4   16.00    4.34   0
  -1  -7   4   20.95    3.77   0
   1  -7  -4   12.43    5.06   0
  -1   7   4   16.31    5.77   0
   1   7  -4   12.89    3.43   0
   0  -7  -4  142.59   11.06   0
   0  -7   4  148.58   10.73   0
   0  -7  -4  144.88   11.34   0
   0   7   4  153.07   12.10   0
   0   7  -4  148.41   10.70   0
  -1  -7  -4    9.09    3.15   0
  -1  -7  -4    7.01    2.60   0
   1  -7   4    9.06    3.39   0
  -1   7  -4   15.35    3.67   0
   1   7   4    6.71    4.36   0
   2  -7   4    2.58    3.56   0
   2   7   4    2.80    3.98   0
  -2   7  -4    5.13    3.67   0
   3  -7   4   41.16    6.31   0
   3   7   4   40.84    5.47   0
  -3   7  -4   47.57    6.35   0
   4  -7   4    0.39    5.48   0
   4  -7   4    3.61    8.00   0
   4   7   4   -2.46    4.03   0
   5  -7   4    4.24    6.67   0
   5  -7   4    1.12    9.77   0
   5   7   4    6.11    4.83   0
   6  -7   4   12.42    8.56   0
   6  -7   4    7.49   13.25   0
   6   7   4    5.96    5.85   0
   7  -7   4   54.67   18.56   0
   7  -7   4   39.65   12.23   0
   7   7   4   18.61    7.79   0
   8  -8  -4    0.30   18.85   0
   8  -8  -4    8.60   21.73   0
   8   8  -4    0.75   10.48   0
   7  -8  -4    1.70   13.20   0
   7  -8  -4    1.92   16.86   0
   7   8  -4    5.49    7.77   0
   6  -8  -4    2.41   12.46   0
   6  -8  -4   10.21   11.27   0
   6   8  -4  -13.96    5.66   0
   5  -8  -4   12.84    9.86   0
   5  -8  -4   11.05    9.83   0
   5   8  -4   16.20    4.96   0
  -5   8   4    7.12    8.72   0
   4  -8  -4   -0.30    8.33   0
   4  -8  -4  -12.27    7.09   0
   4   8  -4    6.32    3.95   0
  -4   8   4    1.11    6.87   0
   3  -8  -4  -14.42    6.18   0
   3   8  -4   -4.11    3.27   0
  -3   8   4   13.35    6.35   0
   2  -8  -4   67.22    9.46   0
   2  -8  -4   98.36   10.78   0
  -2  -8   4   79.87    7.54   0
  -2  -8   4   79.39    7.30   0
   2   8  -4   77.44    7.22   0
  -2   8   4   77.03   10.20   0
  -1  -8   4   35.83    5.67   0
   1  -8  -4   40.18    6.82   0
  -1  -8   4   38.19    5.05   0
   1  -8  -4   38.17    5.76   0
   1   8  -4   35.65    4.81   0
  -1   8   4   36.87    7.19   0
   0  -8  -4   37.57    5.16   0
   0  -8   4   41.31    5.13   0
   0  -8  -4   44.53    5.97   0
   0  -8   4   40.62    6.36   0
   0   8   4   43.90    7.17   0
   0   8  -4   43.88    5.41   0
  -1  -8  -4   29.25    3.66   0
   1  -8   4   26.65    4.68   0
  -1  -8  -4   23.63    4.13   0
   1  -8   4   18.90    6.05   0
  -1   8  -4   31.12    4.92   0
   1   8   4   18.53    5.59   0
   2  -8   4    3.30    6.13   0
   2  -8   4    5.03    4.46   0
  -2   8  -4    4.99    4.32   0
   2   8   4    9.51    4.66   0
   3  -8   4   -5.82    4.45   0
   3  -8   4   15.38    7.56   0
   3   8   4   -2.54    4.48   0
  -3   8  -4   -2.98    5.01   0
   4  -8   4    2.00    6.10   0
   4  -8   4   -4.50    8.28   0
   4   8   4    5.28    4.92   0
   5  -8   4   87.36   13.71   0
   5  -8   4   84.00   10.50   0
   5   8   4   78.37    9.16   0
   6  -8   4   59.97   10.38   0
   6  -8   4   51.33   15.81   0
   6   8   4   36.11    7.36   0
   7  -8   4   -0.20   19.06   0
   7  -8   4   20.90   12.34   0
   7   8   4    9.12    8.06   0
   7  -9  -4   35.57   14.78   0
   7  -9  -4   34.75   17.82   0
   7   9  -4   28.42    8.29   0
   6  -9  -4   29.33   14.53   0
   6  -9  -4    6.39   11.41   0
   6   9  -4   10.44    6.17   0
   5  -9  -4   14.17   11.37   0
   5  -9  -4    1.06    8.85   0
   5   9  -4   -0.11    4.76   0
  -5   9   4   -5.22    9.09   0
   4  -9  -4   15.86    8.99   0
   4  -9  -4   -1.46    7.58   0
  -4   9   4    8.01    8.39   0
   4   9  -4    5.22    4.15   0
   3  -9  -4   34.22    9.06   0
   3  -9  -4   33.93    8.34   0
  -3   9   4   53.71    9.12   0
   3   9  -4   40.39    5.38   0
   2  -9  -4    2.15    5.60   0
  -2  -9   4    7.29    3.79   0
  -2  -9   4    5.53    4.15   0
   2  -9  -4    8.59    6.57   0
   2   9  -4    3.11    3.68   0
  -2   9   4   12.17    6.94   0
  -1  -9   4    6.94    5.02   0
   1  -9  -4   16.62    6.20   0
  -1  -9   4   14.27    3.99   0
   1  -9  -4   12.66    4.91   0
  -1   9   4   13.88    6.57   0
   1   9  -4   11.60    4.14   0
   0  -9   4   90.05   10.40   0
   0  -9  -4   79.24    8.32   0
   0  -9  -4   82.39    9.06   0
   0  -9   4  104.97    8.31   0
   0   9   4  100.38   10.46   0
   0   9  -4   88.47    8.62   0
  -1  -9  -4    0.14    2.83   0
   1  -9   4    3.53    6.32   0
   1  -9   4    3.82    4.18   0
  -1  -9  -4    5.56    3.64   0
   1   9   4    4.56    5.45   0
  -1   9  -4    8.69    4.35   0
   2  -9   4   -0.38    4.60   0
   2  -9   4    1.70    6.99   0
   2   9   4   -2.44    5.10   0
  -2   9  -4    4.23    5.04   0
   3  -9   4   36.47    8.99   0
   3  -9   4   16.06    5.82   0
   3   9   4   21.62    5.95   0
  -3   9  -4   19.56    6.39   0
   4  -9   4   17.48    9.99   0
   4  -9   4   25.70    7.43   0
   4   9   4   22.84    6.44   0
   5  -9   4   12.15    8.22   0
   5  -9   4   11.29   12.04   0
   6  -9   4   37.46   10.60   0
   6  -9   4    8.80   15.76   0
   6   9   4   23.27    7.83   0
   7  -9   4   54.49   14.29   0
   7  -9   4    9.58   23.04   0
   7   9   4   17.04    9.31   0
   7 -10  -4   29.35   20.23   0
   7 -10  -4    3.83   15.26   0
   7  10  -4   10.41    8.29   0
   6 -10  -4    7.72   11.47   0
   6 -10  -4   -0.34   14.51   0
   6  10  -4   -0.88    6.47   0
   5 -10  -4   37.05   13.40   0
   5 -10  -4   31.60   11.29   0
   5  10  -4   38.83    6.56   0
  -5  10   4   36.63   11.96   0
   4 -10  -4   -8.38    7.72   0
   4 -10  -4   13.57    9.32   0
   4  10  -4    1.96    4.65   0
  -4  10   4   -3.71    9.14   0
   3 -10  -4    2.83    7.60   0
   3 -10  -4    0.54    8.12   0
   3  10  -4    5.22    4.32   0
  -3  10   4   -2.47    7.98   0
   2 -10  -4   96.00   13.00   0
  -2 -10   4  112.88    9.08   0
  -2 -10   4   97.70    9.60   0
   2 -10  -4  101.05   11.45   0
  -2  10   4   89.31   12.03   0
   2  10  -4   91.30    9.14   0
   1 -10  -4    0.45    4.87   0
  -1 -10   4    4.87    5.33   0
   1 -10  -4    2.29    6.14   0
  -1 -10   4   -4.49    3.74   0
   1  10  -4    3.62    4.24   0
  -1  10   4    8.03    7.17   0
   0 -10   4   23.08    4.97   0
   0 -10  -4   14.21    6.04   0
   0 -10   4   20.07    6.69   0
   0 -10  -4   21.10    4.65   0
   0  10  -4   19.49    5.44   0
   0  10   4   13.38    7.27   0
   1 -10   4   -0.86    6.60   0
   1 -10   4   11.05    4.92   0
  -1 -10  -4   12.58    4.37   0
  -1 -10  -4    9.16    3.07   0
   1  10   4    6.25    6.28   0
  -1  10  -4    7.27    5.47   0
   2 -10   4   13.78    7.85   0
   2 -10   4   22.22    5.89   0
  -2  10  -4   17.87    6.15   0
   2  10   4   29.36    7.05   0
   3 -10   4    5.88    5.80   0
   3 -10   4   -8.98    8.68   0
  -3  10  -4    9.54    6.85   0
   3  10   4   -2.71    6.25   0
   4 -10   4   10.62   10.56   0
   4 -10   4   -0.09    7.50   0
   4  10   4    5.37    6.64   0
   5 -10   4    4.03   13.19   0
   5 -10   4   -0.07    9.01   0
   5  10   4   12.53    7.74   0
   6 -10   4   29.46   18.95   0
   6 -10   4   36.94   12.04   0
   6  10   4   25.96    9.32   0
   7 -11  -4    4.02   21.64   0
   7 -11  -4   34.60   17.28   0
   7  11  -4    5.54    9.07   0
   6 -11  -4   -9.45   15.40   0
   6 -11  -4   -6.42   12.80   0
   6  11  -4   -2.01    7.37   0
   5 -11  -4   27.40   14.31   0
   5 -11  -4   11.40   10.87   0
  -5  11   4   20.36   12.97   0
   5  11  -4    9.49    6.30   0
   4 -11  -4   20.28    9.75   0
   4 -11  -4   -8.13   10.41   0
   4  11  -4    3.69    5.41   0
  -4  11   4    8.55   10.31   0
   3 -11  -4   80.84   12.51   0
   3 -11  -4   80.62   10.86   0
  -3  11   4   79.76   12.39   0
   3  11  -4   69.91    8.94   0
   2 -11  -4    3.40    6.67   0
  -2 -11   4    2.53    5.09   0
  -2 -11   4    5.46    4.55   0
   2 -11  -4    8.45    8.98   0
   2  11  -4   -0.86    4.76   0
  -2  11   4    8.68    8.37   0
   1 -11  -4   19.64    6.09   0
  -1 -11   4   19.27    6.61   0
  -1 -11   4   11.59    4.99   0
   1 -11  -4    4.91    7.48   0
   1  11  -4    9.71    5.17   0
  -1  11   4   19.79    8.30   0
   0 -11  -4    8.60    4.79   0
   0 -11   4   15.94    7.12   0
   0 -11   4   15.40    5.11   0
   0 -11  -4   11.72    6.36   0
   0  11  -4   11.27    5.59   0
   0  11   4   14.72    7.88   0
   1 -11   4    1.94    4.97   0
   1 -11   4    0.50    7.40   0
  -1 -11  -4   -0.68    3.27   0
  -1 -11  -4   -7.54    4.45   0
   1  11   4   -8.76    6.63   0
  -1  11  -4    8.54    5.74   0
   2 -11   4    8.01    5.85   0
   2 -11   4   28.06    9.25   0
  -2  11  -4    5.65    6.89   0
   2  11   4    7.16    7.06   0
   3 -11   4    1.30   10.24   0
   3 -11   4    7.22    7.30   0
  -3  11  -4   16.10    8.41   0
   3  11   4   18.47    7.73   0
   4 -11   4   -1.88    7.88   0
   4 -11   4   26.85   12.55   0
   4  11   4    5.81    7.77   0
   5 -11   4    7.83   15.45   0
   5 -11   4   -1.75   10.27   0
   5  11   4    0.66    8.81   0
   6 -11   4    2.72   19.00   0
   6 -11   4   -5.18   12.51   0
   6  11   4    5.28   10.28   0
   6 -12  -4   19.61   17.99   0
   6 -12  -4   20.37   14.13   0
   6  12  -4   -3.18    8.03   0
   5 -12  -4  100.03   18.44   0
   5 -12  -4   98.06   14.77   0
   5  12  -4   92.17   11.73   0
   4 -12  -4   63.55   14.67   0
   4 -12  -4   57.54   11.98   0
   4  12  -4   71.54    9.97   0
  -4  12   4   73.28   14.32   0
   3 -12  -4  127.08   15.01   0
   3 -12  -4   93.26   14.37   0
   3  12  -4  110.47   11.34   0
  -3  12   4  121.36   15.47   0
  -2 -12   4   17.98    5.27   0
  -2 -12   4   11.85    6.25   0
   2 -12  -4   16.46    7.62   0
   2 -12  -4   10.59    9.80   0
   2  12  -4    8.83    5.99   0
  -2  12   4    6.97    9.50   0
   1 -12  -4   77.92   11.06   0
  -1 -12   4   76.23    9.17   0
   1 -12  -4   82.32   10.24   0
  -1 -12   4   67.08    9.74   0
  -1  12   4   79.67   11.99   0
   1  12  -4   86.09    9.66   0
   0 -12  -4   22.43    5.56   0
   0 -12  -4   29.75    7.64   0
   0 -12   4   37.98    6.73   0
   0 -12   4   24.82    8.49   0
   0  12   4   38.12    9.41   0
   0  12  -4   30.26    6.91   0
  -1 -12  -4   58.63    6.23   0
  -1 -12  -4   48.03    7.01   0
   1 -12   4   54.29    8.30   0
   1 -12   4   48.51   10.01   0
   1  12   4   40.36    9.37   0
  -1  12  -4   61.04    9.35   0
   2 -12   4   17.78    7.39   0
   2 -12   4   -4.37    9.83   0
   2  12   4   17.11    8.54   0
  -2  12  -4   29.47    8.48   0
   3 -12   4   37.18    9.60   0
   3 -12   4   37.29   12.43   0
  -3  12  -4   36.41    9.61   0
   3  12   4   30.23    9.32   0
   4 -12   4    6.56    8.90   0
   4 -12   4    5.22   13.09   0
   4  12   4    2.88    9.45   0
   5 -12   4  -10.07   10.83   0
   5 -12   4   12.96   17.34   0
   5  12   4   13.02   10.94   0
   6 -12   4   61.72   22.09   0
   6 -12   4   61.02   20.42   0
   6 -13  -4  -10.15   19.93   0
   6 -13  -4   63.79   16.75   0
   6  13  -4   55.25   10.78   0
   5 -13  -4   69.82   14.53   0
   5 -13  -4   55.08   18.03   0
   4 -13  -4  205.55   21.86   0
   4 -13  -4  181.19   25.48   0
   4  13  -4  240.37   17.94   0
  -4  13   4  226.96   24.60   0
   3 -13  -4    4.14    9.93   0
   3 -13  -4   12.16   12.20   0
  -3  13   4    0.21   11.35   0
   3  13  -4    2.17    6.60   0
   2 -13  -4    0.07   11.00   0
  -2 -13   4   -0.68    5.48   0
  -2 -13   4   -0.18    6.49   0
   2 -13  -4    2.62    7.36   0
   2  13  -4   -8.67    6.54   0
  -2  13   4   12.29   10.97   0
   1 -13  -4   15.52    8.96   0
  -1 -13   4   -2.57    5.74   0
  -1 -13   4   21.12    7.95   0
   1 -13  -4   -4.73    6.61   0
   1  13  -4    6.27    6.76   0
  -1  13   4    7.89    9.37   0
   0 -13  -4   -6.67    7.34   0
   0 -13  -4    5.60    5.03   0
   0 -13   4    2.43    6.44   0
   0 -13   4    3.53    8.62   0
   0  13   4    3.49    9.16   0
   0  13  -4   -1.34    7.39   0
  -1 -13  -4  149.25   12.74   0
   1 -13   4  149.52   14.76   0
  -1 -13  -4  151.67   11.29   0
   1 -13   4  146.55   17.34   0
  -1  13  -4  139.58   16.38   0
   1  13   4  154.72   16.99   0
   2 -13   4   68.04   13.39   0
   2 -13   4   57.10   10.48   0
   2  13   4   77.11   12.17   0
  -2  13  -4   68.53   12.10   0
   3 -13   4   14.84    9.13   0
   3 -13   4   38.03   13.05   0
   3  13   4   19.86    9.82   0
  -3  13  -4   13.84   10.93   0
   4 -13   4   22.12   11.44   0
   4 -13   4   33.62   15.47   0
   4  13   4   -1.08   10.94   0
   5 -13   4   21.87   12.95   0
   5 -13   4   25.46   19.05   0
   5  13   4    4.06   13.28   0
   5 -14  -4   13.06   13.75   0
   5 -14  -4  -28.27   18.31   0
   5  14  -4   -5.58    9.83   0
   4 -14  -4   74.38   16.98   0
   4 -14  -4   39.37   13.69   0
  -4  14   4   42.30   15.86   0
   4  14  -4   19.23    9.38   0
   3 -14  -4   13.00   10.27   0
   3 -14  -4    0.58   14.40   0
  -3  14   4   13.52   13.12   0
   3  14  -4   15.21    8.66   0
   2 -14  -4   65.67   11.04   0
   2 -14  -4   38.30   13.00   0
  -2 -14   4   53.43    7.84   0
  -2 -14   4   54.16    8.70   0
  -2  14   4   66.02   14.94   0
   2  14  -4   69.82   10.09   0
  -1 -14   4   25.64    9.53   0
   1 -14  -4   16.43    7.60   0
   1 -14  -4   25.69   10.62   0
  -1 -14   4   31.74    7.33   0
   1  14  -4   16.82    8.93   0
  -1  14   4   56.98   13.02   0
   0 -14   4   35.31    8.27   0
   0 -14   4   25.69   10.47   0
   0 -14  -4   29.70    6.54   0
   0 -14  -4   22.03    9.14   0
   0  14  -4   45.64   10.64   0
   0  14   4   31.76   11.17   0
  -1 -14  -4   54.60    7.10   0
   1 -14   4   36.51    9.04   0
   1 -14   4   50.16   12.14   0
  -1 -14  -4   27.32    7.31   0
   1  14   4   41.05   11.61   0
  -1  14  -4   49.23   11.21   0
   2 -14   4    9.42    9.00   0
   2 -14   4   20.75   13.06   0
  -2  14  -4    6.87   11.77   0
   2  14   4    6.13   10.93   0
   3 -14   4  144.13   17.23   0
   3 -14   4   74.10   17.31   0
   3  14   4  110.56   15.33   0
   4 -14   4   67.01   19.03   0
   4  14   4   95.79   15.97   0
   5 -14   4  -62.02   30.68   0
   5  14   4   -6.04   15.53   0
   4 -15  -4   -1.58   18.61   0
   4 -15  -4   12.65   14.49   0
   4  15  -4   27.46   11.47   0
  -4  15   4   11.02   17.52   0
   3 -15  -4  135.67   20.21   0
   3 -15  -4  120.16   16.20   0
   3  15  -4  131.78   17.62   0
  -3  15   4  131.64   19.73   0
   2 -15  -4   29.39   14.80   0
  -2 -15   4   45.27    8.62   0
  -2 -15   4   48.43    8.09   0
   2 -15  -4   36.92   10.50   0
   2  15  -4   43.37   10.94   0
  -2  15   4   15.20   14.47   0
  -1 -15   4   -3.49    7.81   0
   1 -15  -4   -4.41    7.41   0
   1 -15  -4   -5.62   11.54   0
  -1 -15   4   -0.95   10.01   0
  -1  15   4    2.34   13.31   0
   1  15  -4   -7.23   10.86   0
   0 -15   4   47.98   12.58   0
   0 -15   4   39.75    9.28   0
   0 -15  -4   27.15   10.81   0
   0 -15  -4   51.46    7.80   0
   0  15   4   48.32   13.63   0
   0  15  -4   70.77   12.87   0
   1 -15   4   64.40   14.39   0
  -1 -15  -4   55.53    8.53   0
  -1 -15  -4   59.64    8.25   0
   1 -15   4   40.08   10.54   0
   1  15   4   51.97   14.16   0
  -1  15  -4   44.73   13.37   0
   2 -15   4  100.85   18.35   0
   2 -15   4  163.55   18.20   0
  -2  15  -4  145.00   18.05   0
   2  15   4  103.99   16.34   0
   3 -15   4   -1.61   16.95   0
   3 -15   4   10.07   12.57   0
   3  15   4  -20.20   13.40   0
   4 -15   4   12.40   19.89   0
   4 -15   4   65.08   15.98   0
   4  15   4   10.88   15.48   0
   4 -16  -4   14.49   16.51   0
   4 -16  -4    1.34   20.46   0
   4  16  -4  -13.33   13.99   0
   3 -16  -4   37.17   18.12   0
   3 -16  -4   30.25   14.08   0
   3  16  -4   -6.59   13.26   0
  -3  16   4    5.17   17.64   0
   2 -16  -4   46.18   14.96   0
  -2 -16   4   -1.84    8.56   0
   2 -16  -4   -0.76   10.73   0
  -2 -16   4   18.58    7.69   0
  -2  16   4    5.81   16.35   0
   2  16  -4   16.97   13.25   0
   1 -16  -4   66.57   14.87   0
  -1 -16   4   63.69   13.27   0
  -1 -16   4   74.32   10.81   0
   1 -16  -4   87.06   11.05   0
  -1  16   4   59.19   17.33   0
   1  16  -4   71.71   14.99   0
   0 -16  -4   98.60   13.07   0
   0 -16   4   66.46   15.31   0
   0 -16   4   61.59   11.50   0
   0 -16  -4   72.11    9.48   0
   0  16  -4   81.99   14.93   0
   0  16   4   49.97   16.28   0
  -1 -16  -4   -7.49    5.97   0
   1 -16   4   24.74   14.89   0
  -1 -16  -4    1.50    7.78   0
   1 -16   4    5.58   10.87   0
  -1  16  -4    4.64   13.50   0
   2 -16   4   86.49   15.11   0
   2 -16   4   63.79   19.02   0
  -2  16  -4   72.18   17.32   0
   2  16   4   99.79   17.48   0
   3 -16   4   33.46   21.01   0
   3 -16   4   38.17   16.03   0
   3  16   4   22.01   17.22   0
  -2 -17   4   23.17    7.73   0
   2 -17  -4    0.31   11.99   0
  -2 -17   4    9.58    9.08   0
   2 -17  -4   26.47   18.26   0
  -2  17   4   37.10   19.75   0
   2  17  -4    5.65   15.19   0
   1 -17  -4   -4.02   10.14   0
  -1 -17   4    6.17   10.32   0
  -1 -17   4   13.02   13.33   0
   1 -17  -4    0.00   15.57   0
  -1  17   4    3.80   18.93   0
   1  17  -4   51.44   16.38   0
   0 -17   4    3.39   11.18   0
   0 -17   4   34.68   15.68   0
   0 -17  -4   50.69   13.14   0
   0  17   4   43.97   19.00   0
   0  17  -4   42.01   17.09   0
  -1 -17  -4   14.24    6.47   0
   1 -17   4  -12.48   18.16   0
  -1 -17  -4   28.38    8.73   0
   1 -17   4   13.51   12.43   0
  -1  17  -4  -17.28   16.54   0
   1  17   4   20.23   18.69   0
   2 -17   4   -7.90   14.92   0
   2 -17   4   25.11   20.14   0
   2  17   4   40.56   19.23   0
   8   0  -5   13.78   14.38   0
   7   0  -5   14.51   10.09   0
   6   0  -5   -0.73    7.47   0
   5   0  -5    4.72    5.66   0
  -5   0   5    1.29    3.59   0
  -4   0   5    2.25    3.52   0
   4   0  -5    1.16    4.58   0
   3   0  -5    0.34    3.68   0
  -3   0   5   -0.35    3.30   0
   2   0  -5    0.85    3.22   0
  -2   0   5    3.19    3.35   0
   1   0  -5   -1.51    2.86   0
  -1   0   5   -3.44    2.92   0
   0   0  -5   -0.17    2.49   0
   0   0   5    6.33    2.91   0
  -1   0  -5    2.72    2.21   0
   1   0   5    3.15    2.76   0
   2   0   5    3.26    2.83   0
  -2   0  -5   -0.28    1.92   0
  -3   0  -5    1.52    2.16   0
   3   0   5    2.66    2.95   0
   4   0   5   -1.35    3.58   0
   5   0   5    1.05    4.57   0
   6   0   5   -1.19    5.83   0
   7   0   5    0.99    7.69   0
   8   0   5   -4.72   11.36   0
   8  -1  -5    2.72   14.67   0
   8   1  -5   -2.62   13.59   0
   7  -1  -5    9.95   10.74   0
   7   1  -5   -4.02   10.08   0
   6  -1  -5   89.66   12.50   0
   6   1  -5   69.72   10.08   0
   5  -1  -5    0.64    6.15   0
  -5   1   5    6.41    4.21   0
   5   1  -5   12.00    5.74   0
  -4  -1   5   23.10    3.80   0
   4  -1  -5   16.92    5.41   0
  -4   1   5   11.45    4.39   0
   4   1  -5   16.77    4.87   0
   3  -1  -5   39.26    5.91   0
  -3  -1   5   39.98    5.15   0
   3   1  -5   47.61    5.90   0
  -3   1   5   44.64    5.82   0
   2  -1  -5   40.93    5.37   0
  -2  -1   5   41.13    5.06   0
   2   1  -5   36.48    4.92   0
  -2   1   5   34.95    5.34   0
   1  -1  -5  200.34   13.97   0
  -1  -1   5  202.45   13.91   0
  -1   1   5  201.94   14.10   0
   1   1  -5  205.82   13.72   0
   0  -1   5   85.82    7.10   0
   0  -1  -5   81.78    6.97   0
   0   1  -5   83.57    6.76   0
   0   1   5   85.06    7.25   0
  -1  -1  -5  577.94   34.74   0
   1  -1   5  507.65   34.92   0
  -1   1  -5  603.77   34.83   0
   1   1   5  557.73   35.03   0
   2  -1   5   53.79    5.84   0
  -2  -1  -5   63.04    4.93   0
  -2   1  -5   66.18    5.40   0
   2   1   5   69.98    6.18   0
   3  -1   5   15.79    3.76   0
  -3  -1  -5   18.88    2.38   0
   3   1   5   16.38    3.58   0
  -3   1  -5   14.05    3.07   0
   4  -1   5   18.54    4.09   0
   4   1   5   10.28    3.89   0
   5  -1   5    6.29    4.78   0
   5   1   5    2.66    4.37   0
   6  -1   5   18.55    6.52   0
   6   1   5   10.63    5.86   0
   7  -1   5   11.33    8.55   0
   7   1   5   25.11    8.16   0
   8  -1   5    0.71   17.32   0
   8  -1   5   20.53   12.06   0
   8   1   5   15.11   11.87   0
   8  -2  -5   17.15   15.39   0
   8   2  -5   18.19   13.44   0
   7  -2  -5   69.41   12.78   0
   7   2  -5   66.19   11.48   0
   6  -2  -5    1.87    8.19   0
   6   2  -5   14.92    7.14   0
   5  -2  -5   -0.37    6.43   0
   5   2  -5   -4.26    5.01   0
  -5   2   5    6.83    4.95   0
  -4  -2   5   -1.64    2.70   0
   4  -2  -5   -3.26    4.97   0
   4   2  -5    0.20    4.05   0
  -4   2   5   -3.58    3.88   0
   3  -2  -5  117.48   10.59   0
  -3  -2   5  127.48    9.43   0
   3   2  -5  129.64    9.81   0
  -3   2   5  111.38   10.37   0
   2  -2  -5  141.37   11.17   0
  -2  -2   5  136.39   10.52   0
   2   2  -5  138.84   10.33   0
  -2   2   5  149.04   11.20   0
  -1  -2   5   30.19    4.36   0
   1  -2  -5   28.12    4.61   0
   1   2  -5   35.26    4.35   0
  -1   2   5   32.15    4.96   0
   0  -2  -5    3.92    2.82   0
   0  -2   5    4.92    3.03   0
   0   2  -5    4.58    2.67   0
   0   2   5    4.31    3.17   0
   1  -2   5 1145.66   69.61   0
  -1   2  -5 1120.77   69.37   0
   1   2   5 1147.13   69.60   0
   2  -2   5  103.64    7.82   0
  -2  -2  -5   93.60    6.55   0
  -2   2  -5  106.71    7.28   0
   2   2   5   72.02    7.56   0
   3  -2   5  126.92    9.63   0
   3   2   5  126.85    9.50   0
  -3   2  -5  122.94    9.35   0
   4  -2   5   31.15    5.10   0
   4   2   5   27.76    4.49   0
   5  -2   5   10.40    5.11   0
   5   2   5   10.46    4.44   0
   6  -2   5    3.31    6.66   0
   6   2   5   12.07    5.66   0
   7  -2   5   59.38   10.48   0
   7   2   5   65.48    9.51   0
   8  -2   5   -4.88   18.32   0
   8  -2   5   31.59   12.77   0
   8   2   5   20.22   10.94   0
   8  -3  -5  129.00   20.90   0
   8   3  -5  161.46   21.29   0
   7  -3  -5   24.11   12.22   0
   7   3  -5   26.99    9.67   0
   6  -3  -5   91.23   12.06   0
   6   3  -5   74.62    9.50   0
   5  -3  -5  280.72   21.56   0
   5   3  -5  281.77   19.79   0
  -5   3   5  293.28   20.10   0
   4  -3  -5   10.96    5.84   0
  -4  -3   5    9.56    2.26   0
   4   3  -5   15.28    4.47   0
  -4   3   5   15.58    5.13   0
   3  -3  -5    7.67    4.96   0
  -3  -3   5    1.90    3.04   0
  -3   3   5    0.27    4.22   0
   3   3  -5   -0.19    3.41   0
   2  -3  -5   30.49    5.31   0
  -2  -3   5   28.06    4.22   0
  -2   3   5   25.11    5.22   0
   2   3  -5   27.65    4.21   0
  -1  -3   5  353.45   23.76   0
   1  -3  -5  376.68   24.20   0
  -1   3   5  380.77   24.42   0
   1   3  -5  380.43   23.74   0
   0  -3  -5  300.21   18.54   0
   0  -3   5  268.58   18.38   0
   0   3   5  281.51   18.69   0
   0   3  -5  277.25   18.22   0
  -1  -3  -5  174.38   11.12   0
   1  -3   5  157.70   11.56   0
  -1   3  -5  168.36   11.26   0
   1   3   5  151.41   11.60   0
   2  -3   5   34.25    4.49   0
  -2  -3  -5   24.73    3.06   0
   2   3   5   26.88    4.15   0
  -2   3  -5   35.41    4.27   0
   3  -3   5  434.88   27.06   0
  -3   3  -5  410.71   26.78   0
   4  -3   5   74.49    7.56   0
  -4   3  -5   68.30    7.41   0
   4   3   5   51.67    6.66   0
   5  -3   5   -5.84    5.10   0
   5   3   5   -5.60    4.25   0
   6  -3   5   -0.84    6.92   0
   6   3   5   -0.48    5.50   0
   7  -3   5   49.29   10.43   0
   7   3   5   40.26    8.73   0
   8  -4  -5   62.83   19.20   0
   8   4  -5   54.01   13.64   0
   7  -4  -5  -23.34   11.99   0
   7   4  -5   11.55    8.90   0
   6  -4  -5  125.82   16.37   0
   6   4  -5  134.49   13.03   0
   5  -4  -5   40.62    8.59   0
  -5   4   5   21.16    6.63   0
   5   4  -5   31.09    5.81   0
   4  -4  -5   50.83    8.14   0
   4   4  -5   48.01    6.75   0
  -4   4   5   59.04    7.63   0
   3  -4  -5  343.98   23.84   0
  -3  -4   5  340.28   22.07   0
   3   4  -5  347.03   22.39   0
  -3   4   5  354.64   23.60   0
  -2  -4   5  187.66   13.33   0
   2  -4  -5  198.30   14.63   0
   2   4  -5  198.96   13.37   0
  -2   4   5  189.49   14.61   0
  -1  -4   5    3.36    3.26   0
   1  -4  -5    3.64    3.76   0
   1   4  -5    5.74    2.83   0
  -1   4   5    7.67    4.19   0
   0  -4  -5    7.86    3.38   0
   0  -4   5   11.24    3.30   0
   0   4   5    6.47    3.95   0
   0   4  -5   12.04    2.98   0
   1  -4   5  361.04   24.32   0
  -1  -4  -5  398.70   23.99   0
   1   4   5  368.95   24.43   0
  -1   4  -5  391.71   24.18   0
   2  -4   5  119.38    8.78   0
  -2  -4  -5   90.19    7.04   0
   2   4   5  122.13    8.83   0
  -2   4  -5  111.60    8.43   0
   3  -4   5    4.69    3.73   0
   3   4   5    0.29    3.54   0
  -3   4  -5    3.24    3.41   0
   4  -4   5   21.53    5.45   0
  -4   4  -5   27.60    5.41   0
   4   4   5   20.24    4.62   0
   5  -4   5   10.37    5.79   0
   5   4   5   20.10    5.16   0
   6  -4   5   28.73    8.01   0
   6   4   5   18.54    6.24   0
   7  -4   5   10.79   14.91   0
   7  -4   5    5.20    9.82   0
   7   4   5   14.77    7.79   0
   8  -5  -5    9.85   18.24   0
   8   5  -5   18.60   11.31   0
   7  -5  -5   26.58   14.23   0
   7   5  -5   36.48    9.07   0
   6  -5  -5    4.05   10.17   0
   6   5  -5   -1.13    6.09   0
   5  -5  -5   -5.43    7.61   0
   5   5  -5    0.71    4.71   0
  -5   5   5    3.58    6.60   0
   4  -5  -5  188.58   15.55   0
  -4   5   5  158.22   14.40   0
   4   5  -5  183.46   13.02   0
   3  -5  -5    6.17    5.33   0
  -3  -5   5    3.70    2.89   0
  -3   5   5    2.04    5.23   0
   3   5  -5    4.80    3.50   0
  -2  -5   5  255.26   16.52   0
   2  -5  -5  260.57   17.83   0
  -2   5   5  205.49   17.54   0
   2   5  -5  261.38   16.50   0
   1  -5  -5  318.40   21.11   0
  -1  -5   5  309.32   20.44   0
  -1   5   5  303.44   21.36   0
   1   5  -5  319.81   20.28   0
   0  -5   5  481.97   30.26   0
   0  -5  -5  479.50   30.33   0
   0   5   5  463.11   30.82   0
   0   5  -5  489.34   30.11   0
  -1  -5  -5    1.86    2.65   0
   1  -5   5    6.16    3.25   0
   1   5   5    1.89    3.73   0
  -1   5  -5    6.75    2.81   0
  -2  -5  -5    5.66    1.71   0
  -2  -5  -5    5.33    1.51   0
   2  -5   5    9.19    3.46   0
   2   5   5    2.82    3.58   0
  -2   5  -5    5.43    3.18   0
   3  -5   5  248.34   17.28   0
  -3   5  -5  245.64   17.22   0
   3   5   5  254.40   16.84   0
   4  -5   5   74.63    8.61   0
  -4   5  -5   79.56    8.06   0
   4   5   5   55.88    7.49   0
   5  -5   5   -5.47    6.11   0
   5   5   5   -0.42    5.09   0
   6  -5   5   17.83    8.35   0
   6   5   5    1.59    6.14   0
   7  -5   5    9.86   16.89   0
   7  -5   5   15.48   11.00   0
   7   5   5   26.30    8.97   0
   8  -6  -5    4.70   20.04   0
   8  -6  -5    4.10   18.00   0
   8   6  -5   32.40   11.50   0
   7  -6  -5   30.38   15.73   0
   7   6  -5   54.12    9.22   0
   6  -6  -5   19.31   11.42   0
   6   6  -5   30.72    6.77   0
   5  -6  -5   -1.84    8.22   0
  -5   6   5    4.78    7.33   0
   5   6  -5   -0.07    4.98   0
   4  -6  -5   93.73   11.86   0
  -4   6   5   79.80   10.91   0
   4   6  -5   70.65    8.06   0
  -3  -6   5   34.48    4.16   0
   3  -6  -5   28.19    7.07   0
  -3  -6   5   32.66    4.08   0
  -3   6   5   33.35    7.22   0
   3   6  -5   32.85    4.72   0
  -2  -6   5  833.30   50.84   0
   2  -6  -5  765.86   51.87   0
   2   6  -5  839.78   50.80   0
  -2   6   5  847.85   52.14   0
   1  -6  -5   81.67    8.13   0
  -1  -6   5   71.18    7.10   0
   1   6  -5   69.81    6.66   0
  -1   6   5   66.17    8.65   0
   0  -6   5   39.53    5.36   0
   0  -6  -5   38.50    5.46   0
   0   6   5   49.42    6.62   0
   0   6  -5   38.08    5.23   0
   1  -6   5  258.91   17.77   0
  -1   6  -5  268.38   17.63   0
   1   6   5  264.46   18.17   0
   2  -6   5  168.33   12.49   0
  -2   6  -5  168.68   12.30   0
   2   6   5  165.02   12.52   0
   3  -6   5    7.92    4.60   0
  -3   6  -5   -0.80    4.25   0
   3   6   5   -1.37    4.03   0
   4  -6   5    5.70    5.26   0
  -4   6  -5   -9.30    5.39   0
   4   6   5    5.47    4.63   0
   5  -6   5   79.46   10.95   0
   5   6   5   82.69    9.43   0
   6  -6   5   42.45    9.77   0
   6  -6   5   56.65   14.25   0
   6   6   5   60.68    8.29   0
   7  -6   5  -12.70   11.28   0
   7  -6   5   16.09   17.44   0
   7   6   5   15.37    9.12   0
   8  -7  -5   53.28   20.08   0
   8  -7  -5    9.51   21.50   0
   8   7  -5   21.11   11.61   0
   7  -7  -5   -0.67   14.93   0
   7   7  -5    9.04    8.25   0
   6  -7  -5   20.40   12.48   0
   6   7  -5    6.22    6.51   0
   5  -7  -5  113.25   13.83   0
   5   7  -5   68.37    9.24   0
  -5   7   5   94.70   11.81   0
   4  -7  -5  383.56   27.72   0
   4   7  -5  385.67   24.98   0
  -4   7   5  380.18   27.24   0
   3  -7  -5  188.80   16.52   0
  -3  -7   5  192.82   13.02   0
  -3  -7   5  199.12   13.04   0
   3   7  -5  202.66   13.75   0
  -3   7   5  173.68   16.12   0
  -2  -7   5  396.54   25.88   0
  -2  -7   5  402.57   25.77   0
   2  -7  -5  384.11   27.37   0
  -2   7   5  390.27   27.51   0
   2   7  -5  429.51   25.85   0
   1  -7  -5  397.17   26.57   0
  -1  -7   5  388.64   25.54   0
  -1   7   5  403.99   26.93   0
   1   7  -5  400.38   25.48   0
   0  -7   5  180.14   13.12   0
   0  -7  -5  182.78   13.41   0
   0   7  -5  190.74   13.00   0
   0   7   5  174.05   14.42   0
  -1  -7  -5    8.92    3.05   0
   1  -7   5    9.51    3.84   0
  -1  -7  -5    2.90    3.17   0
   1   7   5    4.68    4.66   0
  -1   7  -5    4.27    3.63   0
  -2  -7  -5   57.08    4.42   0
   2  -7   5   71.21    7.70   0
  -2   7  -5   68.26    7.55   0
   2   7   5   73.97    8.03   0
   3  -7   5  120.65   10.79   0
  -3   7  -5  109.14   11.08   0
   3   7   5  124.52   10.32   0
   4  -7   5  128.42   12.64   0
  -4   7  -5  148.11   13.25   0
   4   7   5  132.92   11.73   0
   5  -7   5   -1.59   10.67   0
   5  -7   5    2.45    7.15   0
   5   7   5    3.26    6.21   0
   6  -7   5   -6.18   13.74   0
   6  -7   5   -3.23    9.41   0
   6   7   5   19.93    7.56   0
   7  -7   5    5.01   12.51   0
   7  -7   5   23.85   19.80   0
   7   7   5    2.49    9.80   0
   8  -8  -5   -7.30   23.22   0
   7  -8  -5   89.42   19.44   0
   7  -8  -5   71.72   16.39   0
   7   8  -5   59.24   10.48   0
   6  -8  -5   66.93   14.64   0
   6   8  -5   45.31    7.95   0
   5  -8  -5   44.65   11.94   0
  -5   8   5   51.15   10.75   0
   5   8  -5   49.70    6.89   0
   4  -8  -5  137.92   15.90   0
   4   8  -5  146.93   11.46   0
  -4   8   5  127.55   15.32   0
   3  -8  -5  194.87   18.21   0
  -3  -8   5  231.61   14.64   0
  -3  -8   5  216.05   14.51   0
  -3   8   5  229.58   18.40   0
   3   8  -5  219.99   15.35   0
  -2  -8   5  128.26   11.22   0
  -2  -8   5  143.50   10.81   0
   2  -8  -5  148.99   13.58   0
  -2   8   5  126.23   13.44   0
   2   8  -5  140.14   10.52   0
   1  -8  -5  122.99   11.70   0
  -1  -8   5  105.04   10.85   0
  -1  -8   5  120.84    9.84   0
  -1   8   5  121.98   12.29   0
   1   8  -5  125.89    9.75   0
   0  -8  -5   48.10    6.37   0
   0  -8   5   42.45    5.64   0
   0  -8  -5   48.13    5.96   0
   0   8   5   31.04    7.13   0
   0   8  -5   45.67    5.55   0
   1  -8   5  438.25   27.82   0
  -1  -8  -5  429.41   26.92   0
   1   8   5  396.34   28.19   0
  -1   8  -5  442.87   27.78   0
   2  -8   5  205.94   15.19   0
   2   8   5  205.14   15.50   0
  -2   8  -5  198.72   15.12   0
   3  -8   5   41.83    7.09   0
   3  -8   5   38.13    8.88   0
  -3   8  -5   38.44    6.85   0
   3   8   5   43.21    6.81   0
   4  -8   5   10.36    6.56   0
   4  -8   5   -2.98    9.24   0
   4   8   5   10.28    5.84   0
  -4   8  -5   -3.70    7.04   0
   5  -8   5  382.02   30.98   0
   5  -8   5  403.23   28.02   0
   6  -8   5   72.71   17.23   0
   6  -8   5   72.22   11.69   0
   6   8   5   50.93    9.39   0
   7  -8   5   30.23   20.96   0
   7  -8   5   24.64   14.32   0
   7   8   5   16.75   10.75   0
   7  -9  -5   49.75   19.29   0
   7  -9  -5   26.06   15.18   0
   7   9  -5    9.01    8.81   0
   6  -9  -5   51.90   14.68   0
   6  -9  -5   67.34   16.75   0
   6   9  -5   53.39    8.35   0
   5  -9  -5   97.87   14.33   0
   5  -9  -5   90.13   14.63   0
  -5   9   5   85.17   13.59   0
   5   9  -5   93.20   10.08   0
   4  -9  -5   74.90   12.45   0
   4  -9  -5   98.70   13.12   0
   4   9  -5   91.93    9.41   0
  -4   9   5  100.12   13.12   0
  -3  -9   5   37.76    4.47   0
   3  -9  -5   41.56    9.80   0
   3  -9  -5   34.62    9.16   0
  -3  -9   5   35.68    4.30   0
  -3   9   5   29.93    8.93   0
   3   9  -5   39.06    5.79   0
   2  -9  -5   37.96    8.71   0
  -2  -9   5   49.48    6.35   0
   2  -9  -5   39.16    8.26   0
  -2  -9   5   40.99    5.95   0
  -2   9   5   37.11    8.78   0
   2   9  -5   44.91    5.86   0
  -1  -9   5  423.44   27.18   0
   1  -9  -5  437.83   28.58   0
  -1  -9   5  396.58   27.85   0
   1  -9  -5  407.22   27.71   0
   1   9  -5  438.17   27.24   0
  -1   9   5  407.67   29.06   0
   0  -9  -5  236.73   18.29   0
   0  -9  -5  256.90   17.81   0
   0  -9   5  253.08   17.90   0
   0  -9   5  267.30   19.41   0
   0   9  -5  273.86   18.02   0
   0   9   5  273.07   19.58   0
  -1  -9  -5   35.68    5.21   0
   1  -9   5   39.95    6.40   0
  -1  -9  -5   40.37    5.53   0
   1  -9   5   43.05    8.39   0
  -1   9  -5   41.59    6.53   0
   1   9   5   32.18    7.32   0
   2  -9   5   50.44    9.26   0
   2  -9   5   52.43    7.28   0
  -2   9  -5   48.65    7.57   0
   2   9   5   49.12    7.91   0
   3  -9   5  308.46   24.19   0
   3  -9   5  318.75   21.91   0
   3   9   5  280.98   21.51   0
  -3   9  -5  317.98   22.03   0
   4  -9   5    2.93    7.36   0
   4  -9   5    1.25   10.22   0
  -4   9  -5   -9.18    7.79   0
   4   9   5   -0.87    6.44   0
   5  -9   5   34.40    9.37   0
   5  -9   5   31.42   14.15   0
   5   9   5   42.95    8.32   0
   6  -9   5  159.99   20.01   0
   6  -9   5  136.09   22.10   0
   6   9   5  185.35   16.70   0
   7 -10  -5   27.97   17.12   0
   7 -10  -5   43.03   20.92   0
   7  10  -5   41.39    9.85   0
   6 -10  -5   -0.01   15.05   0
   6 -10  -5   34.40   14.15   0
   6  10  -5   26.64    7.77   0
   5 -10  -5   -6.39   12.89   0
   5 -10  -5    5.21   10.49   0
  -5  10   5   -6.50   10.68   0
   5  10  -5   13.69    6.20   0
   4 -10  -5   78.07   13.57   0
   4 -10  -5   94.81   12.60   0
   4  10  -5   65.64    8.88   0
  -4  10   5   76.56   12.65   0
  -3 -10   5  223.84   14.59   0
   3 -10  -5  196.63   19.81   0
  -3 -10   5  211.01   14.39   0
   3 -10  -5  221.03   18.99   0
   3  10  -5  232.81   16.01   0
  -3  10   5  228.09   19.86   0
   2 -10  -5   93.58   11.93   0
   2 -10  -5   91.66   10.48   0
  -2 -10   5  105.95    9.47   0
  -2 -10   5   97.76   10.10   0
  -2  10   5   86.29   12.17   0
   2  10  -5   95.11    9.20   0
  -1 -10   5   55.91    8.27   0
   1 -10  -5   61.30    9.35   0
   1 -10  -5   65.84    8.24   0
  -1 -10   5   61.23    7.28   0
  -1  10   5   59.79    9.70   0
   1  10  -5   59.31    8.04   0
   0 -10  -5   91.16   10.41   0
   0 -10   5  102.87    9.79   0
   0 -10   5  105.19   12.06   0
   0 -10  -5   90.20    9.46   0
   0  10   5   92.65   12.73   0
   0  10  -5  101.42    9.97   0
  -1 -10  -5  301.17   20.02   0
   1 -10   5  308.86   21.47   0
   1 -10   5  297.44   23.26   0
   1  10   5  317.72   22.76   0
  -1  10  -5  315.90   21.62   0
   2 -10   5   47.43   10.37   0
   2 -10   5   62.40    8.03   0
   2  10   5   50.95    8.65   0
  -2  10  -5   48.32    8.10   0
   3 -10   5   -5.82    9.06   0
   3 -10   5   13.05    6.62   0
   3  10   5   10.47    7.21   0
  -3  10  -5   -4.70    6.76   0
   4 -10   5   58.91    9.74   0
   4 -10   5   49.38   13.37   0
  -4  10  -5   50.17   10.29   0
   4  10   5   42.07    8.86   0
   5 -10   5    5.60    9.12   0
   5 -10   5   10.34   15.00   0
   5  10   5    4.16    8.67   0
   6 -10   5   -8.24   19.45   0
   6 -10   5   14.28   13.17   0
   6  10   5   15.43   10.64   0
   7 -11  -5   13.13   21.28   0
   6 -11  -5   17.45   17.70   0
   6 -11  -5   24.73   14.24   0
   6  11  -5    1.69    8.34   0
   5 -11  -5   34.48   15.83   0
   5 -11  -5   71.12   13.88   0
   5  11  -5   52.93    8.41   0
  -5  11   5   56.89   14.56   0
   4 -11  -5   -3.76   11.55   0
   4 -11  -5   12.68    9.66   0
  -4  11   5   -2.64   10.22   0
   4  11  -5    6.38    5.96   0
   3 -11  -5  122.34   17.24   0
  -3 -11   5  128.63    9.22   0
   3 -11  -5  151.16   15.54   0
  -3 -11   5  129.07    9.35   0
   3  11  -5  136.27   11.92   0
  -3  11   5  130.38   17.59   0
   2 -11  -5   -1.23    8.38   0
  -2 -11   5   -3.53    5.58   0
   2 -11  -5   -0.35    7.43   0
  -2 -11   5    6.68    5.01   0
   2  11  -5    7.21    5.15   0
  -2  11   5    6.17    8.04   0
   1 -11  -5  327.33   23.03   0
   1 -11  -5  341.52   24.20   0
  -1 -11   5  313.61   23.33   0
  -1 -11   5  336.29   22.39   0
   1  11  -5  308.84   22.26   0
  -1  11   5  319.95   24.96   0
   0 -11  -5   96.88   11.28   0
   0 -11   5   80.13   10.93   0
   0 -11   5   87.22    9.75   0
   0 -11  -5  100.15    9.67   0
   0  11   5  106.65   12.11   0
   0  11  -5   75.39   10.34   0
   1 -11   5   43.08    7.48   0
   1 -11   5   39.50    9.69   0
  -1 -11  -5   38.25    5.08   0
  -1 -11  -5   57.31    7.19   0
   1  11   5   42.95    9.16   0
  -1  11  -5   49.69    7.71   0
   2 -11   5   92.37   10.87   0
   2 -11   5  112.99   15.22   0
  -2  11  -5  104.80   11.58   0
   2  11   5   89.64   12.94   0
   3 -11   5   80.44   10.59   0
   3 -11   5   90.56   13.80   0
   3  11   5   81.66   11.12   0
  -3  11  -5   81.06   11.59   0
   4 -11   5   75.11   15.33   0
   4 -11   5   81.01   11.80   0
   4  11   5  105.79   12.03   0
   5 -11   5   11.96   10.64   0
   5 -11   5   37.13   16.69   0
   5  11   5   -4.40    9.82   0
   6 -11   5   28.47   14.87   0
   6 -11   5   72.19   22.18   0
   6  11   5   78.41   13.51   0
   6 -12  -5  -15.25   19.45   0
   6 -12  -5   39.74   15.11   0
   6  12  -5   29.35    9.30   0
   5 -12  -5   10.92   15.30   0
   5 -12  -5    7.26   12.02   0
   5  12  -5    9.38    7.70   0
  -5  12   5   -3.48   13.58   0
   4 -12  -5   -0.91   10.87   0
   4 -12  -5    4.83   12.26   0
   4  12  -5    3.18    6.79   0
  -4  12   5  -10.31   12.03   0
   3 -12  -5    5.38   11.34   0
   3 -12  -5   -6.87    9.24   0
  -3  12   5    5.20   10.26   0
   3  12  -5   -2.22    5.78   0
  -2 -12   5   21.38    6.94   0
  -2 -12   5   29.02    6.42   0
   2 -12  -5   33.04   10.45   0
   2 -12  -5   17.99    8.51   0
   2  12  -5   19.69    6.30   0
  -2  12   5    8.27    9.96   0
   1 -12  -5  191.31   15.61   0
  -1 -12   5  213.97   15.35   0
  -1 -12   5  183.07   16.76   0
   1 -12  -5  170.92   16.76   0
   1  12  -5  166.66   15.38   0
  -1  12   5  181.20   18.67   0
   0 -12   5   11.74    6.30   0
   0 -12   5    2.92    8.30   0
   0 -12  -5    1.94    6.99   0
   0 -12  -5    9.69    5.46   0
   0  12   5   11.47    8.90   0
   0  12  -5   13.79    6.84   0
   1 -12   5  209.75   19.60   0
   1 -12   5  223.91   17.02   0
  -1 -12  -5  202.11   14.31   0
  -1  12  -5  222.19   17.73   0
   1  12   5  176.99   18.97   0
   2 -12   5   27.44    8.41   0
   2 -12   5   35.06   11.21   0
  -2  12  -5   38.87    9.35   0
   2  12   5   24.65    9.66   0
   3 -12   5   -9.88   11.68   0
   3 -12   5    0.14    8.66   0
   3  12   5    1.70    9.02   0
  -3  12  -5   -2.59    9.35   0
   4 -12   5   51.37   11.26   0
   4 -12   5    2.71   14.28   0
   4  12   5   19.05   10.36   0
   5 -12   5   20.00   19.10   0
   5 -12   5   24.92   12.05   0
   5  12   5    5.14   12.11   0
   6 -13  -5   57.33   19.42   0
   6 -13  -5   64.61   23.42   0
   6  13  -5   83.57   12.16   0
   5 -13  -5   37.06   14.48   0
   5 -13  -5   54.62   18.82   0
  -5  13   5   59.35   17.35   0
   5  13  -5   21.22    9.52   0
   4 -13  -5   13.71   14.85   0
   4 -13  -5   23.26   11.71   0
   4  13  -5   -0.73    7.96   0
  -4  13   5   13.72   14.96   0
   3 -13  -5   -1.75   10.14   0
   3 -13  -5    9.02   12.96   0
  -3  13   5   42.33   13.64   0
   3  13  -5   29.27    7.56   0
   2 -13  -5   14.98    9.23   0
  -2 -13   5   13.26    7.58   0
  -2 -13   5   30.23    6.67   0
   2 -13  -5   25.52   11.29   0
   2  13  -5   11.14    7.36   0
  -2  13   5   12.71   11.53   0
  -1 -13   5    5.84    8.52   0
  -1 -13   5   19.09    6.77   0
   1 -13  -5    6.09    7.07   0
   1 -13  -5   15.65    9.54   0
  -1  13   5  -14.83   10.18   0
   1  13  -5    0.25    7.25   0
   0 -13  -5   10.50    7.82   0
   0 -13   5   10.15    9.31   0
   0 -13   5   -0.74    7.04   0
   0 -13  -5   10.65    5.67   0
   0  13  -5    8.12    7.70   0
   0  13   5    6.50   10.20   0
  -1 -13  -5   21.54    4.74   0
   1 -13   5   30.31   10.83   0
   1 -13   5   18.02    8.10   0
  -1 -13  -5   19.19    6.36   0
  -1  13  -5   24.20    8.86   0
   1  13   5   34.38   10.70   0
   2 -13   5   10.19   12.33   0
   2 -13   5    7.77    9.03   0
  -2  13  -5   24.36    9.78   0
   2  13   5   -6.23    9.79   0
   3 -13   5   29.80   10.21   0
   3 -13   5    7.50   14.49   0
  -3  13  -5   38.32   11.91   0
   3  13   5   42.75   11.46   0
   4 -13   5  -13.33   11.78   0
   4 -13   5   14.69   16.29   0
   4  13   5    7.89   12.00   0
   5 -13   5    5.00   19.79   0
   5 -13   5  -12.59   12.63   0
   5  13   5   -2.80   13.92   0
   5 -14  -5   89.18   22.51   0
   5 -14  -5   85.52   17.65   0
  -5  14   5  111.78   21.60   0
   5  14  -5   65.44   11.98   0
   4 -14  -5   12.65   13.01   0
   4 -14  -5   18.05   17.09   0
   4  14  -5   -0.18    8.97   0
  -4  14   5   -4.57   16.31   0
   3 -14  -5   -5.39   10.92   0
   3 -14  -5   -7.60   14.52   0
  -3  14   5   13.11   14.15   0
   3  14  -5   -7.03    8.79   0
  -2 -14   5    4.95    6.98   0
   2 -14  -5    8.98    9.48   0
   2 -14  -5   18.21   12.07   0
  -2 -14   5   37.56    8.40   0
  -2  14   5   13.41   12.72   0
   2  14  -5   11.31    8.77   0
  -1 -14   5   24.07    8.13   0
  -1 -14   5   38.81   10.00   0
   1 -14  -5   20.31    8.25   0
   1 -14  -5   24.29   10.95   0
  -1  14   5   14.38   11.87   0
   1  14  -5   21.99    9.08   0
   0 -14   5    9.81    7.86   0
   0 -14  -5   -0.43    6.08   0
   0 -14   5    9.59   10.62   0
   0 -14  -5   13.77    9.21   0
   0  14  -5   13.27    9.77   0
   0  14   5   11.58   11.11   0
  -1 -14  -5    7.21    6.56   0
   1 -14   5   14.78    8.95   0
  -1 -14  -5    6.09    4.64   0
   1 -14   5    2.10   11.61   0
   1  14   5    0.73   10.83   0
  -1  14  -5  -19.28   10.25   0
   2 -14   5    0.46   13.56   0
   2 -14   5  -11.57    9.56   0
   2  14   5   16.90   11.71   0
  -2  14  -5   -8.42   11.04   0
   3 -14   5   29.80   15.92   0
   3 -14   5  -13.40   11.55   0
  -3  14  -5   22.71   13.57   0
   3  14   5   -1.60   12.43   0
   4 -14   5   20.11   13.80   0
   4 -14   5   23.64   18.14   0
   4 -15  -5    8.36   14.26   0
   4 -15  -5   -1.41   19.60   0
   4  15  -5  -21.56   11.24   0
  -4  15   5    1.25   18.80   0
   3 -15  -5   31.90   17.70   0
   3 -15  -5   49.61   13.08   0
   3  15  -5   29.06   11.16   0
  -3  15   5   18.51   17.12   0
   2 -15  -5   -4.35   13.65   0
  -2 -15   5   21.13    7.98   0
   2 -15  -5   -4.60   10.26   0
  -2 -15   5   -1.51    8.77   0
  -2  15   5    5.47   14.73   0
   2  15  -5    8.36    9.93   0
  -1 -15   5   -8.47    8.23   0
  -1 -15   5  -13.54   10.58   0
   1 -15  -5   24.87    8.65   0
   1 -15  -5   10.14   12.05   0
   1  15  -5   18.42   11.27   0
  -1  15   5   40.48   14.84   0
   0 -15  -5    3.71    6.66   0
   0 -15   5    0.82    8.84   0
   0 -15  -5    8.58    9.96   0
   0 -15   5    2.20   12.53   0
   0  15  -5   11.00   12.17   0
   0  15   5  -11.98   12.49   0
   1 -15   5    8.88   10.33   0
  -1 -15  -5   -4.23    5.30   0
  -1 -15  -5   -5.08    6.98   0
   1 -15   5   30.35   13.85   0
  -1  15  -5   -3.68   11.52   0
   1  15   5   -0.47   12.75   0
   2 -15   5   22.63   12.38   0
   2 -15   5   49.54   16.78   0
  -2  15  -5   23.04   13.15   0
   2  15   5   38.28   14.38   0
   3 -15   5   10.89   14.19   0
   3 -15   5   10.67   17.96   0
   3  15   5   50.96   15.04   0
  -3  15  -5   -1.00   15.44   0
   3 -16  -5   -5.12   14.41   0
   3 -16  -5   15.23   18.21   0
   3  16  -5   -3.16   12.90   0
   2 -16  -5   17.28   11.24   0
  -2 -16   5   19.52   10.00   0
  -2 -16   5    5.32    8.48   0
   2 -16  -5  -10.54   16.08   0
  -2  16   5  -37.50   16.61   0
   2  16  -5   -3.69   13.00   0
  -1 -16   5   -7.06    9.63   0
  -1 -16   5   12.39   11.89   0
   1 -16  -5  -11.94   13.43   0
   1 -16  -5    9.71    9.08   0
   1  16  -5   -2.39   13.65   0
  -1  16   5   -3.57   16.81   0
   0 -16  -5   75.41   13.12   0
   0 -16  -5   62.11    9.43   0
   0 -16   5   89.65   16.20   0
   0  16   5   54.98   17.62   0
   0  16  -5   49.93   15.21   0
   1 -16   5   19.26   11.75   0
   1 -16   5  -26.35   16.04   0
  -1 -16  -5    9.02    8.02   0
  -1 -16  -5    6.07    6.07   0
  -1  16  -5    8.69   15.06   0
   1  16   5   -2.40   14.86   0
   2 -16   5   39.12   14.80   0
   2 -16   5   45.85   18.64   0
   2  16   5   36.34   16.57   0
  -2  16  -5   41.90   16.10   0
   3 -16   5  -18.33   20.62   0
   3  16   5  -10.69   17.49   0
   2 -17  -5    7.35   18.53   0
  -2 -17   5   11.50   10.95   0
   2 -17  -5   -3.36   12.76   0
  -2 -17   5   14.15    9.77   0
  -2  17   5   24.98   20.39   0
   2  17  -5   10.40   16.51   0
   1 -17  -5  -16.68   15.75   0
   1 -17  -5   -1.70   10.59   0
  -1 -17   5   18.91   11.62   0
  -1 -17   5   20.44   14.49   0
   1  17  -5  -13.69   15.80   0
  -1  17   5  -23.39   18.40   0
   0 -17  -5   77.30   14.58   0
   0 -17   5   75.05   14.20   0
   0 -17   5   89.16   18.28   0
   0 -17  -5   77.11   10.94   0
   0  17   5   83.64   20.53   0
   0  17  -5   47.89   17.12   0
   1 -17   5   -9.02   14.39   0
  -1 -17  -5    9.98    7.04   0
  -1 -17  -5   15.66    8.52   0
   1 -17   5   38.53   18.95   0
   1  17   5   19.89   18.63   0
  -1  17  -5    5.27   17.33   0
   8   0  -6   42.96   15.86   0
   7   0  -6   50.17   12.12   0
   6   0  -6   13.54    8.23   0
   5   0  -6    7.75    6.48   0
  -5   0   6    8.58    4.52   0
  -4   0   6   73.68    8.11   0
   4   0  -6   64.99    8.80   0
  -3   0   6  959.06   59.15   0
   3   0  -6  945.23   59.15   0
  -2   0   6    5.97    3.85   0
   2   0  -6    3.78    3.83   0
   1   0  -6 1589.98   93.49   0
  -1   0   6 1468.74   93.47   0
   0   0  -6   95.46    7.67   0
   0   0   6   87.24    8.02   0
   1   0   6    4.46    3.56   0
  -1   0  -6    0.77    2.59   0
  -2   0  -6   36.14    4.32   0
   2   0   6   37.14    5.05   0
  -3   0  -6   32.50    3.75   0
   3   0   6   21.45    4.66   0
   4   0   6   -0.15    4.33   0
   5   0   6  123.05   11.52   0
   6   0   6    6.52    6.90   0
   7   0   6  116.93   15.70   0
   8  -1  -6   81.16   17.75   0
   8   1  -6   67.38   15.85   0
   7  -1  -6   14.84   11.05   0
   7   1  -6    3.84   10.40   0
   6  -1  -6    6.29    8.33   0
   6   1  -6    8.30    7.68   0
  -5  -1   6  181.69   13.25   0
   5  -1  -6  193.16   16.12   0
  -5   1   6  187.07   14.24   0
   5   1  -6  191.80   15.33   0
  -4  -1   6    0.91    3.83   0
   4  -1  -6    0.54    5.19   0
   4   1  -6   -2.10    4.65   0
  -4   1   6   -5.80    4.28   0
   3  -1  -6   -3.62    4.09   0
  -3  -1   6    0.82    3.74   0
  -3   1   6   -2.68    3.86   0
   3   1  -6   -0.35    3.82   0
   2  -1  -6   28.96    5.02   0
  -2  -1   6   26.23    4.72   0
  -2   1   6   21.22    5.10   0
   2   1  -6   28.00    4.72   0
   1  -1  -6 1243.08   74.83   0
  -1  -1   6 1197.84   74.80   0
   1   1  -6 1246.74   74.74   0
  -1   1   6 1188.23   74.92   0
   0  -1   6    3.63    3.42   0
   0  -1  -6    3.50    3.15   0
   0   1   6    1.62    3.38   0
   0   1  -6    3.61    2.85   0
   1  -1   6  211.16   14.51   0
  -1  -1  -6  195.02   13.89   0
  -1   1  -6  224.29   14.04   0
   1   1   6  206.19   14.46   0
   2  -1   6   -2.54    3.36   0
  -2  -1  -6    2.07    2.25   0
   2   1   6    4.45    3.61   0
  -2   1  -6    3.45    2.51   0
   3  -1   6  119.12    9.79   0
  -3  -1  -6  111.42    8.20   0
   3   1   6  126.80    9.74   0
  -3   1  -6  113.36    8.72   0
   4  -1   6   24.13    5.25   0
   4   1   6   22.33    5.19   0
  -4   1  -6   27.28    4.36   0
   5  -1   6   36.02    6.88   0
   5   1   6   51.66    7.06   0
   6  -1   6    7.78    7.06   0
   6   1   6   10.66    6.85   0
   7  -1   6  322.05   24.21   0
   7   1   6  301.82   24.08   0
   7  -2  -6   66.93   13.36   0
   7   2  -6   60.95   11.94   0
   6  -2  -6   16.45    9.85   0
  -6   2   6   28.67    6.24   0
   6   2  -6   33.90    8.16   0
  -5  -2   6    5.21    2.86   0
   5  -2  -6   -4.28    6.84   0
  -5   2   6    5.25    5.07   0
   5   2  -6   -3.33    5.67   0
  -4  -2   6   47.31    5.74   0
   4  -2  -6   36.74    7.29   0
  -4   2   6   48.94    6.80   0
   4   2  -6   52.67    6.70   0
   3  -2  -6  351.84   23.73   0
  -3  -2   6  360.28   23.09   0
  -3   2   6  337.98   23.52   0
   3   2  -6  350.15   23.03   0
  -2  -2   6    9.80    4.10   0
   2  -2  -6    4.33    4.33   0
  -2   2   6   11.67    4.68   0
   2   2  -6   15.55    3.88   0
   1  -2  -6   52.21    6.43   0
  -1  -2   6   52.32    6.17   0
  -1   2   6   49.51    6.73   0
   1   2  -6   50.36    6.00   0
   0  -2   6  208.75   14.89   0
   0  -2  -6  223.15   14.82   0
   0   2  -6  223.84   14.67   0
   0   2   6  208.97   15.14   0
  -1  -2  -6  911.83   53.16   0
   1  -2   6  797.03   53.37   0
  -1   2  -6  875.98   53.17   0
   1   2   6  873.19   53.51   0
  -2  -2  -6    5.42    2.32   0
   2  -2   6    8.09    3.76   0
  -2   2  -6    6.99    2.90   0
   2   2   6    3.80    3.71   0
   3  -2   6    6.25    4.03   0
  -3  -2  -6    9.19    2.19   0
   3   2   6   12.60    4.18   0
  -3   2  -6   13.75    3.37   0
   4  -2   6   57.57    8.10   0
  -4   2  -6   70.75    7.38   0
   4   2   6   56.41    7.71   0
   5  -2   6  220.04   17.50   0
   5   2   6  252.31   17.25   0
   6  -2   6   88.16   12.30   0
   6   2   6   83.64   11.16   0
   7  -2   6  168.71   17.24   0
   7   2   6  109.11   15.40   0
   8  -3  -6  -24.59   16.72   0
   8   3  -6    9.94   13.54   0
   7  -3  -6  -11.32   11.85   0
   7   3  -6    6.73    9.63   0
   6  -3  -6   49.14   11.18   0
  -6   3   6   59.46    8.40   0
   6   3  -6   62.66    9.07   0
   5  -3  -6  111.76   13.84   0
   5   3  -6  119.56   11.35   0
  -5   3   6  113.70   11.66   0
  -4  -3   6    3.82    3.48   0
   4  -3  -6   -8.01    5.77   0
   4   3  -6   -0.38    4.47   0
  -4   3   6   -0.56    5.09   0
  -3  -3   6   69.57    7.37   0
   3  -3  -6   75.93    9.30   0
  -3   3   6   68.19    8.60   0
   3   3  -6   82.87    7.85   0
  -2  -3   6  195.98   14.13   0
   2  -3  -6  203.11   15.01   0
   2   3  -6  204.16   14.20   0
  -2   3   6  204.17   15.24   0
   1  -3  -6  239.25   16.89   0
  -1  -3   6  244.54   16.68   0
  -1   3   6  238.46   17.17   0
   1   3  -6  250.94   16.40   0
   0  -3  -6    9.46    3.53   0
   0  -3   6    9.60    3.75   0
   0   3   6    5.64    3.97   0
   0   3  -6   10.08    3.21   0
  -1  -3  -6   18.69    3.46   0
   1  -3   6   21.98    4.20   0
   1   3   6   21.47    4.58   0
  -1   3  -6   21.10    3.65   0
  -2  -3  -6  230.89   14.55   0
   2  -3   6  235.37   15.76   0
  -2   3  -6  228.01   15.18   0
   2   3   6  209.63   15.58   0
   3  -3   6  102.52    8.98   0
  -3   3  -6  109.70    8.55   0
   3   3   6   77.24    8.62   0
   4  -3   6   38.02    6.56   0
  -4   3  -6   52.27    7.07   0
   4   3   6   41.57    6.11   0
   5  -3   6   47.62    7.91   0
   5   3   6   66.12    8.77   0
   6  -3   6  118.05   13.46   0
   6   3   6  130.58   13.05   0
   7  -3   6   31.02   10.71   0
   7   3   6   15.35    9.79   0
   8  -4  -6   28.78   18.67   0
   8   4  -6   36.93   12.93   0
   7  -4  -6   36.70   13.79   0
   7   4  -6   40.05   10.29   0
   6  -4  -6   -2.15    9.44   0
  -6   4   6   -2.43    6.52   0
   6   4  -6    3.64    6.89   0
   5  -4  -6   20.12    8.56   0
   5   4  -6   12.43    5.62   0
  -5   4   6    3.74    6.25   0
   4  -4  -6    2.52    6.36   0
  -4  -4   6    7.29    3.09   0
  -4   4   6    3.51    5.73   0
   4   4  -6    3.51    4.53   0
   3  -4  -6  136.94   12.82   0
  -3  -4   6  140.97   10.89   0
  -3   4   6  143.57   12.55   0
   3   4  -6  141.84   11.07   0
  -2  -4   6    6.50    3.71   0
   2  -4  -6   11.37    5.12   0
   2   4  -6    8.62    3.64   0
  -2   4   6    5.93    4.96   0
   1  -4  -6  178.88   13.14   0
  -1  -4   6  167.90   12.61   0
   1   4  -6  175.03   12.29   0
  -1   4   6  168.26   13.44   0
   0  -4  -6   21.94    4.54   0
   0  -4   6   35.03    4.94   0
   0   4   6   33.26    5.46   0
   0   4  -6   31.45    4.39   0
  -1  -4  -6  157.31   11.15   0
   1  -4   6  150.45   11.74   0
   1   4   6  167.17   12.15   0
  -1   4  -6  161.14   11.39   0
  -2  -4  -6    9.89    2.37   0
   2  -4   6    8.77    3.87   0
   2   4   6    2.51    4.06   0
  -2   4  -6   10.77    3.40   0
   3  -4   6   46.46    6.47   0
   3   4   6   47.79    6.20   0
  -3   4  -6   58.67    6.85   0
   4  -4   6   45.68    7.05   0
   4   4   6   45.89    6.61   0
  -4   4  -6   45.84    6.49   0
   5  -4   6    6.42    6.68   0
   5   4   6   11.06    5.88   0
   6  -4   6   40.68    9.34   0
   6   4   6   36.63    8.31   0
   7  -4   6   13.76   11.37   0
   7   4   6   30.60   10.54   0
   8  -5  -6   41.33   19.76   0
   7  -5  -6   34.88   14.41   0
   7   5  -6   11.87    8.95   0
   6  -5  -6   -1.47   10.30   0
  -6   5   6    2.53    7.70   0
   6   5  -6    7.97    6.86   0
   5  -5  -6    3.09    8.71   0
  -5   5   6    9.06    6.84   0
   5   5  -6    5.83    5.33   0
   4  -5  -6   14.56    7.34   0
  -4  -5   6    3.51    2.56   0
   4   5  -6    0.49    4.53   0
  -4   5   6   10.54    6.66   0
  -3  -5   6   25.41    4.68   0
   3  -5  -6   30.77    6.75   0
  -3   5   6   20.17    6.40   0
   3   5  -6   27.07    4.86   0
   2  -5  -6   62.20    8.20   0
  -2  -5   6   44.22    6.49   0
  -2   5   6   56.23    7.89   0
   2   5  -6   56.42    6.21   0
  -1  -5   6   21.11    4.47   0
   1  -5  -6   15.49    4.94   0
  -1   5   6   20.60    5.46   0
   1   5  -6   21.62    3.98   0
   0  -5   6    0.65    3.38   0
   0  -5  -6   -8.12    3.32   0
   0   5   6   -2.80    4.12   0
   0   5  -6    6.66    3.09   0
   1  -5   6   34.40    5.15   0
  -1  -5  -6   27.20    4.40   0
  -1   5  -6   38.24    4.68   0
   1   5   6   31.02    5.42   0
  -2  -5  -6    1.82    2.08   0
   2  -5   6   -1.95    3.81   0
   2   5   6    0.29    4.32   0
  -2   5  -6   -1.32    3.32   0
   3  -5   6   92.81    9.25   0
  -3   5  -6   77.07    8.54   0
   3   5   6   76.74    8.67   0
   4  -5   6   74.72    9.37   0
  -4   5  -6   59.77    7.73   0
   4   5   6   64.21    8.92   0
   5  -5   6   20.40    7.39   0
   5   5   6   25.93    6.91   0
   6  -5   6   16.38    9.15   0
   6   5   6   20.94    8.41   0
   7  -5   6   17.98   11.82   0
   7  -5   6    4.55   18.50   0
   7   5   6   10.01   11.09   0
   8  -6  -6   25.73   20.44   0
   8   6  -6   19.74   12.03   0
   7  -6  -6   24.41   15.74   0
   6  -6  -6   -0.37   11.51   0
  -6   6   6    9.25    8.63   0
   6   6  -6   22.54    7.17   0
   5  -6  -6    9.03    9.55   0
   5   6  -6   25.84    6.06   0
  -5   6   6   26.82    8.15   0
   4  -6  -6  191.69   17.90   0
   4   6  -6  213.95   15.30   0
  -4   6   6  205.52   17.45   0
  -3  -6   6   52.07    6.00   0
   3  -6  -6   47.97    8.40   0
  -3   6   6   45.42    8.29   0
   3   6  -6   50.14    6.07   0
   2  -6  -6    0.05    5.34   0
  -2  -6   6    5.28    3.94   0
  -2   6   6   -3.42    5.72   0
   2   6  -6   -1.08    3.27   0
  -1  -6   6   45.48    5.77   0
   1  -6  -6   40.83    6.48   0
   1   6  -6   38.94    5.65   0
  -1   6   6   56.05    7.53   0
   0  -6  -6   54.20    6.80   0
   0  -6   6   58.46    6.83   0
   0   6   6   61.06    7.75   0
   0   6  -6   61.68    6.32   0
  -1  -6  -6    0.31    3.26   0
   1  -6   6    3.94    4.14   0
   1   6   6    2.34    4.60   0
  -1   6  -6    3.56    3.39   0
   2  -6   6   46.42    6.29   0
  -2  -6  -6   43.36    4.39   0
  -2  -6  -6   37.88    4.21   0
   2   6   6   38.57    6.18   0
  -2   6  -6   44.11    5.77   0
   3  -6   6   61.79    8.70   0
   3   6   6   63.06    8.59   0
  -3   6  -6   68.42    8.39   0
   4  -6   6    5.68    6.03   0
  -4   6  -6    4.11    5.90   0
   4   6   6    5.78    5.95   0
   5  -6   6    9.24    7.59   0
   5   6   6    2.15    6.95   0
   6  -6   6   11.60    9.69   0
   6   6   6   12.06    8.85   0
   7  -6   6   -0.82   12.63   0
   7  -6   6  -19.04   19.09   0
   7   6   6   -2.13   11.05   0
   8  -7  -6    1.38   21.04   0
   8  -7  -6   -8.22   21.53   0
   8   7  -6   11.73   12.48   0
   7  -7  -6   26.05   16.45   0
   7   7  -6   38.11    9.76   0
   6  -7  -6   35.95   13.31   0
  -6   7   6   25.51   10.80   0
   6   7  -6   37.35    7.92   0
   5  -7  -6   27.69   10.74   0
   5   7  -6   28.23    6.41   0
  -5   7   6   33.30    9.72   0
   4  -7  -6   13.66    8.51   0
  -4   7   6   15.22    8.23   0
   4   7  -6   16.07    5.16   0
  -3  -7   6   -0.17    3.85   0
   3  -7  -6   -2.34    6.69   0
  -3  -7   6   -3.35    3.73   0
  -3   7   6    6.47    6.93   0
   3   7  -6    7.51    4.05   0
  -2  -7   6    5.51    4.32   0
   2  -7  -6   12.26    6.20   0
   2   7  -6   12.26    3.94   0
  -2   7   6   11.52    6.59   0
  -1  -7   6   -1.90    3.77   0
   1  -7  -6   -0.42    4.93   0
   1   7  -6   -1.26    3.36   0
  -1   7   6   -0.36    5.79   0
   0  -7   6    4.74    4.22   0
   0  -7  -6    6.18    4.57   0
   0   7  -6   -0.18    3.48   0
   0   7   6    6.02    5.53   0
  -1  -7  -6   -3.79    3.34   0
   1  -7   6    4.43    4.44   0
   1   7   6    2.18    5.15   0
  -1   7  -6   -7.69    3.67   0
  -2  -7  -6   76.62    6.79   0
  -2  -7  -6  104.96    6.77   0
   2  -7   6  106.45    9.90   0
  -2   7  -6   94.26    9.34   0
   2   7   6  105.48    9.78   0
   3  -7   6   13.06    5.90   0
   3   7   6   21.01    5.89   0
  -3   7  -6   20.93    6.17   0
   4  -7   6   60.09    8.52   0
   4   7   6   68.70    8.41   0
  -4   7  -6   53.45    8.64   0
   5  -7   6   43.08    9.15   0
   5   7   6   25.51    8.00   0
   6  -7   6  -13.55   15.52   0
   6  -7   6  -15.80    9.88   0
   6   7   6    0.64    9.19   0
   7  -7   6   10.15   20.74   0
   7  -7   6   30.67   14.13   0
   7   7   6   -9.33   12.14   0
   7  -8  -6   -6.24   17.04   0
   7   8  -6   -5.98    9.71   0
   6  -8  -6    3.73   12.95   0
  -6   8   6   -7.49   10.66   0
   6   8  -6   -5.56    7.38   0
   5  -8  -6   25.68   11.15   0
   5   8  -6    2.17    5.80   0
  -5   8   6   11.76    9.75   0
   4  -8  -6   89.85   13.26   0
   4   8  -6  111.34    9.99   0
  -4   8   6   70.12   11.90   0
  -3  -8   6   -6.15    3.90   0
   3  -8  -6   16.51    8.23   0
  -3  -8   6    4.20    4.06   0
  -3   8   6   -1.21    7.34   0
   3   8  -6   -2.32    4.11   0
   2  -8  -6   52.88    8.78   0
  -2  -8   6   46.24    6.22   0
  -2  -8   6   35.70    6.32   0
   2   8  -6   40.65    5.73   0
  -2   8   6   45.00    9.25   0
   1  -8  -6    3.42    5.70   0
  -1  -8   6    2.38    4.22   0
  -1   8   6    5.28    6.56   0
   1   8  -6   -0.79    3.78   0
   0  -8  -6   51.01    7.11   0
   0  -8   6   53.60    7.34   0
   0   8   6   47.69    8.11   0
   0   8  -6   60.84    6.67   0
   1  -8   6    5.15    4.86   0
  -1  -8  -6    4.51    3.84   0
  -1  -8  -6    5.26    3.68   0
  -1   8  -6    5.17    4.35   0
   1   8   6    0.66    5.95   0
  -2  -8  -6   42.48    3.71   0
  -2  -8  -6   28.58    4.11   0
   2  -8   6   56.17    7.42   0
  -2   8  -6   53.23    6.96   0
   2   8   6   59.84    7.74   0
   3  -8   6   33.53    7.10   0
  -3   8  -6   51.83    7.74   0
   3   8   6   39.11    7.54   0
   4  -8   6  297.04   20.83   0
  -4   8  -6  220.02   20.30   0
   4   8   6  286.80   19.83   0
   5  -8   6   40.50    9.94   0
   5  -8   6   45.47   15.35   0
   5   8   6   29.85    8.47   0
   6  -8   6   25.65   18.22   0
   6  -8   6   59.12   12.03   0
   6   8   6   53.86   11.15   0
   7  -9  -6   -5.51   18.51   0
   7  -9  -6   -8.95   16.09   0
   7   9  -6   10.03    9.74   0
   6  -9  -6   20.25   15.34   0
   6  -9  -6   51.37   15.10   0
   6   9  -6   38.67    8.52   0
  -6   9   6   37.60   13.20   0
   5  -9  -6   12.63   12.03   0
  -5   9   6   -9.23   10.11   0
   5   9  -6   10.48    6.26   0
   4  -9  -6   35.23   11.19   0
   4   9  -6   33.26    6.15   0
  -4   9   6   34.07   10.49   0
   3  -9  -6    0.99    8.76   0
  -3  -9   6    9.43    4.45   0
  -3  -9   6    4.65    4.38   0
   3   9  -6    3.58    4.77   0
  -3   9   6    0.17    7.91   0
  -2  -9   6   -3.92    5.29   0
  -2  -9   6    5.77    4.78   0
   2  -9  -6    6.49    7.38   0
   2   9  -6    2.08    4.30   0
  -2   9   6   -3.35    7.10   0
   1  -9  -6   17.83    6.57   0
  -1  -9   6   16.23    6.58   0
   1  -9  -6   16.28    6.73   0
  -1  -9   6   17.76    5.46   0
  -1   9   6   14.06    7.75   0
   1   9  -6   18.98    4.94   0
   0  -9   6    8.08    6.60   0
   0  -9   6   -0.21    4.83   0
   0  -9  -6    3.23    4.87   0
   0  -9  -6   -1.74    5.15   0
   0   9  -6   -1.13    4.16   0
   0   9   6   -1.11    6.62   0
  -1  -9  -6   28.10    5.12   0
  -1  -9  -6   29.60    4.73   0
   1  -9   6   33.66    6.49   0
   1   9   6   26.77    7.47   0
  -1   9  -6   35.97    6.24   0
  -2  -9  -6    1.76    1.61   0
   2  -9   6   -4.70    5.93   0
  -2  -9  -6   -1.42    1.94   0
   2   9   6    4.48    6.83   0
  -2   9  -6    1.58    5.60   0
   3  -9   6  342.39   23.74   0
   3  -9   6  322.40   26.05   0
   3   9   6  348.79   23.69   0
  -3   9  -6  305.92   23.86   0
   4  -9   6   38.49    9.06   0
   4  -9   6    5.10   11.51   0
   4   9   6   28.50    8.23   0
  -4   9  -6   25.50    9.13   0
   5  -9   6  114.97   17.91   0
   5  -9   6  118.29   16.20   0
   5   9   6  117.78   14.84   0
   6  -9   6   -1.08   18.76   0
   6  -9   6   45.91   13.12   0
   6   9   6   45.47   11.76   0
   7 -10  -6    3.78   20.89   0
   7 -10  -6    7.76   16.95   0
   7  10  -6    3.27   10.42   0
   6 -10  -6   22.06   16.68   0
   6 -10  -6   -5.44   14.27   0
  -6  10   6   22.89   14.56   0
   6  10  -6   -2.19    7.90   0
   5 -10  -6   13.30   13.91   0
   5 -10  -6    8.19   11.96   0
   5  10  -6   14.31    6.97   0
  -5  10   6   18.62   12.42   0
   4 -10  -6   20.52   10.74   0
   4 -10  -6   17.97   11.37   0
   4  10  -6   22.26    6.35   0
  -4  10   6   13.44   10.48   0
  -3 -10   6    0.57    4.59   0
   3 -10  -6   -6.51    9.00   0
   3 -10  -6   16.47   10.25   0
  -3 -10   6   -0.22    4.68   0
  -3  10   6    8.26    9.39   0
   3  10  -6   -1.96    5.07   0
   2 -10  -6   -5.57    7.79   0
   2 -10  -6   -3.45    7.45   0
  -2 -10   6   -0.31    5.72   0
  -2 -10   6    2.61    5.01   0
   2  10  -6   -2.27    4.79   0
  -2  10   6    5.15    7.85   0
  -1 -10   6   -2.25    6.52   0
   1 -10  -6   12.59    6.52   0
   1 -10  -6    5.63    7.61   0
  -1 -10   6   10.28    5.48   0
   1  10  -6    4.29    4.97   0
  -1  10   6    8.23    8.34   0
   0 -10   6   -0.50    5.16   0
   0 -10   6    5.28    7.08   0
   0 -10  -6   -1.79    4.82   0
   0 -10  -6    1.20    5.99   0
   0  10  -6   -1.75    5.09   0
   0  10   6    9.87    8.03   0
  -1 -10  -6  129.79   10.36   0
  -1 -10  -6  110.25    9.67   0
   1 -10   6  137.06   11.81   0
   1 -10   6  136.01   14.81   0
   1  10   6  101.45   13.78   0
  -1  10  -6   96.19   11.49   0
   2 -10   6   34.15    7.86   0
   2 -10   6   31.35    9.98   0
   2  10   6   36.33    8.42   0
  -2  10  -6   26.95    7.18   0
   3 -10   6    0.14    7.47   0
   3 -10   6   13.97   10.87   0
   3  10   6    9.60    7.64   0
  -3  10  -6    2.56    7.78   0
   4 -10   6   76.64   15.55   0
   4 -10   6  109.41   14.37   0
   4  10   6  104.67   14.23   0
  -4  10  -6   84.37   12.68   0
   5 -10   6   95.05   18.87   0
   5 -10   6  144.36   17.58   0
   5  10   6  130.95   14.57   0
   6 -10   6   37.74   20.67   0
   6 -10   6   52.24   13.67   0
   6  10   6    0.41   12.63   0
   6 -11  -6    2.55   17.30   0
   6 -11  -6   16.71   14.55   0
   6  11  -6   13.05    9.23   0
  -6  11   6    0.09   15.69   0
   5 -11  -6   92.70   17.47   0
   5 -11  -6  106.57   15.79   0
  -5  11   6  102.63   17.30   0
   5  11  -6   78.38   10.29   0
   4 -11  -6    4.65    9.81   0
   4 -11  -6    6.24   12.81   0
  -4  11   6   12.17   11.38   0
   4  11  -6    5.67    6.39   0
   3 -11  -6   43.18   10.62   0
  -3 -11   6   43.36    6.20   0
  -3 -11   6   41.44    6.28   0
   3 -11  -6   39.41   11.66   0
   3  11  -6   38.29    7.15   0
  -3  11   6   45.10   11.55   0
  -2 -11   6   38.36    7.68   0
   2 -11  -6   22.45    9.60   0
   2 -11  -6   37.21    8.62   0
  -2 -11   6   50.88    7.16   0
  -2  11   6   25.02   10.34   0
   2  11  -6   37.09    6.67   0
   1 -11  -6   23.22    7.10   0
  -1 -11   6   34.03    8.33   0
  -1 -11   6   35.40    6.82   0
   1 -11  -6   18.56    8.70   0
  -1  11   6   15.70    9.13   0
   1  11  -6   25.14    6.41   0
   0 -11   6  -10.36    7.84   0
   0 -11  -6   -8.87    5.07   0
   0 -11  -6   -4.83    6.37   0
   0 -11   6   -1.87    5.56   0
   0  11   6    1.71    8.40   0
   0  11  -6   -0.43    5.56   0
   1 -11   6    9.75    6.65   0
   1 -11   6    3.10    8.76   0
  -1 -11  -6    5.93    5.20   0
  -1 -11  -6    8.93    4.12   0
  -1  11  -6    7.98    6.45   0
   1  11   6   16.00    8.40   0
   2 -11   6    8.18    7.62   0
   2 -11   6   -9.46    9.94   0
   2  11   6    1.62    8.23   0
  -2  11  -6   -4.81    7.13   0
   3 -11   6   16.59    8.54   0
   3 -11   6   -0.58   12.36   0
   3  11   6    8.18    8.92   0
  -3  11  -6   19.08    8.99   0
   4 -11   6   -5.52   13.77   0
   4 -11   6   12.94   10.03   0
   4  11   6   -9.97    9.72   0
  -4  11  -6   20.47   11.51   0
   5 -11   6   57.75   13.20   0
   5 -11   6   22.65   18.28   0
   5  11   6   46.75   12.61   0
   6 -12  -6   10.10   15.66   0
   6 -12  -6   13.14   19.96   0
  -6  12   6   14.83   18.19   0
   6  12  -6   12.13   10.11   0
   5 -12  -6    7.49   13.03   0
   5 -12  -6   35.24   16.85   0
   5  12  -6   10.07    8.32   0
  -5  12   6   -3.63   15.26   0
   4 -12  -6   -7.75   13.48   0
   4 -12  -6   16.80   11.48   0
   4  12  -6    4.46    6.93   0
  -4  12   6  -18.60   12.46   0
  -3 -12   6  201.16   14.87   0
   3 -12  -6  186.81   19.77   0
   3 -12  -6  213.94   23.15   0
  -3 -12   6  206.41   14.71   0
  -3  12   6  196.80   21.75   0
   3  12  -6  188.50   16.22   0
  -2 -12   6   17.64    7.71   0
   2 -12  -6   15.97   10.88   0
  -2 -12   6   16.61    6.36   0
   2 -12  -6   -8.77    8.28   0
  -2  12   6   17.46   10.66   0
   2  12  -6    6.65    6.68   0
  -1 -12   6   -7.88    7.71   0
   1 -12  -6   -2.98    8.50   0
  -1 -12   6    2.27    6.33   0
   1 -12  -6   -2.89    6.80   0
   1  12  -6   18.26    6.88   0
  -1  12   6   -3.14    9.29   0
   0 -12  -6   71.26    8.13   0
   0 -12   6   63.38    9.25   0
   0 -12  -6   80.95    9.83   0
   0 -12   6   72.49   11.44   0
   0  12   6   51.55   11.56   0
   0  12  -6   53.30    9.03   0
  -1 -12  -6   46.03    5.73   0
   1 -12   6   38.54   11.40   0
  -1 -12  -6   37.47    6.87   0
   1 -12   6   61.11    9.14   0
  -1  12  -6   53.43    8.99   0
   1  12   6   65.58   11.90   0
   2 -12   6   17.22    8.80   0
   2 -12   6   10.53   11.95   0
  -2  12  -6   18.65    9.12   0
   2  12   6   15.14    9.90   0
   3 -12   6    5.28   12.88   0
   3 -12   6   23.37    9.82   0
   3  12   6    7.11    9.81   0
  -3  12  -6    9.16   10.44   0
   4 -12   6   33.81   16.48   0
   4 -12   6   51.78   13.17   0
  -4  12  -6   63.25   14.26   0
   4  12   6   64.33   12.76   0
   5 -12   6   35.55   13.68   0
   5 -12   6   56.35   19.89   0
   5  12   6   41.01   14.40   0
   5 -13  -6  -17.03   15.18   0
   5 -13  -6   -5.61   18.57   0
   5  13  -6   10.39    9.68   0
  -5  13   6  -22.96   17.59   0
   4 -13  -6  -10.05   15.21   0
   4 -13  -6  -11.60   12.59   0
   4  13  -6    0.59    8.48   0
  -4  13   6   -2.90   14.55   0
  -3 -13   6    0.06    4.81   0
   3 -13  -6  -26.27   10.31   0
  -3 -13   6    6.76    5.33   0
   3 -13  -6   -6.13   13.10   0
  -3  13   6   14.17   12.93   0
   3  13  -6   -2.31    7.65   0
   2 -13  -6   37.46   12.00   0
  -2 -13   6   24.64    8.57   0
  -2 -13   6   42.45    7.90   0
   2 -13  -6   26.86   10.16   0
  -2  13   6   47.70   13.42   0
   2  13  -6   40.25    8.62   0
  -1 -13   6  141.76   15.88   0
  -1 -13   6  119.90   13.34   0
   1 -13  -6  131.42   14.51   0
   1 -13  -6  119.75   16.09   0
  -1  13   6  141.48   19.02   0
   1  13  -6  113.64   14.55   0
   0 -13  -6   28.11    8.77   0
   0 -13  -6   15.59    6.46   0
   0 -13   6   27.00   10.99   0
   0 -13   6   11.30    7.85   0
   0  13   6   17.04   10.61   0
   0  13  -6   17.44    8.00   0
   1 -13   6  -27.60   11.03   0
   1 -13   6   15.80    8.45   0
  -1 -13  -6    3.58    4.42   0
  -1 -13  -6   -1.86    5.99   0
  -1  13  -6   17.43    9.39   0
   1  13   6   -0.22   10.08   0
   2 -13   6  154.73   17.09   0
   2 -13   6  145.25   18.27   0
  -2  13  -6  129.72   17.96   0
   2  13   6  127.98   18.55   0
   3 -13   6   92.63   17.77   0
  -3  13  -6   49.20   14.19   0
   3  13   6   90.31   13.76   0
   4 -13   6   23.10   13.73   0
   4 -13   6    2.10   18.06   0
   4  13   6    3.52   13.62   0
   5 -14  -6    9.27   20.87   0
   5 -14  -6   24.92   16.59   0
  -5  14   6   10.27   20.69   0
   5  14  -6   15.42   11.99   0
   4 -14  -6   29.66   18.55   0
   4 -14  -6   24.56   14.52   0
   4  14  -6   48.89   10.99   0
  -4  14   6   64.03   18.53   0
   3 -14  -6   -8.31   11.76   0
   3 -14  -6   21.18   15.15   0
   3  14  -6   10.43    9.11   0
  -3  14   6   12.72   14.00   0
  -2 -14   6   16.58    9.26   0
  -2 -14   6   19.85    7.69   0
   2 -14  -6   36.12   12.79   0
   2 -14  -6   22.44   10.52   0
  -2  14   6   15.79   14.02   0
   2  14  -6    6.17    9.19   0
   1 -14  -6   62.65    9.78   0
  -1 -14   6   58.28   11.81   0
  -1 -14   6   55.59    9.84   0
   1 -14  -6   38.42   11.60   0
   1  14  -6   47.38   10.88   0
  -1  14   6   59.52   14.54   0
   0 -14  -6   81.82   11.74   0
   0 -14   6  107.06   14.75   0
   0 -14   6  111.22   14.70   0
   0 -14  -6  119.36   15.00   0
   0  14  -6  103.53   13.22   0
   0  14   6  128.33   16.70   0
  -1 -14  -6   28.79    5.87   0
   1 -14   6   46.28   10.73   0
   1 -14   6   61.08   13.83   0
  -1 -14  -6   45.52    7.66   0
   1  14   6   48.25   12.87   0
  -1  14  -6   38.07   11.45   0
   2 -14   6   -6.34   10.59   0
   2 -14   6   17.92   14.83   0
   2  14   6    1.37   11.90   0
  -2  14  -6   13.78   12.56   0
   3 -14   6    7.46   13.30   0
   3 -14   6  -22.00   16.91   0
  -3  14  -6    2.58   13.82   0
   3  14   6   18.62   13.42   0
   4 -14   6   19.02   15.40   0
   4 -14   6   49.74   20.74   0
   4  14   6   65.66   16.86   0
   4 -15  -6    7.76   16.47   0
   4 -15  -6   -1.53   19.55   0
   4  15  -6   -1.63   11.94   0
  -4  15   6   14.58   19.40   0
   3 -15  -6   24.58   17.21   0
   3 -15  -6   12.01   13.73   0
  -3  15   6   -4.28   17.57   0
   3  15  -6    1.19   11.00   0
   2 -15  -6   39.66   11.93   0
  -2 -15   6   65.40   11.51   0
   2 -15  -6   51.12   14.95   0
  -2 -15   6   65.78   10.13   0
   2  15  -6   38.98   11.86   0
  -2  15   6   35.75   16.39   0
  -1 -15   6   34.65   10.28   0
  -1 -15   6   48.00   12.31   0
   1 -15  -6   41.30    9.80   0
   1 -15  -6   14.47   12.58   0
   1  15  -6   53.92   11.53   0
  -1  15   6   20.97   14.84   0
   0 -15   6   39.02   10.72   0
   0 -15  -6    7.57   10.35   0
   0 -15  -6   26.37    7.63   0
   0 -15   6   46.80   14.67   0
   0  15  -6   29.53   12.01   0
   0  15   6   57.75   15.12   0
   1 -15   6   45.01   15.91   0
  -1 -15  -6   54.62    8.71   0
  -1 -15  -6   55.93    7.25   0
   1 -15   6   67.58   12.76   0
   1  15   6   55.92   14.92   0
  -1  15  -6   72.05   14.73   0
   2 -15   6   66.23   14.50   0
   2 -15   6   69.78   19.02   0
   2  15   6   53.63   15.91   0
  -2  15  -6   80.44   16.37   0
   3 -15   6   34.22   16.58   0
   3 -15   6   44.84   19.69   0
  -3  15  -6    2.20   15.17   0
   3  15   6   25.83   16.19   0
   3 -16  -6    4.07   19.85   0
   3 -16  -6   18.01   15.34   0
  -3  16   6    8.21   20.23   0
   3  16  -6   12.02   13.95   0
   2 -16  -6   29.57   12.71   0
  -2 -16   6   41.33   10.27   0
  -2 -16   6   26.27   11.76   0
   2 -16  -6   -2.81   17.11   0
   2  16  -6   35.77   13.92   0
  -2  16   6   20.36   18.39   0
  -1 -16   6   35.88   11.40   0
  -1 -16   6   34.55   14.02   0
   1 -16  -6    8.37    9.69   0
   1 -16  -6    7.69   14.53   0
  -1  16   6   35.38   18.04   0
   1  16  -6    1.34   13.47   0
   0 -16   6   82.88   18.35   0
   0 -16   6   82.58   14.29   0
   0 -16  -6  130.80   13.75   0
   0 -16  -6  102.97   14.37   0
   0  16   6   64.10   18.51   0
   0  16  -6  134.42   17.67   0
  -1 -16  -6   17.16    8.09   0
  -1 -16  -6   18.59    6.21   0
   1 -16   6   -2.82   17.34   0
   1 -16   6   25.57   13.03   0
  -1  16  -6   -2.86   14.44   0
   1  16   6    1.36   16.56   0
   2 -16   6   35.93   19.61   0
   2 -16   6   24.72   16.40   0
   2  16   6   28.20   17.49   0
  -2  16  -6   26.89   16.79   0
   1 -17  -6   20.92   16.09   0
  -1 -17   6   -8.76   15.71   0
  -1  17   6   10.58   19.70   0
   0 -17  -6   17.21   13.21   0
   0 -17   6   63.79   18.59   0
   0  17   6  -18.72   20.81   0
   8   0  -7   14.43   16.05   0
   7   0  -7    1.43   11.16   0
   6   0  -7   -3.14    8.26   0
  -6   0   7    5.75    4.94   0
  -5   0   7    7.49    4.82   0
   5   0  -7   -6.23    6.74   0
  -4   0   7    5.13    4.82   0
   4   0  -7    0.13    5.46   0
  -3   0   7   -0.83    4.34   0
   3   0  -7    4.62    4.77   0
   2   0  -7    0.40    4.16   0
  -2   0   7   -8.05    3.72   0
  -1   0   7    0.16    3.83   0
   1   0  -7    1.94    3.61   0
   0   0   7    7.38    4.13   0
   0   0  -7    4.63    3.21   0
  -1   0  -7    3.54    2.92   0
   1   0   7   -2.47    3.75   0
  -2   0  -7    1.04    2.72   0
   2   0   7   -2.10    4.21   0
  -3   0  -7   -0.50    2.96   0
   3   0   7   -1.86    4.64   0
   4   0   7   -6.40    5.20   0
  -4   0  -7   -0.97    3.44   0
   5   0   7  -10.16    6.52   0
   6   0   7   -2.43    8.45   0
   7   0   7   17.58   11.30   0
   8  -1  -7    3.21   16.32   0
   8   1  -7   -3.25   15.26   0
   7  -1  -7    7.56   11.41   0
   7   1  -7   -4.74   10.56   0
   6  -1  -7   -0.90    8.66   0
   6   1  -7   -5.00    7.98   0
  -6   1   7    7.42    5.77   0
   5  -1  -7   -4.59    6.93   0
  -5  -1   7    6.30    4.69   0
  -5   1   7    7.52    5.31   0
   5   1  -7    3.21    6.41   0
   4  -1  -7   -0.70    5.82   0
  -4  -1   7    3.47    4.68   0
  -4   1   7    7.33    5.29   0
   4   1  -7   -1.27    5.33   0
   3  -1  -7  523.86   32.94   0
  -3  -1   7  540.09   32.75   0
  -3   1   7  454.15   32.58   0
   3   1  -7  495.81   32.56   0
  -2  -1   7   82.76    8.48   0
   2  -1  -7   81.18    8.66   0
  -2   1   7   79.60    8.83   0
   2   1  -7   77.88    8.03   0
  -1  -1   7  726.88   44.76   0
   1  -1  -7  744.88   44.74   0
   1   1  -7  690.10   44.52   0
  -1   1   7  685.04   44.75   0
   0  -1   7    1.94    3.90   0
   0  -1  -7    0.14    3.44   0
   0   1   7   -1.06    3.78   0
   0   1  -7   -1.82    3.03   0
  -1  -1  -7   14.00    3.48   0
   1  -1   7   15.44    4.43   0
   1   1   7   11.14    4.46   0
  -1   1  -7   12.18    3.39   0
  -2  -1  -7   10.95    3.18   0
   2  -1   7   11.87    4.42   0
  -2   1  -7   11.42    3.20   0
   2   1   7   10.66    4.60   0
  -3  -1  -7    2.68    2.89   0
   3  -1   7   -1.39    4.74   0
  -3   1  -7    7.19    3.42   0
   3   1   7    5.73    4.85   0
   4  -1   7   12.27    5.86   0
  -4   1  -7   17.04    4.33   0
   4   1   7   22.52    5.92   0
   5  -1   7   26.33    7.21   0
   5   1   7   33.10    7.52   0
   6  -1   7    3.13    8.57   0
   6   1   7   21.69    8.51   0
   7  -1   7   32.64   12.14   0
   7   1   7   48.31   12.02   0
   8  -2  -7   -3.81   17.09   0
   8   2  -7   28.04   14.99   0
   7  -2  -7    8.82   12.50   0
   7   2  -7   20.91   10.99   0
   6  -2  -7   30.85   10.35   0
   6   2  -7   20.66    8.39   0
  -6   2   7   32.62    7.21   0
  -5  -2   7    5.04    4.23   0
   5  -2  -7    0.83    7.29   0
   5   2  -7   13.46    6.60   0
  -5   2   7    4.88    5.92   0
  -4  -2   7    7.22    4.40   0
   4  -2  -7   -2.91    5.87   0
   4   2  -7    3.54    5.46   0
  -4   2   7   10.52    5.84   0
  -3  -2   7   63.72    7.97   0
   3  -2  -7   63.63    8.15   0
  -3   2   7   66.60    8.53   0
   3   2  -7   64.19    7.64   0
   2  -2  -7   33.13    5.91   0
  -2  -2   7   31.05    5.42   0
  -2   2   7   28.52    6.12   0
   2   2  -7   34.56    5.41   0
   1  -2  -7   38.05    5.75   0
  -1  -2   7   38.01    5.72   0
  -1   2   7   41.32    6.15   0
   1   2  -7   42.55    5.29   0
   0  -2  -7   20.07    4.36   0
   0  -2   7   20.17    4.82   0
   0   2  -7   29.96    4.45   0
   0   2   7   24.42    5.10   0
  -1  -2  -7   25.61    4.15   0
   1  -2   7   25.53    4.82   0
   1   2   7   28.27    5.38   0
  -1   2  -7   28.76    4.18   0
  -2  -2  -7   40.62    4.93   0
   2  -2   7   56.95    7.05   0
  -2   2  -7   37.28    5.21   0
   2   2   7   39.52    6.04   0
   3  -2   7   -2.98    4.89   0
  -3  -2  -7    5.93    2.67   0
   3   2   7    3.69    5.10   0
  -3   2  -7    5.85    3.85   0
   4  -2   7   10.56    5.69   0
   4   2   7   17.83    6.14   0
  -4   2  -7   11.11    4.57   0
   5  -2   7  190.14   16.73   0
   5   2   7  213.44   16.60   0
   6  -2   7   -2.50    9.06   0
   6   2   7    9.04    8.50   0
   7  -2   7  123.12   16.05   0
   7   2   7  123.10   15.71   0
   8  -3  -7   14.11   18.80   0
   8   3  -7   43.08   14.54   0
   7  -3  -7    1.77   13.18   0
   7   3  -7   19.07   10.48   0
   6  -3  -7    8.34   10.26   0
  -6   3   7   21.81    7.20   0
   6   3  -7   14.23    7.65   0
  -5  -3   7   13.74    3.71   0
   5  -3  -7   25.65    8.79   0
  -5   3   7   22.49    7.00   0
   5   3  -7   21.53    6.67   0
  -4  -3   7   86.05    8.40   0
   4  -3  -7   79.80   11.26   0
  -4   3   7   75.91   10.42   0
   4   3  -7   67.40    9.15   0
   3  -3  -7   13.94    5.83   0
  -3  -3   7   12.25    4.67   0
  -3   3   7   16.11    6.11   0
   3   3  -7   28.73    5.22   0
  -2  -3   7   62.89    7.32   0
   2  -3  -7   59.63    8.19   0
   2   3  -7   60.09    7.27   0
  -2   3   7   71.60    8.36   0
  -1  -3   7  135.14   10.41   0
   1  -3  -7  123.24   10.77   0
   1   3  -7  119.38    9.88   0
  -1   3   7  125.98   11.02   0
   0  -3   7   71.69    7.58   0
   0  -3  -7   78.78    7.41   0
   0   3   7   64.45    7.98   0
   0   3  -7   77.51    7.14   0
  -1  -3  -7    2.54    3.09   0
   1  -3   7   -3.39    3.86   0
  -1   3  -7    3.27    3.14   0
   1   3   7   -0.60    4.33   0
  -2  -3  -7   35.83    4.67   0
   2  -3   7   38.44    6.05   0
  -2   3  -7   35.78    4.93   0
   2   3   7   39.26    6.15   0
  -3  -3  -7   65.47    5.34   0
   3  -3   7   81.74    8.96   0
  -3   3  -7   66.63    7.45   0
   3   3   7   58.91    7.44   0
   4  -3   7    8.73    5.80   0
   4   3   7    6.00    6.09   0
  -4   3  -7   -1.67    4.74   0
   5  -3   7  346.51   25.92   0
   5   3   7  401.09   25.99   0
   6  -3   7   27.47   10.06   0
   6   3   7   41.25    9.56   0
   7  -3   7   59.06   13.64   0
   7   3   7   77.31   13.54   0
   8  -4  -7   15.12   19.47   0
   8   4  -7   21.84   13.49   0
   7  -4  -7   29.39   14.26   0
   7   4  -7    9.94   10.19   0
   6  -4  -7   51.18   12.08   0
   6   4  -7   42.23    9.14   0
  -6   4   7   48.24    9.05   0
   5  -4  -7   91.62   12.06   0
  -5   4   7   88.83   12.03   0
   5   4  -7   98.22   11.13   0
  -4  -4   7   80.83    8.34   0
   4  -4  -7   91.71   12.12   0
   4   4  -7   77.70    9.40   0
  -4   4   7   79.69   10.12   0
  -3  -4   7   17.60    5.02   0
   3  -4  -7   17.27    6.54   0
   3   4  -7   17.37    4.95   0
  -3   4   7   15.74    6.34   0
  -2  -4   7  133.29   11.11   0
   2  -4  -7  137.97   12.08   0
   2   4  -7  127.55   10.70   0
  -2   4   7  142.33   12.39   0
   1  -4  -7   96.17    9.15   0
  -1  -4   7   75.83    8.52   0
  -1   4   7   88.17    9.65   0
   1   4  -7   89.78    8.09   0
   0  -4   7  223.80   16.04   0
   0  -4  -7  231.64   15.83   0
   0   4   7  218.72   16.39   0
   0   4  -7  223.92   15.46   0
  -1  -4  -7   48.06    6.23   0
   1  -4   7   63.94    7.36   0
  -1   4  -7   71.43    6.56   0
   1   4   7   60.21    7.80   0
  -2  -4  -7   32.27    4.09   0
   2  -4   7   36.91    6.15   0
   2   4   7   35.25    6.11   0
  -2   4  -7   46.49    5.47   0
   3  -4   7   61.96    7.79   0
   3   4   7   61.04    7.78   0
  -3   4  -7   61.66    7.82   0
   4  -4   7  124.79   12.35   0
  -4   4  -7  136.06   11.69   0
   4   4   7  119.27   12.43   0
   5  -4   7  110.89   13.60   0
   5   4   7  108.06   12.68   0
   6  -4   7   -7.00    9.88   0
   6   4   7    1.34    9.18   0
   7  -4   7   23.12   13.08   0
   7   4   7   -0.09   12.43   0
   8  -5  -7    6.61   20.41   0
   8   5  -7   28.75   13.45   0
   7  -5  -7   87.07   17.41   0
   7   5  -7   68.09   11.73   0
   6  -5  -7    6.58   11.74   0
  -6   5   7    8.51    8.42   0
   6   5  -7    6.66    7.61   0
   5  -5  -7   12.42    9.44   0
   5   5  -7    9.61    6.27   0
  -5   5   7   10.08    7.50   0
   4  -5  -7  141.91   15.11   0
  -4  -5   7  153.31   11.62   0
  -4   5   7  152.16   15.20   0
   4   5  -7  149.65   12.78   0
  -3  -5   7  166.94   13.02   0
   3  -5  -7  161.53   14.89   0
  -3   5   7  197.24   15.77   0
   3   5  -7  166.54   13.16   0
  -2  -5   7   53.65    6.86   0
   2  -5  -7   60.10    8.14   0
   2   5  -7   49.15    6.20   0
  -2   5   7   61.93    8.62   0
  -1  -5   7   25.32    4.92   0
   1  -5  -7   25.04    5.68   0
   1   5  -7   20.05    4.32   0
  -1   5   7   21.18    6.01   0
   0  -5  -7  125.79   10.72   0
   0  -5   7  133.22   11.10   0
   0   5  -7  140.46   10.52   0
   0   5   7  143.61   12.07   0
  -1  -5  -7   -2.04    3.33   0
   1  -5   7   -1.33    4.04   0
   1   5   7    1.07    4.68   0
  -1   5  -7   -5.27    3.22   0
   2  -5   7  104.64   10.18   0
  -2  -5  -7   90.55    7.67   0
   2   5   7  108.08   10.15   0
  -2   5  -7  106.78    9.28   0
   3  -5   7    1.69    5.31   0
  -3   5  -7    8.37    4.76   0
   3   5   7    3.58    5.53   0
   4  -5   7    7.08    6.97   0
  -4   5  -7   10.80    6.21   0
   4   5   7   -1.85    6.49   0
   5  -5   7    9.27    8.30   0
   5   5   7   18.00    8.02   0
   6  -5   7   64.30   12.21   0
   6   5   7   70.88   11.74   0
   7  -5   7   11.77   13.99   0
   7   5   7  -10.76   12.98   0
   8  -6  -7    3.65   21.50   0
   8   6  -7   -9.77   12.87   0
   7  -6  -7    0.40   16.42   0
   7   6  -7   11.94   10.09   0
   6  -6  -7   47.97   14.00   0
   6   6  -7   56.99    9.43   0
  -6   6   7   54.25   11.29   0
   5  -6  -7  178.82   18.58   0
  -5   6   7  153.63   16.90   0
   5   6  -7  173.38   14.48   0
   4  -6  -7  126.13   14.58   0
  -4  -6   7  112.97    9.40   0
  -4   6   7   97.44   13.57   0
   4   6  -7  118.33   11.09   0
  -3  -6   7   67.91    8.11   0
   3  -6  -7   56.92    9.07   0
  -3   6   7   55.95    9.81   0
   3   6  -7   58.82    7.18   0
  -2  -6   7  124.13   10.73   0
   2  -6  -7  129.34   12.20   0
   2   6  -7  118.72   10.35   0
  -2   6   7  119.35   12.76   0
   1  -6  -7  138.18   12.16   0
  -1  -6   7  144.06   11.51   0
  -1   6   7  134.16   13.11   0
   1   6  -7  140.44   10.94   0
   0  -6   7  230.75   17.46   0
   0  -6  -7  258.60   17.57   0
   0   6  -7  256.13   17.14   0
   0   6   7  253.61   18.53   0
  -1  -6  -7   45.34    6.61   0
   1  -6   7   64.88    8.01   0
  -1   6  -7   70.78    7.24   0
   1   6   7   66.79    9.18   0
  -2  -6  -7   31.92    4.13   0
   2  -6   7   35.76    6.66   0
   2   6   7   41.60    6.77   0
  -2   6  -7   40.13    5.94   0
   3  -6   7   12.30    5.97   0
   3   6   7    0.64    6.27   0
  -3   6  -7    1.78    5.28   0
   4  -6   7  112.31   13.16   0
   4   6   7  136.89   13.02   0
  -4   6  -7  112.00   12.41   0
   5  -6   7  -10.97    8.34   0
   5   6   7   -9.55    7.55   0
   6  -6   7   -6.70   10.76   0
   6   6   7    6.77   10.31   0
   7  -7  -7    3.18   17.67   0
   7   7  -7   24.30   10.82   0
   6  -7  -7  171.88   20.85   0
  -6   7   7  202.23   20.03   0
   6   7  -7  173.54   17.14   0
   5  -7  -7    1.31   10.49   0
   5   7  -7    2.09    6.57   0
  -5   7   7   18.59    9.39   0
   4  -7  -7  206.52   19.38   0
  -4  -7   7  214.61   14.37   0
  -4  -7   7  200.37   14.27   0
  -4   7   7  208.89   18.94   0
   4   7  -7  225.49   16.15   0
  -3  -7   7  181.46   13.60   0
   3  -7  -7  169.19   16.45   0
  -3   7   7  158.87   16.37   0
   3   7  -7  181.48   13.75   0
   2  -7  -7  113.95   12.65   0
  -2  -7   7  104.85   10.01   0
   2   7  -7  113.71    9.75   0
  -2   7   7  108.39   12.79   0
  -1  -7   7   59.17    8.15   0
   1  -7  -7   78.43    8.88   0
  -1   7   7   67.68    9.39   0
   1   7  -7   61.17    7.36   0
   0  -7  -7   12.88    4.75   0
   0  -7   7   10.59    5.06   0
   0   7   7   10.79    6.48   0
   0   7  -7   12.41    4.41   0
  -1  -7  -7  476.41   30.01   0
   1  -7   7  469.37   30.78   0
  -1   7  -7  458.54   30.32   0
   1   7   7  471.06   31.30   0
  -2  -7  -7  435.31   27.08   0
   2  -7   7  454.73   29.08   0
  -2   7  -7  415.95   28.57   0
   2   7   7  434.35   29.07   0
   3  -7   7  200.74   16.72   0
  -3   7  -7  198.49   16.08   0
   3   7   7  209.49   16.69   0
   4  -7   7   46.56    9.34   0
   4   7   7   46.00    8.82   0
  -4   7  -7   55.49    8.95   0
   5  -7   7   -2.45    9.32   0
   5   7   7    8.88    8.80   0
   6  -7   7   14.49   17.97   0
   6  -7   7   39.98   12.64   0
   6   7   7   22.75   11.64   0
   7  -8  -7  -28.25   18.28   0
   7   8  -7  -18.81   10.46   0
   6  -8  -7  218.56   26.20   0
  -6   8   7  245.25   23.32   0
   6   8  -7  214.81   19.32   0
   5  -8  -7  113.44   16.63   0
   5   8  -7  126.70   12.87   0
  -5   8   7  113.73   15.16   0
  -4  -8   7    2.58    3.02   0
   4  -8  -7   -2.41    9.55   0
  -4   8   7   13.76    9.49   0
   4   8  -7   -3.06    5.26   0
  -3  -8   7   81.57    9.18   0
  -3  -8   7   72.04    9.25   0
   3  -8  -7  102.53   13.75   0
  -3   8   7   78.50   11.63   0
   3   8  -7   70.32    8.87   0
   2  -8  -7  139.67   15.07   0
  -2  -8   7  150.41   12.48   0
   2   8  -7  149.42   12.00   0
  -2   8   7  152.68   15.62   0
  -1  -8   7   93.27    9.46   0
   1  -8  -7   70.47   10.05   0
  -1   8   7   80.13   10.90   0
   1   8  -7   75.62    8.37   0
   0  -8  -7   40.50    6.80   0
   0  -8   7   43.16    6.88   0
   0   8  -7   46.50    6.31   0
   0   8   7   40.05    8.58   0
   1  -8   7   27.26    6.52   0
  -1  -8  -7   26.79    5.33   0
  -1  -8  -7   17.43    4.99   0
  -1   8  -7   24.54    5.63   0
   1   8   7   29.29    7.77   0
   2  -8   7   42.17    7.77   0
  -2  -8  -7   27.34    3.74   0
  -2  -8  -7   33.00    4.04   0
   2   8   7   36.23    7.90   0
  -2   8  -7   29.78    6.35   0
   3  -8   7  343.31   23.86   0
  -3   8  -7  323.08   23.42   0
   3   8   7  311.85   23.25   0
   4  -8   7  133.03   15.26   0
   4   8   7  116.21   14.58   0
  -4   8  -7  145.33   15.33   0
   5  -8   7   -6.53   10.17   0
   5   8   7    8.31    9.55   0
   6  -8   7   80.91   14.94   0
   6  -8   7   51.51   20.82   0
   6   8   7   66.76   14.32   0
   7  -9  -7  131.66   23.47   0
   7  -9  -7  115.28   24.61   0
   7   9  -7  151.01   18.38   0
   6  -9  -7   20.08   15.29   0
   6   9  -7   12.74    8.59   0
  -6   9   7   22.65   13.63   0
   5  -9  -7   51.87   14.46   0
   5   9  -7   46.01    8.24   0
  -5   9   7   59.58   12.81   0
   4  -9  -7   94.23   14.27   0
  -4   9   7  128.31   16.53   0
   4   9  -7   88.75   10.68   0
  -3  -9   7  133.37   12.24   0
   3  -9  -7  167.60   16.95   0
  -3  -9   7  149.52   12.46   0
   3   9  -7  129.62   12.34   0
  -3   9   7  152.46   16.85   0
  -2  -9   7   14.82    6.54   0
   2  -9  -7   17.72    8.14   0
  -2  -9   7   16.44    5.79   0
   2   9  -7   11.08    5.16   0
  -2   9   7    6.82    8.17   0
   1  -9  -7   46.39    8.28   0
  -1  -9   7   43.67    7.23   0
  -1   9   7   44.42    9.56   0
   1   9  -7   48.27    6.70   0
   0  -9  -7  223.55   16.61   0
   0  -9  -7  210.51   16.62   0
   0  -9   7  205.69   16.67   0
   0   9  -7  221.94   16.18   0
   0   9   7  236.55   18.92   0
  -1  -9  -7   28.09    5.06   0
   1  -9   7   31.50    7.06   0
  -1  -9  -7   29.82    5.80   0
   1   9   7   27.09    8.00   0
  -1   9  -7   32.46    6.39   0
  -2  -9  -7   71.21    6.52   0
  -2   9  -7   83.97   10.59   0
   2   9   7  103.96   12.18   0
   3  -9   7   54.09    9.63   0
  -3   9  -7   66.63    9.91   0
   3   9   7   70.33   10.45   0
   4  -9   7   -6.91    8.80   0
   4  -9   7  -12.17   12.57   0
  -4   9  -7    0.19    8.89   0
   4   9   7    6.14    8.94   0
   5  -9   7   73.63   18.50   0
   5  -9   7   63.57   13.57   0
   5   9   7   97.83   13.15   0
   6  -9   7   22.97   14.57   0
   6  -9   7   46.96   21.40   0
   6   9   7   60.60   14.48   0
   7 -10  -7   22.36   21.82   0
   6 -10  -7  -10.12   16.50   0
   6 -10  -7    1.93   15.78   0
  -6  10   7   14.05   14.83   0
   6  10  -7   11.93    9.16   0
   5 -10  -7  279.85   28.36   0
  -5  10   7  284.02   26.61   0
   5  10  -7  253.41   20.61   0
   4 -10  -7    3.14   11.74   0
   4  10  -7    4.10    6.30   0
  -4  10   7    4.50   11.25   0
  -3 -10   7   86.87   10.06   0
  -3 -10   7   79.40   10.27   0
   3 -10  -7   93.13   12.87   0
   3  10  -7   70.32   10.04   0
  -3  10   7   82.05   13.62   0
  -2 -10   7  174.40   13.83   0
  -2 -10   7  186.85   14.80   0
   2 -10  -7  164.24   17.01   0
  -2  10   7  121.55   16.98   0
   2  10  -7  148.12   13.26   0
  -1 -10   7  139.35   12.96   0
   1 -10  -7  127.81   14.28   0
   1 -10  -7  143.59   14.80   0
  -1 -10   7  149.63   14.91   0
  -1  10   7  136.47   16.10   0
   1  10  -7  146.11   12.36   0
   0 -10  -7    6.26    5.79   0
   0 -10   7   11.70    8.17   0
   0 -10   7    7.56    5.96   0
   0 -10  -7    9.44    6.50   0
   0  10   7    4.57    7.89   0
   0  10  -7   13.12    5.78   0
   1 -10   7  110.94   12.57   0
  -1 -10  -7   93.22   10.08   0
   1 -10   7  129.33   15.16   0
  -1 -10  -7  109.13    9.73   0
   1  10   7   98.76   14.19   0
  -1  10  -7  132.48   12.16   0
   2 -10   7   22.62    7.98   0
   2 -10   7   38.28   10.91   0
  -2 -10  -7   16.09    3.12   0
  -2 -10  -7   15.05    2.51   0
  -2  10  -7   19.39    7.47   0
   2  10   7   10.53    8.31   0
   3 -10   7   20.07   11.99   0
   3 -10   7    3.64    8.37   0
   3  10   7   -4.08    8.71   0
  -3  10  -7   -2.45    8.36   0
   4 -10   7   44.00   14.89   0
   4 -10   7   54.84   11.51   0
   4  10   7   57.37   11.19   0
  -4  10  -7   18.80   10.99   0
   5 -10   7    4.60   18.20   0
   5 -10   7  -11.96   12.01   0
   5  10   7    3.55   11.60   0
   6 -11  -7  -28.07   16.72   0
   6 -11  -7    1.60   19.88   0
  -6  11   7    4.22   16.72   0
   6  11  -7  -11.55    9.88   0
   5 -11  -7   21.92   13.58   0
   5 -11  -7   44.44   16.33   0
   5  11  -7   10.38    8.35   0
  -5  11   7   17.43   14.36   0
   4 -11  -7   72.23   14.42   0
   4 -11  -7   44.43   14.38   0
   4  11  -7   56.34    8.79   0
  -4  11   7   61.44   14.52   0
  -3 -11   7  216.25   17.02   0
   3 -11  -7  231.31   21.07   0
   3 -11  -7  226.59   22.54   0
  -3 -11   7  226.00   17.03   0
  -3  11   7  227.84   22.50   0
   3  11  -7  204.06   17.31   0
  -2 -11   7    5.10    7.34   0
  -2 -11   7   -8.53    5.75   0
   2 -11  -7    7.60    8.44   0
   2 -11  -7    3.48    9.97   0
   2  11  -7   -6.31    5.69   0
  -2  11   7    9.02   10.66   0
  -1 -11   7   84.99   11.28   0
   1 -11  -7   83.01   11.22   0
  -1 -11   7   93.49   10.63   0
   1 -11  -7   93.15   10.59   0
  -1  11   7  102.03   13.66   0
   1  11  -7   84.50   10.00   0
   0 -11  -7    7.58    5.99   0
   0 -11   7   -0.21    6.52   0
   0 -11  -7   -7.45    6.60   0
   0 -11   7   24.10    9.22   0
   0  11  -7   -0.64    6.24   0
   0  11   7   -6.47    9.27   0
   1 -11   7    8.95    9.93   0
  -1 -11  -7    9.48    5.61   0
  -1 -11  -7    0.78    4.50   0
   1 -11   7   -1.48    7.08   0
   1  11   7    3.41    9.44   0
  -1  11  -7    5.21    6.82   0
   2 -11   7   95.72   13.15   0
   2 -11   7   90.20   13.69   0
   2  11   7   60.35   11.60   0
  -2  11  -7   72.92   10.74   0
   3 -11   7   -5.75   13.00   0
   3 -11   7   -1.01    9.62   0
  -3  11  -7   -2.50    9.67   0
   3  11   7   -3.50    9.72   0
   4 -11   7    1.45   10.78   0
   4 -11   7  -28.63   15.68   0
  -4  11  -7  -11.32   11.99   0
   4  11   7    0.49   10.62   0
   5 -11   7   20.31   20.25   0
   5 -11   7   44.27   15.10   0
   5  11   7   47.22   13.97   0
   6 -12  -7  -23.26   19.45   0
   6 -12  -7   24.43   21.21   0
   6  12  -7   -0.29   11.15   0
  -6  12   7   -4.00   21.02   0
   5 -12  -7   30.16   18.27   0
   5 -12  -7   57.03   16.54   0
   5  12  -7   24.29    9.65   0
  -5  12   7   27.88   16.31   0
   4 -12  -7    6.08   12.33   0
   4 -12  -7  -27.41   14.08   0
   4  12  -7   -3.29    7.75   0
  -4  12   7   22.95   14.20   0
  -3 -12   7    9.22    6.66   0
   3 -12  -7   -5.74   10.69   0
  -3 -12   7    8.44    6.51   0
   3 -12  -7    7.06   12.62   0
  -3  12   7  -10.31   11.69   0
   3  12  -7   -4.61    7.07   0
   2 -12  -7   12.80   11.12   0
   2 -12  -7   14.23    9.89   0
  -2 -12   7   26.32    7.54   0
  -2 -12   7   17.45    8.26   0
  -2  12   7   26.59   12.53   0
   2  12  -7   11.48    7.40   0
  -1 -12   7   64.57    9.22   0
   1 -12  -7   56.23    9.65   0
  -1 -12   7   66.25   10.78   0
   1 -12  -7   52.30   10.30   0
  -1  12   7   23.04   11.75   0
   1  12  -7   58.99    8.90   0
   0 -12  -7   27.21    6.94   0
   0 -12   7   31.80   11.08   0
   0 -12   7   35.15    8.37   0
   0 -12  -7   34.22    8.68   0
   0  12   7   48.00   11.89   0
   0  12  -7   27.70    7.91   0
  -1 -12  -7    5.43    5.94   0
   1 -12   7    2.33    8.03   0
  -1 -12  -7   -0.72    4.78   0
   1 -12   7    5.31   11.06   0
  -1  12  -7    1.63    7.90   0
   1  12   7    1.39    9.95   0
   2 -12   7   27.20    9.35   0
   2 -12   7    3.09   12.99   0
   2  12   7   16.12   10.94   0
  -2  12  -7    9.57    9.65   0
   3 -12   7    8.00   14.95   0
   3 -12   7   44.84   11.84   0
  -3  12  -7   21.86   11.71   0
   3  12   7   15.13   11.60   0
   4 -12   7   19.38   18.00   0
   4 -12   7    2.21   13.13   0
  -4  12  -7   10.09   14.12   0
   4  12   7   33.78   13.23   0
   5 -12   7  -40.92   20.64   0
   5  12   7  -12.94   14.74   0
   5 -13  -7    5.73   18.64   0
   5 -13  -7    7.19   15.08   0
  -5  13   7    4.14   18.99   0
   5  13  -7   10.15   10.85   0
   4 -13  -7   21.19   13.21   0
   4 -13  -7  -21.50   16.52   0
   4  13  -7   20.79    9.37   0
  -4  13   7  -13.33   14.55   0
   3 -13  -7  131.92   17.02   0
   3 -13  -7  156.32   21.56   0
  -3 -13   7  139.19   13.09   0
  -3 -13   7  117.47   13.18   0
   3  13  -7  113.06   14.89   0
  -3  13   7   94.89   18.21   0
  -2 -13   7   16.37    7.84   0
   2 -13  -7   -0.47   11.60   0
  -2 -13   7   -1.05    9.06   0
   2 -13  -7    7.82   10.38   0
  -2  13   7   -0.26   13.36   0
   2  13  -7    7.06    8.36   0
   1 -13  -7    2.78   10.04   0
   1 -13  -7   -5.12    8.16   0
  -1 -13   7    9.43    9.85   0
  -1 -13   7    1.75    8.11   0
   1  13  -7    6.64    8.04   0
  -1  13   7    3.89   11.79   0
   0 -13   7    2.50    8.59   0
   0 -13  -7   -6.18    6.40   0
   0 -13   7    5.59   10.98   0
   0 -13  -7    9.48    8.18   0
   0  13  -7   -7.81    8.15   0
   0  13   7  -17.29   11.20   0
   1 -13   7   15.59   13.15   0
  -1 -13  -7   12.30    5.15   0
   1 -13   7   38.30   10.17   0
  -1 -13  -7   21.45    6.81   0
  -1  13  -7   23.85   10.44   0
   1  13   7   27.58   12.25   0
   2 -13   7  -12.68   14.42   0
   2 -13   7   10.06   10.67   0
  -2  13  -7   -1.56   11.24   0
   2  13   7   -9.48   11.80   0
   3 -13   7    7.18   16.19   0
   3 -13   7    2.76   12.11   0
  -3  13  -7    6.20   13.45   0
   3  13   7  -12.76   12.47   0
   4 -13   7  -40.41   18.27   0
   4 -13   7  -19.74   14.83   0
   4  13   7  -20.29   14.44   0
  -4  13  -7  -12.47   15.35   0
   4 -14  -7   -4.91   15.97   0
   4 -14  -7   22.88   18.75   0
  -4  14   7   -2.17   18.42   0
   4  14  -7    2.32   10.85   0
  -3 -14   7   13.98    7.32   0
  -3 -14   7   12.31    7.15   0
   3 -14  -7    9.17   15.59   0
   3 -14  -7   -5.36   13.10   0
  -3  14   7   14.62   15.63   0
   3  14  -7   14.03    9.86   0
   2 -14  -7  -11.05   10.88   0
   2 -14  -7   24.65   13.36   0
  -2 -14   7    3.48    8.62   0
  -2 -14   7   13.31   10.30   0
  -2  14   7  -18.80   14.19   0
   2  14  -7    5.32    9.62   0
  -1 -14   7   53.16   10.08   0
  -1 -14   7   32.62   12.17   0
   1 -14  -7   52.90   10.10   0
   1 -14  -7   57.95   12.21   0
   1  14  -7   26.09   11.05   0
  -1  14   7   56.48   14.79   0
   0 -14  -7    1.14    7.23   0
   0 -14  -7   -6.33    9.45   0
   0 -14   7   22.38   12.92   0
   0 -14   7    6.70    9.12   0
   0  14   7   12.20   12.79   0
   0  14  -7   16.77    9.98   0
  -1 -14  -7   26.47    7.61   0
   1 -14   7   30.98   14.80   0
   1 -14   7   10.90   11.32   0
  -1 -14  -7   14.85    5.63   0
   1  14   7    4.72   12.64   0
  -1  14  -7    6.69   10.79   0
   2 -14   7   22.26   13.26   0
   2 -14   7   14.77   16.85   0
  -2  14  -7   11.59   13.30   0
   2  14   7    3.92   13.49   0
   3 -14   7   24.60   14.07   0
   3 -14   7    4.56   19.31   0
   3  14   7   10.53   15.30   0
  -3  14  -7   19.39   15.22   0
   4 -15  -7   28.23   20.59   0
   3 -15  -7   -5.51   14.60   0
  -3 -15   7    6.61    6.25   0
  -3 -15   7    9.40    6.86   0
   3 -15  -7   24.65   17.23   0
   3  15  -7   15.46   12.18   0
  -3  15   7   20.69   19.34   0
  -2 -15   7   45.86   11.78   0
   2 -15  -7    5.74   11.53   0
   2 -15  -7   -7.43   15.15   0
  -2 -15   7   42.72   10.55   0
   2  15  -7   10.79   11.44   0
  -2  15   7   30.29   16.85   0
  -1 -15   7   14.44   10.12   0
   1 -15  -7   23.20   13.04   0
  -1 -15   7    5.20   13.18   0
   1 -15  -7   14.21    9.77   0
  -1  15   7   -7.54   15.66   0
   1  15  -7   -6.44   11.22   0
   0 -15   7   32.04   15.22   0
   0 -15  -7   10.01    7.84   0
   0 -15   7   -3.86   10.76   0
   0 -15  -7   16.64   10.74   0
   0  15   7   30.20   15.36   0
   0  15  -7   38.08   12.67   0
  -1 -15  -7    0.66    7.75   0
  -1 -15  -7    1.39    5.77   0
   1 -15   7    4.99   12.67   0
   1 -15   7    6.49   16.09   0
   1  15   7   21.45   14.83   0
  -1  15  -7  -12.10   13.80   0
   2 -15   7   21.07   18.92   0
   2 -15   7   13.37   15.78   0
   2  15   7  -16.24   15.49   0
  -2  15  -7    0.24   14.77   0
  -2 -16   7   -5.46   12.57   0
   2 -16  -7  -31.52   12.64   0
  -2 -16   7    6.83   11.03   0
   2 -16  -7  -17.22   16.03   0
   2  16  -7   29.35   14.31   0
  -2  16   7   30.19   19.41   0
  -1 -16   7   17.07   14.96   0
   1 -16  -7    0.87   14.82   0
   1 -16  -7   -6.36   10.45   0
  -1 -16   7   -0.26   12.04   0
   1  16  -7   39.97   14.14   0
  -1  16   7  -39.08   17.24   0
   0 -16   7    9.30   16.85   0
   0 -16  -7   -4.78    8.35   0
   0 -16   7   -0.57   12.55   0
   0 -16  -7   41.04   12.28   0
   0  16  -7   17.01   15.03   0
   0  16   7   24.28   17.97   0
  -1 -16  -7   -8.80    6.32   0
   1 -16   7   15.69   15.41   0
   1 -16   7    8.92   19.38   0
  -1 -16  -7   -0.52    8.27   0
   1  16   7   -4.04   17.41   0
  -1  16  -7  -11.60   15.14   0
   8   0  -8   29.09   17.59   0
   7   0  -8   63.34   13.81   0
   6   0  -8   39.43   10.36   0
  -6   0   8   41.51    7.27   0
   5   0  -8  568.62   36.44   0
  -5   0   8  519.31   35.34   0
  -4   0   8   97.73   11.03   0
   4   0  -8   95.14   11.73   0
   3   0  -8 1534.06   95.49   0
  -3   0   8 1566.75   95.74   0
  -2   0   8   25.18    6.00   0
   2   0  -8   19.85    5.33   0
   1   0  -8   71.47    8.10   0
  -1   0   8   79.76    8.59   0
   0   0  -8   17.67    4.27   0
   0   0   8   19.59    5.21   0
   1   0   8   92.33    9.28   0
  -1   0  -8   78.17    7.67   0
   2   0   8  158.24   13.62   0
  -2   0  -8  176.49   12.21   0
  -3   0  -8  227.01   15.79   0
   3   0   8  241.55   17.75   0
  -4   0  -8   11.43    4.29   0
   4   0   8    2.84    6.61   0
   5   0   8   80.12   10.86   0
   6   0   8  252.51   22.04   0
   7   0   8    7.15   13.78   0
   8  -1  -8   -2.73   17.47   0
   8   1  -8    4.73   16.02   0
   7  -1  -8   40.26   13.72   0
   7   1  -8   47.37   13.23   0
  -6  -1   8   25.91    5.79   0
   6  -1  -8   27.55   10.60   0
  -6   1   8   31.87    7.43   0
   6   1  -8   27.54    9.63   0
  -5  -1   8  411.04   27.71   0
   5  -1  -8  407.25   29.51   0
  -5   1   8  410.38   28.33   0
   5   1  -8  431.67   29.06   0
  -4  -1   8   33.88    6.90   0
   4  -1  -8   37.63    7.87   0
   4   1  -8   48.78    7.66   0
  -4   1   8   39.28    7.57   0
   3  -1  -8   48.76    7.36   0
  -3  -1   8   48.12    7.18   0
  -3   1   8   33.08    7.07   0
   3   1  -8   31.77    6.56   0
  -2  -1   8   15.45    5.12   0
   2  -1  -8    0.88    4.74   0
   2   1  -8    2.53    4.69   0
  -2   1   8    5.59    5.34   0
   1  -1  -8  181.76   13.62   0
  -1  -1   8  181.29   13.83   0
  -1   1   8  174.24   14.05   0
   1   1  -8  177.82   13.40   0
   0  -1   8  139.52   12.21   0
   0  -1  -8  161.11   11.72   0
   0   1   8  151.24   12.27   0
   0   1  -8  149.34   11.52   0
  -1  -1  -8  286.06   19.43   0
   1  -1   8  294.71   20.39   0
   1   1   8  280.09   20.43   0
  -1   1  -8  308.74   19.58   0
   2  -1   8    0.77    5.32   0
  -2  -1  -8    0.37    3.17   0
  -2   1  -8    2.83    3.45   0
   2   1   8   -0.57    5.24   0
   3  -1   8   46.10    7.25   0
  -3  -1  -8   40.39    5.62   0
   3   1   8   34.78    7.42   0
  -3   1  -8   35.08    5.19   0
  -4  -1  -8  191.21   14.04   0
   4  -1   8  223.74   17.24   0
   4   1   8  208.47   17.05   0
  -4   1  -8  223.53   15.12   0
   5  -1   8  108.96   14.28   0
   5   1   8  168.47   15.18   0
   6  -1   8   10.73   10.73   0
   6   1   8   27.57   10.76   0
   7  -1   8   25.57   14.30   0
   7   1   8   -2.28   13.72   0
   8  -2  -8  -11.31   17.54   0
   8   2  -8   -1.30   15.67   0
   7  -2  -8  109.63   16.79   0
   7   2  -8  139.71   18.81   0
   6  -2  -8   48.38   11.44   0
  -6  -2   8   39.35    5.33   0
  -6   2   8   42.10    8.49   0
   6   2  -8   46.41    9.89   0
  -5  -2   8   -6.61    4.89   0
   5  -2  -8    9.41    8.37   0
   5   2  -8   12.25    6.95   0
  -5   2   8    0.70    6.70   0
   4  -2  -8    1.90    6.63   0
  -4  -2   8    6.93    5.25   0
  -4   2   8    7.64    6.21   0
   4   2  -8    3.82    6.03   0
  -3  -2   8  112.03   10.99   0
   3  -2  -8  101.91   11.45   0
  -3   2   8  108.78   11.69   0
   3   2  -8  120.47   10.96   0
   2  -2  -8  123.81   11.30   0
  -2  -2   8  109.62   10.65   0
   2   2  -8  128.47   10.67   0
  -2   2   8  110.61   11.30   0
  -1  -2   8   55.15    7.23   0
   1  -2  -8   58.72    7.69   0
   1   2  -8   52.14    6.45   0
  -1   2   8   57.93    7.58   0
   0  -2  -8   20.48    4.86   0
   0  -2   8   28.74    5.78   0
   0   2   8   20.45    5.67   0
   0   2  -8   26.40    4.76   0
   1  -2   8   62.95    8.22   0
  -1  -2  -8   63.51    6.88   0
  -1   2  -8   63.21    6.73   0
   1   2   8   62.47    8.88   0
  -2  -2  -8   97.72    8.17   0
   2  -2   8  102.82   10.31   0
  -2   2  -8   98.96    8.60   0
   2   2   8  105.01   10.85   0
   3  -2   8  500.56   31.69   0
  -3  -2  -8  453.21   29.74   0
  -3   2  -8  471.20   30.51   0
   3   2   8  488.88   31.68   0
   4  -2   8    1.07    6.81   0
  -4   2  -8    9.97    5.23   0
   4   2   8   14.42    7.19   0
   5  -2   8  270.27   22.16   0
   5   2   8  289.51   21.75   0
   6  -2   8   88.62   13.11   0
   6   2   8   93.11   13.25   0
   7  -2   8   -3.76   13.82   0
   7   2   8   30.31   14.81   0
   8  -3  -8   -4.97   19.11   0
   8   3  -8   24.38   15.52   0
   7  -3  -8   15.13   14.20   0
  -7   3   8   11.02    8.81   0
   7   3  -8    8.91   11.21   0
   6  -3  -8   -6.82   10.62   0
  -6   3   8    1.04    7.91   0
   6   3  -8   -9.95    7.89   0
  -5  -3   8   32.30    5.80   0
   5  -3  -8   35.36    9.90   0
   5   3  -8   31.06    7.89   0
  -5   3   8   53.86    8.84   0
   4  -3  -8   31.13    8.42   0
  -4  -3   8   36.50    6.47   0
   4   3  -8   38.75    7.04   0
  -4   3   8   41.39    8.32   0
   3  -3  -8   59.70    8.48   0
  -3  -3   8   44.62    7.24   0
  -3   3   8   68.40    9.02   0
   3   3  -8   53.30    7.60   0
   2  -3  -8   44.31    7.02   0
  -2  -3   8   47.51    6.92   0
  -2   3   8   37.43    7.47   0
   2   3  -8   46.76    6.35   0
  -1  -3   8  234.11   17.28   0
   1  -3  -8  240.89   17.31   0
   1   3  -8  237.00   16.74   0
  -1   3   8  245.09   17.78   0
   0  -3  -8   87.78    8.67   0
   0  -3   8   71.05    8.86   0
   0   3  -8   92.48    8.04   0
   0   3   8   74.18    9.30   0
   1  -3   8   68.52    9.21   0
  -1  -3  -8   92.66    8.17   0
   1   3   8   98.20    9.83   0
  -1   3  -8   86.71    8.17   0
  -2  -3  -8   65.91    6.76   0
   2  -3   8   71.14    9.52   0
   2   3   8   80.89    9.86   0
  -2   3  -8   66.36    7.61   0
   3  -3   8  700.67   47.24   0
  -3  -3  -8  711.65   45.58   0
  -3   3  -8  773.46   46.71   0
   3   3   8  795.41   47.52   0
   4  -3   8   87.51   11.75   0
   4   3   8   88.09   10.43   0
   5  -3   8   29.56    9.73   0
   5   3   8   31.71    9.16   0
   6  -3   8   11.45   11.36   0
   6   3   8   15.22   10.87   0
   7  -3   8   27.36   15.62   0
   7   3   8   30.92   14.63   0
   8  -4  -8    3.43   20.28   0
   8   4  -8    3.93   14.88   0
   7  -4  -8   43.32   15.71   0
   7   4  -8   -0.24   10.95   0
  -7   4   8   37.61   10.39   0
   6  -4  -8   29.69   12.11   0
   6   4  -8   24.08    8.49   0
  -6   4   8   11.28    8.52   0
   5  -4  -8   14.38    9.30   0
  -5  -4   8    4.37    4.32   0
   5   4  -8    5.78    6.61   0
  -5   4   8   12.72    7.83   0
   4  -4  -8   31.48    8.27   0
  -4  -4   8   33.22    6.12   0
   4   4  -8   30.18    6.94   0
  -4   4   8   25.97    8.15   0
  -3  -4   8   57.07    7.31   0
   3  -4  -8   47.23    8.58   0
  -3   4   8   49.21    8.92   0
   3   4  -8   57.66    7.46   0
   2  -4  -8   44.29    7.72   0
  -2  -4   8   57.94    7.32   0
  -2   4   8   54.45    8.51   0
   2   4  -8   50.49    6.53   0
   1  -4  -8    5.12    5.10   0
  -1  -4   8    6.74    4.81   0
  -1   4   8    3.10    5.33   0
   1   4  -8    5.54    4.11   0
   0  -4   8   15.00    5.14   0
   0  -4  -8    7.92    4.59   0
   0   4   8   16.60    6.03   0
   0   4  -8   13.55    4.23   0
   1  -4   8  327.85   23.16   0
  -1  -4  -8  347.14   22.39   0
   1   4   8  337.81   23.44   0
  -1   4  -8  346.82   22.50   0
   2  -4   8  256.71   17.49   0
  -2  -4  -8  208.66   15.46   0
   2   4   8  244.55   17.71   0
  -2   4  -8  225.85   16.25   0
   3  -4   8  250.15   18.66   0
  -3  -4  -8  229.94   15.52   0
  -3   4  -8  250.07   17.59   0
   3   4   8  256.09   18.75   0
   4  -4   8    1.23    7.10   0
   4   4   8   12.89    8.04   0
  -4   4  -8   17.42    6.29   0
   5   4   8   14.44    9.05   0
   6  -4   8   12.02   11.46   0
   6   4   8   16.76   11.31   0
   8  -5  -8   38.87   21.76   0
   8   5  -8    4.25   14.19   0
   7  -5  -8   20.61   16.01   0
   7   5  -8   -7.56   10.36   0
  -7   5   8    9.62   10.56   0
   6  -5  -8    1.65   12.32   0
  -6   5   8   12.90    9.32   0
   6   5  -8   24.10    8.47   0
  -5  -5   8   50.31    6.10   0
   5  -5  -8   67.52   11.42   0
  -5   5   8   66.45   10.96   0
   5   5  -8   55.93    8.68   0
   4  -5  -8    1.45    8.17   0
  -4  -5   8    9.45    5.37   0
  -4   5   8    1.67    7.02   0
   4   5  -8    7.19    5.89   0
   3  -5  -8   -0.37    7.03   0
  -3  -5   8    4.30    4.96   0
   3   5  -8    1.95    4.88   0
  -3   5   8    1.44    7.10   0
   2  -5  -8   -0.47    5.96   0
  -2  -5   8   -0.44    4.84   0
   2   5  -8    7.91    4.46   0
  -2   5   8    9.52    6.21   0
   1  -5  -8  180.10   14.25   0
  -1  -5   8  159.25   13.39   0
   1   5  -8  168.49   12.99   0
  -1   5   8  176.04   14.91   0
   0  -5  -8   74.40    8.38   0
   0  -5   8   66.36    9.00   0
   0   5   8   80.21    9.40   0
   0   5  -8   71.06    7.69   0
  -1  -5  -8  126.76   10.16   0
   1  -5   8  120.54   11.26   0
   1   5   8  125.60   11.66   0
  -1   5  -8  111.16   10.18   0
   2  -5   8    2.39    5.28   0
   2   5   8  -11.13    5.59   0
  -2   5  -8   -4.58    4.20   0
   3  -5   8   26.24    7.51   0
   3   5   8   40.89    8.16   0
  -3   5  -8   42.21    6.64   0
   4  -5   8  120.14   13.82   0
   4   5   8  130.39   14.31   0
  -4   5  -8  111.17   12.49   0
   5  -5   8   48.59   10.72   0
   5   5   8   31.20   10.26   0
   6  -5   8   49.01   13.00   0
   6   5   8   15.18   12.06   0
   7  -6  -8   21.07   16.83   0
   7   6  -8   18.85   10.76   0
  -7   6   8    5.85   11.52   0
   6  -6  -8   24.16   13.41   0
   6   6  -8    8.06    8.96   0
  -6   6   8   10.44   10.47   0
   5  -6  -8   -9.09   10.03   0
   5   6  -8   -5.18    6.78   0
  -5   6   8    2.13    9.12   0
   4  -6  -8    9.50    8.39   0
  -4  -6   8   -0.13    4.77   0
   4   6  -8    3.02    5.84   0
  -4   6   8  -16.70    7.64   0
  -3  -6   8   26.49    6.12   0
   3  -6  -8   16.19    7.82   0
   3   6  -8   13.20    5.34   0
  -3   6   8    9.43    8.28   0
   2  -6  -8   61.07    9.04   0
  -2  -6   8   56.53    7.80   0
  -2   6   8   51.71    9.67   0
   2   6  -8   65.33    7.80   0
  -1  -6   8  162.17   13.83   0
   1  -6  -8  170.68   14.54   0
   1   6  -8  178.30   13.21   0
  -1   6   8  173.41   15.46   0
   0  -6  -8  191.44   13.85   0
   0  -6   8  173.07   14.44   0
   0   6   8  178.16   15.47   0
   0   6  -8  174.14   13.48   0
  -1  -6  -8  163.56   11.97   0
   1  -6   8  139.28   12.97   0
  -1   6  -8  150.53   12.10   0
   1   6   8  141.32   13.81   0
   2  -6   8  121.97   12.08   0
  -2  -6  -8   98.07    9.04   0
  -2   6  -8  129.94   10.72   0
   2   6   8  117.94   12.34   0
   3  -6   8   25.38    7.62   0
   3   6   8   21.43    7.95   0
  -3   6  -8   28.86    6.73   0
   4  -6   8    1.81    8.25   0
  -4   6  -8   14.13    7.21   0
   4   6   8    7.84    8.20   0
   5  -6   8   15.10   10.13   0
   5   6   8   24.87    9.90   0
   6  -6   8   23.37   13.43   0
   6   6   8   70.42   13.73   0
   7  -7  -8   30.85   18.83   0
   7   7  -8    5.28   11.32   0
  -7   7   8  -23.93   12.82   0
   6  -7  -8   -1.68   13.73   0
   6   7  -8   17.11    9.41   0
  -6   7   8   21.31   11.65   0
   5  -7  -8   10.09   11.23   0
   5   7  -8    0.56    7.11   0
  -5   7   8   17.04   10.14   0
  -4  -7   8   18.87    5.35   0
   4  -7  -8    4.53    9.45   0
  -4   7   8    7.71    9.91   0
   4   7  -8    7.04    6.03   0
  -3  -7   8    0.78    5.44   0
   3  -7  -8   -3.01    8.09   0
   3   7  -8    5.11    5.21   0
  -3   7   8   -2.71    8.51   0
  -2  -7   8   69.25    9.16   0
   2  -7  -8   85.31   10.44   0
  -2   7   8   56.39   10.19   0
   2   7  -8   63.85    8.49   0
  -1  -7   8   48.72    7.42   0
   1  -7  -8   53.78    8.36   0
  -1   7   8   59.70    9.48   0
   1   7  -8   56.42    7.74   0
   0  -7   8   58.24    8.14   0
   0  -7  -8   62.41    8.59   0
   0   7  -8   56.05    6.99   0
   0   7   8   65.41    9.77   0
   1  -7   8  137.70   13.11   0
  -1  -7  -8  151.48   11.93   0
  -1   7  -8  143.78   12.16   0
   1   7   8  151.77   14.05   0
  -2  -7  -8   45.68    6.53   0
  -2  -7  -8   59.35    6.77   0
   2  -7   8   72.75    9.16   0
   2   7   8   65.15    9.50   0
  -2   7  -8   64.65    7.93   0
   3  -7   8    0.90    7.18   0
   3   7   8   10.85    7.75   0
  -3   7  -8    4.03    6.42   0
   4  -7   8   79.25   11.78   0
   4   7   8   77.88   11.48   0
  -4   7  -8  112.75   13.45   0
   5  -7   8   27.69   11.31   0
   5   7   8   -6.11   10.28   0
   6  -7   8   -1.44   14.04   0
   6   7   8  -15.12   13.58   0
   7  -8  -8   52.26   19.89   0
   6  -8  -8   29.08   15.61   0
  -6   8   8   15.45   12.70   0
   6   8  -8    4.55    9.10   0
   5  -8  -8    6.96   12.59   0
   5   8  -8   -0.55    7.11   0
  -5   8   8  -16.16    9.79   0
   4  -8  -8   18.04   11.19   0
  -4  -8   8   28.04    5.85   0
  -4  -8   8   20.13    5.33   0
   4   8  -8   22.07    6.62   0
  -4   8   8   27.92   10.81   0
  -3  -8   8    1.96    5.72   0
   3  -8  -8    6.40    8.42   0
  -3   8   8   -3.52    8.75   0
   3   8  -8    1.70    5.29   0
  -2  -8   8   83.87    9.30   0
   2  -8  -8   87.83   10.91   0
  -2   8   8   61.89   11.53   0
   2   8  -8   65.63    9.20   0
   1  -8  -8  138.53   13.77   0
  -1  -8   8  142.71   12.88   0
  -1   8   8  122.25   14.90   0
   1   8  -8  129.38   11.52   0
   0  -8  -8  106.82   11.02   0
   0  -8   8   90.54   11.18   0
   0   8   8  121.60   13.38   0
   0   8  -8  111.78   10.41   0
  -1  -8  -8  321.22   19.35   0
   1  -8   8  218.76   20.10   0
  -1   8  -8  251.20   19.59   0
   1   8   8  313.49   21.69   0
   2  -8   8   -0.94    6.64   0
  -2  -8  -8    6.28    3.85   0
  -2  -8  -8    9.56    3.53   0
   2   8   8   11.71    8.18   0
  -2   8  -8    5.83    5.97   0
   3  -8   8   12.37    8.10   0
   3   8   8   -0.98    8.55   0
  -3   8  -8   20.52    7.64   0
   4  -8   8   25.98    9.87   0
  -4   8  -8   25.55    9.56   0
   4   8   8   19.34    9.62   0
   5  -8   8   13.44   11.95   0
   5   8   8   13.07   11.75   0
   6  -8   8  -38.90   21.12   0
   6  -8   8   -2.87   15.27   0
   6   8   8   16.24   14.96   0
   7  -9  -8   23.40   20.39   0
  -7   9   8  -16.80   16.36   0
   7   9  -8    2.17   12.17   0
   6  -9  -8   -2.20   16.63   0
  -6   9   8   22.87   14.95   0
   6   9  -8   14.66    9.57   0
   5  -9  -8  -19.10   12.92   0
  -5   9   8   -6.15   12.78   0
   5   9  -8    6.17    7.43   0
  -4  -9   8   -0.33    4.77   0
   4  -9  -8   -2.70   10.81   0
  -4  -9   8    0.68    4.67   0
   4   9  -8   -6.58    6.05   0
  -4   9   8   -5.67   10.32   0
  -3  -9   8   19.90    6.92   0
  -3  -9   8   16.86    6.78   0
   3  -9  -8   23.00   10.17   0
   3   9  -8   21.34    6.39   0
  -3   9   8    8.28    9.74   0
  -2  -9   8   21.43    6.85   0
   2  -9  -8   25.94    9.13   0
  -2   9   8   13.15    9.58   0
   2   9  -8   19.32    5.80   0
  -1  -9   8   -7.15    5.98   0
   1  -9  -8   -2.90    7.08   0
   1   9  -8    1.53    5.25   0
  -1   9   8    4.96    8.38   0
   0  -9  -8    3.77    5.89   0
   0  -9   8   12.49    6.81   0
   0   9   8   16.44    8.30   0
   0   9  -8    7.55    5.56   0
  -1  -9  -8  107.33   11.05   0
  -1  -9  -8  147.04   11.54   0
   1  -9   8  126.52   13.25   0
   1   9   8  125.08   14.85   0
  -1   9  -8  135.37   12.54   0
  -2  -9  -8   13.18    3.46   0
  -2  -9  -8    0.56    3.70   0
   2  -9   8   -1.45    7.92   0
  -2   9  -8    9.80    7.05   0
   2   9   8   17.99    8.47   0
   3  -9   8   -1.03    8.91   0
   3   9   8   14.40    9.36   0
  -3   9  -8    5.59    8.49   0
   4  -9   8   21.19   10.86   0
   4   9   8   18.12   10.00   0
  -4   9  -8    0.90   10.08   0
   5  -9   8   37.63   18.45   0
   5  -9   8   45.66   13.64   0
   5   9   8   54.83   13.21   0
   6 -10  -8    6.08   18.32   0
  -6  10   8   23.13   16.31   0
   6  10  -8   -0.17    9.85   0
   5 -10  -8   43.15   15.47   0
   5  10  -8   -2.47    8.01   0
  -5  10   8  -10.94   13.32   0
  -4 -10   8   20.91    4.61   0
   4 -10  -8   25.02   12.48   0
  -4 -10   8   15.38    4.26   0
   4  10  -8    8.46    7.03   0
  -4  10   8   11.70   12.52   0
  -3 -10   8   -3.75    6.75   0
  -3 -10   8    4.26    6.81   0
   3 -10  -8   16.46   10.56   0
  -3  10   8    8.67   10.85   0
   3  10  -8    1.59    6.15   0
   2 -10  -8   46.16   10.35   0
  -2 -10   8   35.96    8.74   0
  -2 -10   8   57.73    8.51   0
   2  10  -8   38.85    7.57   0
  -2  10   8   46.30   11.61   0
  -1 -10   8  130.41   14.00   0
   1 -10  -8  160.27   15.93   0
  -1  10   8  142.67   17.34   0
   1  10  -8  161.40   13.38   0
   0 -10  -8   80.26    9.31   0
   0 -10   8   66.48    9.63   0
   0 -10  -8   62.34    8.94   0
   0  10   8   73.43   12.23   0
   0  10  -8   80.83    9.18   0
  -1 -10  -8    5.79    5.00   0
  -1 -10  -8   16.87    5.91   0
   1 -10   8   20.29    7.85   0
   1  10   8    1.47    8.76   0
  -1  10  -8   22.02    7.29   0
  -2 -10  -8   20.84    3.93   0
   2 -10   8    6.19    8.94   0
  -2 -10  -8   17.77    3.18   0
  -2  10  -8    6.76    7.63   0
   2  10   8   12.94    9.28   0
   3 -10   8   34.39   10.89   0
  -3  10  -8   54.47   10.52   0
   3  10   8   51.33   11.60   0
   4 -10   8   26.25   16.28   0
   4 -10   8    8.69   11.34   0
   4  10   8   19.43   11.08   0
  -4  10  -8   13.88   11.85   0
   5 -10   8  -19.22   19.51   0
   5 -10   8   -0.84   14.18   0
   5  10   8    3.73   13.99   0
   6 -11  -8  -21.17   18.95   0
   6 -11  -8  -33.00   18.27   0
  -6  11   8   25.35   18.24   0
   6  11  -8   22.32   11.73   0
   5 -11  -8   61.39   17.33   0
   5 -11  -8   80.78   19.08   0
   5  11  -8   62.95   11.10   0
  -5  11   8   89.96   18.22   0
   4 -11  -8   94.85   16.20   0
   4  11  -8   85.81   10.90   0
  -4  11   8   93.78   17.83   0
  -3 -11   8   93.84   10.95   0
   3 -11  -8   89.83   15.28   0
  -3 -11   8  110.28   12.44   0
   3 -11  -8   89.42   14.45   0
  -3  11   8  116.14   16.69   0
   3  11  -8  101.85   12.11   0
   2 -11  -8   62.95   11.76   0
  -2 -11   8   30.77    9.16   0
  -2 -11   8   42.11    8.39   0
   2 -11  -8   44.74   11.73   0
  -2  11   8   16.38   12.25   0
   2  11  -8   33.41    7.89   0
  -1 -11   8  113.91   13.48   0
  -1 -11   8  128.87   15.92   0
   1 -11  -8  124.60   15.31   0
   1 -11  -8  125.18   15.06   0
  -1  11   8  123.16   15.64   0
   1  11  -8  122.67   13.26   0
   0 -11  -8   20.16    7.44   0
   0 -11   8    1.90   10.09   0
   0 -11   8   17.92    8.24   0
   0 -11  -8   24.23    6.94   0
   0  11   8    6.62   10.40   0
   0  11  -8   16.13    6.95   0
   1 -11   8   74.99   13.14   0
  -1 -11  -8   64.37    8.82   0
  -1 -11  -8   59.78    8.32   0
   1 -11   8   70.81   10.72   0
   1  11   8   65.80   12.31   0
  -1  11  -8   71.82   10.36   0
   2 -11   8   17.79   12.87   0
   2 -11   8    4.18    9.81   0
  -2 -11  -8    9.25    2.86   0
  -2  11  -8    2.96    7.99   0
   2  11   8   -8.23   10.43   0
   3 -11   8   14.57   10.93   0
   3 -11   8   38.94   15.56   0
   3  11   8   24.33   11.93   0
  -3  11  -8   11.14   10.66   0
   4 -11   8   92.97   19.61   0
   4 -11   8   53.77   14.08   0
   4  11   8   58.06   14.78   0
  -4  11  -8   77.86   15.22   0
   5 -11   8   23.92   21.11   0
   5 -11   8   50.99   22.71   0
   5  11   8   52.35   16.86   0
   5 -12  -8   44.40   18.38   0
   5 -12  -8   46.32   18.33   0
  -5  12   8   31.86   18.19   0
   5  12  -8    6.72   10.55   0
   4 -12  -8   -4.69   15.39   0
   4 -12  -8   28.06   13.88   0
   4  12  -8    8.09    8.98   0
  -4  12   8   23.60   14.91   0
  -3 -12   8   84.42   10.54   0
   3 -12  -8  105.78   15.49   0
   3 -12  -8   88.26   16.08   0
  -3 -12   8   73.10   10.47   0
  -3  12   8   98.99   16.90   0
   3  12  -8   74.30   10.84   0
  -2 -12   8   83.73   10.55   0
   2 -12  -8   64.10   13.83   0
   2 -12  -8   74.27   12.24   0
  -2 -12   8   53.42   11.00   0
   2  12  -8   56.81    9.59   0
  -2  12   8   86.85   15.45   0
  -1 -12   8   18.86    8.44   0
   1 -12  -8   27.55    9.00   0
   1 -12  -8    9.62    9.38   0
  -1 -12   8   25.91   10.46   0
  -1  12   8   21.53   12.63   0
   1  12  -8   18.62    8.09   0
   0 -12   8   11.89    8.90   0
   0 -12  -8    4.85    8.28   0
   0 -12   8   10.46   11.39   0
   0 -12  -8   23.32    7.26   0
   0  12   8   14.26   11.39   0
   0  12  -8   -1.99    7.84   0
   1 -12   8   34.98   13.30   0
  -1 -12  -8   22.00    5.83   0
  -1 -12  -8   23.86    7.00   0
   1 -12   8   25.18    9.77   0
  -1  12  -8   17.58    9.01   0
   1  12   8   32.33   13.12   0
   2 -12   8   73.20   16.54   0
   2 -12   8   85.27   13.15   0
   2  12   8   80.90   14.45   0
  -2  12  -8   95.61   12.95   0
   3 -12   8  113.41   16.09   0
   3 -12   8   71.98   18.71   0
   3  12   8  159.32   20.11   0
  -3  12  -8  151.68   20.17   0
   4 -12   8    2.43   14.37   0
   4 -12   8  -51.94   19.23   0
  -4  12  -8   15.18   14.82   0
   4  12   8  -15.59   13.78   0
   5 -13  -8   62.84   20.52   0
   5 -13  -8   37.28   17.13   0
  -5  13   8   32.12   20.91   0
   5  13  -8   25.93   12.20   0
   4 -13  -8  113.61   18.50   0
   4 -13  -8   97.62   18.91   0
   4  13  -8   79.58   12.83   0
  -4  13   8   85.06   19.54   0
  -3 -13   8   -1.39    8.41   0
   3 -13  -8   -4.36   14.89   0
  -3 -13   8   13.78    8.59   0
   3 -13  -8   10.06   13.93   0
   3  13  -8  -10.38    9.16   0
  -3  13   8    4.30   14.69   0
   2 -13  -8  -20.35   11.40   0
  -2 -13   8   31.34   10.39   0
   2 -13  -8   -3.63   10.76   0
  -2 -13   8   10.13    8.66   0
  -2  13   8   22.33   14.51   0
   2  13  -8   10.55    8.96   0
   1 -13  -8   20.57    9.13   0
  -1 -13   8   20.98   11.63   0
   1 -13  -8   38.36   11.49   0
  -1 -13   8   25.49    9.32   0
   1  13  -8   27.84    9.55   0
  -1  13   8   -2.05   11.97   0
   0 -13  -8  150.34   15.12   0
   0 -13   8  149.35   18.26   0
   0 -13  -8  147.95   15.76   0
   0 -13   8  174.65   17.79   0
   0  13   8  167.73   22.05   0
   0  13  -8  132.92   17.31   0
  -1 -13  -8   30.79    7.77   0
   1 -13   8   13.67   11.10   0
   1 -13   8   36.28   14.97   0
  -1 -13  -8   23.43    6.18   0
  -1  13  -8   29.11   10.80   0
   1  13   8   38.19   13.54   0
   2 -13   8   13.22   12.70   0
   2 -13   8    4.25   15.46   0
   2  13   8  -14.82   12.49   0
  -2  13  -8   19.24   12.68   0
   3 -13   8   18.56   13.90   0
   3 -13   8   23.92   19.83   0
   3  13   8   30.73   15.40   0
  -3  13  -8   54.73   15.11   0
   4 -14  -8  -36.05   16.78   0
   4 -14  -8    7.47   20.07   0
  -4  14   8   -1.47   19.63   0
   4  14  -8    2.93   12.14   0
   3 -14  -8   48.74   15.52   0
  -3 -14   8   54.92   10.28   0
   3 -14  -8   36.06   17.61   0
  -3 -14   8   54.27    9.98   0
  -3  14   8   -3.62   16.84   0
   3  14  -8   27.73   11.64   0
   2 -14  -8  114.78   16.11   0
  -2 -14   8  143.40   16.26   0
   2 -14  -8  117.98   18.48   0
  -2 -14   8  113.11   15.16   0
   2  14  -8  123.77   17.06   0
  -2  14   8  132.84   21.07   0
  -1 -14   8   22.51   12.71   0
  -1 -14   8    0.26    9.98   0
   1 -14  -8    6.13    9.61   0
   1 -14  -8    2.56   11.59   0
  -1  14   8   24.20   15.27   0
   1  14  -8   -1.57   10.47   0
   0 -14   8   11.43   14.36   0
   0 -14   8   23.29   11.21   0
   0 -14  -8   21.45    8.13   0
   0 -14  -8   10.36    9.61   0
   0  14   8   11.03   14.39   0
   0  14  -8   10.34   10.88   0
   1 -14   8   58.30   17.27   0
   1 -14   8   56.78   13.40   0
  -1 -14  -8   53.83    7.56   0
  -1 -14  -8   41.77    9.08   0
  -1  14  -8   73.62   13.77   0
   1  14   8   50.53   15.45   0
   2 -14   8   77.61   15.82   0
   2 -14   8   62.02   20.01   0
  -2  14  -8   41.12   15.27   0
   2  14   8   69.69   17.48   0
   3 -14   8   -8.47   19.89   0
   3 -14   8   42.54   17.25   0
   3  14   8   17.95   17.09   0
  -3  14  -8   10.57   16.45   0
   3 -15  -8   -3.12   18.41   0
  -3 -15   8   12.32    9.31   0
  -3 -15   8   -1.91    9.36   0
   3 -15  -8  -33.87   15.47   0
  -3  15   8  -18.30   18.32   0
   3  15  -8   20.99   12.68   0
  -2 -15   8    0.78   11.06   0
   2 -15  -8    4.09   13.10   0
  -2 -15   8   11.32   12.83   0
   2 -15  -8   16.79   17.14   0
  -2  15   8   -4.11   19.10   0
   2  15  -8   20.46   12.44   0
   1 -15  -8   38.76   11.01   0
  -1 -15   8   32.83   15.07   0
  -1 -15   8    7.40   11.68   0
   1 -15  -8   18.69   13.82   0
   1  15  -8   16.06   12.06   0
  -1  15   8   37.33   18.90   0
   0 -15   8   79.67   18.19   0
   0 -15   8   86.30   13.95   0
   0 -15  -8   66.09   11.93   0
   0 -15  -8   76.66   10.36   0
   0  15  -8   43.09   14.24   0
   0  15   8   15.14   17.34   0
   1 -15   8   12.25   18.63   0
  -1 -15  -8   21.30    6.36   0
  -1 -15  -8   11.23    8.47   0
   1 -15   8   32.23   14.31   0
  -1  15  -8   -7.58   13.36   0
   1  15   8   -5.07   16.29   0
   2 -15   8   30.26   16.45   0
   2 -15   8   51.95   21.99   0
  -2  15  -8   66.02   16.63   0
   2  15   8   24.56   17.87   0
  -1 -16   8   21.52   17.34   0
   1 -16  -8  -11.14   14.68   0
  -1  16   8    6.76   19.63   0
   0 -16   8   -1.00   19.04   0
   0  16   8   34.35   20.62   0
   8   0  -9   25.24   18.89   0
   7   0  -9   13.44   13.47   0
   6   0  -9    4.97   10.02   0
  -6   0   9   -6.76    6.84   0
  -5   0   9    5.08    7.17   0
   5   0  -9    0.37    8.08   0
  -4   0   9    1.91    6.37   0
   4   0  -9    2.04    7.03   0
  -3   0   9    2.85    6.27   0
   3   0  -9    0.28    5.74   0
   2   0  -9    3.09    5.18   0
  -2   0   9    0.48    5.59   0
  -1   0   9   -0.67    5.14   0
   1   0  -9   -5.60    4.48   0
   0   0  -9   -6.78    3.87   0
   0   0   9   -3.55    4.87   0
   1   0   9   -6.88    5.79   0
  -1   0  -9   -6.83    3.63   0
   2   0   9    6.61    6.51   0
  -2   0  -9    0.96    3.98   0
  -3   0  -9   -0.81    4.09   0
   3   0   9    5.52    7.14   0
  -4   0  -9   -4.03    4.79   0
   4   0   9    2.39    8.02   0
   5   0   9    0.38    9.53   0
   6   0   9    6.51   13.18   0
   8  -1  -9   24.09   19.07   0
   8   1  -9    2.05   17.51   0
   7  -1  -9   55.27   14.93   0
  -7   1   9   42.53    9.03   0
   7   1  -9   65.36   14.46   0
  -6  -1   9   13.30    6.51   0
   6  -1  -9    5.70   10.68   0
  -6   1   9   12.86    7.66   0
   6   1  -9   27.67   10.46   0
  -5  -1   9   52.81    8.50   0
   5  -1  -9   46.29   10.21   0
  -5   1   9   59.52    9.30   0
   5   1  -9   62.51   10.04   0
   4  -1  -9   23.27    8.05   0
  -4  -1   9   31.45    7.48   0
   4   1  -9   21.03    7.57   0
  -4   1   9   31.53    7.97   0
   3  -1  -9    6.96    6.57   0
  -3  -1   9   -1.01    6.00   0
  -3   1   9    3.50    6.57   0
   3   1  -9   -3.89    5.64   0
  -2  -1   9   25.25    6.55   0
   2  -1  -9   20.64    6.45   0
   2   1  -9   36.65    6.33   0
  -2   1   9   24.13    6.70   0
   1  -1  -9   12.60    5.37   0
  -1  -1   9   -1.89    5.24   0
   1   1  -9    7.62    4.49   0
  -1   1   9    8.41    5.74   0
   0  -1  -9    6.73    4.44   0
   0  -1   9    0.55    5.22   0
   0   1   9    5.32    5.31   0
   0   1  -9   -3.29    4.18   0
  -1  -1  -9    7.44    4.10   0
   1  -1   9    3.04    5.54   0
  -1   1  -9    9.14    4.21   0
   1   1   9    4.39    5.87   0
  -2  -1  -9   -2.77    4.05   0
   2  -1   9   -1.30    6.34   0
   2   1   9    5.83    6.32   0
  -2   1  -9    4.94    4.17   0
   3  -1   9    0.35    6.89   0
  -3  -1  -9   -0.49    3.87   0
   3   1   9    9.28    6.92   0
  -3   1  -9    0.06    4.45   0
   4  -1   9   10.60    8.50   0
  -4  -1  -9   21.47    4.68   0
   4   1   9   17.90    9.14   0
  -4   1  -9   21.30    5.97   0
   5  -1   9   33.60   10.43   0
   5   1   9   11.25   10.28   0
   6  -1   9   18.49   12.50   0
   6   1   9   -6.34   12.91   0
   8  -2  -9   -7.42   19.77   0
   8   2  -9   -6.05   16.24   0
   7  -2  -9   41.38   15.03   0
  -7   2   9   38.71    9.94   0
   7   2  -9   32.53   13.03   0
   6  -2  -9    6.30   11.39   0
  -6  -2   9   -1.51    5.66   0
  -6   2   9   -4.34    7.95   0
   6   2  -9    5.85    9.44   0
   5  -2  -9   44.68   10.55   0
  -5  -2   9   55.88    8.21   0
  -5   2   9   62.26   10.23   0
   5   2  -9   50.80    9.52   0
  -4  -2   9   27.10    7.09   0
   4  -2  -9   20.91    8.21   0
   4   2  -9   27.93    7.62   0
  -4   2   9   20.65    8.34   0
   3  -2  -9   67.92    9.33   0
  -3  -2   9   81.91   10.32   0
  -3   2   9   52.79    9.54   0
   3   2  -9   70.33    9.46   0
  -2  -2   9   -3.45    5.15   0
   2  -2  -9   -0.24    5.37   0
   2   2  -9    4.89    5.02   0
  -2   2   9    4.59    5.89   0
  -1  -2   9   69.90    8.45   0
   1  -2  -9   70.51    8.75   0
   1   2  -9   63.82    8.03   0
  -1   2   9   62.61    8.66   0
   0  -2  -9   60.36    7.81   0
   0  -2   9   52.35    7.80   0
   0   2  -9   68.10    7.63   0
   0   2   9   53.02    8.08   0
   1  -2   9   55.33    8.08   0
  -1  -2  -9   57.26    7.26   0
   1   2   9   52.77    8.15   0
  -1   2  -9   60.85    7.27   0
  -2  -2  -9   22.04    4.60   0
   2  -2   9   29.80    6.97   0
   2   2   9   34.50    7.34   0
  -2   2  -9   21.34    5.00   0
  -3  -2  -9   34.94    4.91   0
   3  -2   9   31.90    8.23   0
  -3   2  -9   36.25    6.18   0
   3   2   9   33.83    8.31   0
  -4  -2  -9  127.74    9.53   0
   4  -2   9  148.79   15.34   0
  -4   2  -9  134.48   12.46   0
   4   2   9  123.49   14.97   0
   5  -2   9   19.62   10.51   0
   5   2   9   12.33   10.10   0
   6  -2   9  -14.32   13.13   0
   6   2   9   18.31   13.39   0
   8  -3  -9   -8.65   20.83   0
   8   3  -9   47.27   16.84   0
   7  -3  -9   41.55   16.00   0
   7   3  -9   34.72   12.61   0
  -7   3   9   29.76   10.87   0
   6  -3  -9   -1.44   11.82   0
  -6  -3   9   14.62    4.87   0
  -6   3   9    1.84    8.74   0
   6   3  -9   -3.75    9.06   0
  -5  -3   9   -3.04    5.88   0
   5  -3  -9   -9.89    9.12   0
  -5   3   9   -4.58    7.53   0
   5   3  -9  -11.32    7.14   0
   4  -3  -9    6.54    8.05   0
  -4  -3   9    3.61    6.11   0
  -4   3   9    5.41    7.32   0
   4   3  -9   -2.86    6.48   0
   3  -3  -9  -14.16    6.08   0
  -3  -3   9    4.59    5.65   0
  -3   3   9    0.46    6.85   0
   3   3  -9    7.69    5.80   0
   2  -3  -9   52.36    8.07   0
  -2  -3   9   44.74    7.56   0
  -2   3   9   55.87    8.63   0
   2   3  -9   53.22    7.40   0
  -1  -3   9   40.40    7.05   0
   1  -3  -9   32.15    6.45   0
   1   3  -9   36.17    5.98   0
  -1   3   9   29.78    7.14   0
   0  -3   9   -0.29    5.18   0
   0  -3  -9   -1.02    4.80   0
   0   3   9   13.21    6.26   0
   0   3  -9    3.96    4.07   0
   1  -3   9  311.89   21.49   0
  -1  -3  -9  271.37   20.01   0
  -1   3  -9  303.35   20.24   0
   1   3   9  310.82   21.61   0
   2  -3   9   27.05    7.06   0
  -2  -3  -9   23.32    4.77   0
  -2   3  -9   25.89    5.27   0
   2   3   9   18.57    7.18   0
  -3  -3  -9  158.27   10.56   0
   3  -3   9  121.03   14.42   0
  -3   3  -9  153.41   12.39   0
   3   3   9  102.76   14.03   0
   4  -3   9   59.43   10.62   0
   4   3   9   58.39   10.26   0
  -4   3  -9   80.10    9.11   0
   5  -3   9    8.29   10.22   0
   5   3   9   21.23   11.03   0
   6  -3   9  138.48   17.49   0
   6   3   9  104.17   16.61   0
   8  -4  -9  -19.97   20.90   0
   7  -4  -9  -14.43   15.43   0
   7   4  -9   -1.80   12.10   0
  -7   4   9   -8.71   11.13   0
   6  -4  -9   -9.56   12.28   0
  -6   4   9  -19.01    8.68   0
   6   4  -9    1.49    9.03   0
  -5  -4   9   27.41    6.64   0
   5  -4  -9   22.46   10.51   0
  -5   4   9   27.07    9.96   0
   5   4  -9   35.46    8.52   0
   4  -4  -9   87.60   11.97   0
  -4  -4   9   89.01   10.00   0
   4   4  -9   79.13   10.02   0
  -4   4   9   80.22   11.63   0
   3  -4  -9   23.19    7.71   0
  -3  -4   9   22.12    6.53   0
   3   4  -9   25.15    6.78   0
  -3   4   9   24.37    8.32   0
  -2  -4   9    1.62    5.47   0
   2  -4  -9   11.50    6.66   0
  -2   4   9    1.40    6.43   0
   2   4  -9    9.74    4.98   0
   1  -4  -9  118.06   11.73   0
  -1  -4   9  123.22   12.00   0
  -1   4   9  120.29   12.69   0
   1   4  -9  127.29   10.84   0
   0  -4  -9   16.36    5.30   0
   0  -4   9   11.94    5.93   0
   0   4  -9   10.88    4.82   0
   0   4   9   26.90    7.02   0
  -1  -4  -9  641.45   38.41   0
   1  -4   9  603.24   39.21   0
   1   4   9  594.77   39.36   0
  -1   4  -9  575.84   38.31   0
   2  -4   9   37.41    8.15   0
  -2  -4  -9   51.15    6.09   0
  -2   4  -9   55.88    6.83   0
   2   4   9   61.27    8.80   0
  -3  -4  -9  120.85    9.32   0
   3  -4   9  121.40   13.83   0
  -3   4  -9  121.92   11.77   0
   3   4   9  151.26   14.43   0
   4  -4   9   12.14    9.11   0
   4   4   9   -1.51    8.36   0
  -4   4  -9   10.35    7.14   0
   5  -4   9   12.63   10.76   0
   5   4   9   14.11   11.40   0
  -5   4  -9   27.03    9.32   0
   6  -4   9   25.97   14.30   0
   6   4   9   41.93   14.60   0
   7  -5  -9   34.36   17.14   0
   7   5  -9   20.50   12.12   0
  -7   5   9    5.19   12.27   0
   6  -5  -9   62.44   15.21   0
   6   5  -9   88.23   12.17   0
  -6   5   9   86.18   13.22   0
   5  -5  -9    4.05   10.24   0
  -5  -5   9    8.86    5.46   0
  -5   5   9   -0.54    8.87   0
   5   5  -9    0.43    7.52   0
  -4  -5   9   94.51   10.77   0
   4  -5  -9   82.44   12.01   0
  -4   5   9   60.74   11.89   0
   4   5  -9   85.77   11.37   0
  -3  -5   9  203.13   16.48   0
   3  -5  -9  206.61   18.00   0
  -3   5   9  188.88   18.35   0
   3   5  -9  217.46   16.28   0
  -2  -5   9  330.56   23.44   0
   2  -5  -9  351.03   24.26   0
   2   5  -9  330.53   22.81   0
  -2   5   9  314.95   24.47   0
  -1  -5   9   24.22    6.67   0
   1  -5  -9   25.01    6.80   0
   1   5  -9   16.74    5.46   0
  -1   5   9   40.26    8.03   0
   0  -5  -9   92.44   10.05   0
   0  -5   9   91.29   10.50   0
   0   5  -9   86.91    9.20   0
   0   5   9   97.63   11.53   0
  -1  -5  -9  342.14   23.01   0
   1  -5   9  322.01   24.01   0
  -1   5  -9  354.42   23.19   0
   1   5   9  351.65   24.44   0
   2  -5   9   84.28   10.15   0
  -2  -5  -9   79.80    7.90   0
  -2   5  -9   68.60    9.21   0
   2   5   9   83.30   10.60   0
  -3  -5  -9    3.12    2.94   0
   3  -5   9    1.52    7.59   0
   3   5   9   -5.66    8.07   0
  -3   5  -9    3.35    6.00   0
   4  -5   9   26.90   10.18   0
  -4   5  -9   12.47    7.72   0
   4   5   9   22.32   10.12   0
   5  -5   9   11.06   11.27   0
   5   5   9   11.47   11.76   0
  -5   5  -9   -6.81    9.95   0
   6  -5   9  -20.83   14.03   0
   6   5   9   13.14   14.74   0
   7  -6  -9    9.66   17.54   0
  -7   6   9  -13.02   12.84   0
   7   6  -9   -3.32   12.05   0
   6  -6  -9   -1.75   13.55   0
   6   6  -9   23.42    9.90   0
  -6   6   9   11.19   11.49   0
  -5  -6   9   45.73    6.09   0
   5  -6  -9   29.83   11.76   0
  -5   6   9   34.09   11.41   0
   5   6  -9   50.12    9.23   0
   4  -6  -9    1.06    9.45   0
  -4  -6   9    2.93    6.17   0
   4   6  -9   14.72    6.92   0
  -4   6   9    6.48    9.11   0
   3  -6  -9  174.17   18.98   0
  -3  -6   9  221.87   17.10   0
  -3   6   9  212.61   19.62   0
   3   6  -9  226.40   16.60   0
   2  -6  -9  249.25   20.15   0
  -2  -6   9  243.78   19.25   0
  -2   6   9  261.95   20.88   0
   2   6  -9  262.85   18.60   0
   1  -6  -9  534.10   35.42   0
  -1  -6   9  529.13   35.15   0
   1   6  -9  562.37   34.72   0
  -1   6   9  510.77   36.11   0
   0  -6  -9  379.32   25.12   0
   0  -6   9  374.02   25.45   0
   0   6  -9  370.20   24.67   0
   0   6   9  342.50   26.19   0
  -1  -6  -9    7.93    5.14   0
   1  -6   9   18.90    7.00   0
  -1   6  -9   19.23    5.49   0
   1   6   9    5.92    7.33   0
   2  -6   9   46.47    8.49   0
  -2  -6  -9   50.92    7.10   0
   2   6   9   58.08    9.75   0
  -2   6  -9   52.25    7.46   0
   3  -6   9   -0.65    8.49   0
   3   6   9    5.62    8.20   0
  -3   6  -9    0.76    6.53   0
   4  -6   9   72.61   12.80   0
  -4   6  -9   97.49   13.56   0
   4   6   9   98.72   13.00   0
   5  -6   9   29.14   12.54   0
   5   6   9   36.57   13.01   0
  -5   6  -9   28.15   11.61   0
   6  -6   9   -8.44   15.40   0
   6   6   9    5.23   15.76   0
   7  -7  -9   48.07   19.69   0
   7   7  -9   52.93   14.33   0
  -7   7   9   56.49   16.44   0
   6  -7  -9   22.66   14.42   0
  -6   7   9   36.12   14.38   0
   6   7  -9   19.04   10.30   0
   5  -7  -9    1.02   11.39   0
  -5  -7   9    6.55    3.40   0
  -5   7   9   12.34   11.29   0
   5   7  -9    3.47    7.88   0
   4  -7  -9   94.11   14.11   0
  -4  -7   9   87.30   11.31   0
  -4   7   9   80.06   13.91   0
   4   7  -9   86.48   11.34   0
   3  -7  -9   19.81    9.55   0
  -3  -7   9   22.00    7.38   0
   3   7  -9   39.66    6.81   0
  -3   7   9   15.75   10.22   0
   2  -7  -9   41.92    9.03   0
  -2  -7   9   24.63    7.00   0
   2   7  -9   28.56    6.38   0
  -2   7   9   13.76    8.96   0
  -1  -7   9  376.93   26.07   0
   1  -7  -9  371.68   26.29   0
   1   7  -9  368.07   25.17   0
  -1   7   9  377.49   27.41   0
   0  -7  -9  206.15   16.47   0
   0  -7   9  222.62   17.33   0
   0   7   9  196.15   18.01   0
   0   7  -9  221.03   16.02   0
  -1  -7  -9   -0.13    5.11   0
   1  -7   9    2.59    6.96   0
  -1   7  -9   -4.11    5.11   0
   1   7   9    3.12    8.17   0
   2  -7   9  314.86   23.70   0
  -2  -7  -9  312.01   21.04   0
  -2   7  -9  330.52   22.63   0
   2   7   9  317.62   24.04   0
   3  -7   9   88.95   12.12   0
  -3   7  -9   86.82   10.79   0
   3   7   9  102.20   12.74   0
   4  -7   9   23.67   10.97   0
   4   7   9   22.23   11.03   0
  -4   7  -9   32.68    9.60   0
   5  -7   9    1.00   12.78   0
   5   7   9  -12.45   11.85   0
  -5   7  -9  -23.42   12.17   0
   7  -8  -9   34.27   21.00   0
   7   8  -9   11.68   13.58   0
  -7   8   9   -4.26   16.68   0
   6  -8  -9   11.18   16.12   0
   6   8  -9   16.70   10.19   0
  -6   8   9    3.41   14.44   0
   5  -8  -9   45.29   14.34   0
   5   8  -9   26.63    8.56   0
  -5   8   9    7.09   12.73   0
  -4  -8   9   75.18    9.22   0
   4  -8  -9   70.69   13.91   0
  -4   8   9   56.08   13.21   0
   4   8  -9   66.67    9.31   0
  -3  -8   9    5.50    6.78   0
   3  -8  -9   -3.50    9.30   0
  -3   8   9   -6.24   10.00   0
   3   8  -9    1.62    5.81   0
  -2  -8   9    4.97    6.57   0
   2  -8  -9   17.40    8.51   0
  -2   8   9   20.18    9.61   0
   2   8  -9   -0.88    5.32   0
  -1  -8   9   34.06    7.83   0
   1  -8  -9   30.58    8.25   0
  -1   8   9   30.53    9.88   0
   1   8  -9   24.89    6.20   0
   0  -8   9   63.53    9.32   0
   0  -8  -9   69.28    9.68   0
   0   8  -9   55.34    7.70   0
   0   8   9   50.53   10.77   0
   1  -8   9   31.94    8.23   0
  -1  -8  -9   17.16    5.72   0
   1   8   9   40.78    9.95   0
  -1   8  -9   29.90    7.00   0
   2  -8   9   79.96   10.92   0
  -2  -8  -9   74.73    7.95   0
  -2  -8  -9   62.58    8.07   0
  -2   8  -9   77.54    9.79   0
   2   8   9   99.18   12.34   0
   3  -8   9   27.69    9.64   0
  -3   8  -9   23.06    8.40   0
   3   8   9    8.26   10.19   0
   4  -8   9  122.13   15.46   0
  -4   8  -9  126.27   17.30   0
   4   8   9  137.98   16.16   0
   5  -8   9   29.33   14.74   0
   5   8   9   61.92   15.08   0
  -5   8  -9    6.15   14.33   0
   6  -9  -9   23.16   17.35   0
  -6   9   9   51.94   16.30   0
   6   9  -9   52.41   11.60   0
   5  -9  -9   30.12   14.40   0
  -5   9   9   -8.52   13.91   0
   5   9  -9   -0.45    8.42   0
   4  -9  -9  -11.99   11.47   0
  -4  -9   9    0.69    6.30   0
  -4  -9   9   -4.85    6.54   0
  -4   9   9   -8.37   11.79   0
   4   9  -9    0.42    6.82   0
  -3  -9   9   28.31    7.94   0
   3  -9  -9   28.25   11.38   0
  -3   9   9   19.60   11.10   0
   3   9  -9   12.24    6.94   0
  -2  -9   9   90.92   10.76   0
   2  -9  -9   64.86   11.76   0
  -2   9   9   68.36   13.24   0
   2   9  -9   78.64   10.25   0
   1  -9  -9    9.23    8.02   0
  -1  -9   9    4.25    7.33   0
   1   9  -9   -2.17    5.78   0
  -1   9   9    0.41    9.29   0
   0  -9   9   23.11    8.03   0
   0  -9  -9   45.62    8.18   0
   0   9   9   45.92   10.80   0
   0   9  -9   50.89    7.75   0
  -1  -9  -9    1.58    5.62   0
   1  -9   9   -0.82    7.28   0
  -1  -9  -9   -0.71    5.64   0
   1   9   9  -14.18    8.81   0
  -1   9  -9   -0.15    6.48   0
   2  -9   9  145.85   15.20   0
  -2  -9  -9  130.73   10.04   0
  -2  -9  -9  112.85   10.27   0
  -2   9  -9  125.72   14.32   0
   2   9   9  113.41   16.32   0
   3  -9   9   -1.51   10.05   0
   3   9   9    6.31   10.35   0
  -3   9  -9   21.67    9.17   0
   4  -9   9   25.84   11.91   0
  -4   9  -9   -0.91   11.25   0
   4   9   9   13.23   11.71   0
   5  -9   9   -2.22   14.96   0
  -5   9  -9  -15.09   15.51   0
   5   9   9   15.05   15.62   0
   6 -10  -9    5.74   17.80   0
   6  10  -9   -0.43   11.26   0
  -6  10   9    7.19   18.18   0
   5 -10  -9   36.48   16.23   0
   5  10  -9   15.60    9.24   0
  -5  10   9   22.35   15.27   0
  -4 -10   9   18.21    7.05   0
   4 -10  -9   26.20   13.81   0
  -4 -10   9   10.10    6.58   0
   4  10  -9   13.80    8.00   0
  -4  10   9   16.48   14.46   0
   3 -10  -9    2.18   11.50   0
  -3 -10   9   -2.07    7.94   0
  -3 -10   9   -0.87    7.65   0
   3  10  -9   15.16    7.43   0
  -3  10   9   -9.27   10.89   0
  -2 -10   9    9.54    7.24   0
   2 -10  -9    4.14    9.89   0
   2  10  -9   -6.40    6.46   0
  -2  10   9  -14.88   10.20   0
  -1 -10   9    7.69    7.67   0
   1 -10  -9   17.24    9.04   0
   1  10  -9    7.09    6.65   0
  -1  10   9   -3.23    9.78   0
   0 -10  -9   -3.76    7.12   0
   0 -10  -9    8.17    7.02   0
   0 -10   9  -13.37    7.62   0
   0  10  -9   -4.63    6.45   0
   0  10   9   -6.87   10.22   0
   1 -10   9   80.90   11.47   0
  -1 -10  -9   74.02    9.78   0
  -1 -10  -9   76.55   10.54   0
  -1  10  -9   69.14    9.80   0
   1  10   9   57.77   12.05   0
  -2 -10  -9   32.40    5.51   0
   2 -10   9   58.62   11.19   0
  -2 -10  -9   39.49    4.96   0
   2  10   9   31.69   12.05   0
  -2  10  -9   55.11    9.94   0
   3 -10   9    3.77   11.53   0
   3  10   9    0.60   11.74   0
  -3  10  -9   26.89   11.05   0
   4 -10   9   29.46   13.21   0
  -4  10  -9   62.71   14.35   0
   4  10   9   33.50   14.16   0
   5  10   9    2.80   16.13   0
   6 -11  -9   12.37   30.58   0
  -6  11   9   28.01   20.48   0
   5 -11  -9    1.72   16.55   0
  -5  11   9   20.73   18.18   0
   5  11  -9   10.92   10.66   0
  -4 -11   9    4.96    6.30   0
   4 -11  -9    7.54   15.16   0
  -4 -11   9    7.46    6.75   0
   4  11  -9    3.05    8.63   0
  -4  11   9   17.03   13.70   0
  -3 -11   9   79.70   11.49   0
  -3 -11   9   93.65   11.45   0
   3 -11  -9   56.21   14.18   0
  -3  11   9   92.89   16.22   0
   3  11  -9   65.97   10.07   0
  -2 -11   9    5.33    8.21   0
  -2 -11   9    0.21    9.33   0
   2 -11  -9   13.88   11.49   0
   2  11  -9   -4.19    7.19   0
  -2  11   9    7.35   11.88   0
  -1 -11   9   29.55    8.70   0
   1 -11  -9   18.60    8.57   0
  -1 -11   9    8.02   10.42   0
   1 -11  -9    2.76    9.38   0
  -1  11   9   23.07   12.58   0
   1  11  -9    6.02    7.10   0
   0 -11  -9   30.10    8.82   0
   0 -11   9   30.21    9.40   0
   0 -11  -9   50.02    8.71   0
   0  11  -9   36.57    8.56   0
   0  11   9   53.76   13.41   0
  -1 -11  -9    7.66    6.82   0
   1 -11   9   12.25    9.80   0
  -1 -11  -9    9.26    6.00   0
  -1  11  -9    3.64    7.89   0
   1  11   9  -15.89   10.87   0
  -2 -11  -9    4.46    2.99   0
  -2 -11  -9   -1.20    3.62   0
   2 -11   9  -12.83   10.30   0
   2  11   9   12.84   12.31   0
  -2  11  -9    6.27    9.70   0
   3 -11   9   49.27   13.99   0
   3 -11   9   59.72   18.41   0
   3  11   9   67.97   14.82   0
  -3  11  -9   74.50   14.12   0
   4 -11   9   25.95   14.76   0
   4 -11   9   22.27   20.39   0
  -4  11  -9   29.79   14.51   0
   4  11   9   10.55   15.65   0
   5 -12  -9  115.56   21.18   0
   5 -12  -9  155.94   22.96   0
  -5  12   9  130.14   23.47   0
   5  12  -9   90.20   14.68   0
  -4 -12   9   10.90    5.25   0
   4 -12  -9   17.80   15.97   0
   4 -12  -9   22.72   16.34   0
  -4  12   9   -9.13   16.21   0
   4  12  -9    4.20    9.65   0
  -3 -12   9  -11.50    8.61   0
  -3 -12   9   14.55    9.37   0
   3 -12  -9   30.51   14.57   0
   3 -12  -9    8.64   13.72   0
   3  12  -9    3.44    8.99   0
  -3  12   9   18.42   15.59   0
   2 -12  -9   46.11   14.24   0
   2 -12  -9   57.77   13.09   0
  -2 -12   9   57.42   11.89   0
  -2 -12   9   72.41   10.78   0
   2  12  -9   43.80    9.85   0
  -2  12   9   31.63   14.40   0
  -1 -12   9   33.22   11.52   0
  -1 -12   9   30.26    9.66   0
   1 -12  -9    2.24    9.44   0
   1 -12  -9   44.88   10.18   0
   1  12  -9    6.10    8.88   0
  -1  12   9   -7.76   12.33   0
   0 -12  -9   -3.13    8.51   0
   0 -12   9    8.72    9.51   0
   0 -12   9   14.42   12.90   0
   0 -12  -9    3.37    7.64   0
   0  12   9    1.71   12.44   0
   0  12  -9  -15.66    8.06   0
  -1 -12  -9   65.39    8.18   0
   1 -12   9   61.97   16.12   0
   1 -12   9   82.47   12.94   0
  -1 -12  -9   49.88    8.94   0
  -1  12  -9   58.53   11.34   0
   1  12   9   53.42   14.77   0
   2 -12   9   29.98   12.70   0
   2 -12   9   26.54   16.59   0
   2  12   9   45.04   14.29   0
  -2  12  -9   48.20   11.73   0
   3 -12   9   -8.10   17.55   0
   3 -12   9   22.64   14.09   0
   3  12   9   22.61   14.90   0
  -3  12  -9   16.20   14.35   0
   4  12   9   46.74   18.15   0
   4 -13  -9   23.72   16.82   0
   4 -13  -9   -1.60   18.84   0
  -4  13   9   -8.02   18.82   0
   4  13  -9    3.19   11.48   0
   3 -13  -9   34.80   15.23   0
  -3 -13   9   28.38   10.66   0
   3 -13  -9   11.05   16.07   0
  -3 -13   9   20.44   10.44   0
   3  13  -9   -6.32   10.13   0
  -3  13   9   26.66   16.89   0
  -2 -13   9   22.55   10.00   0
   2 -13  -9   22.76   13.61   0
  -2 -13   9   -1.54   11.33   0
   2 -13  -9   32.82   12.91   0
   2  13  -9   22.38   10.34   0
  -2  13   9   48.92   16.09   0
  -1 -13   9   48.42   14.22   0
  -1 -13   9   36.62   10.79   0
   1 -13  -9   68.61   11.41   0
   1 -13  -9   49.99   12.54   0
   1  13  -9   49.74   10.60   0
  -1  13   9   61.23   17.03   0
   0 -13  -9    2.52    9.36   0
   0 -13   9   11.67   10.73   0
   0 -13   9   25.32   14.25   0
   0 -13  -9    1.10    8.10   0
   0  13  -9    0.02    9.41   0
   0  13   9   -0.12   14.25   0
   1 -13   9   41.66   12.54   0
  -1 -13  -9   41.88    7.62   0
   1 -13   9   16.67   16.31   0
  -1 -13  -9   53.15    8.75   0
   1  13   9   56.15   15.85   0
  -1  13  -9   43.93   11.95   0
   2 -13   9   -3.19   13.53   0
   2 -13   9    4.29   18.05   0
   2  13   9    3.01   15.49   0
  -2  13  -9   37.58   12.71   0
   3 -13   9   37.15   22.04   0
   3 -13   9   57.72   18.12   0
  -3  13  -9   93.39   16.95   0
   3  13   9   68.81   18.45   0
   3 -14  -9    2.89   17.38   0
  -3 -14   9   16.77   10.70   0
   3 -14  -9   11.00   16.04   0
  -3 -14   9    6.25   11.04   0
   3  14  -9   -0.36   11.90   0
  -3  14   9   14.40   18.70   0
   2 -14  -9   41.74   15.81   0
  -2 -14   9  -14.33   10.90   0
   2 -14  -9    0.09   12.77   0
  -2 -14   9   32.35   13.07   0
   2  14  -9   11.25   11.06   0
  -2  14   9   23.58   17.64   0
  -1 -14   9   -3.41   11.51   0
   1 -14  -9   -8.30   12.64   0
  -1 -14   9  -31.61   14.62   0
   1 -14  -9   -3.47   10.66   0
  -1  14   9   14.53   15.53   0
   1  14  -9  -22.33   11.14   0
   0 -14  -9   14.29    9.81   0
   0 -14   9   34.02   16.86   0
   0 -14   9   27.53   12.74   0
   0 -14  -9   -8.09    8.85   0
   0  14   9   23.35   16.15   0
   0  14  -9   -8.11   11.35   0
   1 -14   9   46.95   14.72   0
  -1 -14  -9   28.03    8.82   0
  -1 -14  -9   37.40    7.32   0
   1 -14   9   27.44   18.44   0
  -1  14  -9   24.21   12.90   0
   1  14   9   43.37   16.88   0
   2 -14   9   15.49   21.21   0
   2 -14   9   11.19   16.41   0
   2  14   9   45.13   17.52   0
  -2  14  -9   26.81   15.09   0
   2 -15  -9   19.89   16.74   0
  -2 -15   9   15.20   14.99   0
  -2 -15   9  -13.27   12.28   0
   2 -15  -9   22.08   14.60   0
   2  15  -9   38.90   13.89   0
  -2  15   9   14.46   19.10   0
  -1 -15   9   -8.27   12.92   0
   1 -15  -9    5.56   14.18   0
   1 -15  -9   -5.97   11.48   0
  -1  15   9   21.70   19.57   0
   0 -15   9  -13.56   18.60   0
   0 -15   9   22.68   13.92   0
   0 -15  -9  -19.50    9.65   0
   0 -15  -9   22.45   11.37   0
   0  15   9  -11.88   17.73   0
   0  15  -9   13.25   13.18   0
  -7   0  10    5.01    8.48   0
   7   0 -10    3.81   14.67   0
   6   0 -10  100.04   14.89   0
  -6   0  10  114.56   14.46   0
   5   0 -10   94.61   12.93   0
  -5   0  10  100.51   12.45   0
  -4   0  10   98.88   12.13   0
   4   0 -10   89.75   11.34   0
  -3   0  10    2.93    6.85   0
   3   0 -10   10.36    7.02   0
   2   0 -10  141.00   13.35   0
  -2   0  10  150.76   14.07   0
   1   0 -10  305.58   21.29   0
  -1   0  10  287.21   21.71   0
   0   0  10  230.16   18.30   0
   0   0 -10  233.22   17.22   0
  -1   0 -10   10.63    4.97   0
   1   0  10   12.92    7.19   0
  -2   0 -10  113.44   10.22   0
   2   0  10   93.09   13.70   0
  -3   0 -10  188.71   15.38   0
   3   0  10  264.34   19.76   0
   4   0  10   73.73   12.42   0
  -4   0 -10   77.07    8.80   0
   5   0  10   -0.79   12.00   0
   6   0  10    4.48   14.97   0
  -7  -1  10  184.88   15.29   0
   7  -1 -10  171.83   24.56   0
   7   1 -10  198.29   24.21   0
  -7   1  10  166.35   18.27   0
   6  -1 -10   29.67   12.28   0
  -6  -1  10   29.65    8.35   0
  -6   1  10   26.70    9.77   0
   6   1 -10   10.80   10.83   0
   5  -1 -10   87.85   12.58   0
  -5  -1  10  101.64   12.90   0
  -5   1  10   71.88   11.86   0
   5   1 -10   88.37   12.20   0
   4  -1 -10   66.37   10.45   0
  -4  -1  10   71.74   10.60   0
  -4   1  10   68.44   10.78   0
   4   1 -10   77.67   10.35   0
   3  -1 -10  108.12   12.42   0
  -3  -1  10  113.96   12.57   0
   3   1 -10   83.57   11.95   0
  -3   1  10  109.11   13.29   0
  -2  -1  10  131.80   13.78   0
   2  -1 -10  153.63   13.46   0
   2   1 -10  153.38   13.50   0
  -2   1  10  138.06   14.10   0
  -1  -1  10    5.48    6.25   0
   1  -1 -10   10.48    6.12   0
   1   1 -10    2.10    5.24   0
  -1   1  10   10.26    6.49   0
   0  -1 -10   61.60    7.84   0
   0  -1  10   59.91    9.10   0
   0   1 -10   61.56    8.62   0
   0   1  10   75.48   10.31   0
  -1  -1 -10  297.63   20.82   0
   1  -1  10  276.86   22.55   0
  -1   1 -10  327.30   21.04   0
   1   1  10  311.14   22.73   0
  -2  -1 -10  342.46   22.18   0
   2  -1  10  347.74   24.50   0
  -2   1 -10  326.80   22.36   0
   2   1  10  295.15   24.33   0
  -3  -1 -10   63.89    7.84   0
   3  -1  10   68.75   10.50   0
  -3   1 -10   48.09    7.03   0
   3   1  10   38.70   10.11   0
  -4  -1 -10  136.28   11.68   0
   4  -1  10  144.53   17.20   0
  -4   1 -10  137.60   13.05   0
   4   1  10  124.63   15.19   0
   5  -1  10    0.76   11.55   0
   5   1  10   19.40   12.19   0
   6  -1  10    9.51   16.21   0
   6   1  10   18.28   15.86   0
   7  -2 -10   30.63   16.86   0
  -7   2  10   34.69   11.59   0
   7   2 -10   70.54   15.07   0
  -6  -2  10   -6.69    7.15   0
   6  -2 -10   16.28   12.74   0
  -6   2  10    2.84    9.30   0
   6   2 -10   -0.19   10.69   0
   5  -2 -10   85.22   12.87   0
  -5  -2  10   82.95   10.70   0
  -5   2  10   88.71   12.43   0
   5   2 -10   77.00   11.39   0
   4  -2 -10   76.40   10.88   0
  -4  -2  10   67.97   10.35   0
   4   2 -10   57.68    9.73   0
  -4   2  10   66.06   10.81   0
  -3  -2  10   -2.03    6.93   0
   3  -2 -10    2.01    6.85   0
   3   2 -10   -1.32    6.55   0
  -3   2  10   -4.48    7.27   0
  -2  -2  10   32.54    7.95   0
   2  -2 -10   35.67    7.65   0
   2   2 -10   40.23    7.46   0
  -2   2  10   36.62    8.25   0
  -1  -2  10  153.32   13.92   0
   1  -2 -10  161.48   13.69   0
   1   2 -10  147.41   12.97   0
  -1   2  10  142.10   14.25   0
   0  -2  10  106.34   12.08   0
   0  -2 -10  123.93   11.41   0
   0   2  10  113.91   12.44   0
   0   2 -10  113.04   10.64   0
   1  -2  10    6.56    6.63   0
  -1  -2 -10   -1.51    4.96   0
  -1   2 -10   -2.19    4.76   0
   1   2  10   -8.20    6.99   0
  -2  -2 -10   69.39    8.09   0
   2  -2  10   54.57    9.61   0
   2   2  10   68.83   10.11   0
  -2   2 -10   66.42    8.80   0
   3  -2  10   70.98   11.08   0
  -3  -2 -10   65.54    7.87   0
  -3   2 -10   74.06    9.10   0
   3   2  10   63.36   11.19   0
  -4  -2 -10   88.82    8.44   0
   4  -2  10   96.53   12.82   0
   4   2  10   79.02   13.34   0
  -4   2 -10   90.70   12.00   0
   5  -2  10   10.11   12.91   0
   5   2  10   -5.90   12.46   0
   6  -2  10   15.50   16.36   0
   6   2  10   14.22   14.89   0
   7  -3 -10   11.49   17.01   0
   7   3 -10   15.57   13.56   0
  -7   3  10   27.42   11.70   0
   6  -3 -10   49.59   13.68   0
  -6  -3  10   26.23    7.32   0
   6   3 -10   27.75   10.87   0
  -6   3  10   32.57   10.83   0
  -5  -3  10    1.10    7.00   0
   5  -3 -10    5.21   10.46   0
  -5   3  10   -3.06    9.77   0
   5   3 -10   -2.34    8.63   0
   4  -3 -10    5.28    8.78   0
  -4  -3  10   -1.51    7.29   0
  -4   3  10   -3.25    8.52   0
   4   3 -10   -5.75    7.00   0
   3  -3 -10   89.97   12.60   0
  -3  -3  10   94.35   12.19   0
  -3   3  10   92.05   12.46   0
   3   3 -10   96.54   10.98   0
   2  -3 -10   61.44    9.02   0
  -2  -3  10   68.12    9.50   0
  -2   3  10   56.71    9.70   0
   2   3 -10   63.51    8.50   0
   1  -3 -10   74.46    9.29   0
  -1  -3  10   75.42    9.69   0
  -1   3  10   67.87    9.94   0
   1   3 -10   74.52    8.64   0
   0  -3 -10   58.88    7.85   0
   0  -3  10   55.47    8.66   0
   0   3  10   70.17    9.76   0
   0   3 -10   53.81    7.49   0
  -1  -3 -10  266.23   19.73   0
   1  -3  10  301.87   21.54   0
  -1   3 -10  281.90   19.76   0
   1   3  10  292.39   21.87   0
  -2  -3 -10   12.72    4.89   0
   2  -3  10    3.46    7.91   0
  -2   3 -10    1.17    5.20   0
   2   3  10    4.52    7.95   0
  -3  -3 -10   13.51    4.71   0
   3  -3  10   26.71    9.30   0
  -3   3 -10   18.31    6.19   0
   3   3  10   12.41    9.49   0
   4  -3  10   27.82   10.43   0
  -4   3 -10    4.16    7.59   0
   4   3  10    3.33   10.27   0
   5  -3  10   62.90   13.93   0
   5   3  10   44.18   13.72   0
  -5   3 -10   56.51   10.89   0
   6  -3  10   44.10   16.98   0
   6   3  10   16.97   15.19   0
   7  -4 -10   -5.72   16.63   0
  -7   4  10   28.67   12.74   0
   7   4 -10   35.01   14.32   0
   6  -4 -10   30.54   14.19   0
  -6  -4  10    7.51    5.85   0
  -6   4  10   23.09   11.27   0
   6   4 -10   23.59   10.82   0
  -5  -4  10  223.29   17.44   0
   5  -4 -10  237.00   21.62   0
   5   4 -10  185.57   19.20   0
  -5   4  10  185.62   20.70   0
   4  -4 -10  126.92   16.66   0
  -4  -4  10  136.88   14.37   0
  -4   4  10  142.86   17.10   0
   4   4 -10  124.80   14.07   0
  -3  -4  10    6.62    6.93   0
   3  -4 -10   28.97    8.51   0
   3   4 -10    7.92    6.27   0
  -3   4  10   11.25    8.81   0
   2  -4 -10    9.73    6.93   0
  -2  -4  10    7.75    6.47   0
  -2   4  10   -9.05    7.46   0
   2   4 -10    4.21    5.38   0
   1  -4 -10  648.42   39.71   0
  -1  -4  10  589.75   39.78   0
  -1   4  10  583.37   40.29   0
   1   4 -10  606.83   39.11   0
   0  -4 -10   52.69    8.23   0
   0  -4  10   72.98    9.58   0
   0   4  10   70.85    9.95   0
   0   4 -10   65.38    8.59   0
  -1  -4 -10  179.56   14.08   0
   1  -4  10  163.25   15.88   0
   1   4  10  157.68   15.95   0
  -1   4 -10  195.16   14.07   0
   2  -4  10   68.47   10.29   0
  -2  -4 -10   76.18    8.43   0
  -2   4 -10   68.25    9.03   0
   2   4  10   60.52   10.73   0
  -3  -4 -10    8.18    4.26   0
   3  -4  10   -7.82    8.61   0
   3   4  10   20.22    9.95   0
  -3   4 -10   20.10    6.53   0
   4  -4  10   59.63   12.26   0
  -4   4 -10   67.10   10.19   0
   4   4  10   61.95   12.10   0
   5  -4  10   17.77   12.94   0
  -5   4 -10   10.03   10.23   0
   5   4  10   -7.61   12.24   0
   6  -4  10   21.28   16.58   0
   6   4  10    1.59   16.67   0
   7  -5 -10    1.87   18.50   0
  -7   5  10    2.12   13.39   0
   7   5 -10    4.87   13.52   0
   6  -5 -10   -8.29   13.97   0
  -6   5  10   10.31   11.79   0
   6   5 -10   -5.41   10.81   0
   5  -5 -10   89.79   14.52   0
  -5  -5  10   97.47   12.10   0
   5   5 -10   88.92   11.93   0
  -5   5  10   75.66   13.41   0
  -4  -5  10   88.21   10.65   0
   4  -5 -10   64.07   12.32   0
   4   5 -10   82.35   10.79   0
  -4   5  10   68.86   12.41   0
   3  -5 -10  638.15   42.13   0
  -3  -5  10  647.69   41.30   0
  -3   5  10  606.29   42.53   0
   3   5 -10  614.13   40.75   0
  -2  -5  10  335.85   24.38   0
   2  -5 -10  320.58   24.72   0
   2   5 -10  341.55   23.63   0
  -2   5  10  343.89   25.93   0
   1  -5 -10  515.28   32.47   0
  -1  -5  10  462.94   32.45   0
  -1   5  10  465.68   33.16   0
   1   5 -10  476.70   31.66   0
   0  -5  10   88.05   11.77   0
   0  -5 -10   97.52   10.53   0
   0   5  10   81.56   11.60   0
   0   5 -10   89.44    9.83   0
   1  -5  10   38.16    8.32   0
  -1  -5 -10   34.68    6.65   0
  -1   5 -10   26.56    6.15   0
   1   5  10   37.64    9.31   0
  -2  -5 -10   24.68    5.63   0
   2  -5  10   20.07    8.69   0
  -2   5 -10   27.09    6.48   0
   2   5  10   45.56   10.03   0
  -3  -5 -10    2.21    3.66   0
   3  -5  10   -1.38    9.10   0
   3   5  10   -4.43    9.54   0
  -3   5 -10   -5.62    6.74   0
   4  -5  10   13.62   10.99   0
  -4   5 -10   34.75    9.57   0
   4   5  10   16.04   10.95   0
   5  -5  10   17.64   13.63   0
  -5   5 -10    1.46   11.37   0
   5   5  10   13.03   13.21   0
   7  -6 -10    9.55   19.02   0
  -7   6  10   49.42   15.56   0
   7   6 -10   -2.14   14.17   0
   6  -6 -10  100.68   18.30   0
  -6   6  10   63.42   15.17   0
   6   6 -10  114.17   14.18   0
   5  -6 -10    2.31   12.11   0
  -5  -6  10   32.31    7.42   0
   5   6 -10   20.84    9.21   0
  -5   6  10   29.79   12.35   0
  -4  -6  10   58.93    9.59   0
   4  -6 -10   60.95   12.81   0
  -4   6  10   72.63   13.30   0
   4   6 -10   60.98    9.57   0
  -3  -6  10    7.85    7.18   0
   3  -6 -10    8.14    8.93   0
  -3   6  10    6.77    9.87   0
   3   6 -10   19.90    6.71   0
   2  -6 -10    0.26    7.78   0
  -2  -6  10    1.22    6.81   0
  -2   6  10    3.17    9.06   0
   2   6 -10   -2.89    5.37   0
   1  -6 -10  115.16   12.67   0
  -1  -6  10  103.42   12.95   0
   1   6 -10  130.82   11.70   0
  -1   6  10  116.99   14.95   0
   0  -6 -10  185.29   15.19   0
   0  -6  10  191.49   16.44   0
   0   6  10  164.13   17.23   0
   0   6 -10  196.54   14.78   0
  -1  -6 -10   52.25    7.96   0
   1  -6  10   77.30   10.43   0
  -1   6 -10   74.54    9.62   0
   1   6  10   66.65   11.19   0
   2  -6  10   67.05   10.37   0
  -2  -6 -10   63.10    8.43   0
   2   6  10   62.31   11.51   0
  -2   6 -10   60.09    8.48   0
   3  -6  10   -0.68    9.39   0
  -3  -6 -10   -1.99    3.04   0
   3   6  10   -8.84   10.38   0
  -3   6 -10    3.63    7.60   0
   4  -6  10   35.45   12.31   0
   4   6  10   57.04   13.58   0
  -4   6 -10   60.03   11.34   0
   5  -6  10    7.57   14.65   0
   5   6  10   -1.01   14.52   0
  -5   6 -10   -0.15   12.51   0
   7  -7 -10   46.49   20.81   0
  -7   7  10   29.71   16.62   0
   6  -7 -10   -3.13   15.94   0
   6   7 -10   -9.39   10.86   0
  -6   7  10  -19.66   13.88   0
  -5  -7  10   51.46    7.93   0
   5  -7 -10   22.60   13.86   0
  -5   7  10   47.50   13.59   0
   5   7 -10   52.33   10.32   0
   4  -7 -10   95.49   14.68   0
  -4  -7  10   97.44   13.21   0
  -4   7  10   98.27   15.26   0
   4   7 -10   91.41   11.06   0
  -3  -7  10  207.62   17.53   0
   3  -7 -10  175.94   19.16   0
   3   7 -10  190.41   16.36   0
  -3   7  10  191.27   20.46   0
  -2  -7  10   -3.63    6.88   0
   2  -7 -10    7.60    8.47   0
  -2   7  10    3.46    8.55   0
   2   7 -10   -8.98    5.49   0
   1  -7 -10   49.89    8.76   0
  -1  -7  10   40.48    8.71   0
  -1   7  10   41.51   10.39   0
   1   7 -10   48.48    7.22   0
   0  -7 -10   38.87    7.98   0
   0  -7  10   26.55    8.03   0
   0   7  10   32.65    9.65   0
   0   7 -10   27.12    6.55   0
   1  -7  10   -2.75    7.89   0
  -1  -7 -10   -1.13    5.73   0
   1   7  10   -8.25    8.34   0
  -1   7 -10    8.65    5.93   0
  -2  -7 -10   47.40    6.89   0
   2  -7  10   41.07    9.37   0
   2   7  10   58.95   11.63   0
  -2   7 -10   60.06    8.95   0
   3  -7  10   11.62    9.61   0
  -3   7 -10   -5.46    8.09   0
   3   7  10    7.08   10.65   0
   4  -7  10   -3.00   11.94   0
   4   7  10    6.50   12.70   0
  -4   7 -10   31.73   11.30   0
   5  -7  10    4.95   15.40   0
  -5   7 -10   12.06   14.35   0
   5   7  10  -11.91   14.57   0
   6  -8 -10  -20.61   16.35   0
  -6   8  10    8.46   15.72   0
   6   8 -10   15.03   11.38   0
  -5  -8  10   -1.07    5.42   0
   5  -8 -10    9.30   13.48   0
  -5  -8  10    0.35    5.53   0
   5   8 -10   -7.13    8.84   0
  -5   8  10    3.24   13.40   0
   4  -8 -10   17.31   12.59   0
  -4  -8  10   11.48    8.34   0
  -4   8  10   19.46   12.92   0
   4   8 -10   31.49    8.47   0
   3  -8 -10   53.23   12.03   0
  -3  -8  10   52.34    9.84   0
   3   8 -10   45.71    8.61   0
  -3   8  10   77.01   13.57   0
  -2  -8  10   11.02    7.77   0
   2  -8 -10    5.93    8.80   0
  -2   8  10    7.57    9.94   0
   2   8 -10   -1.80    6.29   0
  -1  -8  10    5.42    7.49   0
   1  -8 -10   -1.92    7.21   0
   1   8 -10   -1.02    5.95   0
  -1   8  10    5.42    9.74   0
   0  -8 -10    8.03    6.80   0
   0  -8  10   15.51    7.56   0
   0   8 -10    6.42    6.55   0
   0   8  10   19.50   10.24   0
  -1  -8 -10   27.49    6.74   0
   1  -8  10   18.43    9.12   0
   1   8  10   39.08   10.77   0
  -1   8 -10   32.08    7.25   0
  -2  -8 -10   27.28    5.65   0
  -2  -8 -10   17.64    5.66   0
   2  -8  10    9.00    9.29   0
  -2   8 -10   28.78    8.34   0
   2   8  10   13.78   11.08   0
   3  -8  10    0.20   10.34   0
   3   8  10    2.07   10.93   0
  -3   8 -10   -4.03    8.70   0
   4  -8  10  -13.40   13.29   0
   4   8  10   21.85   13.90   0
  -4   8 -10   29.86   12.17   0
   5  -8  10    6.76   15.94   0
  -5   8 -10   19.65   15.97   0
   5   8  10   45.56   17.29   0
   6  -9 -10    8.19   18.84   0
  -6   9  10   -3.99   18.18   0
   6   9 -10   10.40   12.45   0
   5  -9 -10    2.16   15.56   0
   5   9 -10   -6.80    9.38   0
  -5   9  10    8.76   14.66   0
  -4  -9  10  -12.95    7.62   0
   4  -9 -10    5.45   13.03   0
  -4  -9  10   23.00    8.23   0
  -4   9  10   -9.86   12.21   0
   4   9 -10   -2.84    7.99   0
  -3  -9  10   40.97    9.57   0
   3  -9 -10   41.85   12.64   0
   3   9 -10   32.00    8.21   0
  -3   9  10   33.01   11.99   0
   2  -9 -10   34.74   10.49   0
  -2  -9  10   25.97    8.88   0
  -2   9  10   31.63   11.93   0
   2   9 -10   24.81    7.68   0
   1  -9 -10   20.76    8.28   0
  -1  -9  10   20.17    8.48   0
  -1   9  10    4.09   10.81   0
   1   9 -10   15.94    6.98   0
   0  -9 -10   13.56    7.17   0
   0  -9  10   14.92    8.30   0
   0   9  10   18.82   10.95   0
   0   9 -10   10.41    6.85   0
  -1  -9 -10   -6.44    6.32   0
   1  -9  10   -6.61    8.88   0
   1   9  10    4.19   10.70   0
  -1   9 -10   -0.58    7.50   0
  -2  -9 -10   -6.96    4.74   0
  -2  -9 -10   -3.34    5.29   0
   2   9  10   21.74   11.82   0
  -2   9 -10    5.33    8.17   0
   3  -9  10   11.31   10.97   0
  -3   9 -10   -0.37   10.33   0
   3   9  10   -6.44   12.74   0
   4  -9  10   10.02   14.17   0
   4   9  10    5.17   14.34   0
  -4   9 -10    9.57   12.65   0
   6 -10 -10   45.97   21.29   0
  -6  10  10   26.31   19.52   0
   5 -10 -10   16.92   16.87   0
   5  10 -10   15.19   10.49   0
  -5  10  10   19.42   17.28   0
  -4 -10  10   23.71    9.22   0
   4 -10 -10   24.80   15.42   0
  -4 -10  10   10.64    8.55   0
   4  10 -10   24.97    9.28   0
  -4  10  10   -9.69   14.36   0
   3 -10 -10    6.88   12.35   0
  -3 -10  10   16.12    9.42   0
  -3 -10  10    0.05    9.45   0
   3  10 -10   19.43    8.26   0
  -3  10  10   -6.61   12.53   0
  -2 -10  10   -1.54    8.52   0
   2 -10 -10   12.96   11.49   0
   2  10 -10   19.99    7.78   0
  -2  10  10    6.29   11.88   0
  -1 -10  10   35.82   10.06   0
   1 -10 -10   50.53    9.73   0
  -1  10  10   38.08   12.32   0
   1  10 -10   42.14    8.50   0
   0 -10  10   52.82   10.88   0
   0 -10 -10   63.76    9.81   0
   0  10 -10   52.60    9.11   0
   0  10  10   49.06   13.11   0
  -1 -10 -10   10.38    6.88   0
   1 -10  10   15.92    9.71   0
  -1 -10 -10   -1.92    6.91   0
   1  10  10    8.41   11.38   0
  -1  10 -10    5.85    8.40   0
   2 -10  10    5.23   11.12   0
  -2 -10 -10   11.21    5.09   0
  -2 -10 -10    9.04    4.92   0
  -2  10 -10    7.15    9.44   0
   2  10  10   -9.74   12.78   0
   3 -10  10   91.93   14.74   0
   3  10  10   65.99   15.76   0
  -3  10 -10   46.06   13.28   0
   4 -10  10    9.52   14.48   0
   4  10  10    8.75   16.37   0
  -4  10 -10   -5.53   14.89   0
   5 -11 -10  -31.48   17.67   0
  -5  11  10   -8.16   17.61   0
   5  11 -10    3.94   11.86   0
  -4 -11  10   92.53   10.88   0
  -4 -11  10  123.93   14.43   0
   4 -11 -10   59.93   18.34   0
   4  11 -10   70.74   12.23   0
  -4  11  10  104.05   20.50   0
  -3 -11  10   54.77   11.62   0
  -3 -11  10   65.10   11.49   0
   3 -11 -10   71.69   16.03   0
  -3  11  10   48.83   16.08   0
   3  11 -10   51.91   10.17   0
  -2 -11  10   14.55    9.60   0
   2 -11 -10    6.78   11.82   0
  -2 -11  10   -1.22   10.86   0
   2  11 -10    9.73    8.48   0
  -2  11  10   26.55   12.85   0
   1 -11 -10    0.04    9.49   0
  -1 -11  10   12.04    9.58   0
   1  11 -10    0.11    8.15   0
  -1  11  10   16.94   13.10   0
   0 -11 -10   74.24   10.57   0
   0 -11 -10   55.92   10.25   0
   0 -11  10   57.76   11.47   0
   0  11 -10   64.27   10.43   0
   0  11  10   67.53   14.57   0
  -1 -11 -10   42.75    8.01   0
  -1 -11 -10   49.47    8.73   0
   1 -11  10   44.47   11.62   0
   1  11  10   58.99   14.95   0
  -1  11 -10   46.74   10.33   0
   2 -11  10   40.74   13.07   0
  -2 -11 -10    9.60    3.82   0
  -2 -11 -10    1.82    4.68   0
   2  11  10   15.28   14.34   0
  -2  11 -10   18.62   11.32   0
   3 -11  10   11.88   14.06   0
  -3  11 -10   23.05   14.18   0
   3  11  10   17.77   15.44   0
   4 -12 -10  -17.10   18.65   0
  -4 -12  10   -0.02    8.73   0
  -4 -12  10   -3.42    8.33   0
   4 -12 -10    3.11   18.06   0
   4  12 -10   -5.10   10.72   0
  -4  12  10   19.09   17.98   0
  -3 -12  10   27.31   11.26   0
   3 -12 -10   -5.34   15.75   0
  -3 -12  10    2.03   10.96   0
   3 -12 -10   15.05   16.04   0
   3  12 -10   -3.27    9.92   0
  -3  12  10    2.06   16.15   0
  -2 -12  10   -2.03    9.76   0
  -2 -12  10   14.32   12.11   0
   2 -12 -10   -1.16   12.27   0
   2 -12 -10   -9.55   12.48   0
  -2  12  10    5.53   15.04   0
   2  12 -10  -11.89    9.01   0
   1 -12 -10   75.20   13.30   0
  -1 -12  10   52.40   14.37   0
   1 -12 -10   67.14   12.41   0
  -1 -12  10   62.53   11.93   0
   1  12 -10   43.17   10.95   0
  -1  12  10   58.19   15.96   0
   0 -12 -10   92.75   12.04   0
   0 -12  10   89.12   17.26   0
   0 -12 -10  110.45   13.83   0
   0 -12  10   66.07   13.30   0
   0  12  10   77.10   16.93   0
   0  12 -10   80.45   11.82   0
   1 -12  10  -16.93   16.39   0
   1 -12  10   -0.33   11.45   0
  -1 -12 -10    1.66    7.90   0
  -1 -12 -10  -10.20    7.03   0
  -1  12 -10   -2.70   10.42   0
   1  12  10   11.10   14.45   0
   2 -12  10   68.46   15.61   0
   2 -12  10   81.25   19.85   0
  -2  12 -10   17.31   12.72   0
   2  12  10   32.64   15.91   0
   3 -12  10   44.87   15.48   0
   3 -12  10    3.39   20.58   0
  -3  12 -10   16.22   15.37   0
   3  12  10   28.01   17.93   0
  -4 -13  10   12.02    9.71   0
  -4 -13  10   11.81    9.39   0
  -4  13  10   10.49   24.14   0
  -3 -13  10   86.52   13.71   0
  -3 -13  10   85.87   13.62   0
   3 -13 -10   88.63   19.09   0
   3 -13 -10   59.36   18.58   0
   3  13 -10   57.38   13.19   0
  -3  13  10   78.53   19.90   0
  -2 -13  10    9.53   11.25   0
  -2 -13  10   -3.51   13.43   0
   2 -13 -10    6.02   14.82   0
   2 -13 -10    4.06   13.49   0
  -2  13  10  -15.77   15.42   0
   2  13 -10    8.12   10.86   0
   1 -13 -10    0.79   11.63   0
   1 -13 -10   24.86   12.73   0
  -1 -13  10   -2.23   15.00   0
  -1 -13  10    6.35   11.28   0
   1  13 -10    4.11   10.38   0
  -1  13  10   21.72   17.25   0
   0 -13 -10    3.18    9.58   0
   0 -13 -10   30.62    9.79   0
   0 -13  10    5.69   12.28   0
   0 -13  10    7.99   16.16   0
   0  13  10    2.54   16.54   0
   0  13 -10   -9.18   10.56   0
  -1 -13 -10   54.74    8.93   0
  -1 -13 -10   58.18   10.20   0
   1 -13  10   80.91   15.94   0
   1 -13  10   94.70   19.57   0
  -1  13 -10   48.60   13.19   0
   1  13  10   92.12   18.46   0
   2 -13  10   63.40   21.39   0
   2 -13  10   80.34   17.77   0
  -2  13 -10   59.46   14.68   0
   2  13  10   81.46   19.74   0
   2 -14 -10   52.43   15.90   0
  -2 -14  10   44.97   13.81   0
  -2 -14  10   34.38   15.82   0
   2 -14 -10   58.71   17.60   0
   2  14 -10   56.72   13.82   0
  -2  14  10   51.30   19.77   0
   1 -14 -10  152.64   20.55   0
  -1 -14  10  108.55   16.40   0
  -1 -14  10  130.26   20.34   0
   1 -14 -10  122.53   17.31   0
   1  14 -10  147.16   20.29   0
  -1  14  10  103.04   21.45   0
   0 -14  10   24.94   19.06   0
   0 -14 -10    7.93   11.24   0
   0 -14  10   19.43   14.29   0
   0 -14 -10   -9.35    9.83   0
   0  14 -10    9.44   12.34   0
   0  14  10    4.94   17.98   0
   1 -14  10   10.34   20.21   0
  -1 -14 -10    9.24    9.15   0
   1 -14  10   -1.48   16.14   0
  -1 -14 -10   12.11    7.63   0
  -1  14 -10   25.26   14.02   0
   1  14  10   13.55   18.23   0
  -7   0  11    6.96   10.62   0
   7   0 -11   -0.87   15.90   0
  -5   0  11   -4.03    9.12   0
   5   0 -11   10.55   10.28   0
  -4   0  11    2.06    8.74   0
   4   0 -11   -4.28    8.30   0
   3   0 -11   -4.39    7.33   0
  -3   0  11    7.78    7.72   0
   2   0 -11    4.50    6.85   0
  -2   0  11    0.85    7.64   0
   1   0 -11    4.85    6.11   0
  -1   0  11  -16.27    7.06   0
   0   0 -11  -13.06    5.32   0
   0   0  11    0.45    7.73   0
   1   0  11   -9.56    7.89   0
  -2   0 -11    0.42    5.35   0
   2   0  11  -19.60    8.41   0
   3   0  11  -11.27    9.44   0
  -3   0 -11   -4.74    5.79   0
   4   0  11   -5.33   12.20   0
  -4   0 -11    1.72    7.22   0
   5   0  11   -3.54   14.11   0
  -7  -1  11   -6.29    9.32   0
   7  -1 -11   19.95   17.00   0
   7   1 -11   18.05   15.85   0
  -7   1  11  -12.02   11.65   0
   6  -1 -11   13.20   13.13   0
  -6  -1  11   -9.77    9.02   0
  -6   1  11   -2.20   10.43   0
   6   1 -11   20.13   12.31   0
  -5  -1  11   12.19    8.89   0
   5  -1 -11    5.72   10.96   0
   5   1 -11   -6.73    9.54   0
  -5   1  11    0.06    9.94   0
  -4  -1  11   23.54    9.44   0
   4  -1 -11   36.81    9.89   0
  -4   1  11   26.78    9.75   0
   4   1 -11   26.20    9.33   0
   3  -1 -11   23.34    8.54   0
  -3  -1  11    6.73    8.11   0
   3   1 -11    2.04    7.48   0
  -3   1  11    4.81    8.55   0
  -2  -1  11   16.48    8.23   0
   2  -1 -11   14.14    7.25   0
  -2   1  11    6.76    8.19   0
   2   1 -11   17.73    7.03   0
   1  -1 -11    2.44    6.49   0
  -1  -1  11    1.53    7.71   0
   1   1 -11   -1.33    5.74   0
  -1   1  11   -0.07    7.49   0
   0  -1  11   75.94   10.51   0
   0  -1 -11   51.25    8.11   0
   0   1 -11   57.95    8.01   0
   0   1  11   60.46    9.95   0
  -1  -1 -11    0.99    5.52   0
   1  -1  11   -1.57    8.00   0
  -1   1 -11   -0.33    5.27   0
   1   1  11   -4.81    7.81   0
  -2  -1 -11    3.71    5.42   0
   2  -1  11   12.89    8.78   0
  -2   1 -11    3.04    5.67   0
   2   1  11    1.27    8.79   0
  -3  -1 -11   18.41    6.18   0
   3  -1  11   12.92   10.67   0
  -3   1 -11   26.68    6.76   0
   3   1  11   31.25   11.00   0
   4  -1  11    4.42   11.89   0
  -4  -1 -11   -1.05    6.58   0
   4   1  11  -10.52   12.28   0
  -4   1 -11    4.55    7.74   0
   5  -1  11    2.52   14.76   0
   5   1  11   31.08   14.45   0
   7  -2 -11   -0.67   17.17   0
  -7  -2  11   -2.97    7.16   0
   7   2 -11  -15.06   15.13   0
  -7   2  11    4.42   12.63   0
   6  -2 -11   24.69   13.99   0
  -6  -2  11   16.99    9.54   0
  -6   2  11   33.95   11.69   0
   6   2 -11   32.79   12.44   0
   5  -2 -11   11.06   11.29   0
  -5  -2  11    1.74    9.08   0
  -5   2  11   16.18   10.30   0
   5   2 -11   -2.20    9.87   0
  -4  -2  11   -3.53    8.29   0
   4  -2 -11    1.97    9.51   0
  -4   2  11    8.50    9.21   0
   4   2 -11   -7.05    8.40   0
  -3  -2  11   -2.96    7.46   0
   3  -2 -11   12.95    8.38   0
   3   2 -11  -11.28    7.11   0
  -3   2  11   -9.05    8.25   0
   2  -2 -11    8.03    7.04   0
  -2  -2  11   19.16    7.85   0
  -2   2  11   22.75    8.54   0
   2   2 -11   11.92    7.07   0
   1  -2 -11   42.83    8.02   0
  -1  -2  11   29.67    8.69   0
   1   2 -11   25.47    6.66   0
  -1   2  11   27.78    8.63   0
   0  -2 -11  167.79   14.03   0
   0  -2  11  156.28   15.63   0
   0   2 -11  157.72   13.80   0
   0   2  11  168.76   16.05   0
  -1  -2 -11   40.98    6.78   0
   1  -2  11   26.96    9.02   0
   1   2  11   52.06   10.18   0
  -1   2 -11   39.76    6.82   0
  -2  -2 -11  191.62   15.00   0
   2  -2  11  193.57   18.51   0
   2   2  11  195.74   19.29   0
  -2   2 -11  191.55   15.60   0
  -3  -2 -11   17.53    5.86   0
   3  -2  11   12.20   10.34   0
  -3   2 -11    0.24    6.15   0
   3   2  11    4.49   10.84   0
   4  -2  11    7.54   12.21   0
  -4  -2 -11   -9.84    5.64   0
   4   2  11    0.27   11.50   0
  -4   2 -11   14.22    8.43   0
   5  -2  11   -5.66   14.03   0
   5   2  11   12.23   15.28   0
  -5   2 -11    7.89   10.00   0
   7  -3 -11   56.38   18.75   0
  -7   3  11   64.26   14.85   0
   7   3 -11   35.87   15.80   0
  -6  -3  11   11.95    8.95   0
   6  -3 -11   49.64   15.01   0
   6   3 -11    8.91   12.65   0
  -6   3  11   37.15   12.44   0
   5  -3 -11   33.68   12.53   0
  -5  -3  11   46.87    9.90   0
  -5   3  11   51.20   11.65   0
   5   3 -11   24.33   10.64   0
   4  -3 -11   47.55   11.07   0
  -4  -3  11   47.62   10.62   0
   4   3 -11   48.39   10.09   0
  -4   3  11   49.77   11.47   0
   3  -3 -11    7.02    8.36   0
  -3  -3  11   21.49    8.39   0
   3   3 -11    4.51    7.86   0
  -3   3  11    6.47    8.95   0
   2  -3 -11   12.50    7.53   0
  -2  -3  11    8.97    7.91   0
   2   3 -11    3.55    6.34   0
  -2   3  11    7.73    8.47   0
   1  -3 -11    0.34    6.96   0
  -1  -3  11    0.20    7.20   0
  -1   3  11    8.05    8.21   0
   1   3 -11    6.65    5.98   0
   0  -3  11   99.58   12.87   0
   0  -3 -11  111.79   11.60   0
   0   3  11  115.55   14.28   0
   0   3 -11   79.30   10.53   0
  -1  -3 -11    0.58    5.64   0
   1  -3  11    3.47    8.36   0
   1   3  11   -1.94    8.68   0
  -1   3 -11   13.15    5.65   0
   2  -3  11   19.15    9.46   0
  -2  -3 -11   44.49    6.82   0
   2   3  11   43.79   10.96   0
  -2   3 -11   33.24    7.03   0
   3  -3  11  -13.05   10.00   0
  -3  -3 -11   -3.50    5.24   0
   3   3  11   13.60   11.71   0
  -3   3 -11   11.06    6.73   0
   4  -3  11   35.14   13.22   0
  -4  -3 -11   64.61    6.70   0
  -4   3 -11   75.67   10.60   0
   4   3  11   67.60   13.11   0
   5  -3  11    9.80   15.35   0
   5   3  11   12.29   15.93   0
  -5   3 -11   48.20   11.36   0
   7  -4 -11   29.78   19.37   0
   7   4 -11   20.15   15.65   0
  -7   4  11   54.63   15.54   0
  -6  -4  11  133.08   14.40   0
   6  -4 -11  108.55   18.08   0
  -6   4  11  116.30   17.05   0
   6   4 -11  109.34   15.91   0
   5  -4 -11   47.05   13.11   0
  -5  -4  11   40.76    9.83   0
  -5   4  11   40.67   12.84   0
   5   4 -11   54.94   11.48   0
   4  -4 -11   91.05   13.16   0
  -4  -4  11   91.30   11.74   0
  -4   4  11   89.04   14.07   0
   4   4 -11   65.46   11.18   0
   3  -4 -11   87.72   12.02   0
  -3  -4  11   80.06   11.19   0
   3   4 -11   78.54   10.58   0
  -3   4  11   86.94   13.04   0
  -2  -4  11   81.03   10.52   0
   2  -4 -11   64.93   10.38   0
  -2   4  11   72.59   11.60   0
   2   4 -11   62.54    9.15   0
  -1  -4  11  190.16   16.65   0
   1  -4 -11  171.69   15.66   0
   1   4 -11  166.46   14.59   0
  -1   4  11  164.72   17.32   0
   0  -4  11   51.93    9.33   0
   0  -4 -11   53.36    8.46   0
   0   4 -11   45.90    7.44   0
   0   4  11   46.71   10.30   0
  -1  -4 -11   -0.96    5.69   0
   1  -4  11    8.36    8.50   0
   1   4  11    0.22    8.62   0
  -1   4 -11    4.55    5.90   0
   2  -4  11   62.95   11.22   0
  -2  -4 -11   67.13    9.33   0
   2   4  11   63.58   12.28   0
  -2   4 -11   83.52   10.63   0
  -3  -4 -11   66.30    8.46   0
   3  -4  11   73.36   12.71   0
   3   4  11   77.89   13.65   0
  -3   4 -11   91.79   11.20   0
   4  -4  11    3.85   12.82   0
  -4   4 -11   -6.33    9.55   0
   4   4  11    4.68   12.23   0
   5  -4  11    4.84   15.58   0
   5   4  11    4.57   16.16   0
  -5   4 -11   24.38   12.34   0
   7  -5 -11   40.48   20.26   0
   7   5 -11   36.70   16.46   0
  -7   5  11   65.95   17.13   0
  -6  -5  11   41.27    7.78   0
   6  -5 -11   19.06   16.31   0
   6   5 -11   41.36   13.24   0
  -6   5  11   47.70   14.05   0
   5  -5 -11   69.24   14.62   0
  -5  -5  11  103.13   13.64   0
  -5   5  11   64.09   14.94   0
   5   5 -11   66.58   12.32   0
   4  -5 -11   96.79   14.56   0
  -4  -5  11   99.21   12.51   0
  -4   5  11   79.41   14.26   0
   4   5 -11   92.01   11.90   0
   3  -5 -11  342.53   26.84   0
  -3  -5  11  347.06   25.62   0
  -3   5  11  363.77   27.85   0
   3   5 -11  316.41   24.62   0
   2  -5 -11   84.03   11.49   0
  -2  -5  11   89.24   11.55   0
   2   5 -11   91.46   11.50   0
  -2   5  11   89.01   12.99   0
   1  -5 -11  307.76   22.94   0
  -1  -5  11  278.35   23.43   0
   1   5 -11  330.89   22.32   0
  -1   5  11  309.93   24.43   0
   0  -5  11  106.50   13.55   0
   0  -5 -11  108.53   12.24   0
   0   5 -11   93.58   11.43   0
   0   5  11  113.89   13.58   0
   1  -5  11   48.78   10.02   0
  -1  -5 -11   41.91    7.51   0
  -1   5 -11   42.38    7.82   0
   1   5  11   44.16   10.83   0
  -2  -5 -11  102.45   11.04   0
   2  -5  11  107.43   15.21   0
  -2   5 -11  106.47   12.28   0
   2   5  11  119.04   14.39   0
   3  -5  11   -6.49   10.30   0
  -3  -5 -11    5.79    4.70   0
   3   5  11    8.30   11.63   0
  -3   5 -11   16.24    8.21   0
   4  -5  11   86.23   15.36   0
   4   5  11   86.74   16.43   0
  -4   5 -11  100.49   13.38   0
   5  -5  11   50.45   17.06   0
   5   5  11   47.79   16.31   0
  -5   5 -11   79.11   14.78   0
   6  -6 -11   37.17   16.21   0
  -6   6  11   26.53   15.65   0
   6   6 -11    0.47   12.95   0
   5  -6 -11  362.42   30.52   0
  -5  -6  11  365.40   25.88   0
  -5   6  11  268.34   30.18   0
   5   6 -11  357.13   27.39   0
  -4  -6  11   24.65    9.73   0
   4  -6 -11   36.79   12.22   0
   4   6 -11   29.04    9.01   0
  -4   6  11   40.57   13.46   0
   3  -6 -11  506.31   36.47   0
  -3  -6  11  527.51   35.69   0
  -3   6  11  518.64   37.86   0
   3   6 -11  510.46   34.91   0
  -2  -6  11  189.51   18.99   0
   2  -6 -11  229.25   19.54   0
   2   6 -11  230.74   18.03   0
  -2   6  11  248.66   21.45   0
   1  -6 -11   -3.11    7.61   0
  -1  -6  11    4.22    7.70   0
  -1   6  11   -1.61    9.11   0
   1   6 -11    8.25    6.30   0
   0  -6 -11   67.66    9.61   0
   0  -6  11   66.37   10.95   0
   0   6  11   70.01   11.72   0
   0   6 -11   59.66    8.45   0
  -1  -6 -11   31.67    6.83   0
   1  -6  11   25.78    9.08   0
   1   6  11   14.20   10.30   0
  -1   6 -11   10.64    6.87   0
  -2  -6 -11   69.29    9.89   0
   2  -6  11   84.29   11.99   0
   2   6  11  101.94   14.03   0
  -2   6 -11   87.25   10.67   0
   3  -6  11   34.64   11.75   0
  -3  -6 -11   40.95    5.25   0
   3   6  11   63.37   12.66   0
  -3   6 -11   37.65    9.86   0
   4  -6  11   -2.18   13.69   0
   4   6  11    5.63   14.52   0
  -4   6 -11   -7.98   11.45   0
   5  -6  11    0.41   16.79   0
   5   6  11  -11.19   18.24   0
  -5   6 -11   40.43   15.48   0
   6  -7 -11   19.59   16.94   0
   6   7 -11   20.40   12.90   0
  -6   7  11    1.47   15.73   0
   5  -7 -11   35.21   15.43   0
  -5  -7  11   35.54    9.31   0
   5   7 -11   17.03   10.51   0
  -5   7  11   32.85   15.39   0
   4  -7 -11  121.57   16.87   0
  -4  -7  11  125.13   16.36   0
  -4   7  11  157.07   18.62   0
   4   7 -11  121.70   15.49   0
   3  -7 -11   48.11   12.44   0
  -3  -7  11   64.67   10.79   0
   3   7 -11   46.07    9.28   0
  -3   7  11   63.91   14.14   0
   2  -7 -11    1.83    9.19   0
  -2  -7  11   -5.06    7.89   0
   2   7 -11    1.36    6.63   0
  -2   7  11   21.32   11.10   0
   1  -7 -11   -4.72    8.31   0
  -1  -7  11   15.99    8.51   0
   1   7 -11   11.36    6.72   0
  -1   7  11   17.55    9.94   0
   0  -7  11  165.08   17.10   0
   0  -7 -11  183.79   15.65   0
   0   7  11  182.30   19.63   0
   0   7 -11  179.01   15.48   0
   1  -7  11   17.09    9.33   0
  -1  -7 -11   29.79    7.38   0
   1   7  11   32.96   10.84   0
  -1   7 -11   37.36    7.96   0
   2  -7  11  -10.80    9.43   0
  -2  -7 -11   -9.36    5.68   0
  -2   7 -11   11.61    8.07   0
   2   7  11   -3.83   10.74   0
   3  -7  11   -8.11   10.74   0
  -3   7 -11    8.98    9.75   0
   3   7  11   14.88   12.92   0
   4  -7  11   46.87   15.00   0
  -4   7 -11   47.27   13.86   0
   4   7  11   52.42   16.32   0
   6  -8 -11   -3.54   18.56   0
   6   8 -11   14.16   13.09   0
  -6   8  11    3.24   17.92   0
  -5  -8  11   -8.87    8.14   0
   5  -8 -11  -14.60   15.78   0
  -5  -8  11   -2.07    7.45   0
   5   8 -11   24.32   11.05   0
  -5   8  11   13.80   15.60   0
   4  -8 -11    8.65   13.29   0
  -4  -8  11   38.42   10.10   0
   4   8 -11   36.45    9.50   0
  -4   8  11   26.01   14.63   0
  -3  -8  11    6.08    9.15   0
   3  -8 -11    0.60   11.51   0
  -3   8  11   -4.15   11.75   0
   3   8 -11    8.93    8.07   0
  -2  -8  11  311.75   24.63   0
   2  -8 -11  335.65   26.06   0
   2   8 -11  325.30   23.35   0
  -2   8  11  274.22   27.23   0
  -1  -8  11   29.79    9.34   0
   1  -8 -11   22.90    9.19   0
  -1   8  11    8.13   11.93   0
   1   8 -11   28.32    7.37   0
   0  -8 -11   -2.72    7.37   0
   0  -8  11   12.88    8.73   0
   0   8 -11    5.01    7.15   0
   0   8  11   -1.29   10.82   0
  -1  -8 -11   20.35    7.47   0
   1  -8  11   16.52    9.64   0
  -1   8 -11    9.58    7.78   0
   1   8  11   14.89   11.69   0
   2  -8  11   36.22   11.66   0
  -2  -8 -11   66.92    8.01   0
   2   8  11   74.70   14.54   0
  -2   8 -11   46.68    9.77   0
   3  -8  11   95.33   15.46   0
   3   8  11  115.11   17.26   0
  -3   8 -11   77.64   12.90   0
   4  -8  11   29.19   15.48   0
  -4   8 -11   12.32   14.68   0
   4   8  11   13.76   16.64   0
  -5  -9  11   24.66    7.36   0
  -5  -9  11    8.92    7.40   0
   5  -9 -11   10.03   17.10   0
  -5   9  11   36.87   18.46   0
   5   9 -11   26.45   11.56   0
   4  -9 -11   51.08   15.91   0
  -4  -9  11   77.88   12.16   0
  -4   9  11   54.10   16.73   0
   4   9 -11   58.40   10.94   0
  -3  -9  11   45.31   11.19   0
   3  -9 -11   59.36   14.17   0
  -3   9  11   51.87   14.50   0
   3   9 -11   52.46   10.24   0
  -2  -9  11   37.80   10.23   0
   2  -9 -11   47.33   12.47   0
  -2   9  11   45.54   12.86   0
   2   9 -11   25.50    8.72   0
  -1  -9  11   35.30   10.44   0
   1  -9 -11   25.32    9.98   0
  -1   9  11   44.07   12.81   0
   1   9 -11   23.17    8.20   0
   0  -9 -11  169.44   16.94   0
   0  -9  11  192.29   18.73   0
   0   9 -11  186.77   17.11   0
   0   9  11  196.68   22.13   0
   1  -9  11   46.03   11.46   0
  -1  -9 -11   55.86    9.35   0
   1   9  11   78.90   14.33   0
  -1   9 -11   61.18   10.05   0
   2  -9  11   28.79   12.03   0
  -2  -9 -11    2.22    6.22   0
  -2  -9 -11   -0.93    6.19   0
  -2   9 -11    9.20    9.55   0
   2   9  11   24.18   13.32   0
   3  -9  11   20.39   13.79   0
  -3   9 -11    8.76   11.66   0
   3   9  11   15.64   14.90   0
   4  -9  11  100.68   18.56   0
   4   9  11  142.86   21.76   0
  -4   9 -11  103.20   18.12   0
   5 -10 -11  -32.66   17.80   0
   5  10 -11   18.14   11.91   0
  -5  10  11   16.75   19.51   0
  -4 -10  11   10.39   10.82   0
   4 -10 -11    8.56   15.61   0
  -4 -10  11  -20.58    9.19   0
   4  10 -11   10.02   10.30   0
  -4  10  11   13.65   16.65   0
   3 -10 -11   -6.58   13.46   0
  -3 -10  11   -9.23   10.15   0
   3  10 -11    2.62    8.99   0
  -3  10  11   -5.01   13.58   0
  -2 -10  11  148.75   17.33   0
   2 -10 -11  145.80   17.40   0
   2  10 -11  144.75   15.97   0
  -2  10  11  134.74   18.80   0
   1 -10 -11   54.37   11.64   0
  -1 -10  11   49.85   11.38   0
  -1  10  11   61.83   14.94   0
   1  10 -11   42.79    9.83   0
   0 -10  11  -15.69   10.41   0
   0 -10 -11    2.30    8.87   0
   0  10 -11   -0.02    8.60   0
   0  10  11   -3.70   12.91   0
  -1 -10 -11    9.98    7.85   0
   1 -10  11    5.04   11.76   0
  -1 -10 -11    2.65    7.60   0
   1  10  11    7.55   12.53   0
  -1  10 -11   22.82    9.62   0
  -2 -10 -11   88.34    9.85   0
  -2 -10 -11   90.12    9.82   0
   2 -10  11   64.24   14.45   0
   2  10  11   88.12   16.64   0
  -2  10 -11   59.69   13.18   0
   3 -10  11  -13.37   14.62   0
   3  10  11   28.51   16.69   0
  -3  10 -11   10.68   13.36   0
   4 -11 -11    4.02   17.18   0
  -4 -11  11    4.32   10.98   0
  -4 -11  11  -13.47   10.45   0
   4  11 -11    0.52   11.01   0
  -4  11  11   12.56   19.35   0
  -3 -11  11   38.32   12.30   0
  -3 -11  11   12.18   11.88   0
   3 -11 -11   60.53   15.31   0
   3  11 -11   32.55   10.77   0
  -3  11  11    5.32   16.25   0
   2 -11 -11   11.77   13.28   0
  -2 -11  11   10.86   10.60   0
  -2  11  11   -7.50   14.86   0
   2  11 -11    7.18    9.09   0
   1 -11 -11   49.28   11.40   0
  -1 -11  11   49.76   12.25   0
   1  11 -11   37.83    9.98   0
  -1  11  11   55.99   15.71   0
   0 -11 -11   91.36   12.61   0
   0 -11 -11   74.04   11.78   0
   0 -11  11   81.03   14.12   0
   0  11  11  104.74   18.04   0
   0  11 -11   72.07   12.52   0
  -1 -11 -11   -1.25    8.39   0
  -1 -11 -11    0.53    8.06   0
   1 -11  11   10.28   13.08   0
   1  11  11    5.14   14.76   0
  -1  11 -11   22.67   10.79   0
   2 -11  11   -5.10   13.79   0
  -2 -11 -11   -4.40    5.25   0
  -2 -11 -11   -2.80    4.94   0
   2  11  11   15.30   16.34   0
  -2  11 -11   10.47   12.05   0
   3 -11  11   -6.48   19.04   0
  -3  11 -11   36.32   15.78   0
   3  11  11   23.01   18.66   0
   4 -12 -11   11.32   19.17   0
  -4 -12  11   14.64   10.64   0
  -4 -12  11    8.65   12.03   0
  -4  12  11    4.24   19.51   0
  -3 -12  11   89.57   14.75   0
  -3 -12  11   50.93   13.44   0
   3 -12 -11   30.89   16.52   0
   3  12 -11   24.74   12.12   0
  -3  12  11   59.11   19.50   0
  -2 -12  11   17.50   14.16   0
  -2 -12  11    6.34   11.40   0
   2 -12 -11   22.54   15.10   0
   2 -12 -11  -11.05   14.31   0
  -2  12  11   47.49   18.10   0
   2  12 -11  -14.19   10.51   0
   1 -12 -11   18.32   12.08   0
  -1 -12  11   14.41   11.66   0
  -1 -12  11   -3.06   15.36   0
   1 -12 -11    0.63   12.06   0
  -1  12  11   20.10   17.12   0
   1  12 -11   17.35   10.57   0
   0 -12  11   -7.28   12.23   0
   0 -12  11   15.51   17.40   0
   0 -12 -11    7.56   10.22   0
   0 -12 -11    5.12    9.96   0
   0  12 -11   17.73   11.41   0
   0  12  11    4.09   16.30   0
   1 -12  11   17.99   15.16   0
  -1 -12 -11   34.91    9.37   0
  -1 -12 -11   32.40    8.80   0
   1  12  11   35.33   18.36   0
  -1  12 -11   43.29   12.27   0
   2 -12  11    9.11   15.00   0
   2 -12  11   46.39   21.07   0
   2  12  11   30.90   18.45   0
  -2  12 -11   29.07   13.27   0
  -3 -13  11   34.42   13.78   0
   3 -13 -11    2.87   17.17   0
  -3 -13  11   17.62   13.70   0
  -2 -13  11   64.04   14.69   0
   2 -13 -11   58.05   17.09   0
  -2 -13  11   75.02   16.88   0
   2 -13 -11   40.67   15.76   0
   2  13 -11   21.00   12.26   0
  -2  13  11    6.86   19.35   0
  -1 -13  11   76.42   14.77   0
   1 -13 -11   64.61   14.60   0
   1 -13 -11   71.67   14.31   0
  -1 -13  11   47.03   18.45   0
  -1  13  11   59.03   18.74   0
   1  13 -11   51.25   13.57   0
   0 -13  11   21.55   18.79   0
   0 -13 -11   28.69   11.03   0
   0 -13  11   14.16   14.02   0
   0  13 -11   24.75   12.38   0
   0  13  11   -4.41   17.10   0
   1 -13  11    6.02   17.05   0
   1 -13  11  -33.80   20.54   0
  -1 -13 -11   -5.42    9.32   0
  -1 -13 -11   10.22    8.53   0
   1  13  11   -1.80   19.59   0
  -1  13 -11    4.66   13.38   0
   7   0 -12  -26.85   17.02   0
  -7   0  12  -10.97   12.39   0
  -6   0  12   14.70   11.78   0
   6   0 -12   24.67   14.19   0
  -5   0  12   67.28   13.10   0
  -4   0  12   39.44   11.53   0
   4   0 -12   32.61   11.15   0
  -3   0  12   49.75   10.97   0
   3   0 -12   37.00   10.14   0
  -2   0  12  105.72   13.47   0
   2   0 -12  108.13   14.21   0
  -1   0  12  221.44   21.23   0
   1   0 -12  285.59   20.19   0
   0   0 -12  255.79   19.84   0
   0   0  12  261.64   21.77   0
   1   0  12    9.43    9.69   0
  -1   0 -12    0.90    6.24   0
  -2   0 -12    0.90    6.13   0
   2   0  12    4.28   10.77   0
  -3   0 -12   12.36    7.00   0
   3   0  12   13.67   12.21   0
   4   0  12    4.78   14.34   0
  -4   0 -12   23.52    9.17   0
   5   0  12   43.49   17.64   0
   7  -1 -12   15.63   18.81   0
  -7  -1  12   26.21   12.46   0
  -7   1  12   18.39   13.51   0
   7   1 -12  -25.76   17.25   0
   6  -1 -12   65.02   16.24   0
  -6  -1  12   93.84   14.16   0
   6   1 -12   63.69   15.18   0
  -6   1  12   58.13   13.78   0
   5  -1 -12   12.75   12.00   0
  -5  -1  12    1.02   10.86   0
  -5   1  12   36.75   12.78   0
   5   1 -12    8.99   11.56   0
   4  -1 -12   13.28   10.32   0
  -4  -1  12   -0.62   10.45   0
  -4   1  12   -4.71   10.69   0
   4   1 -12   16.62   10.29   0
   3  -1 -12  117.40   15.68   0
  -3  -1  12  119.20   15.47   0
  -3   1  12  114.56   14.35   0
   3   1 -12  106.97   15.14   0
   2  -1 -12   35.58    9.06   0
  -2  -1  12   34.18    9.59   0
   2   1 -12   41.08    8.84   0
  -2   1  12   27.57   10.32   0
   1  -1 -12   54.94    9.10   0
  -1  -1  12   42.24    9.80   0
  -1   1  12   53.77   10.82   0
   1   1 -12   38.25    8.18   0
   0  -1  12   41.56   10.29   0
   0  -1 -12   28.11    7.50   0
   0   1 -12   44.20    7.89   0
   0   1  12   42.39   10.46   0
  -1  -1 -12   59.05    8.31   0
   1  -1  12   37.12   11.12   0
   1   1  12   58.49   11.40   0
  -1   1 -12   60.75    8.64   0
   2  -1  12   55.10   12.32   0
  -2  -1 -12   45.70    8.01   0
   2   1  12   49.71   12.47   0
  -2   1 -12   54.40    8.26   0
   3  -1  12   46.04   13.26   0
  -3  -1 -12   46.52    8.11   0
  -3   1 -12   40.15    8.47   0
   3   1  12   49.06   13.75   0
   4  -1  12   24.43   15.02   0
  -4  -1 -12   23.77    8.46   0
   4   1  12   18.49   14.48   0
  -4   1 -12   31.46    9.79   0
   5  -1  12   -7.95   18.13   0
   5   1  12    7.74   17.23   0
   7  -2 -12   -2.33   18.87   0
  -7  -2  12   13.47   10.69   0
  -7   2  12  -15.86   14.13   0
  -6  -2  12    2.80   11.19   0
   6  -2 -12   -0.78   14.93   0
  -6   2  12    6.15   12.85   0
   6   2 -12   13.42   14.36   0
  -5  -2  12   49.97   11.61   0
   5  -2 -12   34.74   13.34   0
  -5   2  12   43.56   13.18   0
   5   2 -12   45.41   12.98   0
   4  -2 -12   96.99   13.75   0
  -4  -2  12  115.50   14.91   0
   4   2 -12  124.85   16.61   0
  -4   2  12  111.30   15.56   0
  -3  -2  12   29.35    9.83   0
   3  -2 -12   38.62   10.39   0
   3   2 -12   27.37    9.67   0
  -3   2  12   17.78   10.47   0
  -2  -2  12    4.63    8.95   0
   2  -2 -12   -1.18    8.34   0
  -2   2  12   -1.00    9.25   0
   2   2 -12   -4.38    7.21   0
  -1  -2  12   48.19   10.57   0
   1  -2 -12   61.74    9.40   0
  -1   2  12   60.74   11.32   0
   1   2 -12   47.46    8.53   0
   0  -2 -12    3.83    7.08   0
   0  -2  12   13.61    8.72   0
   0   2  12   10.79    9.62   0
   0   2 -12   15.01    6.72   0
   1  -2  12   51.58   11.42   0
  -1  -2 -12   49.20    7.87   0
  -1   2 -12   48.18    8.01   0
   1   2  12   61.47   11.88   0
   2  -2  12   33.07   11.34   0
  -2  -2 -12   11.73    6.57   0
  -2   2 -12   22.00    7.44   0
   2   2  12   28.39   11.45   0
   3  -2  12    1.26   12.37   0
  -3  -2 -12    1.68    6.57   0
   3   2  12   18.60   12.86   0
  -3   2 -12   -7.01    7.22   0
   4  -2  12    3.47   14.71   0
  -4  -2 -12    1.25    7.30   0
   4   2  12   21.74   15.19   0
  -4   2 -12   21.35    9.74   0
   5  -2  12   95.22   20.16   0
   5   2  12  105.37   19.63   0
  -5   2 -12   76.86   13.58   0
  -7  -3  12   80.06   11.24   0
   7  -3 -12   92.51   21.86   0
  -7   3  12   64.57   17.89   0
   6  -3 -12   65.31   17.66   0
  -6   3  12  106.12   17.01   0
   6   3 -12   64.53   15.56   0
   5  -3 -12   -1.57   12.78   0
  -5  -3  12   30.52   11.14   0
   5   3 -12    8.41   11.47   0
  -5   3  12   23.64   12.24   0
  -4  -3  12    4.31    9.97   0
   4  -3 -12   25.44   11.23   0
   4   3 -12   11.02    9.89   0
  -4   3  12   12.52   11.07   0
   3  -3 -12   40.23   10.99   0
  -3  -3  12   52.58   10.85   0
   3   3 -12   43.80    9.48   0
  -3   3  12   53.88   12.25   0
  -2  -3  12  324.43   25.86   0
   2  -3 -12  360.15   25.82   0
   2   3 -12  348.72   25.02   0
  -2   3  12  323.19   26.76   0
  -1  -3  12   -2.41    8.12   0
   1  -3 -12   -9.21    8.06   0
   1   3 -12    4.55    6.48   0
  -1   3  12    1.18    8.97   0
   0  -3 -12   26.23    7.73   0
   0  -3  12   11.93    9.06   0
   0   3  12   20.57   10.10   0
   0   3 -12   19.95    7.02   0
   1  -3  12   14.33   10.00   0
  -1  -3 -12    8.69    6.55   0
  -1   3 -12   13.50    6.89   0
   1   3  12   13.04   10.16   0
   2  -3  12   -2.66   10.76   0
  -2  -3 -12   15.02    6.55   0
  -2   3 -12   16.26    7.15   0
   2   3  12   20.82   11.94   0
   3  -3  12   21.08   13.00   0
  -3  -3 -12   19.77    6.57   0
  -3   3 -12   16.18    8.36   0
   3   3  12   17.96   13.13   0
  -4  -3 -12   19.46    6.14   0
   4  -3  12    7.92   15.03   0
  -4   3 -12   35.08   10.86   0
   4   3  12   42.36   14.58   0
   5  -3  12   20.32   18.96   0
   5   3  12   13.74   19.34   0
  -5   3 -12   22.86   13.49   0
  -6  -4  12   33.99   10.94   0
   6  -4 -12   42.49   16.86   0
   6   4 -12   -2.12   13.97   0
  -6   4  12   38.44   15.04   0
  -5  -4  12   23.60   10.64   0
   5  -4 -12   43.94   14.50   0
   5   4 -12   -7.20   11.42   0
  -5   4  12   -4.76   12.76   0
  -4  -4  12  224.74   21.77   0
   4  -4 -12  260.08   24.02   0
  -4   4  12  211.99   23.78   0
   4   4 -12  258.19   21.83   0
   3  -4 -12   98.99   13.97   0
  -3  -4  12  109.14   13.81   0
  -3   4  12  119.69   15.80   0
   3   4 -12  128.15   14.92   0
   2  -4 -12   20.75    9.23   0
  -2  -4  12   12.43    8.94   0
   2   4 -12   13.74    7.87   0
  -2   4  12   28.01   10.61   0
  -1  -4  12    1.62    8.33   0
   1  -4 -12    5.09    8.26   0
   1   4 -12    8.65    6.80   0
  -1   4  12   -6.34    9.16   0
   0  -4  12  112.74   15.65   0
   0  -4 -12  136.70   13.91   0
   0   4  12  130.39   15.74   0
   0   4 -12  130.67   13.07   0
   1  -4  12   12.53    9.74   0
  -1  -4 -12   23.21    6.95   0
  -1   4 -12    2.94    6.65   0
   1   4  12    7.65   10.90   0
  -2  -4 -12   16.12    6.81   0
   2  -4  12   12.94   10.95   0
   2   4  12   26.74   12.34   0
  -2   4 -12   20.88    7.62   0
  -3  -4 -12   22.22    6.50   0
   3  -4  12   -7.09   12.04   0
   3   4  12    5.63   12.62   0
  -3   4 -12   25.51    8.79   0
   4  -4  12   34.88   15.76   0
   4   4  12   19.39   16.35   0
  -4   4 -12   13.85   11.34   0
  -6  -5  12   -4.80    9.22   0
   6  -5 -12  -12.88   16.90   0
  -6   5  12   18.53   15.77   0
   6   5 -12   33.43   14.99   0
   5  -5 -12  205.79   24.82   0
  -5  -5  12  205.89   20.96   0
  -5   5  12  197.50   26.43   0
   5   5 -12  209.89   21.66   0
  -4  -5  12   21.44   10.79   0
   4  -5 -12   19.15   12.32   0
   4   5 -12   10.98    9.94   0
  -4   5  12   38.27   13.90   0
  -3  -5  12  113.63   13.84   0
   3  -5 -12   79.83   13.30   0
   3   5 -12   89.88   11.64   0
  -3   5  12   94.17   15.18   0
  -2  -5  12   76.11   11.99   0
   2  -5 -12   63.96   11.54   0
   2   5 -12   69.30    9.79   0
  -2   5  12   70.25   13.38   0
  -1  -5  12   15.55    8.74   0
   1  -5 -12    8.95    8.75   0
  -1   5  12    3.48   10.45   0
   1   5 -12   16.50    7.69   0
   0  -5  12   -3.40    9.20   0
   0  -5 -12    5.28    7.52   0
   0   5 -12    6.50    6.96   0
   0   5  12   -6.92    9.69   0
   1  -5  12   -8.33    9.54   0
  -1  -5 -12    0.50    6.79   0
   1   5  12    4.08   10.91   0
  -1   5 -12   -2.04    7.18   0
   2  -5  12   29.44   10.67   0
  -2  -5 -12    1.13    6.74   0
  -2   5 -12   15.38    8.01   0
   2   5  12    9.07   12.33   0
   3  -5  12   11.70   12.82   0
  -3  -5 -12   26.38    6.13   0
   3   5  12   14.74   13.93   0
  -3   5 -12   38.96    9.98   0
   4  -5  12    9.16   15.65   0
   4   5  12   27.03   15.66   0
  -4   5 -12   19.58   12.74   0
   6  -6 -12   32.63   18.11   0
  -6  -6  12    9.56    8.22   0
  -6   6  12   25.33   17.31   0
   6   6 -12   47.89   14.57   0
   5  -6 -12  196.18   25.44   0
  -5  -6  12  222.63   21.59   0
  -5   6  12  183.49   23.73   0
   5   6 -12  207.16   21.50   0
   4  -6 -12   36.55   13.55   0
  -4  -6  12   25.98   10.96   0
  -4   6  12   13.12   13.54   0
   4   6 -12   17.33    9.72   0
  -3  -6  12  177.21   18.62   0
   3  -6 -12  173.46   19.76   0
  -3   6  12  130.64   18.90   0
   3   6 -12  165.86   17.23   0
   2  -6 -12  -19.64    9.60   0
  -2  -6  12   11.65    9.33   0
   2   6 -12    8.39    7.70   0
  -2   6  12   14.78   11.73   0
   1  -6 -12    0.61    8.64   0
  -1  -6  12   -4.29    9.04   0
   1   6 -12    1.75    7.25   0
  -1   6  12   -6.92   10.10   0
   0  -6  12   -2.47    9.27   0
   0  -6 -12    2.60    7.45   0
   0   6 -12   11.78    7.28   0
   0   6  12    4.62   10.92   0
  -1  -6 -12   -8.55    7.04   0
   1  -6  12    9.95   10.20   0
   1   6  12    0.23   11.69   0
  -1   6 -12   -4.04    7.43   0
  -2  -6 -12    1.08    6.97   0
   2  -6  12   25.73   11.94   0
   2   6  12    6.30   13.20   0
  -2   6 -12    0.29    8.48   0
   3  -6  12   35.16   13.81   0
  -3  -6 -12   17.73    5.42   0
  -3   6 -12   17.08   10.42   0
   3   6  12   33.38   15.44   0
   4  -6  12    3.77   15.84   0
  -4   6 -12   -1.97   13.70   0
   4   6  12  -26.97   17.07   0
   6  -7 -12   31.32   18.54   0
   6   7 -12   23.42   14.56   0
  -6   7  12   -5.82   18.86   0
  -5  -7  12  165.43   19.13   0
   5  -7 -12  139.44   20.86   0
  -5   7  12  128.72   20.90   0
   5   7 -12  154.93   19.46   0
   4  -7 -12    1.09   13.49   0
  -4  -7  12   13.01   10.99   0
   4   7 -12   20.37   10.13   0
  -4   7  12   32.47   15.13   0
   3  -7 -12   26.13   12.13   0
  -3  -7  12   11.96   10.39   0
   3   7 -12   -1.71    8.70   0
  -3   7  12    2.12   12.90   0
   2  -7 -12   -7.90    9.74   0
  -2  -7  12   17.45   10.14   0
  -2   7  12   10.97   12.71   0
   2   7 -12    3.96    7.65   0
   1  -7 -12   11.07    9.87   0
  -1  -7  12    6.69    8.98   0
  -1   7  12   -6.62   11.44   0
   1   7 -12    4.32    7.18   0
   0  -7 -12    0.41    8.29   0
   0  -7  12    6.47    9.81   0
   0   7 -12    3.13    7.74   0
   0   7  12    1.95   11.95   0
  -1  -7 -12   -1.75    7.71   0
   1  -7  12   -6.44   10.60   0
  -1   7 -12   -5.22    7.82   0
   1   7  12  -10.60   11.78   0
  -2  -7 -12    5.19    7.03   0
   2  -7  12   13.91   12.37   0
   2   7  12   -1.88   13.42   0
  -2   7 -12   15.40    9.55   0
  -3  -7 -12    5.85    4.51   0
  -3  -7 -12   11.39    4.24   0
   3  -7  12   11.00   13.97   0
   3   7  12   14.64   13.85   0
  -3   7 -12    5.69   11.05   0
   4  -7  12   12.04   16.03   0
   4   7  12   21.49   17.17   0
  -4   7 -12   21.55   15.55   0
   5  -8 -12   70.18   19.20   0
  -5  -8  12  119.81   14.56   0
   5   8 -12  152.33   19.42   0
  -5   8  12  130.68   22.12   0
   4  -8 -12   18.06   14.77   0
  -4  -8  12   13.27   11.52   0
  -4   8  12   21.96   15.95   0
   4   8 -12    6.94   10.19   0
  -3  -8  12    2.61   10.67   0
   3  -8 -12    9.17   12.48   0
   3   8 -12  -17.86    8.82   0
  -3   8  12   15.41   13.35   0
  -2  -8  12    5.49   10.11   0
   2  -8 -12   -1.84   10.72   0
   2   8 -12    3.02    8.44   0
  -2   8  12   -2.94   12.73   0
   1  -8 -12  -10.85    9.68   0
  -1  -8  12   13.16    9.82   0
   1   8 -12    7.38    8.02   0
  -1   8  12   10.18   12.49   0
   0  -8  12   18.77   10.42   0
   0  -8 -12   22.37    9.28   0
   0   8  12   13.47   13.03   0
   0   8 -12   17.61    8.68   0
   1  -8  12   16.18   11.12   0
  -1  -8 -12    1.69    7.95   0
  -1   8 -12   10.11    9.17   0
   1   8  12   -0.71   13.03   0
   2  -8  12  -12.48   12.92   0
  -2  -8 -12   11.62    7.04   0
  -2   8 -12   -4.32    9.96   0
   2   8  12   -8.60   13.59   0
   3  -8  12   38.95   14.60   0
  -3   8 -12   29.14   12.37   0
   3   8  12    0.73   17.27   0
   5  -9 -12    5.08   18.01   0
  -5  -9  12   -5.00    9.45   0
  -5  -9  12    7.69   10.42   0
   5   9 -12   14.66   12.62   0
  -5   9  12   48.11   20.66   0
  -4  -9  12   33.59   12.33   0
   4  -9 -12   17.70   16.53   0
   4   9 -12    4.74   10.69   0
  -4   9  12   16.67   16.91   0
   3  -9 -12   15.17   13.17   0
  -3  -9  12   -5.21   11.12   0
  -3   9  12   15.93   15.35   0
   3   9 -12   11.87    9.90   0
  -2  -9  12    2.78   10.81   0
   2  -9 -12    4.24   11.23   0
  -2   9  12   -1.75   12.86   0
   2   9 -12    4.26    8.71   0
  -1  -9  12   37.11   11.38   0
   1  -9 -12   13.54   10.95   0
  -1   9  12    1.85   13.09   0
   1   9 -12   -3.30    8.75   0
   0  -9 -12   -5.72    9.28   0
   0  -9  12   20.70   11.54   0
   0   9  12    3.23   13.28   0
   0   9 -12   10.47    9.11   0
   1  -9  12   27.05   12.92   0
  -1  -9 -12  -14.94    7.73   0
  -1   9 -12    6.98    9.62   0
   1   9  12   12.76   14.90   0
   2  -9  12   -1.46   12.93   0
  -2  -9 -12   13.79    7.03   0
  -2  -9 -12   18.53    7.53   0
   2   9  12   48.25   16.94   0
  -2   9 -12   -7.13   10.75   0
   3  -9  12   93.42   18.35   0
  -3   9 -12  108.94   16.61   0
   3   9  12  139.80   21.37   0
  -4 -10  12   41.29   13.06   0
   4 -10 -12   31.70   17.30   0
  -4 -10  12   10.25   12.01   0
   4  10 -12   20.55   12.12   0
  -4  10  12  -29.51   18.41   0
   3 -10 -12  -12.84   15.23   0
  -3 -10  12   -1.21   11.89   0
   3  10 -12    8.85    9.94   0
  -3  10  12   14.44   17.17   0
  -2 -10  12   -8.40   11.11   0
   2 -10 -12   15.10   13.15   0
   2  10 -12    4.14    9.82   0
  -2  10  12  -12.56   14.48   0
   1 -10 -12   11.44   11.10   0
  -1 -10  12    1.66   11.46   0
  -1  10  12    0.95   14.93   0
   1  10 -12   -5.98    9.28   0
   0 -10  12   11.31   12.89   0
   0 -10 -12    6.15   10.26   0
   0  10 -12   -4.58    9.54   0
   0  10  12   -0.53   14.40   0
   1 -10  12   28.24   13.30   0
  -1 -10 -12   31.76   10.04   0
  -1 -10 -12   45.70   10.32   0
  -1  10 -12   57.56   11.77   0
   1  10  12   44.09   17.44   0
  -2 -10 -12   35.30    7.55   0
   2 -10  12   43.85   16.49   0
  -2 -10 -12   34.04    7.44   0
  -2  10 -12   55.67   13.07   0
   2  10  12   63.81   18.63   0
  -4 -11  12   30.76   12.92   0
   4 -11 -12   25.89   18.72   0
  -4 -11  12   75.10   14.73   0
  -4  11  12    5.57   19.52   0
  -3 -11  12    3.61   14.05   0
   3 -11 -12   28.92   16.64   0
  -3 -11  12   29.51   14.25   0
  -3  11  12  -32.58   17.39   0
   3  11 -12   10.52   11.16   0
   2 -11 -12   62.36   13.94   0
  -2 -11  12   61.47   13.84   0
  -2  11  12   29.12   17.33   0
   2  11 -12    3.63   10.68   0
   1 -11 -12   -9.72   12.32   0
  -1 -11  12   23.61   12.60   0
   1  11 -12  -18.61    9.66   0
  -1  11  12   -3.11   16.04   0
   0 -11 -12    0.35   10.70   0
   0 -11 -12   -7.70   11.25   0
   0 -11  12    8.04   13.44   0
   0  11 -12    6.80   11.07   0
   0  11  12    3.65   16.85   0
   1 -11  12   66.69   16.43   0
  -1 -11 -12   61.73   11.06   0
  -1 -11 -12   73.95   11.35   0
   1  11  12   82.12   20.64   0
  -2 -11 -12    7.74    7.15   0
  -2 -11 -12    7.51    7.10   0
   2 -11  12  -34.92   15.95   0
  -2  11 -12    1.61   13.01   0
   2  11  12    8.67   18.99   0
  -3 -12  12   13.22   14.81   0
   3 -12 -12   -5.03   17.43   0
  -3 -12  12    4.27   14.95   0
   2 -12 -12   26.04   15.29   0
  -2 -12  12    0.59   16.91   0
  -2 -12  12   52.19   14.09   0
  -2  12  12   15.15   18.37   0
   2  12 -12   35.24   12.67   0
   1 -12 -12   23.29   13.53   0
   1 -12 -12   15.88   13.94   0
  -1 -12  12   22.40   13.83   0
  -1 -12  12  -11.23   17.77   0
  -1  12  12   -2.34   18.81   0
   1  12 -12    5.31   11.31   0
   0 -12  12   29.48   15.20   0
   0 -12 -12   31.84   12.50   0
   0 -12 -12    4.90   12.09   0
   0  12 -12   -4.21   11.61   0
   0  12  12   14.35   18.10   0
   1  12  12   33.09   20.22   0
   6   0 -13   42.46   16.05   0
  -6   0  13   26.95   15.09   0
  -5   0  13   -6.79   12.53   0
   5   0 -13  -18.66   12.61   0
  -4   0  13    2.81   12.29   0
   4   0 -13  -18.35   10.44   0
   3   0 -13  -14.11    9.68   0
  -3   0  13   -6.87   10.89   0
   2   0 -13    8.39    9.12   0
  -2   0  13   13.74   10.56   0
  -1   0  13    0.49    9.60   0
   1   0 -13   -1.19    8.03   0
   0   0  13    5.00   10.56   0
   0   0 -13   -3.81    7.41   0
  -1   0 -13    2.34    7.16   0
   1   0  13   10.91   11.67   0
  -2   0 -13    9.79    7.67   0
   2   0  13   -7.45   12.92   0
   3   0  13   -0.28   15.23   0
  -3   0 -13   -1.18    8.09   0
   4   0  13    6.18   17.64   0
  -4   0 -13   -4.60   10.33   0
   6  -1 -13   -8.62   15.79   0
  -6  -1  13   19.70   14.16   0
  -6   1  13   19.25   14.94   0
   6   1 -13    2.35   15.21   0
   5  -1 -13    2.77   13.21   0
  -5  -1  13    6.09   12.22   0
   5   1 -13    1.87   12.79   0
  -5   1  13   14.21   13.05   0
   4  -1 -13   29.24   12.26   0
  -4  -1  13   67.21   13.41   0
   4   1 -13   16.92   11.87   0
  -4   1  13   44.76   13.78   0
   3  -1 -13   54.82   12.54   0
  -3  -1  13   56.23   13.01   0
   3   1 -13   81.08   12.95   0
  -3   1  13   79.39   14.15   0
  -2  -1  13  149.84   16.87   0
   2  -1 -13  164.87   17.60   0
   2   1 -13  172.66   17.16   0
  -2   1  13  140.31   17.12   0
   1  -1 -13   21.50    8.74   0
  -1  -1  13   22.42   10.40   0
   1   1 -13    0.40    8.09   0
  -1   1  13   19.97   11.31   0
   0  -1 -13   25.00    8.46   0
   0  -1  13   33.87   11.35   0
   0   1  13   46.50   11.22   0
   0   1 -13   31.16    8.30   0
   1  -1  13   14.74   11.26   0
  -1  -1 -13    9.73    7.62   0
  -1   1 -13   24.26    7.57   0
   1   1  13   -6.29   11.40   0
  -2  -1 -13   -0.55    7.60   0
   2  -1  13   17.79   12.90   0
   2   1  13  -10.66   13.04   0
  -2   1 -13   -0.53    7.70   0
  -3  -1 -13    7.39    7.98   0
   3  -1  13  -17.97   14.29   0
   3   1  13   18.04   15.12   0
  -3   1 -13   -3.17    8.51   0
  -4  -1 -13    1.04    9.83   0
   4  -1  13    9.33   17.59   0
   4   1  13   34.58   18.81   0
  -4   1 -13   15.31   11.10   0
  -6  -2  13   19.83   14.08   0
   6  -2 -13   23.31   16.60   0
  -6   2  13    2.99   15.17   0
   6   2 -13  -10.01   15.66   0
  -5  -2  13   11.71   12.71   0
   5  -2 -13   31.41   13.75   0
   5   2 -13   36.50   13.71   0
  -5   2  13   51.95   14.86   0
   4  -2 -13  -17.94   11.15   0
  -4  -2  13  -17.84   11.20   0
   4   2 -13    4.91   11.37   0
  -4   2  13   -0.38   12.49   0
   3  -2 -13   18.97   10.29   0
  -3  -2  13   14.86   10.64   0
  -3   2  13    3.41   11.41   0
   3   2 -13   21.45   10.29   0
   2  -2 -13   -0.79    9.47   0
  -2  -2  13    7.61   10.10   0
  -2   2  13   -3.66   11.06   0
   2   2 -13   -0.07    8.59   0
   1  -2 -13   67.76   10.44   0
  -1  -2  13   48.78   11.43   0
  -1   2  13   57.43   12.48   0
   1   2 -13   42.75    9.18   0
   0  -2  13   35.91   11.55   0
   0  -2 -13   45.11    9.15   0
   0   2 -13   43.54    9.19   0
   0   2  13   58.87   12.54   0
  -1  -2 -13   41.85    8.53   0
   1  -2  13   44.58   12.48   0
   1   2  13   46.61   12.65   0
  -1   2 -13   41.29    8.41   0
   2  -2  13    8.51   12.88   0
  -2  -2 -13    4.15    7.45   0
  -2   2 -13   -6.33    8.01   0
   2   2  13   15.84   13.99   0
   3  -2  13   12.63   14.35   0
  -3  -2 -13   23.33    8.04   0
  -3   2 -13   17.69    9.70   0
   3   2  13   48.86   16.52   0
  -4  -2 -13   76.79   11.27   0
   4  -2  13   68.92   18.41   0
   4   2  13   82.56   20.62   0
  -4   2 -13   91.39   13.71   0
  -6  -3  13   36.83   13.76   0
   6  -3 -13    8.33   17.44   0
   6   3 -13  -38.75   14.81   0
  -6   3  13  -19.95   15.26   0
   5  -3 -13   -1.43   13.81   0
  -5  -3  13   -3.58   12.31   0
  -5   3  13   21.78   15.44   0
   5   3 -13   12.61   13.04   0
   4  -3 -13    5.29   12.12   0
  -4  -3  13   -1.53   11.53   0
   4   3 -13   16.23   11.31   0
  -4   3  13    8.26   12.94   0
   3  -3 -13   60.02   12.91   0
  -3  -3  13   85.52   13.76   0
   3   3 -13   82.53   12.35   0
  -3   3  13   71.67   14.71   0
   2  -3 -13   20.96   10.66   0
  -2  -3  13   18.97   11.33   0
  -2   3  13    8.35   10.90   0
   2   3 -13   11.56    8.97   0
   1  -3 -13   -2.53    8.75   0
  -1  -3  13   15.43   10.47   0
   1   3 -13   26.79    8.18   0
  -1   3  13   31.09   11.85   0
   0  -3 -13   27.23    8.73   0
   0  -3  13   47.60   11.02   0
   0   3 -13   33.32    8.51   0
   0   3  13   43.46   12.37   0
  -1  -3 -13   33.18    8.10   0
   1  -3  13   39.01   12.64   0
  -1   3 -13   22.59    8.59   0
   1   3  13   35.58   13.45   0
  -2  -3 -13   19.51    7.74   0
   2  -3  13   22.63   13.03   0
   2   3  13   17.40   13.89   0
  -2   3 -13    3.28    8.25   0
  -3  -3 -13   32.89    8.47   0
   3  -3  13   35.64   15.97   0
  -3   3 -13   44.10   10.72   0
   3   3  13   36.56   16.12   0
   4  -3  13   45.33   18.48   0
  -4  -3 -13   42.66    8.33   0
   4   3  13   63.69   20.29   0
  -4   3 -13   51.53   13.53   0
  -6  -4  13   52.47   14.01   0
   6  -4 -13   51.11   18.50   0
   6   4 -13   52.21   17.27   0
  -6   4  13   25.71   17.94   0
  -5  -4  13   23.64   12.76   0
   5  -4 -13   13.63   14.84   0
  -5   4  13   37.88   16.29   0
   5   4 -13   35.35   14.37   0
  -4  -4  13   74.29   13.60   0
   4  -4 -13   45.41   13.77   0
  -4   4  13   69.17   15.43   0
   4   4 -13   38.65   12.12   0
  -3  -4  13   -9.93   10.34   0
   3  -4 -13   17.79   11.32   0
   3   4 -13   -7.59    8.93   0
  -3   4  13    7.54   12.63   0
  -2  -4  13   97.80   14.41   0
   2  -4 -13   87.41   13.96   0
  -2   4  13  134.13   18.03   0
   2   4 -13  103.79   14.25   0
   1  -4 -13   -6.72    9.25   0
  -1  -4  13   16.06   10.17   0
  -1   4  13    5.98   11.62   0
   1   4 -13    3.57    7.99   0
   0  -4 -13   16.81    8.85   0
   0  -4  13   40.75   11.27   0
   0   4  13   47.43   13.11   0
   0   4 -13   38.98    8.52   0
  -1  -4 -13   -5.28    7.56   0
   1  -4  13    1.38   11.10   0
   1   4  13   19.66   12.64   0
  -1   4 -13    5.78    8.16   0
   2  -4  13   25.75   12.91   0
  -2  -4 -13   37.39    8.38   0
   2   4  13   50.84   14.85   0
  -2   4 -13   32.06    9.54   0
   3  -4  13   34.44   15.44   0
  -3  -4 -13   30.31    8.21   0
   3   4  13   53.55   17.90   0
  -3   4 -13   39.55   11.04   0
   4  -4  13   50.35   18.90   0
   4   4  13   17.27   20.58   0
  -4   4 -13   14.08   13.95   0
   6  -5 -13   56.72   19.86   0
  -6  -5  13   58.20   14.24   0
  -6   5  13   46.37   19.34   0
   5  -5 -13   55.69   17.63   0
  -5  -5  13   78.10   14.99   0
  -5   5  13   84.18   18.28   0
   5   5 -13   56.30   14.25   0
  -4  -5  13  148.73   17.47   0
   4  -5 -13  142.87   17.71   0
   4   5 -13   99.20   15.01   0
  -4   5  13  141.11   19.81   0
   3  -5 -13   -5.20   11.38   0
  -3  -5  13   19.29   10.83   0
   3   5 -13    6.44    9.66   0
  -3   5  13   12.56   12.78   0
   2  -5 -13   50.15   12.02   0
  -2  -5  13   58.47   12.15   0
  -2   5  13   50.88   13.83   0
   2   5 -13   47.00   10.08   0
   1  -5 -13   17.01    9.93   0
  -1  -5  13    9.43   10.17   0
  -1   5  13   18.96   12.42   0
   1   5 -13   12.81    8.68   0
   0  -5  13   21.56   11.35   0
   0  -5 -13   29.56    9.35   0
   0   5 -13   21.38    8.72   0
   0   5  13   25.95   12.82   0
  -1  -5 -13   18.85    8.24   0
   1  -5  13   18.32   11.67   0
   1   5  13   29.73   14.34   0
  -1   5 -13   21.38    8.78   0
  -2  -5 -13   76.64   10.20   0
   2  -5  13   82.96   15.53   0
   2   5  13   93.57   16.33   0
  -2   5 -13   85.55   12.18   0
   3  -5  13   24.34   15.78   0
  -3  -5 -13   27.50    7.62   0
   3   5  13   30.50   17.02   0
  -3   5 -13   25.26   11.63   0
  -5  -6  13  135.41   16.37   0
   5  -6 -13   88.22   18.77   0
  -5   6  13   91.65   20.69   0
   5   6 -13   80.77   15.34   0
  -4  -6  13   26.60   13.08   0
   4  -6 -13   17.70   14.83   0
   4   6 -13   28.28   11.45   0
  -4   6  13   34.75   16.41   0
   3  -6 -13    4.24   12.82   0
  -3  -6  13   37.25   11.80   0
  -3   6  13   16.91   14.24   0
   3   6 -13   19.87    9.95   0
  -2  -6  13   84.17   14.17   0
   2  -6 -13  100.23   14.20   0
  -2   6  13   89.94   15.65   0
   2   6 -13   77.41   11.48   0
   1  -6 -13   25.74   11.33   0
  -1  -6  13   18.60   11.19   0
   1   6 -13   26.72    8.88   0
  -1   6  13   22.72   13.28   0
   0  -6  13   33.87   11.28   0
   0  -6 -13   23.99    9.10   0
   0   6 -13    3.76    8.32   0
   0   6  13   16.31   12.74   0
  -1  -6 -13   34.32    9.00   0
   1  -6  13   36.47   13.20   0
  -1   6 -13   14.40    9.31   0
   1   6  13   19.04   13.60   0
  -2  -6 -13   13.20    8.31   0
   2  -6  13   19.15   13.79   0
   2   6  13   39.28   16.29   0
  -2   6 -13    5.41   10.45   0
  -3  -6 -13   45.08    7.53   0
   3  -6  13   46.66   17.16   0
  -3   6 -13   44.04   13.00   0
   3   6  13   47.52   18.24   0
  -5  -7  13   92.13   15.27   0
   5  -7 -13   84.49   18.65   0
  -5   7  13   16.70   20.27   0
   5   7 -13   43.53   14.28   0
   4  -7 -13   60.74   17.20   0
  -4  -7  13  116.26   15.61   0
  -4   7  13   88.97   18.82   0
   4   7 -13   79.72   13.47   0
   3  -7 -13   67.50   14.39   0
  -3  -7  13   71.51   14.02   0
   3   7 -13   59.83   11.40   0
  -3   7  13   24.52   15.60   0
   2  -7 -13   -7.22   11.26   0
  -2  -7  13   -9.09   10.83   0
   2   7 -13  -10.35    8.69   0
  -2   7  13   -0.74   12.32   0
   1  -7 -13    5.30   10.52   0
  -1  -7  13   11.58   11.75   0
  -1   7  13   23.91   13.61   0
   1   7 -13   20.77    9.15   0
   0  -7  13   62.15   13.84   0
   0  -7 -13   64.69   11.52   0
   0   7 -13   70.67   10.70   0
   0   7  13   87.47   16.73   0
   1  -7  13   63.31   14.69   0
  -1  -7 -13   52.55    9.96   0
   1   7  13   44.46   15.50   0
  -1   7 -13   43.64   10.32   0
  -2  -7 -13   18.71    8.19   0
   2  -7  13   30.77   13.55   0
  -2   7 -13   10.80   11.45   0
   2   7  13   18.76   16.70   0
   3  -7  13   42.94   17.63   0
  -3  -7 -13   27.35    6.07   0
  -3  -7 -13   37.99    6.55   0
   3   7  13    8.69   19.35   0
  -3   7 -13   48.10   14.31   0
  -5  -8  13   23.33   14.07   0
   5  -8 -13   18.40   17.70   0
  -5   8  13    3.59   19.93   0
   4  -8 -13   35.31   17.88   0
  -4  -8  13   77.11   15.24   0
  -4   8  13   79.77   20.32   0
   3  -8 -13   35.86   13.54   0
  -3  -8  13   12.25   12.70   0
  -3   8  13   11.64   15.39   0
   3   8 -13    1.53   10.65   0
  -2  -8  13   31.38   12.52   0
   2  -8 -13   11.90   12.54   0
   2   8 -13   24.43   10.12   0
  -2   8  13   35.87   15.21   0
   1  -8 -13   31.44   11.41   0
  -1  -8  13   17.45   12.58   0
  -1   8  13   29.02   15.37   0
   1   8 -13   39.14   10.08   0
   0  -8  13   71.61   14.28   0
   0  -8 -13   76.16   11.93   0
   0   8  13   67.81   16.58   0
   0   8 -13   46.20   10.93   0
   1  -8  13  163.32   22.72   0
  -1  -8 -13  178.71   16.96   0
  -1   8 -13  126.72   18.54   0
   1   8  13  193.05   26.26   0
   2  -8  13   58.30   16.17   0
  -2  -8 -13   92.33   12.54   0
  -2   8 -13   68.81   13.82   0
   2   8  13   77.29   19.61   0
   4  -9 -13   34.54   17.92   0
  -4  -9  13   81.47   15.54   0
  -4   9  13   44.74   20.88   0
   4   9 -13   35.74   13.30   0
  -3  -9  13   23.39   14.05   0
   3  -9 -13   61.86   16.70   0
  -3   9  13   21.97   18.60   0
   3   9 -13   28.66   11.48   0
  -2  -9  13   62.91   14.30   0
   2  -9 -13   73.53   14.52   0
   2   9 -13   50.87   11.79   0
  -2   9  13   71.79   17.32   0
   1  -9 -13   -3.29   12.14   0
  -1  -9  13   14.14   13.11   0
   1   9 -13   17.63   10.11   0
  -1   9  13   12.37   16.90   0
   0  -9  13   -2.33   13.00   0
   0  -9 -13    3.48   10.84   0
   0   9  13  -12.71   15.48   0
   0   9 -13    3.23   10.41   0
  -1  -9 -13  122.81   15.15   0
   1   9  13  121.33   22.01   0
  -1   9 -13   85.74   14.00   0
  -2  -9 -13  219.03   19.00   0
   2  -9  13  214.71   26.44   0
  -2   9 -13  207.67   23.82   0
   2   9  13  292.86   32.36   0
  -3 -10  13  -27.81   14.23   0
   3 -10 -13   25.85   16.63   0
   3  10 -13   -7.46   11.50   0
  -3  10  13   14.67   18.86   0
  -2 -10  13    3.61   13.21   0
   2 -10 -13   43.99   15.68   0
   2  10 -13   12.16   10.86   0
  -2  10  13   -8.47   16.52   0
   1 -10 -13  163.86   21.98   0
  -1 -10  13  136.40   18.69   0
  -1  10  13  182.54   22.96   0
   0 -10 -13  127.13   17.28   0
   0 -10  13   98.00   18.49   0
   0  10 -13   73.81   13.81   0
   0  10  13  103.11   20.98   0
   1 -10  13    7.93   15.78   0
  -1 -10 -13   28.66   10.33   0
   1  10  13  -19.83   19.55   0
  -1  10 -13   20.05   12.54   0
  -2 -11  13   47.54   15.70   0
   2 -11 -13   25.74   16.28   0
  -2  11  13   59.13   20.59   0
   2  11 -13   34.08   12.85   0
  -1 -11  13    5.22   15.20   0
   1 -11 -13   -0.14   14.62   0
  -1  11  13    3.54   19.20   0
   1  11 -13   19.74   11.32   0
   0 -11  13   60.77   17.70   0
   0 -11 -13   30.31   12.81   0
   0  11 -13    4.85   12.07   0
   0  11  13   22.05   18.92   0
   5   0 -14  -11.65   15.23   0
  -5   0  14   23.96   15.66   0
  -4   0  14  108.90   17.33   0
   4   0 -14   64.03   15.08   0
   3   0 -14   44.05   12.84   0
  -3   0  14   54.51   14.37   0
   2   0 -14  135.99   17.67   0
  -2   0  14  114.43   16.27   0
   1   0 -14   43.54   10.62   0
  -1   0  14   53.14   13.52   0
   0   0 -14   18.55    9.54   0
   0   0  14   17.66   12.69   0
   1   0  14   35.20   14.28   0
  -1   0 -14   32.55    9.46   0
   2   0  14   35.59   16.20   0
   3   0  14   79.88   19.66   0
  -3   0 -14   60.03   11.42   0
  -5  -1  14   15.03   14.29   0
   5  -1 -14   24.73   15.49   0
   5   1 -14   -5.03   14.99   0
  -5   1  14   19.68   15.56   0
  -4  -1  14   45.56   15.48   0
   4  -1 -14   -3.83   12.77   0
  -4   1  14   12.54   14.50   0
   4   1 -14   35.77   13.27   0
  -3  -1  14    0.51   12.54   0
   3  -1 -14    9.31   12.22   0
  -3   1  14   -9.91   12.06   0
   3   1 -14   14.53   11.77   0
   2  -1 -14   14.40   10.95   0
  -2  -1  14   -8.94   11.28   0
   2   1 -14   -7.47    9.36   0
  -2   1  14    1.77   12.78   0
   1  -1 -14  -16.52    8.95   0
  -1  -1  14   -3.94   11.86   0
  -1   1  14   -5.17   12.26   0
   1   1 -14   -9.07    9.12   0
   0  -1 -14   39.51   10.25   0
   0  -1  14   42.36   13.45   0
   0   1  14   32.84   13.47   0
   0   1 -14   46.43   10.00   0
  -1  -1 -14   45.97   10.06   0
   1  -1  14   41.91   14.61   0
  -1   1 -14   43.84    9.86   0
   1   1  14   49.80   15.01   0
  -2  -1 -14   37.85   10.19   0
   2  -1  14   28.68   15.04   0
  -2   1 -14   38.90   10.65   0
   2   1  14   32.87   15.81   0
   3  -1  14    0.79   17.80   0
  -3  -1 -14    2.49    9.75   0
  -3   1 -14   15.30   10.83   0
   5  -2 -14   24.51   15.89   0
  -5  -2  14   14.64   15.20   0
   5   2 -14   13.28   14.76   0
  -5   2  14    8.87   16.04   0
  -4  -2  14   69.05   15.58   0
   4  -2 -14   51.73   14.82   0
  -4   2  14   69.44   16.45   0
   4   2 -14   45.81   14.17   0
   3  -2 -14    7.65   12.76   0
  -3  -2  14   19.87   12.54   0
  -3   2  14   10.92   13.25   0
   3   2 -14   16.20   11.39   0
  -2  -2  14   51.97   12.75   0
   2  -2 -14   39.32   11.73   0
  -2   2  14   36.64   12.81   0
   2   2 -14   38.51   11.11   0
  -1  -2  14   33.63   12.88   0
   1  -2 -14   25.04   10.30   0
  -1   2  14   22.31   13.01   0
   1   2 -14   27.87    9.66   0
   0  -2  14    6.40   12.75   0
   0  -2 -14   -6.52    9.15   0
   0   2 -14    3.74    8.87   0
   0   2  14   29.43   13.35   0
   1  -2  14    2.10   12.74   0
  -1  -2 -14    4.29    8.62   0
  -1   2 -14    8.50    8.94   0
   1   2  14  -12.17   13.66   0
  -2  -2 -14  135.99   16.12   0
   2  -2  14  159.15   20.72   0
   2   2  14  161.76   21.45   0
  -2   2 -14  156.94   17.10   0
   3  -2  14    7.83   18.33   0
  -3  -2 -14   32.42    9.81   0
   3   2  14    9.95   18.31   0
  -3   2 -14   42.67   11.98   0
   5  -3 -14   33.79   16.29   0
  -5  -3  14   25.42   15.37   0
  -5   3  14   43.26   17.81   0
   5   3 -14   16.70   15.13   0
  -4  -3  14  103.27   16.04   0
   4  -3 -14   79.68   15.72   0
   4   3 -14   33.58   14.51   0
  -4   3  14   78.17   17.46   0
   3  -3 -14    0.86   12.51   0
  -3  -3  14   -7.99   11.78   0
   3   3 -14    3.40   10.36   0
  -3   3  14    5.88   14.92   0
   2  -3 -14   -0.79   11.31   0
  -2  -3  14    3.52   11.94   0
   2   3 -14   -6.97    9.71   0
  -2   3  14   -1.29   13.89   0
  -1  -3  14   10.37   12.59   0
   1  -3 -14   32.19   10.77   0
  -1   3  14   32.19   13.13   0
   1   3 -14   -1.19    9.22   0
   0  -3  14  101.64   15.66   0
   0  -3 -14   81.94   12.79   0
   0   3  14  112.08   17.02   0
   0   3 -14   73.81   11.94   0
   1  -3  14   79.10   15.10   0
  -1  -3 -14   63.75   10.86   0
   1   3  14   78.68   16.51   0
  -1   3 -14   59.66   11.01   0
   2  -3  14   16.69   15.69   0
  -2  -3 -14    4.39    8.90   0
   2   3  14   32.61   16.59   0
  -2   3 -14   17.64    9.99   0
   3  -3  14   -6.50   18.11   0
  -3  -3 -14   47.04    9.89   0
  -3   3 -14   19.20   11.96   0
   3   3  14   40.30   19.74   0
  -5  -4  14   26.09   15.53   0
   5  -4 -14   55.59   17.04   0
  -5   4  14   46.51   18.83   0
   5   4 -14    8.54   14.63   0
  -4  -4  14   14.00   14.16   0
   4  -4 -14   21.71   14.50   0
  -4   4  14   31.23   16.80   0
   4   4 -14    5.38   12.85   0
  -3  -4  14    8.52   12.70   0
   3  -4 -14   10.40   13.26   0
  -3   4  14  -17.64   13.33   0
   3   4 -14    3.11   10.51   0
   2  -4 -14    7.02   12.12   0
  -2  -4  14   16.95   12.37   0
   2   4 -14    9.02   10.12   0
  -2   4  14   48.60   14.40   0
  -1  -4  14    2.30   12.02   0
   1  -4 -14   25.26   11.02   0
  -1   4  14   18.55   12.85   0
   1   4 -14   25.94    9.95   0
   0  -4  14   21.96   13.22   0
   0  -4 -14   11.95    9.38   0
   0   4  14   10.76   14.17   0
   1  -4  14    4.32   14.07   0
  -1  -4 -14   31.78    9.72   0
  -1   4 -14   16.47    9.96   0
   1   4  14   32.06   15.83   0
  -2  -4 -14  -19.83    8.69   0
   2  -4  14   19.72   15.76   0
   2   4  14   -5.86   16.32   0
  -2   4 -14   16.68   10.45   0
  -3  -4 -14   75.15   10.90   0
   3  -4  14   91.89   19.75   0
  -3   4 -14   60.51   13.88   0
   3   4  14   79.34   22.35   0
  -5  -5  14    7.33   15.86   0
   5  -5 -14   -0.62   16.58   0
   5   5 -14  -24.13   14.20   0
  -5   5  14   -3.40   18.52   0
  -4  -5  14   -2.48   14.41   0
   4  -5 -14   11.18   14.98   0
  -4   5  14    5.46   17.65   0
   4   5 -14  -14.73   11.70   0
  -3  -5  14    9.08   12.97   0
   3  -5 -14   29.31   13.67   0
   3   5 -14   21.75   11.19   0
  -3   5  14   21.11   16.72   0
  -2  -5  14   14.08   13.40   0
   2  -5 -14   17.38   12.94   0
   2   5 -14   -0.54    9.99   0
  -2   5  14   -8.72   13.38   0
   1  -5 -14    8.31   11.38   0
  -1  -5  14   -7.87   12.12   0
   1   5 -14   -9.07    9.07   0
  -1   5  14    5.47   13.14   0
   0  -5 -14   21.57   10.68   0
   0  -5  14   10.34   12.54   0
   0   5 -14   13.13    9.56   0
   0   5  14   23.69   15.12   0
  -1  -5 -14   42.15   10.84   0
   1  -5  14   49.82   15.29   0
   1   5  14   21.11   16.62   0
  -1   5 -14   35.13   10.75   0
  -2  -5 -14  -11.68    8.75   0
   2  -5  14  -29.66   15.27   0
   2   5  14    9.38   18.31   0
  -2   5 -14   16.28   11.01   0
   3   5  14   24.92   19.74   0
  -5   6  14   11.70   20.32   0
  -4  -6  14   18.62   14.77   0
   4  -6 -14   15.36   16.10   0
  -4   6  14   24.28   19.03   0
   4   6 -14   31.75   13.04   0
   3  -6 -14   -6.87   14.19   0
  -3  -6  14   -3.13   12.74   0
  -3   6  14   21.54   16.21   0
   3   6 -14  -14.67   10.59   0
  -2  -6  14    7.02   12.57   0
   2  -6 -14   14.95   13.10   0
   2   6 -14   -0.30   10.21   0
  -2   6  14   16.04   15.43   0
  -1  -6  14   21.16   13.17   0
   1  -6 -14   35.88   12.06   0
  -1   6  14   13.47   14.93   0
   1   6 -14   18.01   10.00   0
   0  -6 -14   37.47   11.43   0
   0  -6  14   37.67   14.64   0
   0   6 -14   39.19   10.78   0
   0   6  14   36.97   16.11   0
  -1  -6 -14    2.40    9.63   0
   1  -6  14   17.44   15.40   0
   1   6  14   19.14   16.16   0
  -1   6 -14    8.80   10.67   0
   2  -6  14   20.33   16.43   0
  -2  -6 -14   12.94    9.39   0
   2   6  14   29.14   18.52   0
  -2   6 -14  -10.41   11.93   0
   4  -7 -14   30.57   16.77   0
  -4  -7  14   14.55   15.97   0
   4   7 -14   32.16   13.36   0
  -4   7  14   34.70   19.60   0
  -3  -7  14   24.78   14.39   0
   3  -7 -14   15.72   15.01   0
   3   7 -14   -2.37   11.40   0
  -3   7  14   12.78   17.75   0
   2  -7 -14    6.09   13.24   0
  -2  -7  14   28.17   13.94   0
  -2   7  14   22.56   17.06   0
   2   7 -14  -15.65   10.19   0
  -1  -7  14   48.77   14.74   0
   1  -7 -14   32.98   12.80   0
   1   7 -14   20.76   10.63   0
  -1   7  14   38.07   16.63   0
   0  -7  14   25.41   14.89   0
   0  -7 -14   13.41   11.45   0
   0   7 -14   21.52   10.44   0
   0   7  14   29.68   16.47   0
   1  -7  14   23.86   16.76   0
  -1  -7 -14   24.41   10.35   0
  -1   7 -14   20.96   11.77   0
   1   7  14   30.73   18.60   0
  -2  -7 -14   26.00    9.98   0
   2  -7  14   17.10   18.26   0
   2   7  14   11.72   19.68   0
  -2   7 -14   27.46   13.30   0
  -4  -8  14  -10.75   15.37   0
  -4   8  14   35.20   20.49   0
  -3  -8  14   -5.42   14.42   0
   3  -8 -14  -14.90   15.73   0
  -3   8  14   10.53   18.46   0
   3   8 -14  -13.84   11.78   0
   2  -8 -14   23.33   14.35   0
  -2  -8  14   50.34   14.76   0
   2   8 -14   37.83   12.05   0
  -2   8  14   30.70   18.60   0
  -1  -8  14  -31.35   14.02   0
   1  -8 -14    6.22   13.16   0
  -1   8  14   -0.20   16.64   0
   1   8 -14  -13.36   10.55   0
   0  -8 -14   29.40   12.58   0
   0  -8  14  -15.59   15.55   0
   0   8  14   28.65   19.06   0
   0   8 -14   19.89   11.63   0
   1  -8  14   10.48   17.10   0
  -1  -8 -14   -5.76   10.47   0
  -1   8 -14   13.97   11.78   0
   1   8  14  -15.03   18.07   0
  -3  -9  14   25.27   15.55   0
  -3   9  14   25.91   21.48   0
  -2  -9  14   35.93   15.13   0
   2  -9 -14   11.44   14.25   0
   2   9 -14  -30.40   11.34   0
  -2   9  14  -16.61   18.26   0
   1  -9 -14   40.80   13.56   0
  -1  -9  14   41.35   15.55   0
   1   9 -14   -2.98   11.43   0
  -1   9  14   26.95   19.55   0
   0  -9  14    8.50   16.57   0
   0  -9 -14   29.33   12.68   0
   0   9 -14   26.44   11.48   0
   0   9  14   -1.24   18.95   0
  -5   0  15  -19.22   17.72   0
  -4   0  15   -5.85   16.15   0
   4   0 -15   -0.16   15.19   0
  -3   0  15    5.31   14.92   0
   3   0 -15    4.23   12.77   0
   2   0 -15    5.91   11.72   0
  -2   0  15   42.42   14.92   0
   1   0 -15    1.05   10.89   0
  -1   0  15    5.70   14.88   0
   0   0 -15    2.79   10.72   0
   0   0  15    8.64   14.22   0
   1   0  15   -0.77   16.18   0
  -1   0 -15   -0.46   10.33   0
   2   0  15   30.05   18.66   0
  -2   0 -15    7.69   11.56   0
  -5  -1  15   47.08   19.03   0
  -5   1  15   53.59   20.12   0
  -4  -1  15   -5.67   16.47   0
   4  -1 -15  -16.47   15.21   0
  -4   1  15   -1.21   17.14   0
   4   1 -15   -0.35   14.41   0
   3  -1 -15  -24.48   13.34   0
  -3  -1  15   13.06   15.05   0
   3   1 -15   -5.03   13.15   0
  -3   1  15   12.88   15.69   0
  -2  -1  15  -18.65   12.68   0
   2  -1 -15   23.61   12.64   0
   2   1 -15   -9.30   11.44   0
  -2   1  15   11.16   14.92   0
   1  -1 -15   47.59   12.53   0
  -1  -1  15   48.28   15.81   0
  -1   1  15   43.44   15.43   0
   1   1 -15   27.40   11.51   0
   0  -1 -15    5.99   10.74   0
   0  -1  15    4.95   15.34   0
   0   1 -15    6.72   10.64   0
   0   1  15   12.15   15.50   0
  -1  -1 -15   10.82   10.68   0
   1  -1  15    9.87   16.26   0
   1   1  15  -23.11   16.94   0
  -1   1 -15   14.86   10.40   0
   2  -1  15    5.92   18.60   0
  -2  -1 -15   21.30   11.26   0
  -2   1 -15   -8.12   11.11   0
   2   1  15   28.07   19.62   0
  -4  -2  15   43.87   16.68   0
   4  -2 -15   -2.99   15.87   0
  -4   2  15   41.48   18.09   0
   4   2 -15   23.69   14.96   0
   3  -2 -15   -1.47   14.40   0
  -3  -2  15   29.59   15.52   0
   3   2 -15   -9.23   12.06   0
  -3   2  15   15.63   16.91   0
  -2  -2  15   19.05   14.28   0
   2  -2 -15   13.71   12.80   0
  -2   2  15    9.19   15.47   0
   2   2 -15    3.62   11.41   0
  -1  -2  15   17.70   14.95   0
   1  -2 -15   -6.12   11.73   0
  -1   2  15    2.21   15.38   0
   1   2 -15  -12.64   10.24   0
   0  -2 -15   14.35   10.66   0
   0  -2  15   -5.39   15.28   0
   0   2  15  -18.79   14.97   0
   0   2 -15  -17.61    9.89   0
   1  -2  15   10.73   16.33   0
  -1  -2 -15   13.85   10.77   0
  -1   2 -15   19.20   11.03   0
   1   2  15   18.28   16.47   0
   2  -2  15    9.38   18.80   0
  -2  -2 -15   21.25   11.46   0
   2   2  15   -1.01   18.61   0
  -2   2 -15   -0.05   11.81   0
  -4  -3  15    6.90   16.59   0
   4  -3 -15   30.43   15.96   0
   4   3 -15    5.86   13.91   0
  -4   3  15  -21.03   17.93   0
   3  -3 -15   -1.15   14.58   0
  -3  -3  15    1.22   14.18   0
  -3   3  15   12.77   17.35   0
   3   3 -15  -10.22   12.69   0
  -2  -3  15   35.28   15.76   0
   2  -3 -15   53.72   14.37   0
  -2   3  15   67.95   16.68   0
   2   3 -15   43.12   12.49   0
   1  -3 -15   13.40   12.02   0
  -1  -3  15   24.86   15.61   0
   1   3 -15   13.41   11.09   0
  -1   3  15   31.91   15.54   0
   0  -3 -15   18.56   11.25   0
   0  -3  15   21.96   15.67   0
   0   3  15   33.08   17.06   0
   0   3 -15   36.79   11.46   0
   1  -3  15   22.02   16.19   0
  -1  -3 -15    1.01   10.98   0
   1   3  15   24.97   17.58   0
  -1   3 -15    8.50   11.26   0
  -2  -3 -15   71.76   13.02   0
   2  -3  15   93.48   19.78   0
  -2   3 -15   81.49   14.13   0
   2   3  15   94.91   21.38   0
  -4  -4  15   18.02   16.15   0
   4  -4 -15   13.30   16.74   0
  -4   4  15   10.67   19.59   0
   4   4 -15   -6.10   13.14   0
  -3  -4  15   81.02   17.35   0
   3  -4 -15   42.07   16.44   0
  -3   4  15   57.31   18.15   0
   3   4 -15   46.55   13.60   0
  -2  -4  15   15.61   15.57   0
   2  -4 -15  -14.03   13.96   0
   2   4 -15   22.64   11.74   0
  -2   4  15   18.93   17.41   0
   1  -4 -15    2.93   11.76   0
  -1  -4  15   12.54   14.55   0
   1   4 -15   -5.63   10.53   0
  -1   4  15    3.30   15.60   0
   0  -4 -15   83.29   13.73   0
   0  -4  15   97.37   17.65   0
   0   4 -15   93.30   13.69   0
   0   4  15   60.25   18.97   0
   1  -4  15   59.95   17.03   0
  -1  -4 -15   84.71   12.89   0
  -1   4 -15   38.94   12.84   0
   1   4  15   60.09   19.38   0
  -2  -4 -15   15.44   11.15   0
   2  -4  15   21.77   26.03   0
  -2   4 -15   16.46   13.24   0
   2   4  15   18.42   19.27   0
   4  -5 -15   41.78   17.24   0
  -4  -5  15    5.51   16.50   0
  -4   5  15   23.84   19.47   0
   4   5 -15   10.37   13.69   0
   3  -5 -15  -29.78   15.84   0
  -3  -5  15    7.80   15.04   0
   3   5 -15    9.93   12.26   0
  -3   5  15   13.99   18.92   0
  -2  -5  15   37.75   15.62   0
   2  -5 -15   22.04   14.56   0
  -2   5  15   -3.95   17.07   0
   2   5 -15   -4.34   10.98   0
  -1  -5  15  101.60   17.60   0
   1  -5 -15   34.71   14.17   0
  -1   5  15   64.23   19.20   0
   1   5 -15   54.48   12.50   0
   0  -5  15   43.23   16.65   0
   0  -5 -15  -10.69   12.46   0
   0   5 -15   26.42   11.26   0
   0   5  15   23.05   18.58   0
   1  -5  15    9.58   17.06   0
  -1  -5 -15   11.14   11.43   0
   1   5  15    4.63   18.73   0
  -1   5 -15  -27.15   11.54   0
   3  -6 -15   39.96   16.65   0
  -3  -6  15   46.68   17.14   0
  -3   6  15   79.17   21.19   0
   3   6 -15   56.60   13.93   0
   2  -6 -15   32.22   16.27   0
  -2  -6  15   10.54   16.00   0
  -2   6  15    5.67   17.60   0
   2   6 -15   11.68   11.98   0
  -1  -6  15  -18.26   14.90   0
   1  -6 -15   -9.94   13.47   0
   1   6 -15  -12.87   11.24   0
  -1   6  15    4.27   18.57   0
   0  -6  15   -7.04   15.75   0
   0  -6 -15   16.46   12.99   0
   0   6  15    7.83   19.43   0
   0   6 -15   26.28   11.91   0
   1  -6  15   61.19   18.60   0
  -1  -6 -15   42.56   13.09   0
  -1   6 -15   40.42   13.16   0
   1   6  15  108.37   21.95   0
  -3  -7  15   19.19   16.89   0
  -2  -7  15  150.26   21.08   0
   2  -7 -15   97.29   19.76   0
  -2   7  15  175.58   24.60   0
   1  -7 -15  112.53   17.59   0
  -1  -7  15  117.73   19.68   0
  -1   7  15  105.03   22.73   0
   0  -7 -15  -31.78   13.01   0
   0  -7  15  -19.01   16.04   0
   0   7  15   -4.03   19.65   0
   0   7 -15    6.83   12.00   0
  -3   0  16   93.71   20.94   0
   3   0 -16   67.50   16.55   0
  -2   0  16    5.30   16.96   0
   2   0 -16   -0.46   13.60   0
  -1   0  16   39.85   18.49   0
   1   0 -16   54.82   13.96   0
   0   0 -16   52.86   13.69   0
   0   0  16   66.71   19.24   0
   1   0  16   57.26   25.54   0
  -1   0 -16   87.68   14.38   0
   3  -1 -16   42.26   15.70   0
  -3  -1  16   79.96   20.05   0
  -3   1  16   53.72   20.28   0
   3   1 -16   16.93   13.93   0
  -2  -1  16   54.32   18.65   0
   2  -1 -16   42.50   14.60   0
  -2   1  16   98.70   19.93   0
   2   1 -16   41.31   14.27   0
  -1  -1  16   -3.67   16.90   0
   1  -1 -16   14.25   13.28   0
  -1   1  16   10.35   18.00   0
   1   1 -16   14.21   12.73   0
   0  -1  16   20.84   18.04   0
   0  -1 -16   -5.35   11.96   0
   0   1 -16   -1.78   12.27   0
   0   1  16   37.04   18.73   0
   1   1  16  116.99   28.03   0
   3  -2 -16   -4.63   15.21   0
  -3  -2  16   12.60   18.98   0
   3   2 -16   13.17   14.49   0
  -3   2  16  -13.72   19.04   0
   2  -2 -16   18.32   14.19   0
  -2  -2  16    9.40   18.06   0
   2   2 -16   15.02   13.25   0
  -2   2  16  -14.43   18.60   0
   1  -2 -16   27.08   14.39   0
  -1  -2  16   87.06   19.02   0
   1   2 -16   50.27   13.63   0
  -1   2  16   70.16   19.30   0
   0  -2  16   66.95   19.45   0
   0  -2 -16   72.02   14.89   0
   0   2 -16   75.31   14.55   0
   0   2  16   75.36   21.28   0
  -3  -3  16    5.55   18.45   0
  -3   3  16   -0.22   18.83   0
   2  -3 -16   87.24   17.07   0
  -2  -3  16   63.11   19.88   0
   2   3 -16   45.43   13.85   0
  -2   3  16   68.56   20.41   0
  -1  -3  16   -2.19   18.06   0
   1  -3 -16   24.24   14.83   0
  -1   3  16   27.14   18.50   0
   1   3 -16   24.61   13.34   0
   0  -3 -16   42.34   13.69   0
   0  -3  16   35.93   17.80   0
   0   3  16   30.46   19.48   0
   0   3 -16   33.48   13.18   0
   2  -4 -16   50.83   16.88   0
  -2  -4  16   62.68   19.67   0
   2   4 -16   48.56   14.15   0
  -2   4  16   65.50   19.85   0
   1  -4 -16   26.24   14.49   0
  -1  -4  16   54.23   18.55   0
   1   4 -16   38.55   13.10   0
  -1   4  16   23.26   18.59   0
   0  -4  16    8.48   22.34   0
   0   4  16   -0.74   22.27   0
  -1  -5  16   11.02   18.59   0
;

_shelx_hkl_checksum              71092

# ............... End of .HKL file .............................................
#----------------------------------------------------------------------------#

#----------------------------------------------------------------------------#
#                ATOMIC TYPES, COORDINATES AND THERMAL PARAMETERS            #
#----------------------------------------------------------------------------#

loop_
    _atom_type_symbol
    _atom_type_description
    _atom_type_scat_dispersion_real
    _atom_type_scat_dispersion_imag
    _atom_type_scat_source
C   C    0.0033  0.0016  'International Tables Vol C Tables 4.2.6.8 and 6.1.1.4'
H   H    0.0000  0.0000  'International Tables Vol C Tables 4.2.6.8 and 6.1.1.4'
N   N    0.0061  0.0033  'International Tables Vol C Tables 4.2.6.8 and 6.1.1.4'
S   S    0.1246  0.1234  'International Tables Vol C Tables 4.2.6.8 and 6.1.1.4'

loop_
    _atom_site_label
    _atom_site_type_symbol
    _atom_site_fract_x
    _atom_site_fract_y
    _atom_site_fract_z
    _atom_site_U_iso_or_equiv
    _atom_site_adp_type
    _atom_site_occupancy
    _atom_site_site_symmetry_order
    _atom_site_calc_flag
    _atom_site_refinement_flags_posn
    _atom_site_refinement_flags_adp
    _atom_site_refinement_flags_occupancy
    _atom_site_disorder_assembly
    _atom_site_disorder_group
N1   N   0.3809(4)    0.19411(17)  0.5327(2)    0.0285(7)   Uani 1  1 d    .  . .  . .
C2   C   0.3378(5)    0.2683(2)    0.5011(2)    0.0199(7)   Uani 1  1 d    .  . .  . .
C3   C   0.2781(4)    0.35652(19)  0.4484(2)    0.0163(6)   Uani 1  1 d    .  . .  . .
C4   C   0.2295(4)    0.3467(2)    0.3411(2)    0.0183(6)   Uani 1  1 d    .  . .  . .
H4   H   0.2368       0.2859       0.3101       0.022       Uiso 1  1 calc R  U .  . .
C5   C   0.1702(5)    0.4233(2)    0.2775(2)    0.0205(7)   Uani 1  1 d    .  . .  . .
H5   H   0.1386       0.4160       0.2032       0.025       Uiso 1  1 calc R  U .  . .
C6   C   0.1579(4)    0.5102(2)    0.3236(2)    0.0180(6)   Uani 1  1 d    .  . .  . .
H6   H   0.1146       0.5632       0.2807       0.022       Uiso 1  1 calc R  U .  . .
C7   C   0.2077(4)    0.52271(19)  0.4328(2)    0.0143(6)   Uani 1  1 d    .  . .  . .
C8   C   0.2693(4)    0.44551(19)  0.5000(2)    0.0130(6)   Uani 1  1 d    .  . .  . .
C9   C   0.3179(4)    0.46191(19)  0.6132(2)    0.0138(6)   Uani 1  1 d    .  . .  . .
C10  C   0.3775(4)    0.3899(2)    0.6871(2)    0.0185(6)   Uani 1  1 d    .  . .  . .
H10  H   0.3867       0.3268       0.6626       0.022       Uiso 1  1 calc R  U .  . .
C11  C   0.4225(5)    0.4074(2)    0.7925(2)    0.0212(7)   Uani 1  1 d    .  . .  . .
H11  H   0.4601       0.3567       0.8399       0.025       Uiso 1  1 calc R  U .  . .
C12  C   0.4136(5)    0.4988(2)    0.8309(2)    0.0213(7)   Uani 1  1 d    .  . .  . .
H12  H   0.4473       0.5111       0.9042       0.026       Uiso 1  1 calc R  U .  . .
C13  C   0.3561(4)    0.5710(2)    0.7624(2)    0.0192(7)   Uani 1  1 d    .  . .  . .
H13  H   0.3505       0.6336       0.7889       0.023       Uiso 1  1 calc R  U .  . .
C14  C   0.3053(4)    0.55463(19)  0.6544(2)    0.0147(6)   Uani 1  1 d    .  . .  . .
C15  C   0.2415(4)    0.63135(19)  0.5845(2)    0.0140(6)   Uani 1  1 d    .  . .  . .
C16  C   0.1951(4)    0.61413(19)  0.4789(2)    0.0142(6)   Uani 1  1 d    .  . .  . .
C17  C   0.2146(4)    0.72891(18)  0.6105(2)    0.0160(6)   Uani 1  1 d    .  . .  . .
H17  H   0.2402       0.7532       0.6803       0.019       Uiso 1  1 calc R  U .  . .
C18  C   0.1490(4)    0.7826(2)    0.5254(2)    0.0178(6)   Uani 1  1 d    .  . .  . .
C19  C   0.1021(5)    0.8859(2)    0.5221(2)    0.0242(7)   Uani 1  1 d    .  . .  . .
H19A H   0.1557       0.9152       0.5893       0.036       Uiso 1  1 calc R  U .  . .
H19B H  -0.0385       0.8943       0.5099       0.036       Uiso 1  1 calc R  U .  . .
H19C H   0.1584       0.9159       0.4648       0.036       Uiso 1  1 calc R  U .  . .
S1   S   0.11738(11)  0.71646(5)   0.41059(5)   0.0183(2)   Uani 1  1 d    .  . .  . .

loop_
    _atom_site_aniso_label
    _atom_site_aniso_U_11
    _atom_site_aniso_U_22
    _atom_site_aniso_U_33
    _atom_site_aniso_U_23
    _atom_site_aniso_U_13
    _atom_site_aniso_U_12
N1   0.0409(19)   0.0215(14)   0.0230(14)  -0.0005(11)   0.0046(12)   0.0048(13)
C2   0.0236(17)   0.0225(17)   0.0138(14)  -0.0038(11)   0.0038(12)   0.0003(13)
C3   0.0137(16)   0.0190(14)   0.0175(14)  -0.0004(11)   0.0068(12)  -0.0002(12)
C4   0.0179(17)   0.0212(14)   0.0169(14)  -0.0048(12)   0.0059(12)  -0.0006(13)
C5   0.0235(18)   0.0260(15)   0.0117(14)  -0.0024(12)   0.0016(12)  -0.0006(13)
C6   0.0184(17)   0.0217(15)   0.0143(14)   0.0026(11)   0.0038(12)  -0.0003(13)
C7   0.0123(15)   0.0177(14)   0.0133(13)   0.0017(11)   0.0030(11)  -0.0013(12)
C8   0.0093(15)   0.0158(13)   0.0149(13)  -0.0009(11)   0.0054(11)  -0.0017(11)
C9   0.0129(15)   0.0172(13)   0.0124(13)   0.0010(11)   0.0052(11)  -0.0012(12)
C10  0.0226(18)   0.0155(13)   0.0183(15)   0.0002(11)   0.0063(12)  -0.0028(12)
C11  0.0231(18)   0.0239(16)   0.0165(15)   0.0073(12)   0.0023(13)   0.0003(13)
C12  0.0265(18)   0.0270(15)   0.0105(14)  -0.0015(12)   0.0031(12)   0.0011(14)
C13  0.0221(18)   0.0182(14)   0.0177(15)  -0.0013(11)   0.0046(13)   0.0014(13)
C14  0.0146(16)   0.0181(14)   0.0120(13)   0.0015(11)   0.0046(11)  -0.0003(12)
C15  0.0124(15)   0.0163(14)   0.0141(13)  -0.0013(10)   0.0049(11)  -0.0032(11)
C16  0.0136(15)   0.0147(13)   0.0152(14)   0.0042(11)   0.0053(11)  -0.0003(12)
C17  0.0195(16)   0.0130(14)   0.0169(14)  -0.0015(11)   0.0075(12)  -0.0025(12)
C18  0.0191(16)   0.0160(13)   0.0196(14)   0.0001(12)   0.0074(12)  -0.0016(13)
C19  0.033(2)     0.0159(14)   0.0244(16)   0.0004(12)   0.0059(14)   0.0021(14)
S1   0.0244(4)    0.0151(3)    0.0154(3)    0.0031(3)    0.0030(3)    0.0004(3)


#----------------------------------------------------------------------------#
#                               MOLECULAR GEOMETRY                           #
#----------------------------------------------------------------------------#

_geom_special_details
;
 All esds (except the esd in the dihedral angle between two l.s. planes)
 are estimated using the full covariance matrix.  The cell esds are taken
 into account individually in the estimation of esds in distances, angles
 and torsion angles; correlations between esds in cell parameters are only
 used when they are defined by crystal symmetry.  An approximate (isotropic)
 treatment of cell esds is used for estimating esds involving l.s. planes.
;
loop_
    _geom_bond_atom_site_label_1
    _geom_bond_atom_site_label_2
    _geom_bond_distance
    _geom_bond_site_symmetry_2
    _geom_bond_publ_flag
N1   C2   1.147(4)    .           ?
C2   C3   1.448(4)    .           ?
C3   C4   1.375(4)    .           ?
C3   C8   1.425(4)    .           ?
C4   C5   1.382(4)    .           ?
C4   H4   0.9500      .           ?
C5   C6   1.370(4)    .           ?
C5   H5   0.9500      .           ?
C6   C7   1.402(4)    .           ?
C6   H6   0.9500      .           ?
C7   C8   1.416(4)    .           ?
C7   C16  1.428(4)    .           ?
C8   C9   1.459(4)    .           ?
C9   C10  1.410(4)    .           ?
C9   C14  1.419(4)    .           ?
C10  C11  1.364(4)    .           ?
C10  H10  0.9500      .           ?
C11  C12  1.385(4)    .           ?
C11  H11  0.9500      .           ?
C12  C13  1.366(4)    .           ?
C12  H12  0.9500      .           ?
C13  C14  1.397(4)    .           ?
C13  H13  0.9500      .           ?
C14  C15  1.434(4)    .           ?
C15  C16  1.367(4)    .           ?
C15  C17  1.436(4)    .           ?
C16  S1   1.735(3)    .           ?
C17  C18  1.351(4)    .           ?
C17  H17  0.9500      .           ?
C18  C19  1.494(4)    .           ?
C18  S1   1.730(3)    .           ?
C19  H19A 0.9800      .           ?
C19  H19B 0.9800      .           ?
C19  H19C 0.9800      .           ?

loop_
    _geom_angle_atom_site_label_1
    _geom_angle_atom_site_label_2
    _geom_angle_atom_site_label_3
    _geom_angle
    _geom_angle_site_symmetry_1
    _geom_angle_site_symmetry_3
    _geom_angle_publ_flag
N1   C2   C3   172.9(3)     .       .       ?
C4   C3   C8   122.1(3)     .       .       ?
C4   C3   C2   113.0(2)     .       .       ?
C8   C3   C2   124.8(2)     .       .       ?
C3   C4   C5   121.3(3)     .       .       ?
C3   C4   H4   119.3        .       .       ?
C5   C4   H4   119.3        .       .       ?
C6   C5   C4   118.6(3)     .       .       ?
C6   C5   H5   120.7        .       .       ?
C4   C5   H5   120.7        .       .       ?
C5   C6   C7   121.4(3)     .       .       ?
C5   C6   H6   119.3        .       .       ?
C7   C6   H6   119.3        .       .       ?
C6   C7   C8   121.3(3)     .       .       ?
C6   C7   C16  120.4(2)     .       .       ?
C8   C7   C16  118.4(2)     .       .       ?
C7   C8   C3   115.2(2)     .       .       ?
C7   C8   C9   119.2(2)     .       .       ?
C3   C8   C9   125.5(2)     .       .       ?
C10  C9   C14  116.3(2)     .       .       ?
C10  C9   C8   123.8(2)     .       .       ?
C14  C9   C8   119.9(2)     .       .       ?
C11  C10  C9   122.5(3)     .       .       ?
C11  C10  H10  118.8        .       .       ?
C9   C10  H10  118.8        .       .       ?
C10  C11  C12  120.3(3)     .       .       ?
C10  C11  H11  119.9        .       .       ?
C12  C11  H11  119.9        .       .       ?
C13  C12  C11  119.4(3)     .       .       ?
C13  C12  H12  120.3        .       .       ?
C11  C12  H12  120.3        .       .       ?
C12  C13  C14  121.4(3)     .       .       ?
C12  C13  H13  119.3        .       .       ?
C14  C13  H13  119.3        .       .       ?
C13  C14  C9   120.1(3)     .       .       ?
C13  C14  C15  120.3(3)     .       .       ?
C9   C14  C15  119.6(2)     .       .       ?
C16  C15  C14  119.4(2)     .       .       ?
C16  C15  C17  112.3(2)     .       .       ?
C14  C15  C17  128.2(2)     .       .       ?
C15  C16  C7   123.5(2)     .       .       ?
C15  C16  S1   111.3(2)     .       .       ?
C7   C16  S1   125.3(2)     .       .       ?
C18  C17  C15  113.1(2)     .       .       ?
C18  C17  H17  123.5        .       .       ?
C15  C17  H17  123.5        .       .       ?
C17  C18  C19  128.2(3)     .       .       ?
C17  C18  S1   111.7(2)     .       .       ?
C19  C18  S1   120.2(2)     .       .       ?
C18  C19  H19A 109.5        .       .       ?
C18  C19  H19B 109.5        .       .       ?
H19A C19  H19B 109.5        .       .       ?
C18  C19  H19C 109.5        .       .       ?
H19A C19  H19C 109.5        .       .       ?
H19B C19  H19C 109.5        .       .       ?
C18  S1   C16   91.65(14)   .       .       ?

loop_
    _geom_torsion_atom_site_label_1
    _geom_torsion_atom_site_label_2
    _geom_torsion_atom_site_label_3
    _geom_torsion_atom_site_label_4
    _geom_torsion
    _geom_torsion_site_symmetry_1
    _geom_torsion_site_symmetry_2
    _geom_torsion_site_symmetry_3
    _geom_torsion_site_symmetry_4
    _geom_torsion_publ_flag
C8   C3   C4   C5      0.3(5)     .       .       .       .       ?
C2   C3   C4   C5   -179.6(3)     .       .       .       .       ?
C3   C4   C5   C6     -0.9(5)     .       .       .       .       ?
C4   C5   C6   C7      1.3(5)     .       .       .       .       ?
C5   C6   C7   C8     -1.2(4)     .       .       .       .       ?
C5   C6   C7   C16   179.5(3)     .       .       .       .       ?
C6   C7   C8   C3      0.6(4)     .       .       .       .       ?
C16  C7   C8   C3    179.9(3)     .       .       .       .       ?
C6   C7   C8   C9   -179.4(3)     .       .       .       .       ?
C16  C7   C8   C9     -0.2(4)     .       .       .       .       ?
C4   C3   C8   C7     -0.2(4)     .       .       .       .       ?
C2   C3   C8   C7    179.7(3)     .       .       .       .       ?
C4   C3   C8   C9    179.9(3)     .       .       .       .       ?
C2   C3   C8   C9     -0.3(5)     .       .       .       .       ?
C7   C8   C9   C10   178.9(3)     .       .       .       .       ?
C3   C8   C9   C10    -1.1(5)     .       .       .       .       ?
C7   C8   C9   C14    -0.8(4)     .       .       .       .       ?
C3   C8   C9   C14   179.2(3)     .       .       .       .       ?
C14  C9   C10  C11    -0.5(4)     .       .       .       .       ?
C8   C9   C10  C11   179.8(3)     .       .       .       .       ?
C9   C10  C11  C12    -1.0(5)     .       .       .       .       ?
C10  C11  C12  C13     1.2(5)     .       .       .       .       ?
C11  C12  C13  C14     0.2(5)     .       .       .       .       ?
C12  C13  C14  C9     -1.7(5)     .       .       .       .       ?
C12  C13  C14  C15   178.7(3)     .       .       .       .       ?
C10  C9   C14  C13     1.8(4)     .       .       .       .       ?
C8   C9   C14  C13  -178.5(3)     .       .       .       .       ?
C10  C9   C14  C15  -178.6(3)     .       .       .       .       ?
C8   C9   C14  C15     1.1(4)     .       .       .       .       ?
C13  C14  C15  C16   179.1(3)     .       .       .       .       ?
C9   C14  C15  C16    -0.5(4)     .       .       .       .       ?
C13  C14  C15  C17    -2.0(5)     .       .       .       .       ?
C9   C14  C15  C17   178.4(3)     .       .       .       .       ?
C14  C15  C16  C7     -0.4(4)     .       .       .       .       ?
C17  C15  C16  C7   -179.5(3)     .       .       .       .       ?
C14  C15  C16  S1    178.8(2)     .       .       .       .       ?
C17  C15  C16  S1     -0.3(3)     .       .       .       .       ?
C6   C7   C16  C15  -179.9(3)     .       .       .       .       ?
C8   C7   C16  C15     0.8(4)     .       .       .       .       ?
C6   C7   C16  S1      1.0(4)     .       .       .       .       ?
C8   C7   C16  S1   -178.3(2)     .       .       .       .       ?
C16  C15  C17  C18     0.1(4)     .       .       .       .       ?
C14  C15  C17  C18  -178.8(3)     .       .       .       .       ?
C15  C17  C18  C19   179.1(3)     .       .       .       .       ?
C15  C17  C18  S1      0.1(3)     .       .       .       .       ?
C17  C18  S1   C16    -0.2(2)     .       .       .       .       ?
C19  C18  S1   C16  -179.3(3)     .       .       .       .       ?
C15  C16  S1   C18     0.3(2)     .       .       .       .       ?
C7   C16  S1   C18   179.5(3)     .       .       .       .       ?


#----------------------------------------------------------------------------#
#===END OF CIF FILE FOR WH_P4_26b                                            #
#----------------------------------------------------------------------------#
